# Supplementary material for: Extracellular Vesicles and Their Mimetics: A Comparative Study of Their Pharmacological Activities and Immunogenicity Profiles
Source: MDPI journal article supplement (doi:10.3390/pharmaceutics15041290), 2023-04-20

## **Supplementary Material**

### **Extracellular Vesicles and their mimetics: A Comparative Study of their Pharmacological Activities and Immunogenicity Profiles**

**Wei Heng Chng <sup>1,2,†</sup>, Ram Pravin Kumar Muthuramalingam <sup>2,†</sup>, Charles Kang Liang Lou <sup>3,4</sup>, Silas New <sup>2</sup>, Yub Raj Neupane <sup>2,5</sup>, Choon Keong Lee <sup>2</sup>, Ayca Altay Benetti <sup>2</sup>, Chenyuan Huang <sup>3,6</sup>, Praveen Thoniyot <sup>7</sup>, Wei Seong Toh <sup>1,8,9</sup>, Jiong-Wei Wang <sup>3,4,6,10</sup> and Giorgia Pastorin <sup>1,2,\*</sup>**

**Supplementary Table S1: Proteomics Analysis of A) U937 EVs and B) U937 CDNs (95% confidence intervals and 1% false discovery rate).**

**A) Proteomics Analysis of U937 EVs**

| Accession #           | Species | Name                                                                                      |
|-----------------------|---------|-------------------------------------------------------------------------------------------|
| sp P49327 FAS_HUMAN   | HUMAN   | Fatty acid synthase OS=Homo sapiens OX=9606 GN=FASN PE=1 SV=3                             |
| sp Q14204 DYHC1_HUMAN | HUMAN   | Cytoplasmic dynein 1 heavy chain 1 OS=Homo sapiens OX=9606 GN=DYNC1H1 PE=1 SV=5           |
| sp Q00610 CLH1_HUMAN  | HUMAN   | Clathrin heavy chain 1 OS=Homo sapiens OX=9606 GN=CLTC PE=1 SV=5                          |
| sp P78527 PRKDC_HUMAN | HUMAN   | DNA-dependent protein kinase catalytic subunit OS=Homo sapiens OX=9606 GN=PRKDC PE=1 SV=3 |
| sp P29144 TPP2_HUMAN  | HUMAN   | Tripeptidyl-peptidase 2 OS=Homo sapiens OX=9606 GN=TPP2 PE=1 SV=4                         |
| sp P35579 MYH9_HUMAN  | HUMAN   | Myosin-9 OS=Homo sapiens OX=9606 GN=MYH9 PE=1 SV=4                                        |
| sp Q9Y490 TLN1_HUMAN  | HUMAN   | Talin-1 OS=Homo sapiens OX=9606 GN=TLN1 PE=1 SV=3                                         |
| sp P14618 KPYM_HUMAN  | HUMAN   | Pyruvate kinase PKM OS=Homo sapiens OX=9606 GN=PKM PE=1 SV=4                              |
| sp P08238 HS90B_HUMAN | HUMAN   | Heat shock protein HSP 90-beta OS=Homo sapiens OX=9606 GN=HSP90AB1 PE=1 SV=4              |
| sp P53396 ACLY_HUMAN  | HUMAN   | ATP-citrate synthase OS=Homo sapiens OX=9606 GN=ACLY PE=1 SV=3                            |
| contam_sp ALBU_BOVIN  |         | contam_sp ALBU_BOVIN                                                                      |
| sp P04264 K2C1_HUMAN  | HUMAN   | Keratin, type II cytoskeletal 1 OS=Homo sapiens OX=9606 GN=KRT1 PE=1 SV=6                 |
| sp P22314 UBA1_HUMAN  | HUMAN   | Ubiquitin-like modifier-activating enzyme 1 OS=Homo sapiens OX=9606 GN=UBA1 PE=1 SV=3     |
| sp P53621 COPA_HUMAN  | HUMAN   | Coatomer subunit alpha OS=Homo sapiens OX=9606 GN=COPA PE=1 SV=2                          |
| sp O43707 ACTN4_HUMAN | HUMAN   | Alpha-actinin-4 OS=Homo sapiens OX=9606 GN=ACTN4 PE=1 SV=2                                |
| sp P13639 EF2_HUMAN   | HUMAN   | Elongation factor 2 OS=Homo sapiens OX=9606 GN=EEF2 PE=1 SV=4                             |
| sp P41252 SYIC_HUMAN  | HUMAN   | Isoleucine--tRNA ligase, cytoplasmic OS=Homo sapiens OX=9606 GN=IARS1 PE=1 SV=2           |
| sp P78371 TCPB_HUMAN  | HUMAN   | T-complex protein 1 subunit beta OS=Homo sapiens OX=9606 GN=CCT2 PE=1 SV=4                |
| sp P26038 MOES_HUMAN  | HUMAN   | Moesin OS=Homo sapiens OX=9606 GN=MSN PE=1 SV=3                                           |
| sp P07814 SYEP_HUMAN  | HUMAN   | Bifunctional glutamate/proline--tRNA ligase OS=Homo sapiens OX=9606 GN=EPRS1 PE=1 SV=5    |
| sp P11142 HSP7C_HUMAN | HUMAN   | Heat shock cognate 71 kDa protein OS=Homo sapiens OX=9606 GN=HSPA8 PE=1 SV=1              |
| sp Q08211 DHX9_HUMAN  | HUMAN   | ATP-dependent RNA helicase A OS=Homo sapiens OX=9606 GN=DHX9 PE=1 SV=4                    |
| sp P35527 K1C9_HUMAN  | HUMAN   | Keratin, type I cytoskeletal 9 OS=Homo sapiens OX=9606 GN=KRT9 PE=1 SV=3                  |
| sp P17987 TCPA_HUMAN  | HUMAN   | T-complex protein 1 subunit alpha OS=Homo sapiens OX=9606 GN=TCP1 PE=1 SV=1               |
| sp P48643 TCPE_HUMAN  | HUMAN   | T-complex protein 1 subunit epsilon OS=Homo sapiens OX=9606 GN=CCT5 PE=1 SV=1             |
| sp P46940 IQGA1_HUMAN | HUMAN   | Ras GTPase-activating-like protein IQGAP1 OS=Homo sapiens OX=9606 GN=IQGAP1 PE=1 SV=1     |
| sp P08575 PTPRC_HUMAN | HUMAN   | Receptor-type tyrosine-protein phosphatase C OS=Homo sapiens OX=9606 GN=PTPRC PE=1 SV=3   |

|                       |       |                                                                                                  |
|-----------------------|-------|--------------------------------------------------------------------------------------------------|
| sp P26640 SYVC_HUMAN  | HUMAN | Valine--tRNA ligase OS=Homo sapiens OX=9606 GN=VAR51 PE=1 SV=4                                   |
| sp P07437 TBB5_HUMAN  | HUMAN | Tubulin beta chain OS=Homo sapiens OX=9606 GN=TUBB PE=1 SV=2                                     |
| sp P13796 PLSL_HUMAN  | HUMAN | Plastin-2 OS=Homo sapiens OX=9606 GN=LCP1 PE=1 SV=6                                              |
| sp P15144 AMPN_HUMAN  | HUMAN | Aminopeptidase N OS=Homo sapiens OX=9606 GN=ANPEP PE=1 SV=4                                      |
| sp P27708 PYR1_HUMAN  | HUMAN | CAD protein OS=Homo sapiens OX=9606 GN=CAD PE=1 SV=3                                             |
| sp O14980 XPO1_HUMAN  | HUMAN | Exportin-1 OS=Homo sapiens OX=9606 GN=XPO1 PE=1 SV=1                                             |
| sp P49368 TCPG_HUMAN  | HUMAN | T-complex protein 1 subunit gamma OS=Homo sapiens OX=9606 GN=CCT3 PE=1 SV=4                      |
| sp Q99832 TCPH_HUMAN  | HUMAN | T-complex protein 1 subunit eta OS=Homo sapiens OX=9606 GN=CCT7 PE=1 SV=2                        |
| sp P50990 TCPQ_HUMAN  | HUMAN | T-complex protein 1 subunit theta OS=Homo sapiens OX=9606 GN=CCT8 PE=1 SV=4                      |
| sp P06737 PYGL_HUMAN  | HUMAN | Glycogen phosphorylase, liver form OS=Homo sapiens OX=9606 GN=PYGL PE=1 SV=4                     |
| sp P12956 XRCC6_HUMAN | HUMAN | X-ray repair cross-complementing protein 6 OS=Homo sapiens OX=9606 GN=XRCC6 PE=1 SV=2            |
| sp P02786 TFR1_HUMAN  | HUMAN | Transferrin receptor protein 1 OS=Homo sapiens OX=9606 GN=TFRC PE=1 SV=2                         |
| sp P00558 PGK1_HUMAN  | HUMAN | Phosphoglycerate kinase 1 OS=Homo sapiens OX=9606 GN=PGK1 PE=1 SV=3                              |
| sp Q9P2J5 SYLC_HUMAN  | HUMAN | Leucine--tRNA ligase, cytoplasmic OS=Homo sapiens OX=9606 GN=LARS1 PE=1 SV=2                     |
| sp P49588 SYAC_HUMAN  | HUMAN | Alanine--tRNA ligase, cytoplasmic OS=Homo sapiens OX=9606 GN=AARS1 PE=1 SV=2                     |
| sp P55072 TERA_HUMAN  | HUMAN | Transitional endoplasmic reticulum ATPase OS=Homo sapiens OX=9606 GN=VCP PE=1 SV=4               |
| sp P13010 XRCC5_HUMAN | HUMAN | X-ray repair cross-complementing protein 5 OS=Homo sapiens OX=9606 GN=XRCC5 PE=1 SV=3            |
| sp Q71U36 TBA1A_HUMAN | HUMAN | Tubulin alpha-1A chain OS=Homo sapiens OX=9606 GN=TUBA1A PE=1 SV=1                               |
| sp P08133 ANXA6_HUMAN | HUMAN | Annexin A6 OS=Homo sapiens OX=9606 GN=ANXA6 PE=1 SV=3                                            |
| sp P08195 4F2_HUMAN   | HUMAN | 4F2 cell-surface antigen heavy chain OS=Homo sapiens OX=9606 GN=SLC3A2 PE=1 SV=3                 |
| sp P05023 AT1A1_HUMAN | HUMAN | Sodium/potassium-transporting ATPase subunit alpha-1 OS=Homo sapiens OX=9606 GN=ATP1A1 PE=1 SV=1 |
| sp B01T2 MYO1G_HUMAN  | HUMAN | Unconventional myosin-Ig OS=Homo sapiens OX=9606 GN=MYO1G PE=1 SV=2                              |
| sp P63261 ACTG_HUMAN  | HUMAN | Actin, cytoplasmic 2 OS=Homo sapiens OX=9606 GN=ACTG1 PE=1 SV=1                                  |
| sp Q14152 EIF3A_HUMAN | HUMAN | Eukaryotic translation initiation factor 3 subunit A OS=Homo sapiens OX=9606 GN=EIF3A PE=1 SV=1  |
| sp P13645 K1C10_HUMAN | HUMAN | Keratin, type I cytoskeletal 10 OS=Homo sapiens OX=9606 GN=KRT10 PE=1 SV=6                       |
| sp P50991 TCPD_HUMAN  | HUMAN | T-complex protein 1 subunit delta OS=Homo sapiens OX=9606 GN=CCT4 PE=1 SV=4                      |
| sp P04439 HLAA_HUMAN  | HUMAN | HLA class I histocompatibility antigen, A alpha chain OS=Homo sapiens OX=9606 GN=HLA-A PE=1 SV=2 |
| sp P14868 SYDC_HUMAN  | HUMAN | Aspartate--tRNA ligase, cytoplasmic OS=Homo sapiens OX=9606 GN=DARS1 PE=1 SV=2                   |
| sp Q16555 DPYL2_HUMAN | HUMAN | Dihydropyrimidinase-related protein 2 OS=Homo sapiens OX=9606 GN=DPYSL2 PE=1 SV=1                |
| sp Q15393 SF3B3_HUMAN | HUMAN | Splicing factor 3B subunit 3 OS=Homo sapiens OX=9606 GN=SF3B3 PE=1 SV=4                          |

|                       |       |                                                                                                 |
|-----------------------|-------|-------------------------------------------------------------------------------------------------|
| sp Q9Y262 EIF3L_HUMAN | HUMAN | Eukaryotic translation initiation factor 3 subunit L OS=Homo sapiens OX=9606 GN=EIF3L PE=1 SV=1 |
| sp P40227 TCPZ_HUMAN  | HUMAN | T-complex protein 1 subunit zeta OS=Homo sapiens OX=9606 GN=CCT6A PE=1 SV=3                     |
| sp P35908 K22E_HUMAN  | HUMAN | Keratin, type II cytoskeletal 2 epidermal OS=Homo sapiens OX=9606 GN=KRT2 PE=1 SV=2             |
| sp P08779 K1C16_HUMAN | HUMAN | Keratin, type I cytoskeletal 16 OS=Homo sapiens OX=9606 GN=KRT16 PE=1 SV=4                      |
| sp O75533 SF3B1_HUMAN | HUMAN | Splicing factor 3B subunit 1 OS=Homo sapiens OX=9606 GN=SF3B1 PE=1 SV=3                         |
| sp P04406 G3P_HUMAN   | HUMAN | Glyceraldehyde-3-phosphate dehydrogenase OS=Homo sapiens OX=9606 GN=GAPDH PE=1 SV=3             |
| sp P33993 MCM7_HUMAN  | HUMAN | DNA replication licensing factor MCM7 OS=Homo sapiens OX=9606 GN=MCM7 PE=1 SV=4                 |
| sp Q86UX7 URP2_HUMAN  | HUMAN | Fermitin family homolog 3 OS=Homo sapiens OX=9606 GN=FERMT3 PE=1 SV=1                           |
| sp Q02880 TOP2B_HUMAN | HUMAN | DNA topoisomerase 2-beta OS=Homo sapiens OX=9606 GN=TOP2B PE=1 SV=3                             |
| sp P23526 SAHH_HUMAN  | HUMAN | Adenosylhomocysteinase OS=Homo sapiens OX=9606 GN=AHCY PE=1 SV=4                                |
| sp P07900 HS90A_HUMAN | HUMAN | Heat shock protein HSP 90-alpha OS=Homo sapiens OX=9606 GN=HSP90AA1 PE=1 SV=5                   |
| sp Q99460 PSMD1_HUMAN | HUMAN | 26S proteasome non-ATPase regulatory subunit 1 OS=Homo sapiens OX=9606 GN=PSMD1 PE=1 SV=2       |
| sp P49736 MCM2_HUMAN  | HUMAN | DNA replication licensing factor MCM2 OS=Homo sapiens OX=9606 GN=MCM2 PE=1 SV=4                 |
| sp P23396 RS3_HUMAN   | HUMAN | 40S ribosomal protein S3 OS=Homo sapiens OX=9606 GN=RPS3 PE=1 SV=2                              |
| sp P61158 ARP3_HUMAN  | HUMAN | Actin-related protein 3 OS=Homo sapiens OX=9606 GN=ACTR3 PE=1 SV=3                              |
| sp P06733 ENOA_HUMAN  | HUMAN | Alpha-enolase OS=Homo sapiens OX=9606 GN=ENO1 PE=1 SV=2                                         |
| sp P41250 GARS_HUMAN  | HUMAN | Glycine--tRNA ligase OS=Homo sapiens OX=9606 GN=GARS1 PE=1 SV=3                                 |
| sp Q8WUM4 PDC6I_HUMAN | HUMAN | Programmed cell death 6-interacting protein OS=Homo sapiens OX=9606 GN=PDCD6IP PE=1 SV=1        |
| sp P63244 RACK1_HUMAN | HUMAN | Receptor of activated protein C kinase 1 OS=Homo sapiens OX=9606 GN=RACK1 PE=1 SV=3             |
| sp P11717 MPRI_HUMAN  | HUMAN | Cation-independent mannose-6-phosphate receptor OS=Homo sapiens OX=9606 GN=IGF2R PE=1 SV=3      |
| sp P05556 ITB1_HUMAN  | HUMAN | Integrin beta-1 OS=Homo sapiens OX=9606 GN=ITGB1 PE=1 SV=2                                      |
| sp P31939 PUR9_HUMAN  | HUMAN | Bifunctional purine biosynthesis protein PURH OS=Homo sapiens OX=9606 GN=ATIC PE=1 SV=3         |
| sp Q9H4A4 AMPB_HUMAN  | HUMAN | Aminopeptidase B OS=Homo sapiens OX=9606 GN=RNPEP PE=1 SV=2                                     |
| sp P60842 IF4A1_HUMAN | HUMAN | Eukaryotic initiation factor 4A-I OS=Homo sapiens OX=9606 GN=EIF4A1 PE=1 SV=1                   |
| sp P33992 MCM5_HUMAN  | HUMAN | DNA replication licensing factor MCM5 OS=Homo sapiens OX=9606 GN=MCM5 PE=1 SV=5                 |
| sp P26641 EF1G_HUMAN  | HUMAN | Elongation factor 1-gamma OS=Homo sapiens OX=9606 GN=EEF1G PE=1 SV=3                            |
| sp P47897 SYQ_HUMAN   | HUMAN | Glutamine--tRNA ligase OS=Homo sapiens OX=9606 GN=QARS1 PE=1 SV=1                               |
| sp O75955 FLOT1_HUMAN | HUMAN | Flotillin-1 OS=Homo sapiens OX=9606 GN=FLOT1 PE=1 SV=3                                          |
| sp Q13200 PSMD2_HUMAN | HUMAN | 26S proteasome non-ATPase regulatory subunit 2 OS=Homo sapiens OX=9606 GN=PSMD2 PE=1 SV=3       |
| sp P53618 COPB_HUMAN  | HUMAN | Coatomer subunit beta OS=Homo sapiens OX=9606 GN=COPB1 PE=1 SV=3                                |
| sp Q14697 GANAB_HUMAN | HUMAN | Neutral alpha-glucosidase AB OS=Homo sapiens OX=9606 GN=GANAB PE=1 SV=3                         |

|                       |       |                                                                                                      |
|-----------------------|-------|------------------------------------------------------------------------------------------------------|
| sp P49591 SYSC_HUMAN  | HUMAN | Serine--tRNA ligase, cytoplasmic OS=Homo sapiens OX=9606 GN=SARS1 PE=1 SV=3                          |
| sp O75643 U520_HUMAN  | HUMAN | U5 small nuclear ribonucleoprotein 200 kDa helicase OS=Homo sapiens OX=9606 GN=SNRNP200 PE=1 SV=2    |
| sp Q14764 MVP_HUMAN   | HUMAN | Major vault protein OS=Homo sapiens OX=9606 GN=MVP PE=1 SV=4                                         |
| sp P0DMV9 HS71B_HUMAN | HUMAN | Heat shock 70 kDa protein 1B OS=Homo sapiens OX=9606 GN=HSPA1B PE=1 SV=1                             |
| sp O43175 SERA_HUMAN  | HUMAN | D-3-phosphoglycerate dehydrogenase OS=Homo sapiens OX=9606 GN=PHGDH PE=1 SV=4                        |
| sp P08311 CATG_HUMAN  | HUMAN | Cathepsin G OS=Homo sapiens OX=9606 GN=CTSG PE=1 SV=2                                                |
| sp P11586 C1TC_HUMAN  | HUMAN | C-1-tetrahydrofolate synthase, cytoplasmic OS=Homo sapiens OX=9606 GN=MTHFD1 PE=1 SV=3               |
| sp P50995 ANX11_HUMAN | HUMAN | Annexin A11 OS=Homo sapiens OX=9606 GN=ANXA11 PE=1 SV=1                                              |
| sp P05107 ITB2_HUMAN  | HUMAN | Integrin beta-2 OS=Homo sapiens OX=9606 GN=ITGB2 PE=1 SV=2                                           |
| sp P21399 ACOC_HUMAN  | HUMAN | Cytoplasmic aconitate hydratase OS=Homo sapiens OX=9606 GN=ACO1 PE=1 SV=3                            |
| sp P68104 EF1A1_HUMAN | HUMAN | Elongation factor 1-alpha 1 OS=Homo sapiens OX=9606 GN=EEF1A1 PE=1 SV=1                              |
| sp P08648 ITA5_HUMAN  | HUMAN | Integrin alpha-5 OS=Homo sapiens OX=9606 GN=ITGA5 PE=1 SV=2                                          |
| sp P04899 GNAI2_HUMAN | HUMAN | Guanine nucleotide-binding protein G(i) subunit alpha-2 OS=Homo sapiens OX=9606 GN=GNAI2 PE=1 SV=3   |
| sp P21333 FLNA_HUMAN  | HUMAN | Filamin-A OS=Homo sapiens OX=9606 GN=FLNA PE=1 SV=4                                                  |
| sp P07355 ANXA2_HUMAN | HUMAN | Annexin A2 OS=Homo sapiens OX=9606 GN=ANXA2 PE=1 SV=2                                                |
| sp O00299 CLIC1_HUMAN | HUMAN | Chloride intracellular channel protein 1 OS=Homo sapiens OX=9606 GN=CLIC1 PE=1 SV=4                  |
| sp P08865 RSSA_HUMAN  | HUMAN | 40S ribosomal protein SA OS=Homo sapiens OX=9606 GN=RPSA PE=1 SV=4                                   |
| sp P23634 AT2B4_HUMAN | HUMAN | Plasma membrane calcium-transporting ATPase 4 OS=Homo sapiens OX=9606 GN=ATP2B4 PE=1 SV=2            |
| sp O75083 WDR1_HUMAN  | HUMAN | WD repeat-containing protein 1 OS=Homo sapiens OX=9606 GN=WDR1 PE=1 SV=4                             |
| sp O75044 SRGP2_HUMAN | HUMAN | SLIT-ROBO Rho GTPase-activating protein 2 OS=Homo sapiens OX=9606 GN=SRGAP2 PE=1 SV=3                |
| sp Q15758 AAAT_HUMAN  | HUMAN | Neutral amino acid transporter B(0) OS=Homo sapiens OX=9606 GN=SLC1A5 PE=1 SV=2                      |
| sp Q14974 IMB1_HUMAN  | HUMAN | Importin subunit beta-1 OS=Homo sapiens OX=9606 GN=KPNB1 PE=1 SV=2                                   |
| sp P17858 PFKAL_HUMAN | HUMAN | ATP-dependent 6-phosphofructokinase, liver type OS=Homo sapiens OX=9606 GN=PFKL PE=1 SV=6            |
| sp P31146 COR1A_HUMAN | HUMAN | Coronin-1A OS=Homo sapiens OX=9606 GN=CORO1A PE=1 SV=4                                               |
| sp P11216 PYGB_HUMAN  | HUMAN | Glycogen phosphorylase, brain form OS=Homo sapiens OX=9606 GN=PYGB PE=1 SV=5                         |
| sp Q7KZF4 SND1_HUMAN  | HUMAN | Staphylococcal nuclease domain-containing protein 1 OS=Homo sapiens OX=9606 GN=SND1 PE=1 SV=1        |
| sp Q9Y230 RUVB2_HUMAN | HUMAN | RuvB-like 2 OS=Homo sapiens OX=9606 GN=RUVBL2 PE=1 SV=3                                              |
| contam_sp TRYP_PIG    |       | contam_sp TRYP_PIG                                                                                   |
| sp P07948 LYN_HUMAN   | HUMAN | Tyrosine-protein kinase Lyn OS=Homo sapiens OX=9606 GN=LYN PE=1 SV=3                                 |
| sp O43143 DHX15_HUMAN | HUMAN | Pre-mRNA-splicing factor ATP-dependent RNA helicase DHX15 OS=Homo sapiens OX=9606 GN=DHX15 PE=1 SV=2 |

|                       |       |                                                                                                            |
|-----------------------|-------|------------------------------------------------------------------------------------------------------------|
| sp P55884 EIF3B_HUMAN | HUMAN | Eukaryotic translation initiation factor 3 subunit B OS=Homo sapiens OX=9606 GN=EIF3B PE=1 SV=3            |
| sp Q01581 HMCS1_HUMAN | HUMAN | Hydroxymethylglutaryl-CoA synthase, cytoplasmic OS=Homo sapiens OX=9606 GN=HMCS1 PE=1 SV=2                 |
| sp Q6WKZ4 RFIP1_HUMAN | HUMAN | Rab11 family-interacting protein 1 OS=Homo sapiens OX=9606 GN=RAB11FIP1 PE=1 SV=3                          |
| sp P06744 G6PI_HUMAN  | HUMAN | Glucose-6-phosphate isomerase OS=Homo sapiens OX=9606 GN=GPI PE=1 SV=4                                     |
| sp O43242 PSMD3_HUMAN | HUMAN | 26S proteasome non-ATPase regulatory subunit 3 OS=Homo sapiens OX=9606 GN=PSMD3 PE=1 SV=2                  |
| sp O14745 NHRF1_HUMAN | HUMAN | Na(+)/H(+) exchange regulatory cofactor NHE-RF1 OS=Homo sapiens OX=9606 GN=SLC9A3R1 PE=1 SV=4              |
| sp Q01518 CAP1_HUMAN  | HUMAN | Adenylyl cyclase-associated protein 1 OS=Homo sapiens OX=9606 GN=CAP1 PE=1 SV=5                            |
| sp P61160 ARP2_HUMAN  | HUMAN | Actin-related protein 2 OS=Homo sapiens OX=9606 GN=ACTR2 PE=1 SV=1                                         |
| sp Q9Y265 RUVB1_HUMAN | HUMAN | RuvB-like 1 OS=Homo sapiens OX=9606 GN=RUVBL1 PE=1 SV=1                                                    |
| sp P23528 COF1_HUMAN  | HUMAN | Cofilin-1 OS=Homo sapiens OX=9606 GN=CFL1 PE=1 SV=3                                                        |
| sp Q96QK1 VPS35_HUMAN | HUMAN | Vacuolar protein sorting-associated protein 35 OS=Homo sapiens OX=9606 GN=VPS35 PE=1 SV=2                  |
| sp Q6P2Q9 PRP8_HUMAN  | HUMAN | Pre-mRNA-processing-splicing factor 8 OS=Homo sapiens OX=9606 GN=PRPF8 PE=1 SV=2                           |
| sp Q9P265 DIP2B_HUMAN | HUMAN | Disco-interacting protein 2 homolog B OS=Homo sapiens OX=9606 GN=DIP2B PE=1 SV=3                           |
| sp O00232 PSD12_HUMAN | HUMAN | 26S proteasome non-ATPase regulatory subunit 12 OS=Homo sapiens OX=9606 GN=PSMD12 PE=1 SV=3                |
| sp P38919 IF4A3_HUMAN | HUMAN | Eukaryotic initiation factor 4A-III OS=Homo sapiens OX=9606 GN=EIF4A3 PE=1 SV=4                            |
| sp Q9Y3I0 RTCB_HUMAN  | HUMAN | RNA-splicing ligase RtcB homolog OS=Homo sapiens OX=9606 GN=RTCB PE=1 SV=1                                 |
| sp P15311 EZRI_HUMAN  | HUMAN | Ezrin OS=Homo sapiens OX=9606 GN=EZR PE=1 SV=4                                                             |
| sp P26639 SYTC_HUMAN  | HUMAN | Threonine--tRNA ligase 1, cytoplasmic OS=Homo sapiens OX=9606 GN=TARS1 PE=1 SV=3                           |
| sp Q15046 SYK_HUMAN   | HUMAN | Lysine--tRNA ligase OS=Homo sapiens OX=9606 GN=KARS1 PE=1 SV=3                                             |
| sp Q9P258 RCC2_HUMAN  | HUMAN | Protein RCC2 OS=Homo sapiens OX=9606 GN=RCC2 PE=1 SV=2                                                     |
| sp P27348 1433T_HUMAN | HUMAN | 14-3-3 protein theta OS=Homo sapiens OX=9606 GN=YWHAQ PE=1 SV=1                                            |
| sp P13612 ITA4_HUMAN  | HUMAN | Integrin alpha-4 OS=Homo sapiens OX=9606 GN=ITGA4 PE=1 SV=3                                                |
| sp P62805 H4_HUMAN    | HUMAN | Histone H4 OS=Homo sapiens OX=9606 GN=H4C1 PE=1 SV=2                                                       |
| sp P62873 GBB1_HUMAN  | HUMAN | Guanine nucleotide-binding protein G(I)/G(S)/G(T) subunit beta-1 OS=Homo sapiens OX=9606 GN=GNB1 PE=1 SV=3 |
| sp P15880 RS2_HUMAN   | HUMAN | 40S ribosomal protein S2 OS=Homo sapiens OX=9606 GN=RPS2 PE=1 SV=2                                         |
| sp P05388 RLA0_HUMAN  | HUMAN | 60S acidic ribosomal protein P0 OS=Homo sapiens OX=9606 GN=RPLP0 PE=1 SV=1                                 |
| sp Q14254 FLOT2_HUMAN | HUMAN | Flotillin-2 OS=Homo sapiens OX=9606 GN=FLOT2 PE=1 SV=2                                                     |
| sp P11387 TOP1_HUMAN  | HUMAN | DNA topoisomerase 1 OS=Homo sapiens OX=9606 GN=TOP1 PE=1 SV=2                                              |
| sp P61026 RAB10_HUMAN | HUMAN | Ras-related protein Rab-10 OS=Homo sapiens OX=9606 GN=RAB10 PE=1 SV=1                                      |
| sp P60228 EIF3E_HUMAN | HUMAN | Eukaryotic translation initiation factor 3 subunit E OS=Homo sapiens OX=9606 GN=EIF3E PE=1 SV=1            |

|                       |       |                                                                                                                                |
|-----------------------|-------|--------------------------------------------------------------------------------------------------------------------------------|
| sp P30153 2AAA_HUMAN  | HUMAN | Serine/threonine-protein phosphatase 2A 65 kDa regulatory subunit A alpha isoform OS=Homo sapiens OX=9606 GN=PPP2R1A PE=1 SV=4 |
| sp Q92841 DDX17_HUMAN | HUMAN | Probable ATP-dependent RNA helicase DDX17 OS=Homo sapiens OX=9606 GN=DDX17 PE=1 SV=2                                           |
| sp Q13263 TIF1B_HUMAN | HUMAN | Transcription intermediary factor 1-beta OS=Homo sapiens OX=9606 GN=TRIM28 PE=1 SV=5                                           |
| sp Q15008 PSMD6_HUMAN | HUMAN | 26S proteasome non-ATPase regulatory subunit 6 OS=Homo sapiens OX=9606 GN=PSMD6 PE=1 SV=1                                      |
| sp P15153 RAC2_HUMAN  | HUMAN | Ras-related C3 botulinum toxin substrate 2 OS=Homo sapiens OX=9606 GN=RAC2 PE=1 SV=1                                           |
| sp P18669 PGAM1_HUMAN | HUMAN | Phosphoglycerate mutase 1 OS=Homo sapiens OX=9606 GN=PGAM1 PE=1 SV=2                                                           |
| sp Q15907 RB11B_HUMAN | HUMAN | Ras-related protein Rab-11B OS=Homo sapiens OX=9606 GN=RAB11B PE=1 SV=4                                                        |
| sp P54920 SNAA_HUMAN  | HUMAN | Alpha-soluble NSF attachment protein OS=Homo sapiens OX=9606 GN=NAPA PE=1 SV=3                                                 |
| sp P01130 LDLR_HUMAN  | HUMAN | Low-density lipoprotein receptor OS=Homo sapiens OX=9606 GN=LDLR PE=1 SV=1                                                     |
| sp P08567 PLEK_HUMAN  | HUMAN | Pleckstrin OS=Homo sapiens OX=9606 GN=PLEK PE=1 SV=3                                                                           |
| sp P01024 CO3_HUMAN   | HUMAN | Complement C3 OS=Homo sapiens OX=9606 GN=C3 PE=1 SV=2                                                                          |
| sp Q16576 RBBP7_HUMAN | HUMAN | Histone-binding protein RBBP7 OS=Homo sapiens OX=9606 GN=RBBP7 PE=1 SV=1                                                       |
| sp P48668 K2C6C_HUMAN | HUMAN | Keratin, type II cytoskeletal 6C OS=Homo sapiens OX=9606 GN=KRT6C PE=1 SV=3                                                    |
| sp Q99873 ANM1_HUMAN  | HUMAN | Protein arginine N-methyltransferase 1 OS=Homo sapiens OX=9606 GN=PRMT1 PE=1 SV=3                                              |
| sp P62937 PPIA_HUMAN  | HUMAN | Peptidyl-prolyl cis-trans isomerase A OS=Homo sapiens OX=9606 GN=PPIA PE=1 SV=2                                                |
| sp P60900 PSA6_HUMAN  | HUMAN | Proteasome subunit alpha type-6 OS=Homo sapiens OX=9606 GN=PSMA6 PE=1 SV=1                                                     |
| sp P35606 COPB2_HUMAN | HUMAN | Coatomer subunit beta' OS=Homo sapiens OX=9606 GN=COPB2 PE=1 SV=2                                                              |
| sp P62195 PRS8_HUMAN  | HUMAN | 26S proteasome regulatory subunit 8 OS=Homo sapiens OX=9606 GN=PSMC5 PE=1 SV=1                                                 |
| sp P62136 PP1A_HUMAN  | HUMAN | Serine/threonine-protein phosphatase PP1-alpha catalytic subunit OS=Homo sapiens OX=9606 GN=PPP1CA PE=1 SV=1                   |
| sp P19367 H XK1_HUMAN | HUMAN | Hexokinase-1 OS=Homo sapiens OX=9606 GN=HK1 PE=1 SV=3                                                                          |
| sp Q9Y696 CLIC4_HUMAN | HUMAN | Chloride intracellular channel protein 4 OS=Homo sapiens OX=9606 GN=CLIC4 PE=1 SV=4                                            |
| sp Q9H4M9 EHD1_HUMAN  | HUMAN | EH domain-containing protein 1 OS=Homo sapiens OX=9606 GN=EHD1 PE=1 SV=2                                                       |
| sp O95782 AP2A1_HUMAN | HUMAN | AP-2 complex subunit alpha-1 OS=Homo sapiens OX=9606 GN=AP2A1 PE=1 SV=3                                                        |
| sp Q9UIA9 XPO7_HUMAN  | HUMAN | Exportin-7 OS=Homo sapiens OX=9606 GN=XPO7 PE=1 SV=3                                                                           |
| sp P51149 RAB7A_HUMAN | HUMAN | Ras-related protein Rab-7a OS=Homo sapiens OX=9606 GN=RAB7A PE=1 SV=1                                                          |
| sp Q7L576 CYFP1_HUMAN | HUMAN | Cytoplasmic FMR1-interacting protein 1 OS=Homo sapiens OX=9606 GN=CYFIP1 PE=1 SV=1                                             |
| sp Q99536 VAT1_HUMAN  | HUMAN | Synaptic vesicle membrane protein VAT-1 homolog OS=Homo sapiens OX=9606 GN=VAT1 PE=1 SV=2                                      |
| sp P09211 GSTP1_HUMAN | HUMAN | Glutathione S-transferase P OS=Homo sapiens OX=9606 GN=GSTP1 PE=1 SV=2                                                         |
| sp P50395 GDI2_HUMAN  | HUMAN | Rab GDP dissociation inhibitor beta OS=Homo sapiens OX=9606 GN=GDI2 PE=1 SV=2                                                  |
| sp P48960 CD97_HUMAN  | HUMAN | CD97 antigen OS=Homo sapiens OX=9606 GN=CD97 PE=1 SV=4                                                                         |

|                       |       |                                                                                                            |
|-----------------------|-------|------------------------------------------------------------------------------------------------------------|
| sp O43776 SYNC_HUMAN  | HUMAN | Asparagine--tRNA ligase, cytoplasmic OS=Homo sapiens OX=9606 GN=NARS1 PE=1 SV=1                            |
| sp Q13838 DX39B_HUMAN | HUMAN | Spliceosome RNA helicase DDX39B OS=Homo sapiens OX=9606 GN=DDX39B PE=1 SV=1                                |
| sp P41091 IF2G_HUMAN  | HUMAN | Eukaryotic translation initiation factor 2 subunit 3 OS=Homo sapiens OX=9606 GN=EIF2S3 PE=1 SV=3           |
| sp P62826 RAN_HUMAN   | HUMAN | GTP-binding nuclear protein Ran OS=Homo sapiens OX=9606 GN=RAN PE=1 SV=3                                   |
| sp P55209 NP1L1_HUMAN | HUMAN | Nucleosome assembly protein 1-like 1 OS=Homo sapiens OX=9606 GN=NAP1L1 PE=1 SV=1                           |
| sp P46781 RS9_HUMAN   | HUMAN | 40S ribosomal protein S9 OS=Homo sapiens OX=9606 GN=RPS9 PE=1 SV=3                                         |
| sp P18124 RL7_HUMAN   | HUMAN | 60S ribosomal protein L7 OS=Homo sapiens OX=9606 GN=RPL7 PE=1 SV=1                                         |
| sp P36871 PGM1_HUMAN  | HUMAN | Phosphoglucomutase-1 OS=Homo sapiens OX=9606 GN=PGM1 PE=1 SV=3                                             |
| sp P16284 PECA1_HUMAN | HUMAN | Platelet endothelial cell adhesion molecule OS=Homo sapiens OX=9606 GN=PECAM1 PE=1 SV=2                    |
| sp Q6FI13 H2A2A_HUMAN | HUMAN | Histone H2A type 2-A OS=Homo sapiens OX=9606 GN=HIST2H2AA3 PE=1 SV=3                                       |
| sp P14625 ENPL_HUMAN  | HUMAN | Endoplasmin OS=Homo sapiens OX=9606 GN=HSP90B1 PE=1 SV=1                                                   |
| sp O96019 ACL6A_HUMAN | HUMAN | Actin-like protein 6A OS=Homo sapiens OX=9606 GN=ACTL6A PE=1 SV=1                                          |
| sp Q9UPT5 EXOC7_HUMAN | HUMAN | Exocyst complex component 7 OS=Homo sapiens OX=9606 GN=EXOC7 PE=1 SV=3                                     |
| sp P06576 ATPB_HUMAN  | HUMAN | ATP synthase subunit beta, mitochondrial OS=Homo sapiens OX=9606 GN=ATP5F1B PE=1 SV=3                      |
| sp Q9BXJ9 NAA15_HUMAN | HUMAN | N-alpha-acetyltransferase 15, NatA auxiliary subunit OS=Homo sapiens OX=9606 GN=NAA15 PE=1 SV=1            |
| sp P07237 PDIA1_HUMAN | HUMAN | Protein disulfide-isomerase OS=Homo sapiens OX=9606 GN=P4HB PE=1 SV=3                                      |
| sp Q9NSD9 SYFB_HUMAN  | HUMAN | Phenylalanine--tRNA ligase beta subunit OS=Homo sapiens OX=9606 GN=FARSB PE=1 SV=3                         |
| sp O00303 EIF3F_HUMAN | HUMAN | Eukaryotic translation initiation factor 3 subunit F OS=Homo sapiens OX=9606 GN=EIF3F PE=1 SV=1            |
| sp P50570 DYN2_HUMAN  | HUMAN | Dynamin-2 OS=Homo sapiens OX=9606 GN=DNM2 PE=1 SV=2                                                        |
| sp P00338 LDHA_HUMAN  | HUMAN | L-lactate dehydrogenase A chain OS=Homo sapiens OX=9606 GN=LDHA PE=1 SV=2                                  |
| sp P54136 SYRC_HUMAN  | HUMAN | Arginine--tRNA ligase, cytoplasmic OS=Homo sapiens OX=9606 GN=RARS1 PE=1 SV=2                              |
| sp Q15029 U5S1_HUMAN  | HUMAN | 116 kDa U5 small nuclear ribonucleoprotein component OS=Homo sapiens OX=9606 GN=EFTUD2 PE=1 SV=1           |
| sp P62241 RS8_HUMAN   | HUMAN | 40S ribosomal protein S8 OS=Homo sapiens OX=9606 GN=RPS8 PE=1 SV=2                                         |
| sp P52209 6PGD_HUMAN  | HUMAN | 6-phosphogluconate dehydrogenase, decarboxylating OS=Homo sapiens OX=9606 GN=PGD PE=1 SV=3                 |
| sp P34896 GLYC_HUMAN  | HUMAN | Serine hydroxymethyltransferase, cytosolic OS=Homo sapiens OX=9606 GN=SHMT1 PE=1 SV=1                      |
| sp P55786 PSA_HUMAN   | HUMAN | Puromycin-sensitive aminopeptidase OS=Homo sapiens OX=9606 GN=NPEPPS PE=1 SV=2                             |
| sp P43686 PRS6B_HUMAN | HUMAN | 26S proteasome regulatory subunit 6B OS=Homo sapiens OX=9606 GN=PSMC4 PE=1 SV=2                            |
| sp O14672 ADA10_HUMAN | HUMAN | Disintegrin and metalloproteinase domain-containing protein 10 OS=Homo sapiens OX=9606 GN=ADAM10 PE=1 SV=1 |
| sp P55060 XPO2_HUMAN  | HUMAN | Exportin-2 OS=Homo sapiens OX=9606 GN=CSE1L PE=1 SV=3                                                      |
| sp Q9UMS4 PRP19_HUMAN | HUMAN | Pre-mRNA-processing factor 19 OS=Homo sapiens OX=9606 GN=PRPF19 PE=1 SV=1                                  |

|                       |       |                                                                                                                     |
|-----------------------|-------|---------------------------------------------------------------------------------------------------------------------|
| sp P67775 PP2AA_HUMAN | HUMAN | Serine/threonine-protein phosphatase 2A catalytic subunit alpha isoform OS=Homo sapiens OX=9606 GN=PPP2CA PE=1 SV=1 |
| sp P62701 RS4X_HUMAN  | HUMAN | 40S ribosomal protein S4, X isoform OS=Homo sapiens OX=9606 GN=RPS4X PE=1 SV=2                                      |
| sp P27105 STOM_HUMAN  | HUMAN | Erythrocyte band 7 integral membrane protein OS=Homo sapiens OX=9606 GN=STOM PE=1 SV=3                              |
| sp P17980 PRS6A_HUMAN | HUMAN | 26S proteasome regulatory subunit 6A OS=Homo sapiens OX=9606 GN=PSMC3 PE=1 SV=3                                     |
| sp P35613 BASI_HUMAN  | HUMAN | Basigin OS=Homo sapiens OX=9606 GN=BSG PE=1 SV=2                                                                    |
| sp P61224 RAP1B_HUMAN | HUMAN | Ras-related protein Rap-1b OS=Homo sapiens OX=9606 GN=RAP1B PE=1 SV=1                                               |
| sp Q99613 EIF3C_HUMAN | HUMAN | Eukaryotic translation initiation factor 3 subunit C OS=Homo sapiens OX=9606 GN=EIF3C PE=1 SV=1                     |
| sp P46777 RL5_HUMAN   | HUMAN | 60S ribosomal protein L5 OS=Homo sapiens OX=9606 GN=RPL5 PE=1 SV=3                                                  |
| sp O43488 ARK72_HUMAN | HUMAN | Aflatoxin B1 aldehyde reductase member 2 OS=Homo sapiens OX=9606 GN=AKR7A2 PE=1 SV=3                                |
| sp P38606 VATA_HUMAN  | HUMAN | V-type proton ATPase catalytic subunit A OS=Homo sapiens OX=9606 GN=ATP6V1A PE=1 SV=2                               |
| sp Q14566 MCM6_HUMAN  | HUMAN | DNA replication licensing factor MCM6 OS=Homo sapiens OX=9606 GN=MCM6 PE=1 SV=1                                     |
| sp Q99880 H2B1L_HUMAN | HUMAN | Histone H2B type 1-L OS=Homo sapiens OX=9606 GN=H2BC13 PE=1 SV=3                                                    |
| sp Q9UNM6 PSD13_HUMAN | HUMAN | 26S proteasome non-ATPase regulatory subunit 13 OS=Homo sapiens OX=9606 GN=PSMD13 PE=1 SV=2                         |
| sp O14818 PSA7_HUMAN  | HUMAN | Proteasome subunit alpha type-7 OS=Homo sapiens OX=9606 GN=PSMA7 PE=1 SV=1                                          |
| sp Q9UQ80 PA2G4_HUMAN | HUMAN | Proliferation-associated protein 2G4 OS=Homo sapiens OX=9606 GN=PA2G4 PE=1 SV=3                                     |
| sp P39023 RL3_HUMAN   | HUMAN | 60S ribosomal protein L3 OS=Homo sapiens OX=9606 GN=RPL3 PE=1 SV=2                                                  |
| sp P04075 ALDOA_HUMAN | HUMAN | Fructose-bisphosphate aldolase A OS=Homo sapiens OX=9606 GN=ALDOA PE=1 SV=2                                         |
| sp P63104 1433Z_HUMAN | HUMAN | 14-3-3 protein zeta/delta OS=Homo sapiens OX=9606 GN=YWHAZ PE=1 SV=1                                                |
| sp Q9Y285 SYFA_HUMAN  | HUMAN | Phenylalanine--tRNA ligase alpha subunit OS=Homo sapiens OX=9606 GN=FARSA PE=1 SV=3                                 |
| sp P00966 ASSY_HUMAN  | HUMAN | Argininosuccinate synthase OS=Homo sapiens OX=9606 GN=ASS1 PE=1 SV=2                                                |
| sp P20702 ITAX_HUMAN  | HUMAN | Integrin alpha-X OS=Homo sapiens OX=9606 GN=ITGAX PE=1 SV=3                                                         |
| sp P61586 RHOA_HUMAN  | HUMAN | Transforming protein RhoA OS=Homo sapiens OX=9606 GN=RHOA PE=1 SV=1                                                 |
| sp P25098 ARBK1_HUMAN | HUMAN | Beta-adrenergic receptor kinase 1 OS=Homo sapiens OX=9606 GN=GRK2 PE=1 SV=2                                         |
| sp Q9Y3F4 STRAP_HUMAN | HUMAN | Serine-threonine kinase receptor-associated protein OS=Homo sapiens OX=9606 GN=STRAP PE=1 SV=1                      |
| sp P84077 ARF1_HUMAN  | HUMAN | ADP-ribosylation factor 1 OS=Homo sapiens OX=9606 GN=ARF1 PE=1 SV=2                                                 |
| sp P62424 RL7A_HUMAN  | HUMAN | 60S ribosomal protein L7a OS=Homo sapiens OX=9606 GN=RPL7A PE=1 SV=2                                                |
| sp P54577 SYYC_HUMAN  | HUMAN | Tyrosine--tRNA ligase, cytoplasmic OS=Homo sapiens OX=9606 GN=YARS1 PE=1 SV=4                                       |
| sp P56192 SYMC_HUMAN  | HUMAN | Methionine--tRNA ligase, cytoplasmic OS=Homo sapiens OX=9606 GN=MARS1 PE=1 SV=2                                     |
| sp Q9NPY3 C1QR1_HUMAN | HUMAN | Complement component C1q receptor OS=Homo sapiens OX=9606 GN=CD93 PE=1 SV=3                                         |
| sp Q14166 TTL12_HUMAN | HUMAN | Tubulin--tyrosine ligase-like protein 12 OS=Homo sapiens OX=9606 GN=TTLL12 PE=1 SV=2                                |

|                       |       |                                                                                                                                |
|-----------------------|-------|--------------------------------------------------------------------------------------------------------------------------------|
| sp P62249 RS16_HUMAN  | HUMAN | 40S ribosomal protein S16 OS=Homo sapiens OX=9606 GN=RPS16 PE=1 SV=2                                                           |
| sp Q01813 PFKAP_HUMAN | HUMAN | ATP-dependent 6-phosphofructokinase, platelet type OS=Homo sapiens OX=9606 GN=PFKP PE=1 SV=2                                   |
| sp P01023 A2MG_HUMAN  | HUMAN | Alpha-2-macroglobulin OS=Homo sapiens OX=9606 GN=A2M PE=1 SV=3                                                                 |
| sp P61221 ABCE1_HUMAN | HUMAN | ATP-binding cassette sub-family E member 1 OS=Homo sapiens OX=9606 GN=ABCE1 PE=1 SV=1                                          |
| sp P63151 2ABA_HUMAN  | HUMAN | Serine/threonine-protein phosphatase 2A 55 kDa regulatory subunit B alpha isoform OS=Homo sapiens OX=9606 GN=PPP2R2A PE=1 SV=1 |
| sp P60660 MYL6_HUMAN  | HUMAN | Myosin light polypeptide 6 OS=Homo sapiens OX=9606 GN=MYL6 PE=1 SV=2                                                           |
| sp P62333 PRS10_HUMAN | HUMAN | 26S proteasome regulatory subunit 10B OS=Homo sapiens OX=9606 GN=PSMC6 PE=1 SV=1                                               |
| sp P43007 SATT_HUMAN  | HUMAN | Neutral amino acid transporter A OS=Homo sapiens OX=9606 GN=SLC1A4 PE=1 SV=1                                                   |
| sp P61019 RAB2A_HUMAN | HUMAN | Ras-related protein Rab-2A OS=Homo sapiens OX=9606 GN=RAB2A PE=1 SV=1                                                          |
| sp Q93008 USP9X_HUMAN | HUMAN | Probable ubiquitin carboxyl-terminal hydrolase FAF-X OS=Homo sapiens OX=9606 GN=USP9X PE=1 SV=3                                |
| sp P07737 PROF1_HUMAN | HUMAN | Profilin-1 OS=Homo sapiens OX=9606 GN=PFN1 PE=1 SV=2                                                                           |
| sp P52907 CAZA1_HUMAN | HUMAN | F-actin-capping protein subunit alpha-1 OS=Homo sapiens OX=9606 GN=CAPZA1 PE=1 SV=3                                            |
| sp P10321 HLAC_HUMAN  | HUMAN | HLA class I histocompatibility antigen, C alpha chain OS=Homo sapiens OX=9606 GN=HLA-C PE=1 SV=3                               |
| sp P51148 RAB5C_HUMAN | HUMAN | Ras-related protein Rab-5C OS=Homo sapiens OX=9606 GN=RAB5C PE=1 SV=2                                                          |
| sp P69905 HBA_HUMAN   | HUMAN | Hemoglobin subunit alpha OS=Homo sapiens OX=9606 GN=HBA1 PE=1 SV=2                                                             |
| sp P27701 CD82_HUMAN  | HUMAN | CD82 antigen OS=Homo sapiens OX=9606 GN=CD82 PE=1 SV=1                                                                         |
| sp P11234 RALB_HUMAN  | HUMAN | Ras-related protein Ral-B OS=Homo sapiens OX=9606 GN=RALB PE=1 SV=1                                                            |
| sp Q86VP6 CAND1_HUMAN | HUMAN | Cullin-associated NEDD8-dissociated protein 1 OS=Homo sapiens OX=9606 GN=CAND1 PE=1 SV=2                                       |
| sp Q9BUF5 TBB6_HUMAN  | HUMAN | Tubulin beta-6 chain OS=Homo sapiens OX=9606 GN=TUBB6 PE=1 SV=1                                                                |
| sp O43592 XPOT_HUMAN  | HUMAN | Exportin-T OS=Homo sapiens OX=9606 GN=XPOT PE=1 SV=2                                                                           |
| sp P12259 FA5_HUMAN   | HUMAN | Coagulation factor V OS=Homo sapiens OX=9606 GN=F5 PE=1 SV=4                                                                   |
| sp P30419 NMT1_HUMAN  | HUMAN | Glycylpeptide N-tetradecanoyltransferase 1 OS=Homo sapiens OX=9606 GN=NMT1 PE=1 SV=2                                           |
| sp Q06830 PRDX1_HUMAN | HUMAN | Peroxiredoxin-1 OS=Homo sapiens OX=9606 GN=PRDX1 PE=1 SV=1                                                                     |
| sp P20618 PSB1_HUMAN  | HUMAN | Proteasome subunit beta type-1 OS=Homo sapiens OX=9606 GN=PSMB1 PE=1 SV=2                                                      |
| sp P60174 TPIS_HUMAN  | HUMAN | Triosephosphate isomerase OS=Homo sapiens OX=9606 GN=TPI1 PE=1 SV=3                                                            |
| sp Q13347 EIF3I_HUMAN | HUMAN | Eukaryotic translation initiation factor 3 subunit I OS=Homo sapiens OX=9606 GN=EIF3I PE=1 SV=1                                |
| sp P13647 K2C5_HUMAN  | HUMAN | Keratin, type II cytoskeletal 5 OS=Homo sapiens OX=9606 GN=KRT5 PE=1 SV=3                                                      |
| sp O00410 IPO5_HUMAN  | HUMAN | Importin-5 OS=Homo sapiens OX=9606 GN=IPO5 PE=1 SV=4                                                                           |
| sp Q5JWF2 GNAS1_HUMAN | HUMAN | Guanine nucleotide-binding protein G(s) subunit alpha isoforms XLas OS=Homo sapiens OX=9606 GN=GNAS PE=1 SV=2                  |
| sp P37802 TAGL2_HUMAN | HUMAN | Transgelin-2 OS=Homo sapiens OX=9606 GN=TAGLN2 PE=1 SV=3                                                                       |

|                       |       |                                                                                                  |
|-----------------------|-------|--------------------------------------------------------------------------------------------------|
| sp P25788 PSA3_HUMAN  | HUMAN | Proteasome subunit alpha type-3 OS=Homo sapiens OX=9606 GN=PSMA3 PE=1 SV=2                       |
| sp P63010 AP2B1_HUMAN | HUMAN | AP-2 complex subunit beta OS=Homo sapiens OX=9606 GN=AP2B1 PE=1 SV=1                             |
| sp P25205 MCM3_HUMAN  | HUMAN | DNA replication licensing factor MCM3 OS=Homo sapiens OX=9606 GN=MCM3 PE=1 SV=3                  |
| sp O43684 BUB3_HUMAN  | HUMAN | Mitotic checkpoint protein BUB3 OS=Homo sapiens OX=9606 GN=BUB3 PE=1 SV=1                        |
| sp P62979 RS27A_HUMAN | HUMAN | Ubiquitin-40S ribosomal protein S27a OS=Homo sapiens OX=9606 GN=RPS27A PE=1 SV=2                 |
| sp P16402 H13_HUMAN   | HUMAN | Histone H1.3 OS=Homo sapiens OX=9606 GN=H1-3 PE=1 SV=2                                           |
| sp P12814 ACTN1_HUMAN | HUMAN | Alpha-actinin-1 OS=Homo sapiens OX=9606 GN=ACTN1 PE=1 SV=2                                       |
| sp P19105 ML12A_HUMAN | HUMAN | Myosin regulatory light chain 12A OS=Homo sapiens OX=9606 GN=MYL12A PE=1 SV=2                    |
| sp P05362 ICAM1_HUMAN | HUMAN | Intercellular adhesion molecule 1 OS=Homo sapiens OX=9606 GN=ICAM1 PE=1 SV=2                     |
| sp P11413 G6PD_HUMAN  | HUMAN | Glucose-6-phosphate 1-dehydrogenase OS=Homo sapiens OX=9606 GN=G6PD PE=1 SV=4                    |
| sp Q96KP1 EXOC2_HUMAN | HUMAN | Exocyst complex component 2 OS=Homo sapiens OX=9606 GN=EXOC2 PE=1 SV=1                           |
| sp Q8NG11 TSN14_HUMAN | HUMAN | Tetraspanin-14 OS=Homo sapiens OX=9606 GN=TSPAN14 PE=1 SV=1                                      |
| sp P49189 AL9A1_HUMAN | HUMAN | 4-trimethylaminobutyraldehyde dehydrogenase OS=Homo sapiens OX=9606 GN=ALDH9A1 PE=1 SV=3         |
| sp Q8IZ83 A16A1_HUMAN | HUMAN | Aldehyde dehydrogenase family 16 member A1 OS=Homo sapiens OX=9606 GN=ALDH16A1 PE=1 SV=2         |
| sp O75340 PDCD6_HUMAN | HUMAN | Programmed cell death protein 6 OS=Homo sapiens OX=9606 GN=PDCD6 PE=1 SV=1                       |
| sp P19623 SPEE_HUMAN  | HUMAN | Spermidine synthase OS=Homo sapiens OX=9606 GN=SRM PE=1 SV=1                                     |
| sp P00734 THRB_HUMAN  | HUMAN | Prothrombin OS=Homo sapiens OX=9606 GN=F2 PE=1 SV=2                                              |
| sp O00429 DNM1L_HUMAN | HUMAN | Dynamin-1-like protein OS=Homo sapiens OX=9606 GN=DNM1L PE=1 SV=2                                |
| sp P36578 RL4_HUMAN   | HUMAN | 60S ribosomal protein L4 OS=Homo sapiens OX=9606 GN=RPL4 PE=1 SV=5                               |
| sp P22392 NDKB_HUMAN  | HUMAN | Nucleoside diphosphate kinase B OS=Homo sapiens OX=9606 GN=NME2 PE=1 SV=1                        |
| sp P11388 TOP2A_HUMAN | HUMAN | DNA topoisomerase 2-alpha OS=Homo sapiens OX=9606 GN=TOP2A PE=1 SV=3                             |
| sp P61163 ACTZ_HUMAN  | HUMAN | Alpha-centractin OS=Homo sapiens OX=9606 GN=ACTR1A PE=1 SV=1                                     |
| sp Q9P2B2 FPRP_HUMAN  | HUMAN | Prostaglandin F2 receptor negative regulator OS=Homo sapiens OX=9606 GN=PTGFRN PE=1 SV=2         |
| sp Q02790 FKBP4_HUMAN | HUMAN | Peptidyl-prolyl cis-trans isomerase FKBP4 OS=Homo sapiens OX=9606 GN=FKBP4 PE=1 SV=3             |
| sp P00491 PNPH_HUMAN  | HUMAN | Purine nucleoside phosphorylase OS=Homo sapiens OX=9606 GN=PNP PE=1 SV=2                         |
| sp P05198 IF2A_HUMAN  | HUMAN | Eukaryotic translation initiation factor 2 subunit 1 OS=Homo sapiens OX=9606 GN=EIF2S1 PE=1 SV=3 |
| sp Q15435 PP1R7_HUMAN | HUMAN | Protein phosphatase 1 regulatory subunit 7 OS=Homo sapiens OX=9606 GN=PPP1R7 PE=1 SV=1           |
| sp P46459 NSF_HUMAN   | HUMAN | Vesicle-fusing ATPase OS=Homo sapiens OX=9606 GN=NSF PE=1 SV=3                                   |
| sp P30050 RL12_HUMAN  | HUMAN | 60S ribosomal protein L12 OS=Homo sapiens OX=9606 GN=RPL12 PE=1 SV=1                             |
| sp P21281 VATB2_HUMAN | HUMAN | V-type proton ATPase subunit B, brain isoform OS=Homo sapiens OX=9606 GN=ATP6V1B2 PE=1 SV=3      |
| sp P52566 GDIR2_HUMAN | HUMAN | Rho GDP-dissociation inhibitor 2 OS=Homo sapiens OX=9606 GN=ARHGDIB PE=1 SV=3                    |

|                        |       |                                                                                                       |
|------------------------|-------|-------------------------------------------------------------------------------------------------------|
| sp Q8IYI6 EXOC8_HUMAN  | HUMAN | Exocyst complex component 8 OS=Homo sapiens OX=9606 GN=EXOC8 PE=1 SV=2                                |
| sp P28066 PSA5_HUMAN   | HUMAN | Proteasome subunit alpha type-5 OS=Homo sapiens OX=9606 GN=PSMA5 PE=1 SV=3                            |
| sp P02533 K1C14_HUMAN  | HUMAN | Keratin, type I cytoskeletal 14 OS=Homo sapiens OX=9606 GN=KRT14 PE=1 SV=4                            |
| sp P10909 CLUS_HUMAN   | HUMAN | Clusterin OS=Homo sapiens OX=9606 GN=CLU PE=1 SV=1                                                    |
| sp Q14956 GPNMB_HUMAN  | HUMAN | Transmembrane glycoprotein NMB OS=Homo sapiens OX=9606 GN=GPNMB PE=1 SV=2                             |
| sp P53999 TCP4_HUMAN   | HUMAN | Activated RNA polymerase II transcriptional coactivator p15 OS=Homo sapiens OX=9606 GN=SUB1 PE=1 SV=3 |
| sp P34932 HSP74_HUMAN  | HUMAN | Heat shock 70 kDa protein 4 OS=Homo sapiens OX=9606 GN=HSPA4 PE=1 SV=4                                |
| sp P62888 RL30_HUMAN   | HUMAN | 60S ribosomal protein L30 OS=Homo sapiens OX=9606 GN=RPL30 PE=1 SV=2                                  |
| sp O00487 PSDE_HUMAN   | HUMAN | 26S proteasome non-ATPase regulatory subunit 14 OS=Homo sapiens OX=9606 GN=PSMD14 PE=1 SV=1           |
| sp O00231 PSD11_HUMAN  | HUMAN | 26S proteasome non-ATPase regulatory subunit 11 OS=Homo sapiens OX=9606 GN=PSMD11 PE=1 SV=3           |
| sp O60645 EXOC3_HUMAN  | HUMAN | Exocyst complex component 3 OS=Homo sapiens OX=9606 GN=EXOC3 PE=1 SV=3                                |
| sp P04792 HSPB1_HUMAN  | HUMAN | Heat shock protein beta-1 OS=Homo sapiens OX=9606 GN=HSPB1 PE=1 SV=2                                  |
| sp P62277 RS13_HUMAN   | HUMAN | 40S ribosomal protein S13 OS=Homo sapiens OX=9606 GN=RPS13 PE=1 SV=2                                  |
| sp P10768 ESTD_HUMAN   | HUMAN | S-formylglutathione hydrolase OS=Homo sapiens OX=9606 GN=ESD PE=1 SV=2                                |
| sp Q14344 GNA13_HUMAN  | HUMAN | Guanine nucleotide-binding protein subunit alpha-13 OS=Homo sapiens OX=9606 GN=GNA13 PE=1 SV=2        |
| sp P25786 PSA1_HUMAN   | HUMAN | Proteasome subunit alpha type-1 OS=Homo sapiens OX=9606 GN=PSMA1 PE=1 SV=1                            |
| sp P55263 ADK_HUMAN    | HUMAN | Adenosine kinase OS=Homo sapiens OX=9606 GN=ADK PE=1 SV=2                                             |
| sp Q15233 NONO_HUMAN   | HUMAN | Non-POU domain-containing octamer-binding protein OS=Homo sapiens OX=9606 GN=NONO PE=1 SV=4           |
| sp P62316 SMD2_HUMAN   | HUMAN | Small nuclear ribonucleoprotein Sm D2 OS=Homo sapiens OX=9606 GN=SNRPD2 PE=1 SV=1                     |
| sp P68366 TBA4A_HUMAN  | HUMAN | Tubulin alpha-4A chain OS=Homo sapiens OX=9606 GN=TUBA4A PE=1 SV=1                                    |
| sp P20701 ITAL_HUMAN   | HUMAN | Integrin alpha-L OS=Homo sapiens OX=9606 GN=ITGAL PE=1 SV=3                                           |
| sp P04083 ANXA1_HUMAN  | HUMAN | Annexin A1 OS=Homo sapiens OX=9606 GN=ANXA1 PE=1 SV=2                                                 |
| sp P26373 RL13_HUMAN   | HUMAN | 60S ribosomal protein L13 OS=Homo sapiens OX=9606 GN=RPL13 PE=1 SV=4                                  |
| sp P20073 ANXA7_HUMAN  | HUMAN | Annexin A7 OS=Homo sapiens OX=9606 GN=ANXA7 PE=1 SV=3                                                 |
| sp O14828 SCAMP3_HUMAN | HUMAN | Secretory carrier-associated membrane protein 3 OS=Homo sapiens OX=9606 GN=SCAMP3 PE=1 SV=3           |
| sp O15144 ARPC2_HUMAN  | HUMAN | Actin-related protein 2/3 complex subunit 2 OS=Homo sapiens OX=9606 GN=ARPC2 PE=1 SV=1                |
| sp P09525 ANXA4_HUMAN  | HUMAN | Annexin A4 OS=Homo sapiens OX=9606 GN=ANXA4 PE=1 SV=4                                                 |
| sp P33991 MCM4_HUMAN   | HUMAN | DNA replication licensing factor MCM4 OS=Homo sapiens OX=9606 GN=MCM4 PE=1 SV=5                       |
| sp P16070 CD44_HUMAN   | HUMAN | CD44 antigen OS=Homo sapiens OX=9606 GN=CD44 PE=1 SV=3                                                |
| sp P61978 HNRPK_HUMAN  | HUMAN | Heterogeneous nuclear ribonucleoprotein K OS=Homo sapiens OX=9606 GN=HNRNPK PE=1 SV=1                 |

|                       |       |                                                                                                 |
|-----------------------|-------|-------------------------------------------------------------------------------------------------|
| sp Q99829 CPNE1_HUMAN | HUMAN | Copine-1 OS=Homo sapiens OX=9606 GN=CPNE1 PE=1 SV=1                                             |
| sp P01111 RASN_HUMAN  | HUMAN | GTPase NRas OS=Homo sapiens OX=9606 GN=NRAS PE=1 SV=1                                           |
| sp P36955 PEDF_HUMAN  | HUMAN | Pigment epithelium-derived factor OS=Homo sapiens OX=9606 GN=SERPINF1 PE=1 SV=4                 |
| sp P35998 PRS7_HUMAN  | HUMAN | 26S proteasome regulatory subunit 7 OS=Homo sapiens OX=9606 GN=PSMC2 PE=1 SV=3                  |
| sp Q9ULV4 COR1C_HUMAN | HUMAN | Coronin-1C OS=Homo sapiens OX=9606 GN=CORO1C PE=1 SV=1                                          |
| sp Q9BWD1 THIC_HUMAN  | HUMAN | Acetyl-CoA acetyltransferase, cytosolic OS=Homo sapiens OX=9606 GN=ACAT2 PE=1 SV=2              |
| sp P67809 YBOX1_HUMAN | HUMAN | Y-box-binding protein 1 OS=Homo sapiens OX=9606 GN=YBX1 PE=1 SV=3                               |
| sp P61106 RAB14_HUMAN | HUMAN | Ras-related protein Rab-14 OS=Homo sapiens OX=9606 GN=RAB14 PE=1 SV=4                           |
| sp Q09666 AHNK_HUMAN  | HUMAN | Neuroblast differentiation-associated protein AHNK OS=Homo sapiens OX=9606 GN=AHNAK PE=1 SV=2   |
| sp O00154 BACH_HUMAN  | HUMAN | Cytosolic acyl coenzyme A thioester hydrolase OS=Homo sapiens OX=9606 GN=ACOT7 PE=1 SV=3        |
| sp Q92769 HDAC2_HUMAN | HUMAN | Histone deacetylase 2 OS=Homo sapiens OX=9606 GN=HDAC2 PE=1 SV=2                                |
| sp P20340 RAB6A_HUMAN | HUMAN | Ras-related protein Rab-6A OS=Homo sapiens OX=9606 GN=RAB6A PE=1 SV=3                           |
| sp P59998 ARPC4_HUMAN | HUMAN | Actin-related protein 2/3 complex subunit 4 OS=Homo sapiens OX=9606 GN=ARPC4 PE=1 SV=3          |
| sp P62314 SMD1_HUMAN  | HUMAN | Small nuclear ribonucleoprotein Sm D1 OS=Homo sapiens OX=9606 GN=SNRPD1 PE=1 SV=1               |
| sp Q13418 ILK_HUMAN   | HUMAN | Integrin-linked protein kinase OS=Homo sapiens OX=9606 GN=ILK PE=1 SV=2                         |
| sp P22102 PUR2_HUMAN  | HUMAN | Trifunctional purine biosynthetic protein adenosine-3 OS=Homo sapiens OX=9606 GN=GART PE=1 SV=1 |
| sp P17655 CAN2_HUMAN  | HUMAN | Calpain-2 catalytic subunit OS=Homo sapiens OX=9606 GN=CAPN2 PE=1 SV=6                          |
| sp P28482 MK01_HUMAN  | HUMAN | Mitogen-activated protein kinase 1 OS=Homo sapiens OX=9606 GN=MAPK1 PE=1 SV=3                   |
| sp O00471 EXOC5_HUMAN | HUMAN | Exocyst complex component 5 OS=Homo sapiens OX=9606 GN=EXOC5 PE=1 SV=1                          |
| sp Q5VW32 BROX_HUMAN  | HUMAN | BRO1 domain-containing protein BROX OS=Homo sapiens OX=9606 GN=BROX PE=1 SV=1                   |
| sp Q96SB4 SRPK1_HUMAN | HUMAN | SRSF protein kinase 1 OS=Homo sapiens OX=9606 GN=SRPK1 PE=1 SV=2                                |
| sp Q6UWD8 CP054_HUMAN | HUMAN | Transmembrane protein C16orf54 OS=Homo sapiens OX=9606 GN=C16orf54 PE=1 SV=1                    |
| sp P61006 RAB8A_HUMAN | HUMAN | Ras-related protein Rab-8A OS=Homo sapiens OX=9606 GN=RAB8A PE=1 SV=1                           |
| sp P17812 PYRG1_HUMAN | HUMAN | CTP synthase 1 OS=Homo sapiens OX=9606 GN=CTPS1 PE=1 SV=2                                       |
| sp Q9NTK5 OLA1_HUMAN  | HUMAN | Obg-like ATPase 1 OS=Homo sapiens OX=9606 GN=OLA1 PE=1 SV=2                                     |
| sp P61225 RAP2B_HUMAN | HUMAN | Ras-related protein Rap-2b OS=Homo sapiens OX=9606 GN=RAP2B PE=1 SV=1                           |
| sp Q12913 PTPRJ_HUMAN | HUMAN | Receptor-type tyrosine-protein phosphatase eta OS=Homo sapiens OX=9606 GN=PTPRJ PE=1 SV=3       |
| sp O43390 HNRPR_HUMAN | HUMAN | Heterogeneous nuclear ribonucleoprotein R OS=Homo sapiens OX=9606 GN=HNRNPR PE=1 SV=1           |
| sp P06730 EIF4E_HUMAN | HUMAN | Eukaryotic translation initiation factor 4E OS=Homo sapiens OX=9606 GN=EIF4E PE=1 SV=2          |
| sp P13489 RINI_HUMAN  | HUMAN | Ribonuclease inhibitor OS=Homo sapiens OX=9606 GN=RNH1 PE=1 SV=2                                |
| sp P08243 ASNS_HUMAN  | HUMAN | Asparagine synthetase [glutamine-hydrolyzing] OS=Homo sapiens OX=9606 GN=ASNS PE=1 SV=4         |

|                       |       |                                                                                                  |
|-----------------------|-------|--------------------------------------------------------------------------------------------------|
| sp P60953 CDC42_HUMAN | HUMAN | Cell division control protein 42 homolog OS=Homo sapiens OX=9606 GN=CDC42 PE=1 SV=2              |
| sp P84095 RHOG_HUMAN  | HUMAN | Rho-related GTP-binding protein RhoG OS=Homo sapiens OX=9606 GN=RHOG PE=1 SV=1                   |
| sp Q96DI7 SNR40_HUMAN | HUMAN | U5 small nuclear ribonucleoprotein 40 kDa protein OS=Homo sapiens OX=9606 GN=SNRNP40 PE=1 SV=1   |
| sp Q8WWI5 CTL1_HUMAN  | HUMAN | Choline transporter-like protein 1 OS=Homo sapiens OX=9606 GN=SLC44A1 PE=1 SV=1                  |
| sp Q8IV08 PLD3_HUMAN  | HUMAN | 5'-3' exonuclease PLD3 OS=Homo sapiens OX=9606 GN=PLD3 PE=1 SV=1                                 |
| sp P51884 LUM_HUMAN   | HUMAN | Lumican OS=Homo sapiens OX=9606 GN=LUM PE=1 SV=2                                                 |
| sp P01730 CD4_HUMAN   | HUMAN | T-cell surface glycoprotein CD4 OS=Homo sapiens OX=9606 GN=CD4 PE=1 SV=1                         |
| sp P48556 PSMD8_HUMAN | HUMAN | 26S proteasome non-ATPase regulatory subunit 8 OS=Homo sapiens OX=9606 GN=PSMD8 PE=1 SV=2        |
| sp P61247 RS3A_HUMAN  | HUMAN | 40S ribosomal protein S3a OS=Homo sapiens OX=9606 GN=RPS3A PE=1 SV=2                             |
| sp P50914 RL14_HUMAN  | HUMAN | 60S ribosomal protein L14 OS=Homo sapiens OX=9606 GN=RPL14 PE=1 SV=4                             |
| sp P62280 RS11_HUMAN  | HUMAN | 40S ribosomal protein S11 OS=Homo sapiens OX=9606 GN=RPS11 PE=1 SV=3                             |
| sp P08246 ELNE_HUMAN  | HUMAN | Neutrophil elastase OS=Homo sapiens OX=9606 GN=ELANE PE=1 SV=1                                   |
| sp Q02543 RL18A_HUMAN | HUMAN | 60S ribosomal protein L18a OS=Homo sapiens OX=9606 GN=RPL18A PE=1 SV=2                           |
| sp P06493 CDK1_HUMAN  | HUMAN | Cyclin-dependent kinase 1 OS=Homo sapiens OX=9606 GN=CDK1 PE=1 SV=3                              |
| sp P08754 GNAI3_HUMAN | HUMAN | Guanine nucleotide-binding protein G(i) subunit alpha OS=Homo sapiens OX=9606 GN=GNAI3 PE=1 SV=3 |
| sp Q71DI3 H32_HUMAN   | HUMAN | Histone H3.2 OS=Homo sapiens OX=9606 GN=HIST2H3A PE=1 SV=3                                       |
| sp P28062 PSB8_HUMAN  | HUMAN | Proteasome subunit beta type-8 OS=Homo sapiens OX=9606 GN=PSMB8 PE=1 SV=3                        |
| sp O60488 ACSL4_HUMAN | HUMAN | Long-chain-fatty-acid--CoA ligase 4 OS=Homo sapiens OX=9606 GN=ACSL4 PE=1 SV=2                   |
| sp P62258 1433E_HUMAN | HUMAN | 14-3-3 protein epsilon OS=Homo sapiens OX=9606 GN=YWHAE PE=1 SV=1                                |
| sp Q02878 RL6_HUMAN   | HUMAN | 60S ribosomal protein L6 OS=Homo sapiens OX=9606 GN=RPL6 PE=1 SV=3                               |
| sp P62851 RS25_HUMAN  | HUMAN | 40S ribosomal protein S25 OS=Homo sapiens OX=9606 GN=RPS25 PE=1 SV=1                             |
| sp P10809 CH60_HUMAN  | HUMAN | 60 kDa heat shock protein, mitochondrial OS=Homo sapiens OX=9606 GN=HSPD1 PE=1 SV=2              |
| sp P14550 AK1A1_HUMAN | HUMAN | Aldo-keto reductase family 1 member A1 OS=Homo sapiens OX=9606 GN=AKR1A1 PE=1 SV=3               |
| sp Q07020 RL18_HUMAN  | HUMAN | 60S ribosomal protein L18 OS=Homo sapiens OX=9606 GN=RPL18 PE=1 SV=2                             |
| sp P20645 MPRD_HUMAN  | HUMAN | Cation-dependent mannose-6-phosphate receptor OS=Homo sapiens OX=9606 GN=M6PR PE=1 SV=1          |
| sp O75531 BAF_HUMAN   | HUMAN | Barrier-to-autointegration factor OS=Homo sapiens OX=9606 GN=BANF1 PE=1 SV=1                     |
| sp P61289 PSME3_HUMAN | HUMAN | Proteasome activator complex subunit 3 OS=Homo sapiens OX=9606 GN=PSME3 PE=1 SV=1                |
| sp P62244 RS15A_HUMAN | HUMAN | 40S ribosomal protein S15a OS=Homo sapiens OX=9606 GN=RPS15A PE=1 SV=2                           |
| sp P06132 DCUP_HUMAN  | HUMAN | Uroporphyrinogen decarboxylase OS=Homo sapiens OX=9606 GN=UROD PE=1 SV=2                         |
| sp Q9GZY6 NTAL_HUMAN  | HUMAN | Linker for activation of T-cells family member 2 OS=Homo sapiens OX=9606 GN=LAT2 PE=1 SV=1       |
| sp P78417 GSTO1_HUMAN | HUMAN | Glutathione S-transferase omega-1 OS=Homo sapiens OX=9606 GN=GSTO1 PE=1 SV=2                     |

|                        |       |                                                                                                               |
|------------------------|-------|---------------------------------------------------------------------------------------------------------------|
| sp Q96A65 EXOC4_HUMAN  | HUMAN | Exocyst complex component 4 OS=Homo sapiens OX=9606 GN=EXOC4 PE=1 SV=1                                        |
| sp P07996 TSP1_HUMAN   | HUMAN | Thrombospondin-1 OS=Homo sapiens OX=9606 GN=THBS1 PE=1 SV=2                                                   |
| sp P18621 RL17_HUMAN   | HUMAN | 60S ribosomal protein L17 OS=Homo sapiens OX=9606 GN=RPL17 PE=1 SV=3                                          |
| sp Q99805 TM9SF2_HUMAN | HUMAN | Transmembrane 9 superfamily member 2 OS=Homo sapiens OX=9606 GN=TM9SF2 PE=1 SV=1                              |
| sp P11166 GTR1_HUMAN   | HUMAN | Solute carrier family 2, facilitated glucose transporter member 1 OS=Homo sapiens OX=9606 GN=SLC2A1 PE=1 SV=2 |
| sp P16401 H15_HUMAN    | HUMAN | Histone H1.5 OS=Homo sapiens OX=9606 GN=H1-5 PE=1 SV=3                                                        |
| sp Q13451 FKBP5_HUMAN  | HUMAN | Peptidyl-prolyl cis-trans isomerase FKBP5 OS=Homo sapiens OX=9606 GN=FKBP5 PE=1 SV=2                          |
| sp O43865 SAHH2_HUMAN  | HUMAN | S-adenosylhomocysteine hydrolase-like protein 1 OS=Homo sapiens OX=9606 GN=AHCYL1 PE=1 SV=2                   |
| sp O14744 ANM5_HUMAN   | HUMAN | Protein arginine N-methyltransferase 5 OS=Homo sapiens OX=9606 GN=PRMT5 PE=1 SV=4                             |
| sp P29350 PTN6_HUMAN   | HUMAN | Tyrosine-protein phosphatase non-receptor type 6 OS=Homo sapiens OX=9606 GN=PTPN6 PE=1 SV=1                   |
| sp P62191 PRS4_HUMAN   | HUMAN | 26S proteasome regulatory subunit 4 OS=Homo sapiens OX=9606 GN=PSMC1 PE=1 SV=1                                |
| sp P19440 GGT1_HUMAN   | HUMAN | Glutathione hydrolase 1 proenzyme OS=Homo sapiens OX=9606 GN=GGT1 PE=1 SV=2                                   |
| sp Q9H9T3 ELP3_HUMAN   | HUMAN | Elongator complex protein 3 OS=Homo sapiens OX=9606 GN=ELP3 PE=1 SV=2                                         |
| sp P40429 RL13A_HUMAN  | HUMAN | 60S ribosomal protein L13a OS=Homo sapiens OX=9606 GN=RPL13A PE=1 SV=2                                        |
| sp Q9Y6G9 DC1L1_HUMAN  | HUMAN | Cytoplasmic dynein 1 light intermediate chain 1 OS=Homo sapiens OX=9606 GN=DYNC1LI1 PE=1 SV=3                 |
| sp P08631 HCK_HUMAN    | HUMAN | Tyrosine-protein kinase HCK OS=Homo sapiens OX=9606 GN=HCK PE=1 SV=5                                          |
| sp O43324 MCA3_HUMAN   | HUMAN | Eukaryotic translation elongation factor 1 epsilon-1 OS=Homo sapiens OX=9606 GN=EEF1E1 PE=1 SV=1              |
| sp P27694 RFA1_HUMAN   | HUMAN | Replication protein A 70 kDa DNA-binding subunit OS=Homo sapiens OX=9606 GN=RPA1 PE=1 SV=2                    |
| sp P11215 ITAM_HUMAN   | HUMAN | Integrin alpha-M OS=Homo sapiens OX=9606 GN=ITGAM PE=1 SV=2                                                   |
| sp Q16222 UAP1_HUMAN   | HUMAN | UDP-N-acetylhexosamine pyrophosphorylase OS=Homo sapiens OX=9606 GN=UAP1 PE=1 SV=3                            |
| sp Q8N5I2 ARRD1_HUMAN  | HUMAN | Arrestin domain-containing protein 1 OS=Homo sapiens OX=9606 GN=ARRDC1 PE=1 SV=1                              |
| sp Q9NV70 EXOC1_HUMAN  | HUMAN | Exocyst complex component 1 OS=Homo sapiens OX=9606 GN=EXOC1 PE=1 SV=4                                        |
| sp Q9NQW7 XPP1_HUMAN   | HUMAN | Xaa-Pro aminopeptidase 1 OS=Homo sapiens OX=9606 GN=XPNPPEP1 PE=1 SV=3                                        |
| sp Q6IB50 TWF2_HUMAN   | HUMAN | Twinfilin-2 OS=Homo sapiens OX=9606 GN=TWF2 PE=1 SV=2                                                         |
| sp P32969 RL9_HUMAN    | HUMAN | 60S ribosomal protein L9 OS=Homo sapiens OX=9606 GN=RPL9 PE=1 SV=1                                            |
| sp Q9Y4L1 HYOU1_HUMAN  | HUMAN | Hypoxia up-regulated protein 1 OS=Homo sapiens OX=9606 GN=HYOU1 PE=1 SV=1                                     |
| sp P07741 APT_HUMAN    | HUMAN | Adenine phosphoribosyltransferase OS=Homo sapiens OX=9606 GN=APRT PE=1 SV=2                                   |
| sp P09496 CLCA_HUMAN   | HUMAN | Clathrin light chain A OS=Homo sapiens OX=9606 GN=CLTA PE=1 SV=1                                              |
| sp P06396 GELS_HUMAN   | HUMAN | Gelsolin OS=Homo sapiens OX=9606 GN=GSN PE=1 SV=1                                                             |
| sp P53985 MOT1_HUMAN   | HUMAN | Monocarboxylate transporter 1 OS=Homo sapiens OX=9606 GN=SLC16A1 PE=1 SV=3                                    |

|                       |       |                                                                                                             |
|-----------------------|-------|-------------------------------------------------------------------------------------------------------------|
| sp Q12905 ILF2_HUMAN  | HUMAN | Interleukin enhancer-binding factor 2 OS=Homo sapiens OX=9606 GN=ILF2 PE=1 SV=2                             |
| sp O15143 ARC1B_HUMAN | HUMAN | Actin-related protein 2/3 complex subunit 1B OS=Homo sapiens OX=9606 GN=ARPC1B PE=1 SV=3                    |
| sp P11908 PRPS2_HUMAN | HUMAN | Ribose-phosphate pyrophosphokinase 2 OS=Homo sapiens OX=9606 GN=PRPS2 PE=1 SV=2                             |
| sp O60763 USO1_HUMAN  | HUMAN | General vesicular transport factor p115 OS=Homo sapiens OX=9606 GN=USO1 PE=1 SV=2                           |
| sp Q9UJ70 NAGK_HUMAN  | HUMAN | N-acetyl-D-glucosamine kinase OS=Homo sapiens OX=9606 GN=NAGK PE=1 SV=4                                     |
| sp O95373 IPO7_HUMAN  | HUMAN | Importin-7 OS=Homo sapiens OX=9606 GN=IPO7 PE=1 SV=1                                                        |
| sp P07195 LDHB_HUMAN  | HUMAN | L-lactate dehydrogenase B chain OS=Homo sapiens OX=9606 GN=LDHB PE=1 SV=2                                   |
| sp P49721 PSB2_HUMAN  | HUMAN | Proteasome subunit beta type-2 OS=Homo sapiens OX=9606 GN=PSMB2 PE=1 SV=1                                   |
| sp P49915 GUAA_HUMAN  | HUMAN | GMP synthase [glutamine-hydrolyzing] OS=Homo sapiens OX=9606 GN=GMPS PE=1 SV=1                              |
| sp P15529 MCP_HUMAN   | HUMAN | Membrane cofactor protein OS=Homo sapiens OX=9606 GN=CD46 PE=1 SV=3                                         |
| sp P50225 ST1A1_HUMAN | HUMAN | Sulfotransferase 1A1 OS=Homo sapiens OX=9606 GN=SULT1A1 PE=1 SV=3                                           |
| sp P68371 TBB4B_HUMAN | HUMAN | Tubulin beta-4B chain OS=Homo sapiens OX=9606 GN=TUBB4B PE=1 SV=1                                           |
| sp Q04760 LGUL_HUMAN  | HUMAN | Lactoylglutathione lyase OS=Homo sapiens OX=9606 GN=GLO1 PE=1 SV=4                                          |
| sp P22234 PUR6_HUMAN  | HUMAN | Multifunctional protein ADE2 OS=Homo sapiens OX=9606 GN=PAICS PE=1 SV=3                                     |
| sp Q9UBT2 SAE2_HUMAN  | HUMAN | SUMO-activating enzyme subunit 2 OS=Homo sapiens OX=9606 GN=UBA2 PE=1 SV=2                                  |
| sp Q9Y6M7 S4A7_HUMAN  | HUMAN | Sodium bicarbonate cotransporter 3 OS=Homo sapiens OX=9606 GN=SLC4A7 PE=1 SV=2                              |
| sp P61353 RL27_HUMAN  | HUMAN | 60S ribosomal protein L27 OS=Homo sapiens OX=9606 GN=RPL27 PE=1 SV=2                                        |
| sp P08758 ANXA5_HUMAN | HUMAN | Annexin A5 OS=Homo sapiens OX=9606 GN=ANXA5 PE=1 SV=2                                                       |
| sp Q9Y617 SERC_HUMAN  | HUMAN | Phosphoserine aminotransferase OS=Homo sapiens OX=9606 GN=PSAT1 PE=1 SV=2                                   |
| sp P62847 RS24_HUMAN  | HUMAN | 40S ribosomal protein S24 OS=Homo sapiens OX=9606 GN=RPS24 PE=1 SV=1                                        |
| sp O94776 MTA2_HUMAN  | HUMAN | Metastasis-associated protein MTA2 OS=Homo sapiens OX=9606 GN=MTA2 PE=1 SV=1                                |
| sp P05455 LA_HUMAN    | HUMAN | Lupus La protein OS=Homo sapiens OX=9606 GN=SSB PE=1 SV=2                                                   |
| sp P14324 FPPS_HUMAN  | HUMAN | Farnesyl pyrophosphate synthase OS=Homo sapiens OX=9606 GN=FDPS PE=1 SV=4                                   |
| sp P51665 PSMD7_HUMAN | HUMAN | 26S proteasome non-ATPase regulatory subunit 7 OS=Homo sapiens OX=9606 GN=PSMD7 PE=1 SV=2                   |
| sp P63000 RAC1_HUMAN  | HUMAN | Ras-related C3 botulinum toxin substrate 1 OS=Homo sapiens OX=9606 GN=RAC1 PE=1 SV=1                        |
| sp Q96T76 MMS19_HUMAN | HUMAN | MMS19 nucleotide excision repair protein homolog OS=Homo sapiens OX=9606 GN=MMS19 PE=1 SV=2                 |
| sp Q06187 BTK_HUMAN   | HUMAN | Tyrosine-protein kinase BTK OS=Homo sapiens OX=9606 GN=BTK PE=1 SV=3                                        |
| sp P25789 PSA4_HUMAN  | HUMAN | Proteasome subunit alpha type-4 OS=Homo sapiens OX=9606 GN=PSMA4 PE=1 SV=1                                  |
| sp P13861 KAP2_HUMAN  | HUMAN | cAMP-dependent protein kinase type II-alpha regulatory subunit OS=Homo sapiens OX=9606 GN=PRKAR2A PE=1 SV=2 |
| sp P04632 CPNS1_HUMAN | HUMAN | Calpain small subunit 1 OS=Homo sapiens OX=9606 GN=CAPNS1 PE=1 SV=1                                         |

|                       |       |                                                                                                                |
|-----------------------|-------|----------------------------------------------------------------------------------------------------------------|
| sp O43813 LANC1_HUMAN | HUMAN | Glutathione S-transferase LANCL1 OS=Homo sapiens OX=9606 GN=LANCL1 PE=1 SV=1                                   |
| sp Q71UI9 H2AV_HUMAN  | HUMAN | Histone H2A.V OS=Homo sapiens OX=9606 GN=H2AFV PE=1 SV=3                                                       |
| sp Q7L2H7 EIF3M_HUMAN | HUMAN | Eukaryotic translation initiation factor 3 subunit M OS=Homo sapiens OX=9606 GN=EIF3M PE=1 SV=1                |
| sp P56537 IF6_HUMAN   | HUMAN | Eukaryotic translation initiation factor 6 OS=Homo sapiens OX=9606 GN=EIF6 PE=1 SV=1                           |
| sp Q9UGN4 CLM8_HUMAN  | HUMAN | CMRF35-like molecule 8 OS=Homo sapiens OX=9606 GN=CD300A PE=1 SV=2                                             |
| sp P02794 FRIH_HUMAN  | HUMAN | Ferritin heavy chain OS=Homo sapiens OX=9606 GN=FTH1 PE=1 SV=2                                                 |
| sp Q6GTX8 LAIR1_HUMAN | HUMAN | Leukocyte-associated immunoglobulin-like receptor 1 OS=Homo sapiens OX=9606 GN=LAIR1 PE=1 SV=1                 |
| sp Q8WTV0 SCRB1_HUMAN | HUMAN | Scavenger receptor class B member 1 OS=Homo sapiens OX=9606 GN=SCARB1 PE=1 SV=1                                |
| sp Q08431 MFGM_HUMAN  | HUMAN | Lactadherin OS=Homo sapiens OX=9606 GN=MFGE8 PE=1 SV=3                                                         |
| sp P48444 COPD_HUMAN  | HUMAN | Coatomer subunit delta OS=Homo sapiens OX=9606 GN=ARCN1 PE=1 SV=1                                              |
| sp Q9Y624 JAM1_HUMAN  | HUMAN | Junctional adhesion molecule A OS=Homo sapiens OX=9606 GN=F11R PE=1 SV=1                                       |
| sp Q9H813 PACC1_HUMAN | HUMAN | Proton-activated chloride channel OS=Homo sapiens OX=9606 GN=PACC1 PE=1 SV=1                                   |
| sp Q15833 STXB2_HUMAN | HUMAN | Syntaxin-binding protein 2 OS=Homo sapiens OX=9606 GN=STXBP2 PE=1 SV=2                                         |
| sp P62081 RS7_HUMAN   | HUMAN | 40S ribosomal protein S7 OS=Homo sapiens OX=9606 GN=RPS7 PE=1 SV=1                                             |
| sp Q9UNF0 PACN2_HUMAN | HUMAN | Protein kinase C and casein kinase substrate in neurons protein 2 OS=Homo sapiens OX=9606 GN=PACSIN2 PE=1 SV=2 |
| sp Q9NT62 ATG3_HUMAN  | HUMAN | Ubiquitin-like-conjugating enzyme ATG3 OS=Homo sapiens OX=9606 GN=ATG3 PE=1 SV=1                               |
| sp Q14558 KPRA_HUMAN  | HUMAN | Phosphoribosyl pyrophosphate synthase-associated protein 1 OS=Homo sapiens OX=9606 GN=PRPSAP1 PE=1 SV=2        |
| sp P62318 SMD3_HUMAN  | HUMAN | Small nuclear ribonucleoprotein Sm D3 OS=Homo sapiens OX=9606 GN=SNRPD3 PE=1 SV=1                              |
| sp P62269 RS18_HUMAN  | HUMAN | 40S ribosomal protein S18 OS=Homo sapiens OX=9606 GN=RPS18 PE=1 SV=3                                           |
| sp P62263 RS14_HUMAN  | HUMAN | 40S ribosomal protein S14 OS=Homo sapiens OX=9606 GN=RPS14 PE=1 SV=3                                           |
| sp P29692 EF1D_HUMAN  | HUMAN | Elongation factor 1-delta OS=Homo sapiens OX=9606 GN=EEF1D PE=1 SV=5                                           |
| sp P02792 FRIL_HUMAN  | HUMAN | Ferritin light chain OS=Homo sapiens OX=9606 GN=FTL PE=1 SV=2                                                  |
| sp P0DMR1 HNRC4_HUMAN | HUMAN | Heterogeneous nuclear ribonucleoprotein C-like 4 OS=Homo sapiens OX=9606 GN=HNRNPCL4 PE=3 SV=1                 |
| sp P18085 ARF4_HUMAN  | HUMAN | ADP-ribosylation factor 4 OS=Homo sapiens OX=9606 GN=ARF4 PE=1 SV=3                                            |
| sp P61981 1433G_HUMAN | HUMAN | 14-3-3 protein gamma OS=Homo sapiens OX=9606 GN=YWHAG PE=1 SV=2                                                |
| sp O00571 DDX3X_HUMAN | HUMAN | ATP-dependent RNA helicase DDX3X OS=Homo sapiens OX=9606 GN=DDX3X PE=1 SV=3                                    |
| sp Q9UBQ5 EIF3K_HUMAN | HUMAN | Eukaryotic translation initiation factor 3 subunit K OS=Homo sapiens OX=9606 GN=EIF3K PE=1 SV=1                |
| sp P11766 ADHX_HUMAN  | HUMAN | Alcohol dehydrogenase class-3 OS=Homo sapiens OX=9606 GN=ADH5 PE=1 SV=4                                        |
| sp Q7Z4W1 DCXR_HUMAN  | HUMAN | L-xylulose reductase OS=Homo sapiens OX=9606 GN=DCXR PE=1 SV=2                                                 |
| sp P43490 NAMPT_HUMAN | HUMAN | Nicotinamide phosphoribosyltransferase OS=Homo sapiens OX=9606 GN=NAMPT PE=1 SV=1                              |

|                       |       |                                                                                                           |
|-----------------------|-------|-----------------------------------------------------------------------------------------------------------|
| sp Q14203 DCTN1_HUMAN | HUMAN | Dynactin subunit 1 OS=Homo sapiens OX=9606 GN=DCTN1 PE=1 SV=3                                             |
| sp P28070 PSB4_HUMAN  | HUMAN | Proteasome subunit beta type-4 OS=Homo sapiens OX=9606 GN=PSMB4 PE=1 SV=4                                 |
| sp P06748 NPM_HUMAN   | HUMAN | Nucleophosmin OS=Homo sapiens OX=9606 GN=NPM1 PE=1 SV=2                                                   |
| sp P04040 CATA_HUMAN  | HUMAN | Catalase OS=Homo sapiens OX=9606 GN=CAT PE=1 SV=3                                                         |
| sp P51809 VAMP7_HUMAN | HUMAN | Vesicle-associated membrane protein 7 OS=Homo sapiens OX=9606 GN=VAMP7 PE=1 SV=3                          |
| sp O75976 CBPD_HUMAN  | HUMAN | Carboxypeptidase D OS=Homo sapiens OX=9606 GN=CPD PE=1 SV=2                                               |
| sp Q6UXN9 WDR82_HUMAN | HUMAN | WD repeat-containing protein 82 OS=Homo sapiens OX=9606 GN=WDR82 PE=1 SV=1                                |
| sp P43034 LIS1_HUMAN  | HUMAN | Platelet-activating factor acetylhydrolase IB subunit alpha OS=Homo sapiens OX=9606 GN=PAFAH1B1 PE=1 SV=2 |
| sp O75351 VPS4B_HUMAN | HUMAN | Vacuolar protein sorting-associated protein 4B OS=Homo sapiens OX=9606 GN=VPS4B PE=1 SV=2                 |
| sp O14786 NRP1_HUMAN  | HUMAN | Neuropilin-1 OS=Homo sapiens OX=9606 GN=NRP1 PE=1 SV=3                                                    |
| sp P14866 HNRPL_HUMAN | HUMAN | Heterogeneous nuclear ribonucleoprotein L OS=Homo sapiens OX=9606 GN=HNRNPL PE=1 SV=2                     |
| sp P13807 GYS1_HUMAN  | HUMAN | Glycogen [starch] synthase, muscle OS=Homo sapiens OX=9606 GN=GYS1 PE=1 SV=2                              |
| sp P62753 RS6_HUMAN   | HUMAN | 40S ribosomal protein S6 OS=Homo sapiens OX=9606 GN=RPS6 PE=1 SV=1                                        |
| sp P52565 GDIR1_HUMAN | HUMAN | Rho GDP-dissociation inhibitor 1 OS=Homo sapiens OX=9606 GN=ARHGDIA PE=1 SV=3                             |
| sp Q13765 NACA_HUMAN  | HUMAN | Nascent polypeptide-associated complex subunit alpha OS=Homo sapiens OX=9606 GN=NACA PE=1 SV=1            |
| sp P30101 PDIA3_HUMAN | HUMAN | Protein disulfide-isomerase A3 OS=Homo sapiens OX=9606 GN=PDIA3 PE=1 SV=4                                 |
| sp P17813 EGLN_HUMAN  | HUMAN | Endoglin OS=Homo sapiens OX=9606 GN=ENG PE=1 SV=2                                                         |
| sp P26006 ITA3_HUMAN  | HUMAN | Integrin alpha-3 OS=Homo sapiens OX=9606 GN=ITGA3 PE=1 SV=5                                               |
| sp P52292 IMA1_HUMAN  | HUMAN | Importin subunit alpha-1 OS=Homo sapiens OX=9606 GN=KPNA2 PE=1 SV=1                                       |
| sp Q96QD8 S38A2_HUMAN | HUMAN | Sodium-coupled neutral amino acid transporter 2 OS=Homo sapiens OX=9606 GN=SLC38A2 PE=1 SV=2              |
| sp P54709 AT1B3_HUMAN | HUMAN | Sodium/potassium-transporting ATPase subunit beta-3 OS=Homo sapiens OX=9606 GN=ATP1B3 PE=1 SV=1           |
| sp P05387 RLA2_HUMAN  | HUMAN | 60S acidic ribosomal protein P2 OS=Homo sapiens OX=9606 GN=RPLP2 PE=1 SV=1                                |
| sp P62910 RL32_HUMAN  | HUMAN | 60S ribosomal protein L32 OS=Homo sapiens OX=9606 GN=RPL32 PE=1 SV=2                                      |
| sp Q92608 DOCK2_HUMAN | HUMAN | Dedicator of cytokinesis protein 2 OS=Homo sapiens OX=9606 GN=DOCK2 PE=1 SV=2                             |
| sp P83731 RL24_HUMAN  | HUMAN | 60S ribosomal protein L24 OS=Homo sapiens OX=9606 GN=RPL24 PE=1 SV=1                                      |
| sp Q15181 IPYR_HUMAN  | HUMAN | Inorganic pyrophosphatase OS=Homo sapiens OX=9606 GN=PPA1 PE=1 SV=2                                       |
| sp Q08945 SSRP1_HUMAN | HUMAN | FACT complex subunit SSRP1 OS=Homo sapiens OX=9606 GN=SSRP1 PE=1 SV=1                                     |
| sp O14929 HAT1_HUMAN  | HUMAN | Histone acetyltransferase type B catalytic subunit OS=Homo sapiens OX=9606 GN=HAT1 PE=1 SV=1              |
| sp Q8TAG9 EXOC6_HUMAN | HUMAN | Exocyst complex component 6 OS=Homo sapiens OX=9606 GN=EXOC6 PE=1 SV=3                                    |
| sp O95819 M4K4_HUMAN  | HUMAN | Mitogen-activated protein kinase kinase kinase 4 OS=Homo sapiens OX=9606 GN=MAP4K4 PE=1 SV=2              |

|                       |       |                                                                                                               |
|-----------------------|-------|---------------------------------------------------------------------------------------------------------------|
| sp P12004 PCNA_HUMAN  | HUMAN | Proliferating cell nuclear antigen OS=Homo sapiens OX=9606 GN=PCNA PE=1 SV=1                                  |
| sp Q9Y5B9 SPT16_HUMAN | HUMAN | FACT complex subunit SPT16 OS=Homo sapiens OX=9606 GN=SUPT16H PE=1 SV=1                                       |
| sp Q99447 PCY2_HUMAN  | HUMAN | Ethanolamine-phosphate cytidyltransferase OS=Homo sapiens OX=9606 GN=PCYT2 PE=1 SV=1                          |
| sp O15371 EIF3D_HUMAN | HUMAN | Eukaryotic translation initiation factor 3 subunit D OS=Homo sapiens OX=9606 GN=EIF3D PE=1 SV=1               |
| sp P22352 GPX3_HUMAN  | HUMAN | Glutathione peroxidase 3 OS=Homo sapiens OX=9606 GN=GPX3 PE=1 SV=2                                            |
| sp P32970 CD70_HUMAN  | HUMAN | CD70 antigen OS=Homo sapiens OX=9606 GN=CD70 PE=1 SV=2                                                        |
| sp Q96CW1 AP2M1_HUMAN | HUMAN | AP-2 complex subunit mu OS=Homo sapiens OX=9606 GN=AP2M1 PE=1 SV=2                                            |
| sp P19823 ITIH2_HUMAN | HUMAN | Inter-alpha-trypsin inhibitor heavy chain H2 OS=Homo sapiens OX=9606 GN=ITIH2 PE=1 SV=2                       |
| sp P11169 GTR3_HUMAN  | HUMAN | Solute carrier family 2, facilitated glucose transporter member 3 OS=Homo sapiens OX=9606 GN=SLC2A3 PE=1 SV=1 |
| sp P62879 GBB2_HUMAN  | HUMAN | Guanine nucleotide-binding protein G(I)/G(S)/G(T) subunit beta-2 OS=Homo sapiens OX=9606 GN=GNB2 PE=1 SV=3    |
| sp P27707 DCK_HUMAN   | HUMAN | Deoxycytidine kinase OS=Homo sapiens OX=9606 GN=DCK PE=1 SV=1                                                 |
| sp Q9NXR7 BABA2_HUMAN | HUMAN | BRISC and BRCA1-A complex member 2 OS=Homo sapiens OX=9606 GN=BABAM2 PE=1 SV=2                                |
| sp P51812 KS6A3_HUMAN | HUMAN | Ribosomal protein S6 kinase alpha-3 OS=Homo sapiens OX=9606 GN=RPS6KA3 PE=1 SV=1                              |
| sp Q9Y315 DEOC_HUMAN  | HUMAN | Deoxyribose-phosphate aldolase OS=Homo sapiens OX=9606 GN=DERA PE=1 SV=2                                      |
| sp Q15366 PCBP2_HUMAN | HUMAN | Poly(rC)-binding protein 2 OS=Homo sapiens OX=9606 GN=PCBP2 PE=1 SV=1                                         |
| sp Q8NC42 RN149_HUMAN | HUMAN | E3 ubiquitin-protein ligase RNF149 OS=Homo sapiens OX=9606 GN=RNF149 PE=2 SV=2                                |
| sp Q9UBQ0 VPS29_HUMAN | HUMAN | Vacuolar protein sorting-associated protein 29 OS=Homo sapiens OX=9606 GN=VPS29 PE=1 SV=1                     |
| sp Q15019 SEPT2_HUMAN | HUMAN | Septin-2 OS=Homo sapiens OX=9606 GN=SEPTIN2 PE=1 SV=1                                                         |
| sp Q92597 NDRG1_HUMAN | HUMAN | Protein NDRG1 OS=Homo sapiens OX=9606 GN=NDRG1 PE=1 SV=1                                                      |
| sp Q9Y3U8 RL36_HUMAN  | HUMAN | 60S ribosomal protein L36 OS=Homo sapiens OX=9606 GN=RPL36 PE=1 SV=3                                          |
| sp P46782 RS5_HUMAN   | HUMAN | 40S ribosomal protein S5 OS=Homo sapiens OX=9606 GN=RPS5 PE=1 SV=4                                            |
| sp Q16181 SEPT7_HUMAN | HUMAN | Septin-7 OS=Homo sapiens OX=9606 GN=SEPTIN7 PE=1 SV=2                                                         |
| sp O75695 XRP2_HUMAN  | HUMAN | Protein XRP2 OS=Homo sapiens OX=9606 GN=RP2 PE=1 SV=4                                                         |
| sp P18433 PTPRA_HUMAN | HUMAN | Receptor-type tyrosine-protein phosphatase alpha OS=Homo sapiens OX=9606 GN=PTPRA PE=1 SV=3                   |
| sp Q9BZQ8 NIBA1_HUMAN | HUMAN | Protein Niban 1 OS=Homo sapiens OX=9606 GN=NIBAN1 PE=1 SV=1                                                   |
| sp Q9GZS3 WDR61_HUMAN | HUMAN | WD repeat-containing protein 61 OS=Homo sapiens OX=9606 GN=WDR61 PE=1 SV=1                                    |
| sp Q86Y82 STX12_HUMAN | HUMAN | Syntaxin-12 OS=Homo sapiens OX=9606 GN=STX12 PE=1 SV=1                                                        |
| sp Q92499 DDX1_HUMAN  | HUMAN | ATP-dependent RNA helicase DDX1 OS=Homo sapiens OX=9606 GN=DDX1 PE=1 SV=2                                     |
| sp Q06210 GFPT1_HUMAN | HUMAN | Glutamine--fructose-6-phosphate aminotransferase [isomerizing] 1 OS=Homo sapiens OX=9606 GN=GFPT1 PE=1 SV=3   |

|                       |       |                                                                                                    |
|-----------------------|-------|----------------------------------------------------------------------------------------------------|
| sp Q09028 RBBP4_HUMAN | HUMAN | Histone-binding protein RBBP4 OS=Homo sapiens OX=9606 GN=RBBP4 PE=1 SV=3                           |
| sp Q9UI12 VATH_HUMAN  | HUMAN | V-type proton ATPase subunit H OS=Homo sapiens OX=9606 GN=ATP6V1H PE=1 SV=1                        |
| sp O75367 H2AY_HUMAN  | HUMAN | Core histone macro-H2A.1 OS=Homo sapiens OX=9606 GN=MACROH2A1 PE=1 SV=4                            |
| sp O00203 AP3B1_HUMAN | HUMAN | AP-3 complex subunit beta-1 OS=Homo sapiens OX=9606 GN=AP3B1 PE=1 SV=3                             |
| sp P09429 HMGB1_HUMAN | HUMAN | High mobility group protein B1 OS=Homo sapiens OX=9606 GN=HMGB1 PE=1 SV=3                          |
| sp O60341 KDM1A_HUMAN | HUMAN | Lysine-specific histone demethylase 1A OS=Homo sapiens OX=9606 GN=KDM1A PE=1 SV=2                  |
| sp Q16531 DDB1_HUMAN  | HUMAN | DNA damage-binding protein 1 OS=Homo sapiens OX=9606 GN=DDB1 PE=1 SV=1                             |
| sp P14923 PLAK_HUMAN  | HUMAN | Junction plakoglobin OS=Homo sapiens OX=9606 GN=JUP PE=1 SV=3                                      |
| sp O75874 IDHC_HUMAN  | HUMAN | Isocitrate dehydrogenase [NADP] cytoplasmic OS=Homo sapiens OX=9606 GN=IDH1 PE=1 SV=2              |
| sp P63162 RSMN_HUMAN  | HUMAN | Small nuclear ribonucleoprotein-associated protein N OS=Homo sapiens OX=9606 GN=SNRPN PE=1 SV=1    |
| sp P30520 PURA2_HUMAN | HUMAN | Adenylosuccinate synthetase isozyme 2 OS=Homo sapiens OX=9606 GN=ADSS2 PE=1 SV=3                   |
| sp P06753 TPM3_HUMAN  | HUMAN | Tropomyosin alpha-3 chain OS=Homo sapiens OX=9606 GN=TPM3 PE=1 SV=2                                |
| sp Q9NR45 SIAS_HUMAN  | HUMAN | Sialic acid synthase OS=Homo sapiens OX=9606 GN=NANS PE=1 SV=2                                     |
| sp O00160 MYO1F_HUMAN | HUMAN | Unconventional myosin-I f OS=Homo sapiens OX=9606 GN=MYO1F PE=1 SV=3                               |
| sp O43172 PRP4_HUMAN  | HUMAN | U4/U6 small nuclear ribonucleoprotein Prp4 OS=Homo sapiens OX=9606 GN=PRPF4 PE=1 SV=2              |
| sp P51570 GALK1_HUMAN | HUMAN | Galactokinase OS=Homo sapiens OX=9606 GN=GALK1 PE=1 SV=1                                           |
| sp P62820 RAB1A_HUMAN | HUMAN | Ras-related protein Rab-1A OS=Homo sapiens OX=9606 GN=RAB1A PE=1 SV=3                              |
| sp P25787 PSA2_HUMAN  | HUMAN | Proteasome subunit alpha type-2 OS=Homo sapiens OX=9606 GN=PSMA2 PE=1 SV=2                         |
| sp P50148 GNAQ_HUMAN  | HUMAN | Guanine nucleotide-binding protein G(q) subunit alpha OS=Homo sapiens OX=9606 GN=GNAQ PE=1 SV=4    |
| sp O95297 MPZL1_HUMAN | HUMAN | Myelin protein zero-like protein 1 OS=Homo sapiens OX=9606 GN=MPZL1 PE=1 SV=1                      |
| sp P55160 NCKPL_HUMAN | HUMAN | Nck-associated protein 1-like OS=Homo sapiens OX=9606 GN=NCKAP1L PE=1 SV=3                         |
| sp P27635 RL10_HUMAN  | HUMAN | 60S ribosomal protein L10 OS=Homo sapiens OX=9606 GN=RPL10 PE=1 SV=4                               |
| sp Q15459 SF3A1_HUMAN | HUMAN | Splicing factor 3A subunit 1 OS=Homo sapiens OX=9606 GN=SF3A1 PE=1 SV=1                            |
| sp P16278 BGAL_HUMAN  | HUMAN | Beta-galactosidase OS=Homo sapiens OX=9606 GN=GLB1 PE=1 SV=2                                       |
| sp Q13303 KCAB2_HUMAN | HUMAN | Voltage-gated potassium channel subunit beta-2 OS=Homo sapiens OX=9606 GN=KCAB2 PE=1 SV=2          |
| sp Q9Y678 COPG1_HUMAN | HUMAN | Coatomer subunit gamma-1 OS=Homo sapiens OX=9606 GN=COPG1 PE=1 SV=1                                |
| sp Q13571 LAPM5_HUMAN | HUMAN | Lysosomal-associated transmembrane protein 5 OS=Homo sapiens OX=9606 GN=LAPTM5 PE=1 SV=1           |
| sp Q15020 SART3_HUMAN | HUMAN | Squamous cell carcinoma antigen recognized by T-cells 3 OS=Homo sapiens OX=9606 GN=SART3 PE=1 SV=1 |
| sp P61764 STXB1_HUMAN | HUMAN | Syntaxin-binding protein 1 OS=Homo sapiens OX=9606 GN=STXB1 PE=1 SV=1                              |
| sp P10599 THIO_HUMAN  | HUMAN | Thioredoxin OS=Homo sapiens OX=9606 GN=TXN PE=1 SV=3                                               |
| sp P51159 RB27A_HUMAN | HUMAN | Ras-related protein Rab-27A OS=Homo sapiens OX=9606 GN=RAB27A PE=1 SV=3                            |

|                       |       |                                                                                                          |
|-----------------------|-------|----------------------------------------------------------------------------------------------------------|
| sp Q9NTJ3 SMC4_HUMAN  | HUMAN | Structural maintenance of chromosomes protein 4 OS=Homo sapiens OX=9606 GN=SMC4 PE=1 SV=2                |
| sp Q13683 ITA7_HUMAN  | HUMAN | Integrin alpha-7 OS=Homo sapiens OX=9606 GN=ITGA7 PE=1 SV=3                                              |
| sp Q06033 ITIH3_HUMAN | HUMAN | Inter-alpha-trypsin inhibitor heavy chain H3 OS=Homo sapiens OX=9606 GN=ITIH3 PE=1 SV=2                  |
| sp Q9Y6D6 BIG1_HUMAN  | HUMAN | Brefeldin A-inhibited guanine nucleotide-exchange protein 1 OS=Homo sapiens OX=9606 GN=ARFGEF1 PE=1 SV=2 |
| sp P11171 41_HUMAN    | HUMAN | Protein 4.1 OS=Homo sapiens OX=9606 GN=EPB41 PE=1 SV=4                                                   |
| sp P19338 NUCL_HUMAN  | HUMAN | Nucleolin OS=Homo sapiens OX=9606 GN=NCL PE=1 SV=3                                                       |
| sp P42224 STAT1_HUMAN | HUMAN | Signal transducer and activator of transcription 1-alpha/beta OS=Homo sapiens OX=9606 GN=STAT1 PE=1 SV=2 |
| sp P55735 SEC13_HUMAN | HUMAN | Protein SEC13 homolog OS=Homo sapiens OX=9606 GN=SEC13 PE=1 SV=3                                         |
| sp Q8N163 CCAR2_HUMAN | HUMAN | Cell cycle and apoptosis regulator protein 2 OS=Homo sapiens OX=9606 GN=CCAR2 PE=1 SV=2                  |
| sp Q9GZL7 WDR12_HUMAN | HUMAN | Ribosome biogenesis protein WDR12 OS=Homo sapiens OX=9606 GN=WDR12 PE=1 SV=2                             |
| sp O00186 STXB3_HUMAN | HUMAN | Syntaxin-binding protein 3 OS=Homo sapiens OX=9606 GN=STXBP3 PE=1 SV=2                                   |
| sp Q13085 ACACA_HUMAN | HUMAN | Acetyl-CoA carboxylase 1 OS=Homo sapiens OX=9606 GN=ACACA PE=1 SV=2                                      |
| sp P61313 RL15_HUMAN  | HUMAN | 60S ribosomal protein L15 OS=Homo sapiens OX=9606 GN=RPL15 PE=1 SV=2                                     |
| sp P47756 CAPZB_HUMAN | HUMAN | F-actin-capping protein subunit beta OS=Homo sapiens OX=9606 GN=CAPZB PE=1 SV=4                          |
| sp P43405 KSYK_HUMAN  | HUMAN | Tyrosine-protein kinase SYK OS=Homo sapiens OX=9606 GN=SYK PE=1 SV=1                                     |
| sp P15924 DESP_HUMAN  | HUMAN | Desmoplakin OS=Homo sapiens OX=9606 GN=DSP PE=1 SV=3                                                     |
| sp Q8IX19 MCEM1_HUMAN | HUMAN | Mast cell-expressed membrane protein 1 OS=Homo sapiens OX=9606 GN=MCEMP1 PE=1 SV=1                       |
| sp P37837 TALDO_HUMAN | HUMAN | Transaldolase OS=Homo sapiens OX=9606 GN=TALDO1 PE=1 SV=2                                                |
| sp P07339 CATD_HUMAN  | HUMAN | Cathepsin D OS=Homo sapiens OX=9606 GN=CTSD PE=1 SV=1                                                    |
| sp P30041 PRDX6_HUMAN | HUMAN | Peroxiredoxin-6 OS=Homo sapiens OX=9606 GN=PRDX6 PE=1 SV=3                                               |
| sp P08962 CD63_HUMAN  | HUMAN | CD63 antigen OS=Homo sapiens OX=9606 GN=CD63 PE=1 SV=2                                                   |
| sp P61201 CSN2_HUMAN  | HUMAN | COP9 signalosome complex subunit 2 OS=Homo sapiens OX=9606 GN=COPS2 PE=1 SV=1                            |
| sp P10155 RO60_HUMAN  | HUMAN | 60 kDa SS-A/Ro ribonucleoprotein OS=Homo sapiens OX=9606 GN=RO60 PE=1 SV=2                               |
| sp Q13045 FLII_HUMAN  | HUMAN | Protein flightless-1 homolog OS=Homo sapiens OX=9606 GN=FLII PE=1 SV=2                                   |
| sp P09543 CN37_HUMAN  | HUMAN | 2',3'-cyclic-nucleotide 3'-phosphodiesterase OS=Homo sapiens OX=9606 GN=CNP PE=1 SV=2                    |
| sp P50552 VASP_HUMAN  | HUMAN | Vasodilator-stimulated phosphoprotein OS=Homo sapiens OX=9606 GN=VASP PE=1 SV=3                          |
| sp P62942 FKB1A_HUMAN | HUMAN | Peptidyl-prolyl cis-trans isomerase FKBP1A OS=Homo sapiens OX=9606 GN=FKBP1A PE=1 SV=2                   |
| sp P62917 RL8_HUMAN   | HUMAN | 60S ribosomal protein L8 OS=Homo sapiens OX=9606 GN=RPL8 PE=1 SV=2                                       |
| sp P62913 RL11_HUMAN  | HUMAN | 60S ribosomal protein L11 OS=Homo sapiens OX=9606 GN=RPL11 PE=1 SV=2                                     |
| sp P27361 MK03_HUMAN  | HUMAN | Mitogen-activated protein kinase 3 OS=Homo sapiens OX=9606 GN=MAPK3 PE=1 SV=4                            |

|                        |       |                                                                                                                          |
|------------------------|-------|--------------------------------------------------------------------------------------------------------------------------|
| sp Q9BT78 CSN4_HUMAN   | HUMAN | COP9 signalosome complex subunit 4 OS=Homo sapiens OX=9606 GN=COPS4 PE=1 SV=1                                            |
| sp P62854 RS26_HUMAN   | HUMAN | 40S ribosomal protein S26 OS=Homo sapiens OX=9606 GN=RPS26 PE=1 SV=3                                                     |
| sp Q658P3 STEAP3_HUMAN | HUMAN | Metalloreductase STEAP3 OS=Homo sapiens OX=9606 GN=STEAP3 PE=1 SV=2                                                      |
| sp P01889 HLAB_HUMAN   | HUMAN | HLA class I histocompatibility antigen, B alpha chain OS=Homo sapiens OX=9606 GN=HLA-B PE=1 SV=3                         |
| sp Q92930 RAB8B_HUMAN  | HUMAN | Ras-related protein Rab-8B OS=Homo sapiens OX=9606 GN=RAB8B PE=1 SV=2                                                    |
| sp P62834 RAP1A_HUMAN  | HUMAN | Ras-related protein Rap-1A OS=Homo sapiens OX=9606 GN=RAP1A PE=1 SV=1                                                    |
| sp Q15836 VAMP3_HUMAN  | HUMAN | Vesicle-associated membrane protein 3 OS=Homo sapiens OX=9606 GN=VAMP3 PE=1 SV=3                                         |
| sp P46783 RS10_HUMAN   | HUMAN | 40S ribosomal protein S10 OS=Homo sapiens OX=9606 GN=RPS10 PE=1 SV=1                                                     |
| sp P31151 S10A7_HUMAN  | HUMAN | Protein S100-A7 OS=Homo sapiens OX=9606 GN=S100A7 PE=1 SV=4                                                              |
| sp Q9BUL8 PDC10_HUMAN  | HUMAN | Programmed cell death protein 10 OS=Homo sapiens OX=9606 GN=PDCD10 PE=1 SV=1                                             |
| sp Q9BQA1 MEP50_HUMAN  | HUMAN | Methylosome protein 50 OS=Homo sapiens OX=9606 GN=WDR77 PE=1 SV=1                                                        |
| sp Q92522 H1X_HUMAN    | HUMAN | Histone H1x OS=Homo sapiens OX=9606 GN=H1FX PE=1 SV=1                                                                    |
| sp Q13277 STX3_HUMAN   | HUMAN | Syntaxin-3 OS=Homo sapiens OX=9606 GN=STX3 PE=1 SV=3                                                                     |
| sp Q07666 KHDR1_HUMAN  | HUMAN | KH domain-containing, RNA-binding, signal transduction-associated protein 1 OS=Homo sapiens OX=9606 GN=KHDRBS1 PE=1 SV=1 |
| sp P84098 RL19_HUMAN   | HUMAN | 60S ribosomal protein L19 OS=Homo sapiens OX=9606 GN=RPL19 PE=1 SV=1                                                     |
| sp P80723 BASP1_HUMAN  | HUMAN | Brain acid soluble protein 1 OS=Homo sapiens OX=9606 GN=BASP1 PE=1 SV=2                                                  |
| sp P61769 B2MG_HUMAN   | HUMAN | Beta-2-microglobulin OS=Homo sapiens OX=9606 GN=B2M PE=1 SV=1                                                            |
| sp P35268 RL22_HUMAN   | HUMAN | 60S ribosomal protein L22 OS=Homo sapiens OX=9606 GN=RPL22 PE=1 SV=2                                                     |
| sp P30273 FCERG_HUMAN  | HUMAN | High affinity immunoglobulin epsilon receptor subunit gamma OS=Homo sapiens OX=9606 GN=FCER1G PE=1 SV=1                  |
| sp P28074 PSB5_HUMAN   | HUMAN | Proteasome subunit beta type-5 OS=Homo sapiens OX=9606 GN=PSMB5 PE=1 SV=3                                                |
| sp P28072 PSB6_HUMAN   | HUMAN | Proteasome subunit beta type-6 OS=Homo sapiens OX=9606 GN=PSMB6 PE=1 SV=4                                                |
| sp P14174 MIF_HUMAN    | HUMAN | Macrophage migration inhibitory factor OS=Homo sapiens OX=9606 GN=MIF PE=1 SV=4                                          |
| sp P08670 VIME_HUMAN   | HUMAN | Vimentin OS=Homo sapiens OX=9606 GN=VIM PE=1 SV=4                                                                        |
| sp O75608 LYPA1_HUMAN  | HUMAN | Acyl-protein thioesterase 1 OS=Homo sapiens OX=9606 GN=LYPLA1 PE=1 SV=1                                                  |
| sp O15511 ARPC5_HUMAN  | HUMAN | Actin-related protein 2/3 complex subunit 5 OS=Homo sapiens OX=9606 GN=ARPC5 PE=1 SV=3                                   |
| sp Q16563 SYPL1_HUMAN  | HUMAN | Synaptophysin-like protein 1 OS=Homo sapiens OX=9606 GN=SYPL1 PE=1 SV=1                                                  |
| sp Q9H223 EHD4_HUMAN   | HUMAN | EH domain-containing protein 4 OS=Homo sapiens OX=9606 GN=EHD4 PE=1 SV=1                                                 |
| sp P40926 MDHM_HUMAN   | HUMAN | Malate dehydrogenase, mitochondrial OS=Homo sapiens OX=9606 GN=MDH2 PE=1 SV=3                                            |
| sp Q9UBV8 PEF1_HUMAN   | HUMAN | Peflin OS=Homo sapiens OX=9606 GN=PEF1 PE=1 SV=1                                                                         |
| sp P11021 BIP_HUMAN    | HUMAN | Endoplasmic reticulum chaperone BiP OS=Homo sapiens OX=9606 GN=HSPA5 PE=1 SV=2                                           |

|                        |       |                                                                                               |
|------------------------|-------|-----------------------------------------------------------------------------------------------|
| sp Q15286 RAB35_HUMAN  | HUMAN | Ras-related protein Rab-35 OS=Homo sapiens OX=9606 GN=RAB35 PE=1 SV=1                         |
| sp Q9NQC3 RTN4_HUMAN   | HUMAN | Reticulon-4 OS=Homo sapiens OX=9606 GN=RTN4 PE=1 SV=2                                         |
| sp P30086 PEBP1_HUMAN  | HUMAN | Phosphatidylethanolamine-binding protein 1 OS=Homo sapiens OX=9606 GN=PEBP1 PE=1 SV=3         |
| sp Q14103 HNRPD_HUMAN  | HUMAN | Heterogeneous nuclear ribonucleoprotein D0 OS=Homo sapiens OX=9606 GN=HNRNPD PE=1 SV=1        |
| sp Q71UM5 RS27L_HUMAN  | HUMAN | 40S ribosomal protein S27-like OS=Homo sapiens OX=9606 GN=RPS27L PE=1 SV=3                    |
| sp O14579 COPE_HUMAN   | HUMAN | Coatomer subunit epsilon OS=Homo sapiens OX=9606 GN=COPE PE=1 SV=3                            |
| sp Q9H4E7 DEFI6_HUMAN  | HUMAN | Differentially expressed in FDCP 6 homolog OS=Homo sapiens OX=9606 GN=DEF6 PE=1 SV=1          |
| sp Q12846 STX4_HUMAN   | HUMAN | Syntaxin-4 OS=Homo sapiens OX=9606 GN=STX4 PE=1 SV=2                                          |
| sp P60866 RS20_HUMAN   | HUMAN | 40S ribosomal protein S20 OS=Homo sapiens OX=9606 GN=RPS20 PE=1 SV=1                          |
| sp Q9NQR4 NIT2_HUMAN   | HUMAN | Omega-amidase NIT2 OS=Homo sapiens OX=9606 GN=NIT2 PE=1 SV=1                                  |
| sp P11233 RALA_HUMAN   | HUMAN | Ras-related protein Ral-A OS=Homo sapiens OX=9606 GN=RALA PE=1 SV=1                           |
| sp P46776 RL27A_HUMAN  | HUMAN | 60S ribosomal protein L27a OS=Homo sapiens OX=9606 GN=RPL27A PE=1 SV=2                        |
| sp P68133 ACTS_HUMAN   | HUMAN | Actin, alpha skeletal muscle OS=Homo sapiens OX=9606 GN=ACTA1 PE=1 SV=1                       |
| sp Q9BV40 VAMP8_HUMAN  | HUMAN | Vesicle-associated membrane protein 8 OS=Homo sapiens OX=9606 GN=VAMP8 PE=1 SV=1              |
| sp P61020 RAB5B_HUMAN  | HUMAN | Ras-related protein Rab-5B OS=Homo sapiens OX=9606 GN=RAB5B PE=1 SV=1                         |
| sp O15127 SCAM2_HUMAN  | HUMAN | Secretory carrier-associated membrane protein 2 OS=Homo sapiens OX=9606 GN=SCAMP2 PE=1 SV=2   |
| sp P23284 PPIB_HUMAN   | HUMAN | Peptidyl-prolyl cis-trans isomerase B OS=Homo sapiens OX=9606 GN=PPIB PE=1 SV=2               |
| sp P30740 ILEU_HUMAN   | HUMAN | Leukocyte elastase inhibitor OS=Homo sapiens OX=9606 GN=SERPINB1 PE=1 SV=1                    |
| sp Q8NBI5 S43A3_HUMAN  | HUMAN | Solute carrier family 43 member 3 OS=Homo sapiens OX=9606 GN=SLC43A3 PE=1 SV=2                |
| sp P00749 UROK_HUMAN   | HUMAN | Urokinase-type plasminogen activator OS=Homo sapiens OX=9606 GN=PLAU PE=1 SV=2                |
| sp P54619 AAKG1_HUMAN  | HUMAN | 5'-AMP-activated protein kinase subunit gamma-1 OS=Homo sapiens OX=9606 GN=PRKAG1 PE=1 SV=1   |
| sp Q9HD45 TM9SF3_HUMAN | HUMAN | Transmembrane 9 superfamily member 3 OS=Homo sapiens OX=9606 GN=TM9SF3 PE=1 SV=2              |
| sp O75390 CISY_HUMAN   | HUMAN | Citrate synthase, mitochondrial OS=Homo sapiens OX=9606 GN=CS PE=1 SV=2                       |
| sp Q9UL25 RAB21_HUMAN  | HUMAN | Ras-related protein Rab-21 OS=Homo sapiens OX=9606 GN=RAB21 PE=1 SV=3                         |
| sp P09382 LEG1_HUMAN   | HUMAN | Galectin-1 OS=Homo sapiens OX=9606 GN=LGALS1 PE=1 SV=2                                        |
| sp O00764 PDXK_HUMAN   | HUMAN | Pyridoxal kinase OS=Homo sapiens OX=9606 GN=PDXK PE=1 SV=1                                    |
| sp Q16778 H2B2E_HUMAN  | HUMAN | Histone H2B type 2-E OS=Homo sapiens OX=9606 GN=HIST2H2BE PE=1 SV=3                           |
| sp P28838 AMPL_HUMAN   | HUMAN | Cytosol aminopeptidase OS=Homo sapiens OX=9606 GN=LAP3 PE=1 SV=3                              |
| sp Q96S97 MYADM_HUMAN  | HUMAN | Myeloid-associated differentiation marker OS=Homo sapiens OX=9606 GN=MYADM PE=1 SV=2          |
| sp P51991 ROA3_HUMAN   | HUMAN | Heterogeneous nuclear ribonucleoprotein A3 OS=Homo sapiens OX=9606 GN=HNRNPA3 PE=1 SV=2       |
| sp Q6RW13 ATRAP_HUMAN  | HUMAN | Type-1 angiotensin II receptor-associated protein OS=Homo sapiens OX=9606 GN=AGTRAP PE=1 SV=1 |

|                       |       |                                                                                                                  |
|-----------------------|-------|------------------------------------------------------------------------------------------------------------------|
| sp P37268 FDFT_HUMAN  | HUMAN | Squalene synthase OS=Homo sapiens OX=9606 GN=FDFT1 PE=1 SV=1                                                     |
| sp P68871 HBB_HUMAN   | HUMAN | Hemoglobin subunit beta OS=Homo sapiens OX=9606 GN=HBB PE=1 SV=2                                                 |
| sp P02788 TRFL_HUMAN  | HUMAN | Lactotransferrin OS=Homo sapiens OX=9606 GN=LTF PE=1 SV=6                                                        |
| sp Q8IUE6 H2A2B_HUMAN | HUMAN | Histone H2A type 2-B OS=Homo sapiens OX=9606 GN=HIST2H2AB PE=1 SV=3                                              |
| sp Q14232 EI2BA_HUMAN | HUMAN | Translation initiation factor eIF-2B subunit alpha OS=Homo sapiens OX=9606 GN=EIF2B1 PE=1 SV=1                   |
| sp Q13148 TADBP_HUMAN | HUMAN | TAR DNA-binding protein 43 OS=Homo sapiens OX=9606 GN=TARDBP PE=1 SV=1                                           |
| sp P52272 HNRPM_HUMAN | HUMAN | Heterogeneous nuclear ribonucleoprotein M OS=Homo sapiens OX=9606 GN=HNRNPM PE=1 SV=3                            |
| sp Q00839 HNRPU_HUMAN | HUMAN | Heterogeneous nuclear ribonucleoprotein U OS=Homo sapiens OX=9606 GN=HNRNPU PE=1 SV=6                            |
| sp P49888 ST1E1_HUMAN | HUMAN | Sulfotransferase 1E1 OS=Homo sapiens OX=9606 GN=SULT1E1 PE=1 SV=1                                                |
| sp P24158 PRTN3_HUMAN | HUMAN | Myeloblastin OS=Homo sapiens OX=9606 GN=PRTN3 PE=1 SV=3                                                          |
| sp Q8TBC4 UBA3_HUMAN  | HUMAN | NEDD8-activating enzyme E1 catalytic subunit OS=Homo sapiens OX=9606 GN=UBA3 PE=1 SV=2                           |
| sp P08697 A2AP_HUMAN  | HUMAN | Alpha-2-antiplasmin OS=Homo sapiens OX=9606 GN=SERPINF2 PE=1 SV=3                                                |
| sp P12109 CO6A1_HUMAN | HUMAN | Collagen alpha-1(VI) chain OS=Homo sapiens OX=9606 GN=COL6A1 PE=1 SV=3                                           |
| sp Q86X55 CARM1_HUMAN | HUMAN | Histone-arginine methyltransferase CARM1 OS=Homo sapiens OX=9606 GN=CARM1 PE=1 SV=3                              |
| sp Q04695 K1C17_HUMAN | HUMAN | Keratin, type I cytoskeletal 17 OS=Homo sapiens OX=9606 GN=KRT17 PE=1 SV=2                                       |
| sp P53602 MVD1_HUMAN  | HUMAN | Diphosphomevalonate decarboxylase OS=Homo sapiens OX=9606 GN=MVD PE=1 SV=1                                       |
| sp Q13619 CUL4A_HUMAN | HUMAN | Cullin-4A OS=Homo sapiens OX=9606 GN=CUL4A PE=1 SV=3                                                             |
| sp P22694 KAPCB_HUMAN | HUMAN | cAMP-dependent protein kinase catalytic subunit beta OS=Homo sapiens OX=9606 GN=PRKACB PE=1 SV=2                 |
| sp P15927 RFA2_HUMAN  | HUMAN | Replication protein A 32 kDa subunit OS=Homo sapiens OX=9606 GN=RPA2 PE=1 SV=1                                   |
| sp Q16539 MK14_HUMAN  | HUMAN | Mitogen-activated protein kinase 14 OS=Homo sapiens OX=9606 GN=MAPK14 PE=1 SV=3                                  |
| sp P16150 LEUK_HUMAN  | HUMAN | Leukosialin OS=Homo sapiens OX=9606 GN=SPN PE=1 SV=1                                                             |
| sp P09661 RU2A_HUMAN  | HUMAN | U2 small nuclear ribonucleoprotein A' OS=Homo sapiens OX=9606 GN=SNRPA1 PE=1 SV=2                                |
| sp Q9H4A6 GOLP3_HUMAN | HUMAN | Golgi phosphoprotein 3 OS=Homo sapiens OX=9606 GN=GOLPH3 PE=1 SV=1                                               |
| sp Q9Y639 NPTN_HUMAN  | HUMAN | Neuroplastin OS=Homo sapiens OX=9606 GN=NPTN PE=1 SV=2                                                           |
| sp Q13155 AIMP2_HUMAN | HUMAN | Aminoacyl tRNA synthase complex-interacting multifunctional protein 2 OS=Homo sapiens OX=9606 GN=AIMP2 PE=1 SV=2 |
| sp Q14240 IF4A2_HUMAN | HUMAN | Eukaryotic initiation factor 4A-II OS=Homo sapiens OX=9606 GN=EIF4A2 PE=1 SV=2                                   |
| sp P16949 STMN1_HUMAN | HUMAN | Stathmin OS=Homo sapiens OX=9606 GN=STMN1 PE=1 SV=3                                                              |
| sp O00560 SDCB1_HUMAN | HUMAN | Syntenin-1 OS=Homo sapiens OX=9606 GN=SDCBP PE=1 SV=1                                                            |
| sp Q9Y240 CLC11_HUMAN | HUMAN | C-type lectin domain family 11 member A OS=Homo sapiens OX=9606 GN=CLEC11A PE=1 SV=1                             |
| sp P23258 TBG1_HUMAN  | HUMAN | Tubulin gamma-1 chain OS=Homo sapiens OX=9606 GN=TUBG1 PE=1 SV=2                                                 |

|                       |       |                                                                                                               |
|-----------------------|-------|---------------------------------------------------------------------------------------------------------------|
| sp P78324 SHPS1_HUMAN | HUMAN | Tyrosine-protein phosphatase non-receptor type substrate 1 OS=Homo sapiens OX=9606 GN=SIRPA PE=1 SV=2         |
| sp P09417 DHPR_HUMAN  | HUMAN | Dihydropteridine reductase OS=Homo sapiens OX=9606 GN=QDPR PE=1 SV=2                                          |
| sp Q96FW1 OTUB1_HUMAN | HUMAN | Ubiquitin thioesterase OTUB1 OS=Homo sapiens OX=9606 GN=OTUB1 PE=1 SV=2                                       |
| sp O60506 HNRPQ_HUMAN | HUMAN | Heterogeneous nuclear ribonucleoprotein Q OS=Homo sapiens OX=9606 GN=SYNCRIP PE=1 SV=2                        |
| sp Q04917 1433F_HUMAN | HUMAN | 14-3-3 protein eta OS=Homo sapiens OX=9606 GN=YWHAH PE=1 SV=4                                                 |
| sp Q8NFH3 NUP43_HUMAN | HUMAN | Nucleoporin Nup43 OS=Homo sapiens OX=9606 GN=NUP43 PE=1 SV=1                                                  |
| sp O15431 COPT1_HUMAN | HUMAN | High affinity copper uptake protein 1 OS=Homo sapiens OX=9606 GN=SLC31A1 PE=1 SV=1                            |
| sp Q99733 NP1L4_HUMAN | HUMAN | Nucleosome assembly protein 1-like 4 OS=Homo sapiens OX=9606 GN=NAP1L4 PE=1 SV=1                              |
| sp Q15365 PCBP1_HUMAN | HUMAN | Poly(rC)-binding protein 1 OS=Homo sapiens OX=9606 GN=PCBP1 PE=1 SV=2                                         |
| sp Q04721 NOTC2_HUMAN | HUMAN | Neurogenic locus notch homolog protein 2 OS=Homo sapiens OX=9606 GN=NOTCH2 PE=1 SV=3                          |
| sp Q4KMQ2 ANO6_HUMAN  | HUMAN | Anoctamin-6 OS=Homo sapiens OX=9606 GN=ANO6 PE=1 SV=2                                                         |
| sp P15104 GLNA_HUMAN  | HUMAN | Glutamine synthetase OS=Homo sapiens OX=9606 GN=GLUL PE=1 SV=4                                                |
| sp P62330 ARF6_HUMAN  | HUMAN | ADP-ribosylation factor 6 OS=Homo sapiens OX=9606 GN=ARF6 PE=1 SV=2                                           |
| sp P49720 PSB3_HUMAN  | HUMAN | Proteasome subunit beta type-3 OS=Homo sapiens OX=9606 GN=PSMB3 PE=1 SV=2                                     |
| sp P61970 NTF2_HUMAN  | HUMAN | Nuclear transport factor 2 OS=Homo sapiens OX=9606 GN=NUTF2 PE=1 SV=1                                         |
| sp Q9Y295 DRG1_HUMAN  | HUMAN | Developmentally-regulated GTP-binding protein 1 OS=Homo sapiens OX=9606 GN=DRG1 PE=1 SV=1                     |
| sp P25705 ATPA_HUMAN  | HUMAN | ATP synthase subunit alpha, mitochondrial OS=Homo sapiens OX=9606 GN=ATP5F1A PE=1 SV=1                        |
| sp Q9ULH0 KDIS_HUMAN  | HUMAN | Kinase D-interacting substrate of 220 kDa OS=Homo sapiens OX=9606 GN=KIDINS220 PE=1 SV=3                      |
| sp P25398 RS12_HUMAN  | HUMAN | 40S ribosomal protein S12 OS=Homo sapiens OX=9606 GN=RPS12 PE=1 SV=3                                          |
| sp P09455 RET1_HUMAN  | HUMAN | Retinol-binding protein 1 OS=Homo sapiens OX=9606 GN=RBP1 PE=1 SV=2                                           |
| sp P18077 RL35A_HUMAN | HUMAN | 60S ribosomal protein L35a OS=Homo sapiens OX=9606 GN=RPL35A PE=1 SV=2                                        |
| sp P46778 RL21_HUMAN  | HUMAN | 60S ribosomal protein L21 OS=Homo sapiens OX=9606 GN=RPL21 PE=1 SV=2                                          |
| sp P30626 SORCN_HUMAN | HUMAN | Sorcin OS=Homo sapiens OX=9606 GN=SRI PE=1 SV=1                                                               |
| sp P03973 SLPI_HUMAN  | HUMAN | Antileukoproteinase OS=Homo sapiens OX=9606 GN=SLPI PE=1 SV=2                                                 |
| sp P22732 GTR5_HUMAN  | HUMAN | Solute carrier family 2, facilitated glucose transporter member 5 OS=Homo sapiens OX=9606 GN=SLC2A5 PE=1 SV=1 |
| sp P04004 VTNC_HUMAN  | HUMAN | Vitronectin OS=Homo sapiens OX=9606 GN=VTN PE=1 SV=1                                                          |
| sp P27986 P85A_HUMAN  | HUMAN | Phosphatidylinositol 3-kinase regulatory subunit alpha OS=Homo sapiens OX=9606 GN=PIK3R1 PE=1 SV=2            |
| sp O15031 PLXB2_HUMAN | HUMAN | Plexin-B2 OS=Homo sapiens OX=9606 GN=PLXNB2 PE=1 SV=3                                                         |
| sp P24941 CDK2_HUMAN  | HUMAN | Cyclin-dependent kinase 2 OS=Homo sapiens OX=9606 GN=CDK2 PE=1 SV=2                                           |
| sp Q03405 UPAR_HUMAN  | HUMAN | Urokinase plasminogen activator surface receptor OS=Homo sapiens OX=9606 GN=PLAUR PE=1 SV=1                   |

|                       |       |                                                                                                   |
|-----------------------|-------|---------------------------------------------------------------------------------------------------|
| sp P48509 CD151_HUMAN | HUMAN | CD151 antigen OS=Homo sapiens OX=9606 GN=CD151 PE=1 SV=3                                          |
| sp P20742 PZP_HUMAN   | HUMAN | Pregnancy zone protein OS=Homo sapiens OX=9606 GN=PZP PE=1 SV=4                                   |
| sp P15559 NQO1_HUMAN  | HUMAN | NAD(P)H dehydrogenase [quinone] 1 OS=Homo sapiens OX=9606 GN=NQO1 PE=1 SV=1                       |
| sp P62906 RL10A_HUMAN | HUMAN | 60S ribosomal protein L10a OS=Homo sapiens OX=9606 GN=RPL10A PE=1 SV=2                            |
| sp P31641 SC6A6_HUMAN | HUMAN | Sodium- and chloride-dependent taurine transporter OS=Homo sapiens OX=9606 GN=SLC6A6 PE=1 SV=2    |
| sp Q15185 TEBP_HUMAN  | HUMAN | Prostaglandin E synthase 3 OS=Homo sapiens OX=9606 GN=PTGES3 PE=1 SV=1                            |
| sp P41240 CSK_HUMAN   | HUMAN | Tyrosine-protein kinase CSK OS=Homo sapiens OX=9606 GN=CSK PE=1 SV=1                              |
| sp Q10588 BST1_HUMAN  | HUMAN | ADP-ribosyl cyclase/cyclic ADP-ribose hydrolase 2 OS=Homo sapiens OX=9606 GN=BST1 PE=1 SV=2       |
| sp O00567 NOP56_HUMAN | HUMAN | Nucleolar protein 56 OS=Homo sapiens OX=9606 GN=NOP56 PE=1 SV=4                                   |
| sp P41227 NAA10_HUMAN | HUMAN | N-alpha-acetyltransferase 10 OS=Homo sapiens OX=9606 GN=NAA10 PE=1 SV=1                           |
| sp Q7L1Q6 BZW1_HUMAN  | HUMAN | Basic leucine zipper and W2 domain-containing protein 1 OS=Homo sapiens OX=9606 GN=BZW1 PE=1 SV=1 |
| sp P08708 RS17_HUMAN  | HUMAN | 40S ribosomal protein S17 OS=Homo sapiens OX=9606 GN=RPS17 PE=1 SV=2                              |
| sp Q5T4S7 UBR4_HUMAN  | HUMAN | E3 ubiquitin-protein ligase UBR4 OS=Homo sapiens OX=9606 GN=UBR4 PE=1 SV=1                        |
| sp Q969U7 PSMG2_HUMAN | HUMAN | Proteasome assembly chaperone 2 OS=Homo sapiens OX=9606 GN=PSMG2 PE=1 SV=1                        |
| sp Q9C0C4 SEM4C_HUMAN | HUMAN | Semaphorin-4C OS=Homo sapiens OX=9606 GN=SEMA4C PE=1 SV=2                                         |
| sp P12268 IMDH2_HUMAN | HUMAN | Inosine-5'-monophosphate dehydrogenase 2 OS=Homo sapiens OX=9606 GN=IMPDH2 PE=1 SV=2              |
| sp Q09161 NCBP1_HUMAN | HUMAN | Nuclear cap-binding protein subunit 1 OS=Homo sapiens OX=9606 GN=NCBP1 PE=1 SV=1                  |
| sp O00161 SNP23_HUMAN | HUMAN | Synaptosomal-associated protein 23 OS=Homo sapiens OX=9606 GN=SNAP23 PE=1 SV=1                    |
| sp Q9Y287 ITM2B_HUMAN | HUMAN | Integral membrane protein 2B OS=Homo sapiens OX=9606 GN=ITM2B PE=1 SV=1                           |
| sp P62491 RB11A_HUMAN | HUMAN | Ras-related protein Rab-11A OS=Homo sapiens OX=9606 GN=RAB11A PE=1 SV=3                           |
| sp Q92616 GCN1_HUMAN  | HUMAN | eIF-2-alpha kinase activator GCN1 OS=Homo sapiens OX=9606 GN=GCN1 PE=1 SV=6                       |
| sp Q9H2K8 TAOK3_HUMAN | HUMAN | Serine/threonine-protein kinase TAO3 OS=Homo sapiens OX=9606 GN=TAOK3 PE=1 SV=2                   |
| sp Q15493 RGN_HUMAN   | HUMAN | Regucalcin OS=Homo sapiens OX=9606 GN=RGN PE=1 SV=1                                               |
| sp P23142 FBLN1_HUMAN | HUMAN | Fibulin-1 OS=Homo sapiens OX=9606 GN=FBLN1 PE=1 SV=4                                              |
| sp Q96QU8 XPO6_HUMAN  | HUMAN | Exportin-6 OS=Homo sapiens OX=9606 GN=XPO6 PE=1 SV=1                                              |
| sp Q01469 FABP5_HUMAN | HUMAN | Fatty acid-binding protein 5 OS=Homo sapiens OX=9606 GN=FABP5 PE=1 SV=3                           |
| sp P61088 UBE2N_HUMAN | HUMAN | Ubiquitin-conjugating enzyme E2 N OS=Homo sapiens OX=9606 GN=UBE2N PE=1 SV=1                      |
| sp P17096 HMGA1_HUMAN | HUMAN | High mobility group protein HMG-I/HMG-Y OS=Homo sapiens OX=9606 GN=HMGA1 PE=1 SV=3                |
| sp O76021 RL1D1_HUMAN | HUMAN | Ribosomal L1 domain-containing protein 1 OS=Homo sapiens OX=9606 GN=RSL1D1 PE=1 SV=3              |
| sp O15126 SCAM1_HUMAN | HUMAN | Secretory carrier-associated membrane protein 1 OS=Homo sapiens OX=9606 GN=SCAMP1 PE=1 SV=2       |
| sp P49755 TMEDA_HUMAN | HUMAN | Transmembrane emp24 domain-containing protein 10 OS=Homo sapiens OX=9606 GN=TMED10 PE=1 SV=2      |

|                       |       |                                                                                                             |
|-----------------------|-------|-------------------------------------------------------------------------------------------------------------|
| sp P62140 PP1B_HUMAN  | HUMAN | Serine/threonine-protein phosphatase PP1-beta catalytic subunit OS=Homo sapiens OX=9606 GN=PPP1CB PE=1 SV=3 |
| sp P15260 INGR1_HUMAN | HUMAN | Interferon gamma receptor 1 OS=Homo sapiens OX=9606 GN=IFNGR1 PE=1 SV=1                                     |
| sp P53990 IST1_HUMAN  | HUMAN | IST1 homolog OS=Homo sapiens OX=9606 GN=IST1 PE=1 SV=1                                                      |
| sp P40121 CAPG_HUMAN  | HUMAN | Macrophage-capping protein OS=Homo sapiens OX=9606 GN=CAPG PE=1 SV=2                                        |
| sp P24666 PPAC_HUMAN  | HUMAN | Low molecular weight phosphotyrosine protein phosphatase OS=Homo sapiens OX=9606 GN=ACP1 PE=1 SV=3          |
| sp Q9GZV4 IF5A2_HUMAN | HUMAN | Eukaryotic translation initiation factor 5A-2 OS=Homo sapiens OX=9606 GN=EIF5A2 PE=1 SV=3                   |
| sp P35443 TSP4_HUMAN  | HUMAN | Thrombospondin-4 OS=Homo sapiens OX=9606 GN=THBS4 PE=1 SV=2                                                 |
| sp P13693 TCTP_HUMAN  | HUMAN | Translationally-controlled tumor protein OS=Homo sapiens OX=9606 GN=TPT1 PE=1 SV=1                          |
| sp Q15555 MARE2_HUMAN | HUMAN | Microtubule-associated protein RP/EB family member 2 OS=Homo sapiens OX=9606 GN=MAPRE2 PE=1 SV=1            |
| sp Q00577 PURA_HUMAN  | HUMAN | Transcriptional activator protein Pur-alpha OS=Homo sapiens OX=9606 GN=PURA PE=1 SV=2                       |
| sp P48059 LIMS1_HUMAN | HUMAN | LIM and senescent cell antigen-like-containing domain protein 1 OS=Homo sapiens OX=9606 GN=LIMS1 PE=1 SV=4  |
| sp Q06203 PUR1_HUMAN  | HUMAN | Amidophosphoribosyltransferase OS=Homo sapiens OX=9606 GN=PPAT PE=1 SV=1                                    |
| sp Q9NY35 CLDN1_HUMAN | HUMAN | Claudin domain-containing protein 1 OS=Homo sapiens OX=9606 GN=CLDN1 PE=1 SV=1                              |
| sp Q9NX76 CKLF6_HUMAN | HUMAN | CKLF-like MARVEL transmembrane domain-containing protein 6 OS=Homo sapiens OX=9606 GN=CMTM6 PE=1 SV=1       |
| sp Q02413 DSG1_HUMAN  | HUMAN | Desmoglein-1 OS=Homo sapiens OX=9606 GN=DSG1 PE=1 SV=2                                                      |
| sp Q13564 ULA1_HUMAN  | HUMAN | NEDD8-activating enzyme E1 regulatory subunit OS=Homo sapiens OX=9606 GN=NAE1 PE=1 SV=1                     |
| sp Q92478 CLC2B_HUMAN | HUMAN | C-type lectin domain family 2 member B OS=Homo sapiens OX=9606 GN=CLEC2B PE=1 SV=2                          |
| sp P01008 ANT3_HUMAN  | HUMAN | Antithrombin-III OS=Homo sapiens OX=9606 GN=SERPINC1 PE=1 SV=1                                              |
| sp O76094 SRP72_HUMAN | HUMAN | Signal recognition particle subunit SRP72 OS=Homo sapiens OX=9606 GN=SRP72 PE=1 SV=3                        |
| sp P17252 KPCA_HUMAN  | HUMAN | Protein kinase C alpha type OS=Homo sapiens OX=9606 GN=PRKCA PE=1 SV=4                                      |
| sp O60701 UGDH_HUMAN  | HUMAN | UDP-glucose 6-dehydrogenase OS=Homo sapiens OX=9606 GN=UGDH PE=1 SV=1                                       |
| sp Q9BUD6 SPON2_HUMAN | HUMAN | Spondin-2 OS=Homo sapiens OX=9606 GN=SPON2 PE=1 SV=3                                                        |
| sp P80303 NUCB2_HUMAN | HUMAN | Nucleobindin-2 OS=Homo sapiens OX=9606 GN=NUCB2 PE=1 SV=3                                                   |
| sp P30825 SL7A1_HUMAN | HUMAN | High affinity cationic amino acid transporter 1 OS=Homo sapiens OX=9606 GN=SLC7A1 PE=1 SV=1                 |
| sp Q08722 CD47_HUMAN  | HUMAN | Leukocyte surface antigen CD47 OS=Homo sapiens OX=9606 GN=CD47 PE=1 SV=1                                    |
| sp P16152 CBR1_HUMAN  | HUMAN | Carbonyl reductase [NADPH] 1 OS=Homo sapiens OX=9606 GN=CBR1 PE=1 SV=3                                      |
| sp Q9NVJ2 ARL8B_HUMAN | HUMAN | ADP-ribosylation factor-like protein 8B OS=Homo sapiens OX=9606 GN=ARL8B PE=1 SV=1                          |
| sp Q8IZP2 ST134_HUMAN | HUMAN | Putative protein FAM10A4 OS=Homo sapiens OX=9606 GN=ST13P4 PE=5 SV=1                                        |

|                       |       |                                                                                                     |
|-----------------------|-------|-----------------------------------------------------------------------------------------------------|
| sp P62273 RS29_HUMAN  | HUMAN | 40S ribosomal protein S29 OS=Homo sapiens OX=9606 GN=RPS29 PE=1 SV=2                                |
| sp P40925 MDHC_HUMAN  | HUMAN | Malate dehydrogenase, cytoplasmic OS=Homo sapiens OX=9606 GN=MDH1 PE=1 SV=4                         |
| sp O00743 PPP6_HUMAN  | HUMAN | Serine/threonine-protein phosphatase 6 catalytic subunit OS=Homo sapiens OX=9606 GN=PPP6C PE=1 SV=1 |
| sp P49840 GSK3A_HUMAN | HUMAN | Glycogen synthase kinase-3 alpha OS=Homo sapiens OX=9606 GN=GSK3A PE=1 SV=2                         |
| sp Q08J23 NSUN2_HUMAN | HUMAN | RNA cytosine C(5)-methyltransferase NSUN2 OS=Homo sapiens OX=9606 GN=NSUN2 PE=1 SV=2                |
| sp Q8IZA0 K319L_HUMAN | HUMAN | Dyslexia-associated protein KIAA0319-like protein OS=Homo sapiens OX=9606 GN=KIAA0319L PE=1 SV=2    |
| sp P58335 ANTR2_HUMAN | HUMAN | Anthrax toxin receptor 2 OS=Homo sapiens OX=9606 GN=ANTXR2 PE=1 SV=5                                |
| sp P68400 CSK21_HUMAN | HUMAN | Casein kinase II subunit alpha OS=Homo sapiens OX=9606 GN=CSNK2A1 PE=1 SV=1                         |
| sp P29401 TKT_HUMAN   | HUMAN | Transketolase OS=Homo sapiens OX=9606 GN=TKT PE=1 SV=3                                              |
| sp Q99816 TS101_HUMAN | HUMAN | Tumor susceptibility gene 101 protein OS=Homo sapiens OX=9606 GN=TSG101 PE=1 SV=2                   |
| sp Q99497 PARK7_HUMAN | HUMAN | Protein/nucleic acid deglycase DJ-1 OS=Homo sapiens OX=9606 GN=PARK7 PE=1 SV=2                      |
| sp Q10471 GALT2_HUMAN | HUMAN | Polypeptide N-acetylgalactosaminyltransferase 2 OS=Homo sapiens OX=9606 GN=GALNT2 PE=1 SV=1         |
| sp Q9NP79 VTA1_HUMAN  | HUMAN | Vacuolar protein sorting-associated protein VTA1 homolog OS=Homo sapiens OX=9606 GN=VTA1 PE=1 SV=1  |
| sp Q9H4B7 TBB1_HUMAN  | HUMAN | Tubulin beta-1 chain OS=Homo sapiens OX=9606 GN=TUBB1 PE=1 SV=1                                     |
| sp Q96C19 EFHD2_HUMAN | HUMAN | EF-hand domain-containing protein D2 OS=Homo sapiens OX=9606 GN=EFHD2 PE=1 SV=1                     |
| sp Q96H20 SNF8_HUMAN  | HUMAN | Vacuolar-sorting protein SNF8 OS=Homo sapiens OX=9606 GN=SNF8 PE=1 SV=1                             |
| sp Q13630 FCL_HUMAN   | HUMAN | GDP-L-fucose synthase OS=Homo sapiens OX=9606 GN=TSTA3 PE=1 SV=1                                    |
| sp Q8N1N4 K2C78_HUMAN | HUMAN | Keratin, type II cytoskeletal 78 OS=Homo sapiens OX=9606 GN=KRT78 PE=1 SV=2                         |
| sp Q15645 PCH2_HUMAN  | HUMAN | Pachytene checkpoint protein 2 homolog OS=Homo sapiens OX=9606 GN=TRIP13 PE=1 SV=2                  |
| sp Q92619 HMHA1_HUMAN | HUMAN | Rho GTPase-activating protein 45 OS=Homo sapiens OX=9606 GN=ARHGAP45 PE=1 SV=2                      |
| sp Q96G01 BICD1_HUMAN | HUMAN | Protein bicaudal D homolog 1 OS=Homo sapiens OX=9606 GN=BICD1 PE=1 SV=3                             |
| sp Q9HAV0 GGB4_HUMAN  | HUMAN | Guanine nucleotide-binding protein subunit beta-4 OS=Homo sapiens OX=9606 GN=GNB4 PE=1 SV=3         |
| sp P07477 TRY1_HUMAN  | HUMAN | Trypsin-1 OS=Homo sapiens OX=9606 GN=PRSS1 PE=1 SV=1                                                |
| sp O60832 DKC1_HUMAN  | HUMAN | H/ACA ribonucleoprotein complex subunit DKC1 OS=Homo sapiens OX=9606 GN=DKC1 PE=1 SV=3              |
| sp Q15043 S39AE_HUMAN | HUMAN | Zinc transporter ZIP14 OS=Homo sapiens OX=9606 GN=SLC39A14 PE=1 SV=3                                |
| sp Q7Z794 K2C1B_HUMAN | HUMAN | Keratin, type II cytoskeletal 1b OS=Homo sapiens OX=9606 GN=KRT77 PE=2 SV=3                         |
| sp P39748 FEN1_HUMAN  | HUMAN | Flap endonuclease 1 OS=Homo sapiens OX=9606 GN=FEN1 PE=1 SV=1                                       |
| sp Q9HAV4 XPO5_HUMAN  | HUMAN | Exportin-5 OS=Homo sapiens OX=9606 GN=XPO5 PE=1 SV=1                                                |
| sp Q9UHD8 SEPT9_HUMAN | HUMAN | Septin-9 OS=Homo sapiens OX=9606 GN=SEPTIN9 PE=1 SV=2                                               |
| sp Q96C86 DCPS_HUMAN  | HUMAN | m7GpppX diphosphatase OS=Homo sapiens OX=9606 GN=DCPS PE=1 SV=2                                     |

|                       |       |                                                                                                                     |
|-----------------------|-------|---------------------------------------------------------------------------------------------------------------------|
| sp P52788 SPSY_HUMAN  | HUMAN | Spermine synthase OS=Homo sapiens OX=9606 GN=SMS PE=1 SV=2                                                          |
| sp P02647 APOA1_HUMAN | HUMAN | Apolipoprotein A-I OS=Homo sapiens OX=9606 GN=APOA1 PE=1 SV=1                                                       |
| sp O60784 TOM1_HUMAN  | HUMAN | Target of Myb protein 1 OS=Homo sapiens OX=9606 GN=TOM1 PE=1 SV=2                                                   |
| sp P01893 HLAH_HUMAN  | HUMAN | Putative HLA class I histocompatibility antigen, alpha chain H OS=Homo sapiens OX=9606 GN=HLA-H PE=5 SV=3           |
| sp P20339 RAB5A_HUMAN | HUMAN | Ras-related protein Rab-5A OS=Homo sapiens OX=9606 GN=RAB5A PE=1 SV=2                                               |
| sp P17844 DDX5_HUMAN  | HUMAN | Probable ATP-dependent RNA helicase DDX5 OS=Homo sapiens OX=9606 GN=DDX5 PE=1 SV=1                                  |
| sp P13929 ENOB_HUMAN  | HUMAN | Beta-enolase OS=Homo sapiens OX=9606 GN=ENO3 PE=1 SV=5                                                              |
| sp P84243 H33_HUMAN   | HUMAN | Histone H3.3 OS=Homo sapiens OX=9606 GN=H3-3A PE=1 SV=2                                                             |
| sp Q9Y3L5 RAP2C_HUMAN | HUMAN | Ras-related protein Rap-2c OS=Homo sapiens OX=9606 GN=RAP2C PE=1 SV=1                                               |
| sp Q08209 PP2BA_HUMAN | HUMAN | Serine/threonine-protein phosphatase 2B catalytic subunit alpha isoform OS=Homo sapiens OX=9606 GN=PPP3CA PE=1 SV=1 |
| sp Q14019 COTL1_HUMAN | HUMAN | Coactosin-like protein OS=Homo sapiens OX=9606 GN=COTL1 PE=1 SV=3                                                   |
| sp Q9H2D6 TARA_HUMAN  | HUMAN | TRIO and F-actin-binding protein OS=Homo sapiens OX=9606 GN=TRIOBP PE=1 SV=3                                        |
| sp Q9NY33 DPP3_HUMAN  | HUMAN | Dipeptidyl peptidase 3 OS=Homo sapiens OX=9606 GN=DPP3 PE=1 SV=2                                                    |
| sp Q9BW27 NUP85_HUMAN | HUMAN | Nuclear pore complex protein Nup85 OS=Homo sapiens OX=9606 GN=NUP85 PE=1 SV=1                                       |
| sp Q99519 NEUR1_HUMAN | HUMAN | Sialidase-1 OS=Homo sapiens OX=9606 GN=NEU1 PE=1 SV=1                                                               |
| sp Q14242 SELPL_HUMAN | HUMAN | P-selectin glycoprotein ligand 1 OS=Homo sapiens OX=9606 GN=SELPLG PE=1 SV=1                                        |
| sp P46439 GSTM5_HUMAN | HUMAN | Glutathione S-transferase Mu 5 OS=Homo sapiens OX=9606 GN=GSTM5 PE=1 SV=3                                           |
| sp P37108 SRP14_HUMAN | HUMAN | Signal recognition particle 14 kDa protein OS=Homo sapiens OX=9606 GN=SRP14 PE=1 SV=2                               |
| sp P31785 IL2RG_HUMAN | HUMAN | Cytokine receptor common subunit gamma OS=Homo sapiens OX=9606 GN=IL2RG PE=1 SV=1                                   |
| sp P20774 MIME_HUMAN  | HUMAN | Mimecan OS=Homo sapiens OX=9606 GN=OGN PE=1 SV=1                                                                    |
| sp P12236 ADT3_HUMAN  | HUMAN | ADP/ATP translocase 3 OS=Homo sapiens OX=9606 GN=SLC25A6 PE=1 SV=4                                                  |
| sp P09467 F16P1_HUMAN | HUMAN | Fructose-1,6-bisphosphatase 1 OS=Homo sapiens OX=9606 GN=FBP1 PE=1 SV=5                                             |
| sp P06734 FCER2_HUMAN | HUMAN | Low affinity immunoglobulin epsilon Fc receptor OS=Homo sapiens OX=9606 GN=FCER2 PE=1 SV=1                          |
| sp P02774 VTDB_HUMAN  | HUMAN | Vitamin D-binding protein OS=Homo sapiens OX=9606 GN=GC PE=1 SV=2                                                   |
| sp P00488 F13A_HUMAN  | HUMAN | Coagulation factor XIII A chain OS=Homo sapiens OX=9606 GN=F13A1 PE=1 SV=4                                          |
| sp Q9Y5P6 GMPPB_HUMAN | HUMAN | Mannose-1-phosphate guanyltransferase beta OS=Homo sapiens OX=9606 GN=GMPPB PE=1 SV=2                               |
| sp Q9Y3B4 SF3B6_HUMAN | HUMAN | Splicing factor 3B subunit 6 OS=Homo sapiens OX=9606 GN=SF3B6 PE=1 SV=1                                             |
| sp Q9Y266 NUDC_HUMAN  | HUMAN | Nuclear migration protein nudC OS=Homo sapiens OX=9606 GN=NUDC PE=1 SV=1                                            |
| sp Q9P1F3 ABRAL_HUMAN | HUMAN | Costars family protein ABRACL OS=Homo sapiens OX=9606 GN=ABRACL PE=1 SV=1                                           |
| sp Q9NY12 GAR1_HUMAN  | HUMAN | H/ACA ribonucleoprotein complex subunit 1 OS=Homo sapiens OX=9606 GN=GAR1 PE=1 SV=1                                 |

|                        |       |                                                                                                      |
|------------------------|-------|------------------------------------------------------------------------------------------------------|
| sp Q9NVP1 DDX18_HUMAN  | HUMAN | ATP-dependent RNA helicase DDX18 OS=Homo sapiens OX=9606 GN=DDX18 PE=1 SV=2                          |
| sp Q9NR31 SAR1A_HUMAN  | HUMAN | GTP-binding protein SAR1a OS=Homo sapiens OX=9606 GN=SAR1A PE=1 SV=1                                 |
| sp Q9HC07 TM165_HUMAN  | HUMAN | Transmembrane protein 165 OS=Homo sapiens OX=9606 GN=TMEM165 PE=1 SV=1                               |
| sp Q9HB07 MYG1_HUMAN   | HUMAN | UPF0160 protein MYG1, mitochondrial OS=Homo sapiens OX=9606 GN=C12orf10 PE=1 SV=2                    |
| sp Q9H9E3 COG4_HUMAN   | HUMAN | Conserved oligomeric Golgi complex subunit 4 OS=Homo sapiens OX=9606 GN=COG4 PE=1 SV=3               |
| sp Q9H4G4 GAPR1_HUMAN  | HUMAN | Golgi-associated plant pathogenesis-related protein 1 OS=Homo sapiens OX=9606 GN=GLIPR2 PE=1 SV=3    |
| sp Q9H3K6 BOLA2_HUMAN  | HUMAN | Bola-like protein 2 OS=Homo sapiens OX=9606 GN=BOLA2 PE=1 SV=1                                       |
| sp Q9GZM5 YIPF3_HUMAN  | HUMAN | Protein YIPF3 OS=Homo sapiens OX=9606 GN=YIPF3 PE=1 SV=1                                             |
| sp Q9C0H2 TTYH3_HUMAN  | HUMAN | Protein tweety homolog 3 OS=Homo sapiens OX=9606 GN=TTYH3 PE=1 SV=3                                  |
| sp Q9BPX5 ARP5L_HUMAN  | HUMAN | Actin-related protein 2/3 complex subunit 5-like protein OS=Homo sapiens OX=9606 GN=ARPC5L PE=1 SV=1 |
| sp Q96KP4 CNDP2_HUMAN  | HUMAN | Cytosolic non-specific dipeptidase OS=Homo sapiens OX=9606 GN=CNDP2 PE=1 SV=2                        |
| sp Q969X1 LFG3_HUMAN   | HUMAN | Protein lifeguard 3 OS=Homo sapiens OX=9606 GN=TMBIM1 PE=1 SV=2                                      |
| sp Q92820 GGH_HUMAN    | HUMAN | Gamma-glutamyl hydrolase OS=Homo sapiens OX=9606 GN=GGH PE=1 SV=2                                    |
| sp Q8TCT8 SPP2A_HUMAN  | HUMAN | Signal peptide peptidase-like 2A OS=Homo sapiens OX=9606 GN=SPPL2A PE=1 SV=2                         |
| sp Q8N339 MT1M_HUMAN   | HUMAN | Metallothionein-1M OS=Homo sapiens OX=9606 GN=MT1M PE=3 SV=2                                         |
| sp Q86VN1 VPS36_HUMAN  | HUMAN | Vacuolar protein-sorting-associated protein 36 OS=Homo sapiens OX=9606 GN=VPS36 PE=1 SV=1            |
| sp Q6L8Q7 PDE12_HUMAN  | HUMAN | 2',5'-phosphodiesterase 12 OS=Homo sapiens OX=9606 GN=PDE12 PE=1 SV=2                                |
| sp Q6DKI2 LEG9C_HUMAN  | HUMAN | Galectin-9C OS=Homo sapiens OX=9606 GN=LGALS9C PE=1 SV=2                                             |
| sp Q13907 IDI1_HUMAN   | HUMAN | Isopentenyl-diphosphate Delta-isomerase 1 OS=Homo sapiens OX=9606 GN=IDI1 PE=1 SV=2                  |
| sp Q10589 BST2_HUMAN   | HUMAN | Bone marrow stromal antigen 2 OS=Homo sapiens OX=9606 GN=BST2 PE=1 SV=1                              |
| sp Q08334 IL10R2_HUMAN | HUMAN | Interleukin-10 receptor subunit beta OS=Homo sapiens OX=9606 GN=IL10RB PE=1 SV=2                     |
| sp Q01629 IFM2_HUMAN   | HUMAN | Interferon-induced transmembrane protein 2 OS=Homo sapiens OX=9606 GN=IFITM2 PE=1 SV=2               |
| sp P62841 RS15_HUMAN   | HUMAN | 40S ribosomal protein S15 OS=Homo sapiens OX=9606 GN=RPS15 PE=1 SV=2                                 |
| sp P62266 RS23_HUMAN   | HUMAN | 40S ribosomal protein S23 OS=Homo sapiens OX=9606 GN=RPS23 PE=1 SV=3                                 |
| sp P58546 MTPN_HUMAN   | HUMAN | Myotrophin OS=Homo sapiens OX=9606 GN=MTPN PE=1 SV=2                                                 |
| sp P54578 UBP14_HUMAN  | HUMAN | Ubiquitin carboxyl-terminal hydrolase 14 OS=Homo sapiens OX=9606 GN=USP14 PE=1 SV=3                  |
| sp P49795 RGS19_HUMAN  | HUMAN | Regulator of G-protein signaling 19 OS=Homo sapiens OX=9606 GN=RGS19 PE=1 SV=1                       |
| sp P35244 RFA3_HUMAN   | HUMAN | Replication protein A 14 kDa subunit OS=Homo sapiens OX=9606 GN=RPA3 PE=1 SV=1                       |
| sp P31949 S10AB_HUMAN  | HUMAN | Protein S100-A11 OS=Homo sapiens OX=9606 GN=S100A11 PE=1 SV=2                                        |
| sp P31350 RIR2_HUMAN   | HUMAN | Ribonucleoside-diphosphate reductase subunit M2 OS=Homo sapiens OX=9606 GN=RRM2 PE=1 SV=1            |

|                        |       |                                                                                                                  |
|------------------------|-------|------------------------------------------------------------------------------------------------------------------|
| sp P28676 GRAN_HUMAN   | HUMAN | Grancalcin OS=Homo sapiens OX=9606 GN=GCA PE=1 SV=2                                                              |
| sp P28161 GSTM2_HUMAN  | HUMAN | Glutathione S-transferase Mu 2 OS=Homo sapiens OX=9606 GN=GSTM2 PE=1 SV=2                                        |
| sp P24071 FCAR_HUMAN   | HUMAN | Immunoglobulin alpha Fc receptor OS=Homo sapiens OX=9606 GN=FCAR PE=1 SV=1                                       |
| sp P15151 PVR_HUMAN    | HUMAN | Poliovirus receptor OS=Homo sapiens OX=9606 GN=PVR PE=1 SV=2                                                     |
| sp P05546 HEP2_HUMAN   | HUMAN | Heparin cofactor 2 OS=Homo sapiens OX=9606 GN=SERPIND1 PE=1 SV=3                                                 |
| sp P05543 THBG_HUMAN   | HUMAN | Thyroxine-binding globulin OS=Homo sapiens OX=9606 GN=SERPINA7 PE=1 SV=2                                         |
| sp P05386 RLA1_HUMAN   | HUMAN | 60S acidic ribosomal protein P1 OS=Homo sapiens OX=9606 GN=RPLP1 PE=1 SV=1                                       |
| sp P00441 SODC_HUMAN   | HUMAN | Superoxide dismutase [Cu-Zn] OS=Homo sapiens OX=9606 GN=SOD1 PE=1 SV=2                                           |
| sp O95456 PSMG1_HUMAN  | HUMAN | Proteasome assembly chaperone 1 OS=Homo sapiens OX=9606 GN=PSMG1 PE=1 SV=1                                       |
| sp O43914 TYOBP_HUMAN  | HUMAN | TYRO protein tyrosine kinase-binding protein OS=Homo sapiens OX=9606 GN=TYOBP PE=1 SV=1                          |
| sp O00391 QSOX1_HUMAN  | HUMAN | Sulfhydryl oxidase 1 OS=Homo sapiens OX=9606 GN=QSOX1 PE=1 SV=3                                                  |
| sp P62993 GRB2_HUMAN   | HUMAN | Growth factor receptor-bound protein 2 OS=Homo sapiens OX=9606 GN=GRB2 PE=1 SV=1                                 |
| sp Q12904 AIMP1_HUMAN  | HUMAN | Aminoacyl tRNA synthase complex-interacting multifunctional protein 1 OS=Homo sapiens OX=9606 GN=AIMP1 PE=1 SV=2 |
| sp P13473 LAMP2_HUMAN  | HUMAN | Lysosome-associated membrane glycoprotein 2 OS=Homo sapiens OX=9606 GN=LAMP2 PE=1 SV=2                           |
| sp Q92979 NEP1_HUMAN   | HUMAN | Ribosomal RNA small subunit methyltransferase NEP1 OS=Homo sapiens OX=9606 GN=EMG1 PE=1 SV=4                     |
| sp P23921 RIR1_HUMAN   | HUMAN | Ribonucleoside-diphosphate reductase large subunit OS=Homo sapiens OX=9606 GN=RRM1 PE=1 SV=1                     |
| sp Q9UNX3 RL26L_HUMAN  | HUMAN | 60S ribosomal protein L26-like 1 OS=Homo sapiens OX=9606 GN=RPL26L1 PE=1 SV=1                                    |
| sp Q8NBZ7 UXS1_HUMAN   | HUMAN | UDP-glucuronic acid decarboxylase 1 OS=Homo sapiens OX=9606 GN=UXS1 PE=1 SV=1                                    |
| sp Q3ZCW2 LEGL_HUMAN   | HUMAN | Galectin-related protein OS=Homo sapiens OX=9606 GN=LGALSL PE=1 SV=2                                             |
| sp P14209 CD99_HUMAN   | HUMAN | CD99 antigen OS=Homo sapiens OX=9606 GN=CD99 PE=1 SV=1                                                           |
| sp Q9HA64 KT3K_HUMAN   | HUMAN | Ketosamine-3-kinase OS=Homo sapiens OX=9606 GN=FN3KRP PE=1 SV=2                                                  |
| sp Q9UNP9 PPIE_HUMAN   | HUMAN | Peptidyl-prolyl cis-trans isomerase E OS=Homo sapiens OX=9606 GN=PPIE PE=1 SV=1                                  |
| sp P62308 RUXG_HUMAN   | HUMAN | Small nuclear ribonucleoprotein G OS=Homo sapiens OX=9606 GN=SNRPG PE=1 SV=1                                     |
| sp P40616 ARL1_HUMAN   | HUMAN | ADP-ribosylation factor-like protein 1 OS=Homo sapiens OX=9606 GN=ARL1 PE=1 SV=1                                 |
| sp P31153 METHK2_HUMAN | HUMAN | S-adenosylmethionine synthase isoform type-2 OS=Homo sapiens OX=9606 GN=MAT2A PE=1 SV=1                          |
| sp Q15382 RHEB_HUMAN   | HUMAN | GTP-binding protein Rheb OS=Homo sapiens OX=9606 GN=RHEB PE=1 SV=1                                               |
| sp P24534 EF1B_HUMAN   | HUMAN | Elongation factor 1-beta OS=Homo sapiens OX=9606 GN=EEF1B2 PE=1 SV=3                                             |
| sp P39019 RS19_HUMAN   | HUMAN | 40S ribosomal protein S19 OS=Homo sapiens OX=9606 GN=RPS19 PE=1 SV=2                                             |
| sp P62857 RS28_HUMAN   | HUMAN | 40S ribosomal protein S28 OS=Homo sapiens OX=9606 GN=RPS28 PE=1 SV=1                                             |
| sp P02656 APOC3_HUMAN  | HUMAN | Apolipoprotein C-III OS=Homo sapiens OX=9606 GN=APOC3 PE=1 SV=1                                                  |

|                        |       |                                                                                                          |
|------------------------|-------|----------------------------------------------------------------------------------------------------------|
| sp Q93096 TP4A1_HUMAN  | HUMAN | Protein tyrosine phosphatase type IVA 1 OS=Homo sapiens OX=9606 GN=PTP4A1 PE=1 SV=2                      |
| sp O15145 ARPC3_HUMAN  | HUMAN | Actin-related protein 2/3 complex subunit 3 OS=Homo sapiens OX=9606 GN=ARPC3 PE=1 SV=3                   |
| sp P30043 BLVRB_HUMAN  | HUMAN | Flavin reductase (NADPH) OS=Homo sapiens OX=9606 GN=BLVRB PE=1 SV=3                                      |
| sp P42345 MTOR_HUMAN   | HUMAN | Serine/threonine-protein kinase mTOR OS=Homo sapiens OX=9606 GN=MTOR PE=1 SV=1                           |
| sp Q13443 ADAM9_HUMAN  | HUMAN | Disintegrin and metalloproteinase domain-containing protein 9 OS=Homo sapiens OX=9606 GN=ADAM9 PE=1 SV=1 |
| sp P61081 UBC12_HUMAN  | HUMAN | NEDD8-conjugating enzyme Ubc12 OS=Homo sapiens OX=9606 GN=UBE2M PE=1 SV=1                                |
| sp P48506 GSH1_HUMAN   | HUMAN | Glutamate--cysteine ligase catalytic subunit OS=Homo sapiens OX=9606 GN=GCLC PE=1 SV=2                   |
| sp Q14314 FGL2_HUMAN   | HUMAN | Fibroblast growth factor OS=Homo sapiens OX=9606 GN=FGL2 PE=1 SV=1                                       |
| sp Q13283 G3BP1_HUMAN  | HUMAN | Ras GTPase-activating protein-binding protein 1 OS=Homo sapiens OX=9606 GN=G3BP1 PE=1 SV=1               |
| sp O75131 CPNE3_HUMAN  | HUMAN | Copine-3 OS=Homo sapiens OX=9606 GN=CPNE3 PE=1 SV=1                                                      |
| sp P28065 PSB9_HUMAN   | HUMAN | Proteasome subunit beta type-9 OS=Homo sapiens OX=9606 GN=PSMB9 PE=1 SV=2                                |
| sp Q9P289 STK26_HUMAN  | HUMAN | Serine/threonine-protein kinase 26 OS=Homo sapiens OX=9606 GN=STK26 PE=1 SV=2                            |
| sp Q14376 GALE_HUMAN   | HUMAN | UDP-glucose 4-epimerase OS=Homo sapiens OX=9606 GN=GALE PE=1 SV=2                                        |
| sp Q15819 UBE2V2_HUMAN | HUMAN | Ubiquitin-conjugating enzyme E2 variant 2 OS=Homo sapiens OX=9606 GN=UBE2V2 PE=1 SV=4                    |
| sp O15400 STX7_HUMAN   | HUMAN | Syntaxin-7 OS=Homo sapiens OX=9606 GN=STX7 PE=1 SV=4                                                     |
| sp P47755 CAZA2_HUMAN  | HUMAN | F-actin-capping protein subunit alpha-2 OS=Homo sapiens OX=9606 GN=CAPZA2 PE=1 SV=3                      |
| sp P84103 SRSF3_HUMAN  | HUMAN | Serine/arginine-rich splicing factor 3 OS=Homo sapiens OX=9606 GN=SRSF3 PE=1 SV=1                        |
| sp P18031 PTN1_HUMAN   | HUMAN | Tyrosine-protein phosphatase non-receptor type 1 OS=Homo sapiens OX=9606 GN=PTPN1 PE=1 SV=1              |
| sp P67870 CSK2B_HUMAN  | HUMAN | Casein kinase II subunit beta OS=Homo sapiens OX=9606 GN=CSNK2B PE=1 SV=1                                |
| sp Q13547 HDAC1_HUMAN  | HUMAN | Histone deacetylase 1 OS=Homo sapiens OX=9606 GN=HDAC1 PE=1 SV=1                                         |
| sp P60981 DEST_HUMAN   | HUMAN | Destrin OS=Homo sapiens OX=9606 GN=DSTN PE=1 SV=3                                                        |
| sp O15160 RPAC1_HUMAN  | HUMAN | DNA-directed RNA polymerases I and III subunit RPAC1 OS=Homo sapiens OX=9606 GN=POLR1C PE=1 SV=1         |
| sp P60709 ACTB_HUMAN   | HUMAN | Actin, cytoplasmic 1 OS=Homo sapiens OX=9606 GN=ACTB PE=1 SV=1                                           |
| sp O75718 CRTAP_HUMAN  | HUMAN | Cartilage-associated protein OS=Homo sapiens OX=9606 GN=CRTAP PE=1 SV=1                                  |
| sp Q99436 PSB7_HUMAN   | HUMAN | Proteasome subunit beta type-7 OS=Homo sapiens OX=9606 GN=PSMB7 PE=1 SV=1                                |
| sp P52895 AK1C2_HUMAN  | HUMAN | Aldo-keto reductase family 1 member C2 OS=Homo sapiens OX=9606 GN=AKR1C2 PE=1 SV=3                       |
| sp O94979 SEC31A_HUMAN | HUMAN | Protein transport protein Sec31A OS=Homo sapiens OX=9606 GN=SEC31A PE=1 SV=3                             |
| sp P25054 APC_HUMAN    | HUMAN | Adenomatous polyposis coli protein OS=Homo sapiens OX=9606 GN=APC PE=1 SV=2                              |
| sp Q8IZP0 ABI1_HUMAN   | HUMAN | Abl interactor 1 OS=Homo sapiens OX=9606 GN=ABI1 PE=1 SV=4                                               |
| sp P11049 CD37_HUMAN   | HUMAN | Leukocyte antigen CD37 OS=Homo sapiens OX=9606 GN=CD37 PE=1 SV=2                                         |

|                       |       |                                                                                                        |
|-----------------------|-------|--------------------------------------------------------------------------------------------------------|
| sp Q9BUJ2 HNRL1_HUMAN | HUMAN | Heterogeneous nuclear ribonucleoprotein U-like protein 1 OS=Homo sapiens OX=9606 GN=HNRNPUL1 PE=1 SV=2 |
| sp Q6XQN6 PNCB_HUMAN  | HUMAN | Nicotinate phosphoribosyltransferase OS=Homo sapiens OX=9606 GN=NAPRT PE=1 SV=2                        |
| sp P23469 PTPRE_HUMAN | HUMAN | Receptor-type tyrosine-protein phosphatase epsilon OS=Homo sapiens OX=9606 GN=PTPRE PE=1 SV=1          |
| sp P62829 RL23_HUMAN  | HUMAN | 60S ribosomal protein L23 OS=Homo sapiens OX=9606 GN=RPL23 PE=1 SV=1                                   |
| sp Q01650 LAT1_HUMAN  | HUMAN | Large neutral amino acids transporter small subunit 1 OS=Homo sapiens OX=9606 GN=SLC7A5 PE=1 SV=2      |
| sp P37235 HPCL1_HUMAN | HUMAN | Hippocalcin-like protein 1 OS=Homo sapiens OX=9606 GN=HPCAL1 PE=1 SV=3                                 |
| sp Q9BQ67 GRWD1_HUMAN | HUMAN | Glutamate-rich WD repeat-containing protein 1 OS=Homo sapiens OX=9606 GN=GRWD1 PE=1 SV=1               |
| sp Q99828 CIB1_HUMAN  | HUMAN | Calcium and integrin-binding protein 1 OS=Homo sapiens OX=9606 GN=CIB1 PE=1 SV=4                       |
| sp P54852 EMP3_HUMAN  | HUMAN | Epithelial membrane protein 3 OS=Homo sapiens OX=9606 GN=EMP3 PE=1 SV=1                                |
| sp Q93077 H2A1C_HUMAN | HUMAN | Histone H2A type 1-C OS=Homo sapiens OX=9606 GN=HIST1H2AC PE=1 SV=3                                    |
| sp P02751 FINC_HUMAN  | HUMAN | Fibronectin OS=Homo sapiens OX=9606 GN=FN1 PE=1 SV=5                                                   |
| sp Q8N3D4 EH1L1_HUMAN | HUMAN | EH domain-binding protein 1-like protein 1 OS=Homo sapiens OX=9606 GN=EHBP1L1 PE=1 SV=2                |
| sp P62750 RL23A_HUMAN | HUMAN | 60S ribosomal protein L23a OS=Homo sapiens OX=9606 GN=RPL23A PE=1 SV=1                                 |
| sp P02675 FIBB_HUMAN  | HUMAN | Fibrinogen beta chain OS=Homo sapiens OX=9606 GN=FGB PE=1 SV=2                                         |
| sp O75347 TBCA_HUMAN  | HUMAN | Tubulin-specific chaperone A OS=Homo sapiens OX=9606 GN=TBCA PE=1 SV=3                                 |
| sp Q92900 RENT1_HUMAN | HUMAN | Regulator of nonsense transcripts 1 OS=Homo sapiens OX=9606 GN=UPF1 PE=1 SV=2                          |
| sp P27695 APEX1_HUMAN | HUMAN | DNA-(apurinic or apyrimidinic site) lyase OS=Homo sapiens OX=9606 GN=APEX1 PE=1 SV=2                   |
| sp P81605 DCD_HUMAN   | HUMAN | Dermcidin OS=Homo sapiens OX=9606 GN=DCD PE=1 SV=2                                                     |
| sp P26447 S10A4_HUMAN | HUMAN | Protein S100-A4 OS=Homo sapiens OX=9606 GN=S100A4 PE=1 SV=1                                            |
| sp P04080 CYTB_HUMAN  | HUMAN | Cystatin-B OS=Homo sapiens OX=9606 GN=CSTB PE=1 SV=2                                                   |
| sp Q9BXJ4 C1QT3_HUMAN | HUMAN | Complement C1q tumor necrosis factor-related protein 3 OS=Homo sapiens OX=9606 GN=C1QTNF3 PE=1 SV=1    |
| sp P02765 FETUA_HUMAN | HUMAN | Alpha-2-HS-glycoprotein OS=Homo sapiens OX=9606 GN=AHSG PE=1 SV=2                                      |
| sp P09497 CLCB_HUMAN  | HUMAN | Clathrin light chain B OS=Homo sapiens OX=9606 GN=CLTB PE=1 SV=1                                       |
| sp Q9H832 UBE2Z_HUMAN | HUMAN | Ubiquitin-conjugating enzyme E2 Z OS=Homo sapiens OX=9606 GN=UBE2Z PE=1 SV=2                           |
| sp Q96EC8 YIPF6_HUMAN | HUMAN | Protein YIPF6 OS=Homo sapiens OX=9606 GN=YIPF6 PE=1 SV=2                                               |
| sp Q99571 P2RX4_HUMAN | HUMAN | P2X purinoceptor 4 OS=Homo sapiens OX=9606 GN=P2RX4 PE=1 SV=2                                          |
| sp Q13033 STRN3_HUMAN | HUMAN | Striatin-3 OS=Homo sapiens OX=9606 GN=STRN3 PE=1 SV=3                                                  |
| sp P62837 UB2D2_HUMAN | HUMAN | Ubiquitin-conjugating enzyme E2 D2 OS=Homo sapiens OX=9606 GN=UBE2D2 PE=1 SV=1                         |
| sp O43660 PLRG1_HUMAN | HUMAN | Pleiotropic regulator 1 OS=Homo sapiens OX=9606 GN=PLRG1 PE=1 SV=1                                     |
| sp P31946 1433B_HUMAN | HUMAN | 14-3-3 protein beta/alpha OS=Homo sapiens OX=9606 GN=YWHAB PE=1 SV=3                                   |

|                       |       |                                                                                                            |
|-----------------------|-------|------------------------------------------------------------------------------------------------------------|
| sp Q9Y6W3 CAN7_HUMAN  | HUMAN | Calpain-7 OS=Homo sapiens OX=9606 GN=CAPN7 PE=1 SV=1                                                       |
| sp Q9Y4Z0 LSM4_HUMAN  | HUMAN | U6 snRNA-associated Sm-like protein LSm4 OS=Homo sapiens OX=9606 GN=LSM4 PE=1 SV=1                         |
| sp O43252 PAPS1_HUMAN | HUMAN | Bifunctional 3'-phosphoadenosine 5'-phosphosulfate synthase 1 OS=Homo sapiens OX=9606 GN=PAPSS1 PE=1 SV=2  |
| sp Q14141 SEPT6_HUMAN | HUMAN | Septin-6 OS=Homo sapiens OX=9606 GN=SEPTIN6 PE=1 SV=4                                                      |
| sp P10644 KAP0_HUMAN  | HUMAN | cAMP-dependent protein kinase type I-alpha regulatory subunit OS=Homo sapiens OX=9606 GN=PRKAR1A PE=1 SV=1 |
| sp Q92621 NU205_HUMAN | HUMAN | Nuclear pore complex protein Nup205 OS=Homo sapiens OX=9606 GN=NUP205 PE=1 SV=3                            |
| sp Q9NR19 ACSA_HUMAN  | HUMAN | Acetyl-coenzyme A synthetase, cytoplasmic OS=Homo sapiens OX=9606 GN=ACSS2 PE=1 SV=1                       |

## B) Proteomics Analysis of U937 CDNs

| Accession #           | Species | Name                                                                                      |
|-----------------------|---------|-------------------------------------------------------------------------------------------|
| sp P49327 FAS_HUMAN   | HUMAN   | Fatty acid synthase OS=Homo sapiens OX=9606 GN=FASN PE=1 SV=3                             |
| sp P78527 PRKDC_HUMAN | HUMAN   | DNA-dependent protein kinase catalytic subunit OS=Homo sapiens OX=9606 GN=PRKDC PE=1 SV=3 |
| sp P08238 HS90B_HUMAN | HUMAN   | Heat shock protein HSP 90-beta OS=Homo sapiens OX=9606 GN=HSP90AB1 PE=1 SV=4              |
| sp P21333 FLNA_HUMAN  | HUMAN   | Filamin-A OS=Homo sapiens OX=9606 GN=FLNA PE=1 SV=4                                       |
| sp Q14204 DYHC1_HUMAN | HUMAN   | Cytoplasmic dynein 1 heavy chain 1 OS=Homo sapiens OX=9606 GN=DYNC1H1 PE=1 SV=5           |
| sp Q9Y490 TLN1_HUMAN  | HUMAN   | Talin-1 OS=Homo sapiens OX=9606 GN=TLN1 PE=1 SV=3                                         |
| sp P35579 MYH9_HUMAN  | HUMAN   | Myosin-9 OS=Homo sapiens OX=9606 GN=MYH9 PE=1 SV=4                                        |
| sp P07814 SYEP_HUMAN  | HUMAN   | Bifunctional glutamate/proline--tRNA ligase OS=Homo sapiens OX=9606 GN=EPRS1 PE=1 SV=5    |
| sp P06733 ENOA_HUMAN  | HUMAN   | Alpha-enolase OS=Homo sapiens OX=9606 GN=ENO1 PE=1 SV=2                                   |
| sp P13639 EF2_HUMAN   | HUMAN   | Elongation factor 2 OS=Homo sapiens OX=9606 GN=EEF2 PE=1 SV=4                             |
| sp P14618 KPYM_HUMAN  | HUMAN   | Pyruvate kinase PKM OS=Homo sapiens OX=9606 GN=PKM PE=1 SV=4                              |
| sp P08133 ANXA6_HUMAN | HUMAN   | Annexin A6 OS=Homo sapiens OX=9606 GN=ANXA6 PE=1 SV=3                                     |
| sp Q00610 CLH1_HUMAN  | HUMAN   | Clathrin heavy chain 1 OS=Homo sapiens OX=9606 GN=CLTC PE=1 SV=5                          |
| sp P26038 MOES_HUMAN  | HUMAN   | Moesin OS=Homo sapiens OX=9606 GN=MSN PE=1 SV=3                                           |
| sp P00558 PGK1_HUMAN  | HUMAN   | Phosphoglycerate kinase 1 OS=Homo sapiens OX=9606 GN=PGK1 PE=1 SV=3                       |
| sp P53396 ACLY_HUMAN  | HUMAN   | ATP-citrate synthase OS=Homo sapiens OX=9606 GN=ACLY PE=1 SV=3                            |
| sp P55072 TERA_HUMAN  | HUMAN   | Transitional endoplasmic reticulum ATPase OS=Homo sapiens OX=9606 GN=VCP PE=1 SV=4        |
| sp P11142 HSP7C_HUMAN | HUMAN   | Heat shock cognate 71 kDa protein OS=Homo sapiens OX=9606 GN=HSPA8 PE=1 SV=1              |
| sp O43707 ACTN4_HUMAN | HUMAN   | Alpha-actinin-4 OS=Homo sapiens OX=9606 GN=ACTN4 PE=1 SV=2                                |
| sp P46940 IQGA1_HUMAN | HUMAN   | Ras GTPase-activating-like protein IQGAP1 OS=Homo sapiens OX=9606 GN=IQGAP1 PE=1 SV=1     |
| sp P22314 UBA1_HUMAN  | HUMAN   | Ubiquitin-like modifier-activating enzyme 1 OS=Homo sapiens OX=9606 GN=UBA1 PE=1 SV=3     |
| sp P07237 PDIA1_HUMAN | HUMAN   | Protein disulfide-isomerase OS=Homo sapiens OX=9606 GN=P4HB PE=1 SV=3                     |
| sp P13796 PLSL_HUMAN  | HUMAN   | Plastin-2 OS=Homo sapiens OX=9606 GN=LCP1 PE=1 SV=6                                       |
| sp P04075 ALDOA_HUMAN | HUMAN   | Fructose-bisphosphate aldolase A OS=Homo sapiens OX=9606 GN=ALDOA PE=1 SV=2               |
| sp P49588 SYAC_HUMAN  | HUMAN   | Alanine--tRNA ligase, cytoplasmic OS=Homo sapiens OX=9606 GN=AARS1 PE=1 SV=2              |
| sp P78371 TCPB_HUMAN  | HUMAN   | T-complex protein 1 subunit beta OS=Homo sapiens OX=9606 GN=CCT2 PE=1 SV=4                |
| sp P04406 G3P_HUMAN   | HUMAN   | Glyceraldehyde-3-phosphate dehydrogenase OS=Homo sapiens OX=9606 GN=GAPDH PE=1 SV=3       |
| sp P48643 TCPE_HUMAN  | HUMAN   | T-complex protein 1 subunit epsilon OS=Homo sapiens OX=9606 GN=CCT5 PE=1 SV=1             |

|                       |       |                                                                                                 |
|-----------------------|-------|-------------------------------------------------------------------------------------------------|
| sp P31939 PUR9_HUMAN  | HUMAN | Bifunctional purine biosynthesis protein PURH OS=Homo sapiens OX=9606 GN=ATIC PE=1 SV=3         |
| sp P07437 TBB5_HUMAN  | HUMAN | Tubulin beta chain OS=Homo sapiens OX=9606 GN=TUBB PE=1 SV=2                                    |
| sp P26640 SYVC_HUMAN  | HUMAN | Valine--tRNA ligase OS=Homo sapiens OX=9606 GN=VAR51 PE=1 SV=4                                  |
| sp P10809 CH60_HUMAN  | HUMAN | 60 kDa heat shock protein, mitochondrial OS=Homo sapiens OX=9606 GN=HSPD1 PE=1 SV=2             |
| sp P50395 GDIB_HUMAN  | HUMAN | Rab GDP dissociation inhibitor beta OS=Homo sapiens OX=9606 GN=GDI2 PE=1 SV=2                   |
| sp P50990 TCPQ_HUMAN  | HUMAN | T-complex protein 1 subunit theta OS=Homo sapiens OX=9606 GN=CCT8 PE=1 SV=4                     |
| sp P63261 ACTG_HUMAN  | HUMAN | Actin, cytoplasmic 2 OS=Homo sapiens OX=9606 GN=ACTG1 PE=1 SV=1                                 |
| sp P49368 TCPG_HUMAN  | HUMAN | T-complex protein 1 subunit gamma OS=Homo sapiens OX=9606 GN=CCT3 PE=1 SV=4                     |
| sp Q99832 TCPH_HUMAN  | HUMAN | T-complex protein 1 subunit eta OS=Homo sapiens OX=9606 GN=CCT7 PE=1 SV=2                       |
| sp P54577 SYYC_HUMAN  | HUMAN | Tyrosine--tRNA ligase, cytoplasmic OS=Homo sapiens OX=9606 GN=YARS1 PE=1 SV=4                   |
| sp Q86VP6 CAND1_HUMAN | HUMAN | Cullin-associated NEDD8-dissociated protein 1 OS=Homo sapiens OX=9606 GN=CAND1 PE=1 SV=2        |
| sp Q01518 CAP1_HUMAN  | HUMAN | Adenylyl cyclase-associated protein 1 OS=Homo sapiens OX=9606 GN=CAP1 PE=1 SV=5                 |
| sp P07900 HS90A_HUMAN | HUMAN | Heat shock protein HSP 90-alpha OS=Homo sapiens OX=9606 GN=HSP90AA1 PE=1 SV=5                   |
| sp P06737 PYGL_HUMAN  | HUMAN | Glycogen phosphorylase, liver form OS=Homo sapiens OX=9606 GN=PYGL PE=1 SV=4                    |
| sp P29144 TPP2_HUMAN  | HUMAN | Tripeptidyl-peptidase 2 OS=Homo sapiens OX=9606 GN=TPP2 PE=1 SV=4                               |
| sp Q13451 FKBP5_HUMAN | HUMAN | Peptidyl-prolyl cis-trans isomerase FKBP5 OS=Homo sapiens OX=9606 GN=FKBP5 PE=1 SV=2            |
| sp P11021 BIP_HUMAN   | HUMAN | Endoplasmic reticulum chaperone BiP OS=Homo sapiens OX=9606 GN=HSPA5 PE=1 SV=2                  |
| sp P19338 NUCL_HUMAN  | HUMAN | Nucleolin OS=Homo sapiens OX=9606 GN=NCL PE=1 SV=3                                              |
| sp P68104 EF1A1_HUMAN | HUMAN | Elongation factor 1-alpha 1 OS=Homo sapiens OX=9606 GN=EEF1A1 PE=1 SV=1                         |
| sp O00410 IPO5_HUMAN  | HUMAN | Importin-5 OS=Homo sapiens OX=9606 GN=IPO5 PE=1 SV=4                                            |
| sp P11586 C1TC_HUMAN  | HUMAN | C-1-tetrahydrofolate synthase, cytoplasmic OS=Homo sapiens OX=9606 GN=MTHFD1 PE=1 SV=3          |
| sp P31948 STIP1_HUMAN | HUMAN | Stress-induced-phosphoprotein 1 OS=Homo sapiens OX=9606 GN=STIP1 PE=1 SV=1                      |
| sp P68363 TBA1B_HUMAN | HUMAN | Tubulin alpha-1B chain OS=Homo sapiens OX=9606 GN=TUBA1B PE=1 SV=1                              |
| sp P13010 XRCC5_HUMAN | HUMAN | X-ray repair cross-complementing protein 5 OS=Homo sapiens OX=9606 GN=XRCC5 PE=1 SV=3           |
| sp P25205 MCM3_HUMAN  | HUMAN | DNA replication licensing factor MCM3 OS=Homo sapiens OX=9606 GN=MCM3 PE=1 SV=3                 |
| sp P06744 G6PI_HUMAN  | HUMAN | Glucose-6-phosphate isomerase OS=Homo sapiens OX=9606 GN=GPI PE=1 SV=4                          |
| sp P22102 PUR2_HUMAN  | HUMAN | Trifunctional purine biosynthetic protein adenosine-3 OS=Homo sapiens OX=9606 GN=GART PE=1 SV=1 |
| sp P55786 PSA_HUMAN   | HUMAN | Puromycin-sensitive aminopeptidase OS=Homo sapiens OX=9606 GN=NPEPPS PE=1 SV=2                  |
| sp P00338 LDHA_HUMAN  | HUMAN | L-lactate dehydrogenase A chain OS=Homo sapiens OX=9606 GN=LDHA PE=1 SV=2                       |
| sp P27708 PYR1_HUMAN  | HUMAN | CAD protein OS=Homo sapiens OX=9606 GN=CAD PE=1 SV=3                                            |
| sp P29401 TKT_HUMAN   | HUMAN | Transketolase OS=Homo sapiens OX=9606 GN=TKT PE=1 SV=3                                          |

|                       |       |                                                                                                 |
|-----------------------|-------|-------------------------------------------------------------------------------------------------|
| sp Q92598 HS105_HUMAN | HUMAN | Heat shock protein 105 kDa OS=Homo sapiens OX=9606 GN=HSPH1 PE=1 SV=1                           |
| sp Q9P2J5 SYLC_HUMAN  | HUMAN | Leucine--tRNA ligase, cytoplasmic OS=Homo sapiens OX=9606 GN=LARS1 PE=1 SV=2                    |
| sp P07355 ANXA2_HUMAN | HUMAN | Annexin A2 OS=Homo sapiens OX=9606 GN=ANXA2 PE=1 SV=2                                           |
| sp P63104 1433Z_HUMAN | HUMAN | 14-3-3 protein zeta/delta OS=Homo sapiens OX=9606 GN=YWHAZ PE=1 SV=1                            |
| sp P33991 MCM4_HUMAN  | HUMAN | DNA replication licensing factor MCM4 OS=Homo sapiens OX=9606 GN=MCM4 PE=1 SV=5                 |
| sp P49736 MCM2_HUMAN  | HUMAN | DNA replication licensing factor MCM2 OS=Homo sapiens OX=9606 GN=MCM2 PE=1 SV=4                 |
| sp O15067 PUR4_HUMAN  | HUMAN | Phosphoribosylformylglycinamide synthase OS=Homo sapiens OX=9606 GN=PFAS PE=1 SV=4              |
| sp O75369 FLNB_HUMAN  | HUMAN | Filamin-B OS=Homo sapiens OX=9606 GN=FLNB PE=1 SV=2                                             |
| sp Q14152 EIF3A_HUMAN | HUMAN | Eukaryotic translation initiation factor 3 subunit A OS=Homo sapiens OX=9606 GN=EIF3A PE=1 SV=1 |
| sp P31146 COR1A_HUMAN | HUMAN | Coronin-1A OS=Homo sapiens OX=9606 GN=CORO1A PE=1 SV=4                                          |
| sp Q7Z6Z7 HUWE1_HUMAN | HUMAN | E3 ubiquitin-protein ligase HUWE1 OS=Homo sapiens OX=9606 GN=HUWE1 PE=1 SV=3                    |
| sp P52209 6PGD_HUMAN  | HUMAN | 6-phosphogluconate dehydrogenase, decarboxylating OS=Homo sapiens OX=9606 GN=PGD PE=1 SV=3      |
| sp P18669 PGAM1_HUMAN | HUMAN | Phosphoglycerate mutase 1 OS=Homo sapiens OX=9606 GN=PGAM1 PE=1 SV=2                            |
| sp P26639 SYTC_HUMAN  | HUMAN | Threonine--tRNA ligase 1, cytoplasmic OS=Homo sapiens OX=9606 GN=TARS1 PE=1 SV=3                |
| sp P12956 XRCC6_HUMAN | HUMAN | X-ray repair cross-complementing protein 6 OS=Homo sapiens OX=9606 GN=XRCC6 PE=1 SV=2           |
| sp P50991 TCPD_HUMAN  | HUMAN | T-complex protein 1 subunit delta OS=Homo sapiens OX=9606 GN=CCT4 PE=1 SV=4                     |
| sp P41252 SYIC_HUMAN  | HUMAN | Isoleucine--tRNA ligase, cytoplasmic OS=Homo sapiens OX=9606 GN=IARS1 PE=1 SV=2                 |
| sp P33993 MCM7_HUMAN  | HUMAN | DNA replication licensing factor MCM7 OS=Homo sapiens OX=9606 GN=MCM7 PE=1 SV=4                 |
| sp Q02790 FKBP4_HUMAN | HUMAN | Peptidyl-prolyl cis-trans isomerase FKBP4 OS=Homo sapiens OX=9606 GN=FKBP4 PE=1 SV=3            |
| sp Q16555 DPYL2_HUMAN | HUMAN | Dihydropyrimidinase-related protein 2 OS=Homo sapiens OX=9606 GN=DPYSL2 PE=1 SV=1               |
| sp P41250 GARS_HUMAN  | HUMAN | Glycine--tRNA ligase OS=Homo sapiens OX=9606 GN=GARS1 PE=1 SV=3                                 |
| sp P04264 K2C1_HUMAN  | HUMAN | Keratin, type II cytoskeletal 1 OS=Homo sapiens OX=9606 GN=KRT1 PE=1 SV=6                       |
| sp P40227 TCPZ_HUMAN  | HUMAN | T-complex protein 1 subunit zeta OS=Homo sapiens OX=9606 GN=CCT6A PE=1 SV=3                     |
| sp P17987 TCPA_HUMAN  | HUMAN | T-complex protein 1 subunit alpha OS=Homo sapiens OX=9606 GN=TCP1 PE=1 SV=1                     |
| sp P04040 CATA_HUMAN  | HUMAN | Catalase OS=Homo sapiens OX=9606 GN=CAT PE=1 SV=3                                               |
| sp P23396 RS3_HUMAN   | HUMAN | 40S ribosomal protein S3 OS=Homo sapiens OX=9606 GN=RPS3 PE=1 SV=2                              |
| sp O60506 HNRPO_HUMAN | HUMAN | Heterogeneous nuclear ribonucleoprotein Q OS=Homo sapiens OX=9606 GN=SYNCRIP PE=1 SV=2          |
| sp P0DMV9 HS71B_HUMAN | HUMAN | Heat shock 70 kDa protein 1B OS=Homo sapiens OX=9606 GN=HSPA1B PE=1 SV=1                        |
| sp Q8WUM4 PDC6I_HUMAN | HUMAN | Programmed cell death 6-interacting protein OS=Homo sapiens OX=9606 GN=PDIC6I PE=1 SV=1         |
| sp P30101 PDIA3_HUMAN | HUMAN | Protein disulfide-isomerase A3 OS=Homo sapiens OX=9606 GN=PDIA3 PE=1 SV=4                       |
| sp P47897 SYQ_HUMAN   | HUMAN | Glutamine--tRNA ligase OS=Homo sapiens OX=9606 GN=QARS1 PE=1 SV=1                               |

|                       |       |                                                                                                                                |
|-----------------------|-------|--------------------------------------------------------------------------------------------------------------------------------|
| sp P12814 ACTN1_HUMAN | HUMAN | Alpha-actinin-1 OS=Homo sapiens OX=9606 GN=ACTN1 PE=1 SV=2                                                                     |
| sp P30153 2AAA_HUMAN  | HUMAN | Serine/threonine-protein phosphatase 2A 65 kDa regulatory subunit A alpha isoform OS=Homo sapiens OX=9606 GN=PPP2R1A PE=1 SV=4 |
| sp P23381 SYWC_HUMAN  | HUMAN | Tryptophan--tRNA ligase, cytoplasmic OS=Homo sapiens OX=9606 GN=WARS1 PE=1 SV=2                                                |
| sp P07195 LDHB_HUMAN  | HUMAN | L-lactate dehydrogenase B chain OS=Homo sapiens OX=9606 GN=LDHB PE=1 SV=2                                                      |
| sp P12268 IMDH2_HUMAN | HUMAN | Inosine-5'-monophosphate dehydrogenase 2 OS=Homo sapiens OX=9606 GN=IMPDH2 PE=1 SV=2                                           |
| sp Q9H4A4 AMPB_HUMAN  | HUMAN | Aminopeptidase B OS=Homo sapiens OX=9606 GN=RNPEP PE=1 SV=2                                                                    |
| sp P23526 SAHH_HUMAN  | HUMAN | Adenosylhomocysteinase OS=Homo sapiens OX=9606 GN=AHCY PE=1 SV=4                                                               |
| sp P33992 MCM5_HUMAN  | HUMAN | DNA replication licensing factor MCM5 OS=Homo sapiens OX=9606 GN=MCM5 PE=1 SV=5                                                |
| sp P60174 TPIS_HUMAN  | HUMAN | Triosephosphate isomerase OS=Homo sapiens OX=9606 GN=TPI1 PE=1 SV=3                                                            |
| sp Q13263 TIF1B_HUMAN | HUMAN | Transcription intermediary factor 1-beta OS=Homo sapiens OX=9606 GN=TRIM28 PE=1 SV=5                                           |
| sp P05455 LA_HUMAN    | HUMAN | Lupus La protein OS=Homo sapiens OX=9606 GN=SSB PE=1 SV=2                                                                      |
| sp Q92616 GCN1_HUMAN  | HUMAN | eIF-2-alpha kinase activator GCN1 OS=Homo sapiens OX=9606 GN=GCN1 PE=1 SV=6                                                    |
| sp Q99460 PSMD1_HUMAN | HUMAN | 26S proteasome non-ATPase regulatory subunit 1 OS=Homo sapiens OX=9606 GN=PSMD1 PE=1 SV=2                                      |
| sp Q9UQ80 PA2G4_HUMAN | HUMAN | Proliferation-associated protein 2G4 OS=Homo sapiens OX=9606 GN=PA2G4 PE=1 SV=3                                                |
| sp P18206 VINC_HUMAN  | HUMAN | Vinculin OS=Homo sapiens OX=9606 GN=VCL PE=1 SV=4                                                                              |
| sp P34932 HSP74_HUMAN | HUMAN | Heat shock 70 kDa protein 4 OS=Homo sapiens OX=9606 GN=HSPA4 PE=1 SV=4                                                         |
| sp O43776 SYNC_HUMAN  | HUMAN | Asparagine--tRNA ligase, cytoplasmic OS=Homo sapiens OX=9606 GN=NARS1 PE=1 SV=1                                                |
| sp Q14697 GANAB_HUMAN | HUMAN | Neutral alpha-glucosidase AB OS=Homo sapiens OX=9606 GN=GANAB PE=1 SV=3                                                        |
| sp Q14974 IMB1_HUMAN  | HUMAN | Importin subunit beta-1 OS=Homo sapiens OX=9606 GN=KPNB1 PE=1 SV=2                                                             |
| sp Q14566 MCM6_HUMAN  | HUMAN | DNA replication licensing factor MCM6 OS=Homo sapiens OX=9606 GN=MCM6 PE=1 SV=1                                                |
| sp O75874 IDHC_HUMAN  | HUMAN | Isocitrate dehydrogenase [NADP] cytoplasmic OS=Homo sapiens OX=9606 GN=IDH1 PE=1 SV=2                                          |
| sp Q7KZF4 SND1_HUMAN  | HUMAN | Staphylococcal nuclease domain-containing protein 1 OS=Homo sapiens OX=9606 GN=SND1 PE=1 SV=1                                  |
| sp P61158 ARP3_HUMAN  | HUMAN | Actin-related protein 3 OS=Homo sapiens OX=9606 GN=ACTR3 PE=1 SV=3                                                             |
| sp P06753 TPM3_HUMAN  | HUMAN | Tropomyosin alpha-3 chain OS=Homo sapiens OX=9606 GN=TPM3 PE=1 SV=2                                                            |
| sp O43175 SERA_HUMAN  | HUMAN | D-3-phosphoglycerate dehydrogenase OS=Homo sapiens OX=9606 GN=PHGDH PE=1 SV=4                                                  |
| sp P36871 PGM1_HUMAN  | HUMAN | Phosphoglucomutase-1 OS=Homo sapiens OX=9606 GN=PGM1 PE=1 SV=3                                                                 |
| sp P14625 ENPL_HUMAN  | HUMAN | Endoplasmic reticulum protein OS=Homo sapiens OX=9606 GN=HSP90B1 PE=1 SV=1                                                     |
| sp P09874 PARP1_HUMAN | HUMAN | Poly [ADP-ribose] polymerase 1 OS=Homo sapiens OX=9606 GN=PARP1 PE=1 SV=4                                                      |
| sp P09960 LKHA4_HUMAN | HUMAN | Leukotriene A-4 hydrolase OS=Homo sapiens OX=9606 GN=LTA4H PE=1 SV=2                                                           |
| sp P28838 AMPL_HUMAN  | HUMAN | Cytosol aminopeptidase OS=Homo sapiens OX=9606 GN=LAP3 PE=1 SV=3                                                               |

|                       |       |                                                                                               |
|-----------------------|-------|-----------------------------------------------------------------------------------------------|
| sp P60842 IF4A1_HUMAN | HUMAN | Eukaryotic initiation factor 4A-I OS=Homo sapiens OX=9606 GN=EIF4A1 PE=1 SV=1                 |
| sp P04083 ANXA1_HUMAN | HUMAN | Annexin A1 OS=Homo sapiens OX=9606 GN=ANXA1 PE=1 SV=2                                         |
| sp Q06830 PRDX1_HUMAN | HUMAN | Peroxiredoxin-1 OS=Homo sapiens OX=9606 GN=PRDX1 PE=1 SV=1                                    |
| sp Q9Y617 SERC_HUMAN  | HUMAN | Phosphoserine aminotransferase OS=Homo sapiens OX=9606 GN=PSAT1 PE=1 SV=2                     |
| sp Q01813 PFKAP_HUMAN | HUMAN | ATP-dependent 6-phosphofructokinase, platelet type OS=Homo sapiens OX=9606 GN=PFKP PE=1 SV=2  |
| sp P48147 PPCE_HUMAN  | HUMAN | Prolyl endopeptidase OS=Homo sapiens OX=9606 GN=PREP PE=1 SV=2                                |
| sp P09429 HMGB1_HUMAN | HUMAN | High mobility group protein B1 OS=Homo sapiens OX=9606 GN=HMGB1 PE=1 SV=3                     |
| sp P53621 COPA_HUMAN  | HUMAN | Coatomer subunit alpha OS=Homo sapiens OX=9606 GN=COPA PE=1 SV=2                              |
| sp P05120 PAI2_HUMAN  | HUMAN | Plasminogen activator inhibitor 2 OS=Homo sapiens OX=9606 GN=SERPINB2 PE=1 SV=2               |
| sp P22234 PUR6_HUMAN  | HUMAN | Multifunctional protein ADE2 OS=Homo sapiens OX=9606 GN=PAICS PE=1 SV=3                       |
| sp P14868 SYDC_HUMAN  | HUMAN | Aspartate--tRNA ligase, cytoplasmic OS=Homo sapiens OX=9606 GN=DARS1 PE=1 SV=2                |
| sp P00491 PNPH_HUMAN  | HUMAN | Purine nucleoside phosphorylase OS=Homo sapiens OX=9606 GN=PNP PE=1 SV=2                      |
| sp Q08211 DHX9_HUMAN  | HUMAN | ATP-dependent RNA helicase A OS=Homo sapiens OX=9606 GN=DHX9 PE=1 SV=4                        |
| sp O00299 CLIC1_HUMAN | HUMAN | Chloride intracellular channel protein 1 OS=Homo sapiens OX=9606 GN=CLIC1 PE=1 SV=4           |
| sp Q6XQN6 PNCB_HUMAN  | HUMAN | Nicotinate phosphoribosyltransferase OS=Homo sapiens OX=9606 GN=NAPRT PE=1 SV=2               |
| sp P36578 RL4_HUMAN   | HUMAN | 60S ribosomal protein L4 OS=Homo sapiens OX=9606 GN=RPL4 PE=1 SV=5                            |
| sp P40926 MDHM_HUMAN  | HUMAN | Malate dehydrogenase, mitochondrial OS=Homo sapiens OX=9606 GN=MDH2 PE=1 SV=3                 |
| sp P08758 ANXA5_HUMAN | HUMAN | Annexin A5 OS=Homo sapiens OX=9606 GN=ANXA5 PE=1 SV=2                                         |
| sp P62258 1433E_HUMAN | HUMAN | 14-3-3 protein epsilon OS=Homo sapiens OX=9606 GN=YWHAE PE=1 SV=1                             |
| sp P54136 SYRC_HUMAN  | HUMAN | Arginine--tRNA ligase, cytoplasmic OS=Homo sapiens OX=9606 GN=RARS1 PE=1 SV=2                 |
| sp P46777 RL5_HUMAN   | HUMAN | 60S ribosomal protein L5 OS=Homo sapiens OX=9606 GN=RPL5 PE=1 SV=3                            |
| sp O14980 XPO1_HUMAN  | HUMAN | Exportin-1 OS=Homo sapiens OX=9606 GN=XPO1 PE=1 SV=1                                          |
| sp Q09666 AHNK_HUMAN  | HUMAN | Neuroblast differentiation-associated protein AHNK OS=Homo sapiens OX=9606 GN=AHNAK PE=1 SV=2 |
| sp P13489 RINI_HUMAN  | HUMAN | Ribonuclease inhibitor OS=Homo sapiens OX=9606 GN=RNH1 PE=1 SV=2                              |
| sp P62937 PIIA_HUMAN  | HUMAN | Peptidyl-prolyl cis-trans isomerase A OS=Homo sapiens OX=9606 GN=PPIA PE=1 SV=2               |
| sp P49915 GUAA_HUMAN  | HUMAN | GMP synthase [glutamine-hydrolyzing] OS=Homo sapiens OX=9606 GN=GMPS PE=1 SV=1                |
| sp P23528 COF1_HUMAN  | HUMAN | Cofilin-1 OS=Homo sapiens OX=9606 GN=CFL1 PE=1 SV=3                                           |
| sp P07737 PROF1_HUMAN | HUMAN | Profilin-1 OS=Homo sapiens OX=9606 GN=PFN1 PE=1 SV=2                                          |
| sp P29350 PTN6_HUMAN  | HUMAN | Tyrosine-protein phosphatase non-receptor type 6 OS=Homo sapiens OX=9606 GN=PTPN6 PE=1 SV=1   |
| sp Q15046 SYK_HUMAN   | HUMAN | Lysine--tRNA ligase OS=Homo sapiens OX=9606 GN=KARS1 PE=1 SV=3                                |
| sp Q16543 CDC37_HUMAN | HUMAN | Hsp90 co-chaperone Cdc37 OS=Homo sapiens OX=9606 GN=CDC37 PE=1 SV=1                           |

|                       |       |                                                                                                           |
|-----------------------|-------|-----------------------------------------------------------------------------------------------------------|
| sp P52566 GDIR2_HUMAN | HUMAN | Rho GDP-dissociation inhibitor 2 OS=Homo sapiens OX=9606 GN=ARHGDIB PE=1 SV=3                             |
| sp Q86UX7 URP2_HUMAN  | HUMAN | Fermitin family homolog 3 OS=Homo sapiens OX=9606 GN=FERMT3 PE=1 SV=1                                     |
| sp P21399 ACOC_HUMAN  | HUMAN | Cytoplasmic aconitate hydratase OS=Homo sapiens OX=9606 GN=ACO1 PE=1 SV=3                                 |
| sp P40925 MDHC_HUMAN  | HUMAN | Malate dehydrogenase, cytoplasmic OS=Homo sapiens OX=9606 GN=MDH1 PE=1 SV=4                               |
| sp Q96KP4 CNDP2_HUMAN | HUMAN | Cytosolic non-specific dipeptidase OS=Homo sapiens OX=9606 GN=CNDP2 PE=1 SV=2                             |
| sp P39687 AN32A_HUMAN | HUMAN | Acidic leucine-rich nuclear phosphoprotein 32 family member A OS=Homo sapiens OX=9606 GN=ANP32A PE=1 SV=1 |
| sp Q99497 PARK7_HUMAN | HUMAN | Protein/nucleic acid deglycase DJ-1 OS=Homo sapiens OX=9606 GN=PARK7 PE=1 SV=2                            |
| sp P38646 GRP75_HUMAN | HUMAN | Stress-70 protein, mitochondrial OS=Homo sapiens OX=9606 GN=HSPA9 PE=1 SV=2                               |
| sp P11940 PABP1_HUMAN | HUMAN | Polyadenylate-binding protein 1 OS=Homo sapiens OX=9606 GN=PABPC1 PE=1 SV=2                               |
| sp Q16531 DDB1_HUMAN  | HUMAN | DNA damage-binding protein 1 OS=Homo sapiens OX=9606 GN=DDB1 PE=1 SV=1                                    |
| sp O75083 WDR1_HUMAN  | HUMAN | WD repeat-containing protein 1 OS=Homo sapiens OX=9606 GN=WDR1 PE=1 SV=4                                  |
| sp P27348 1433T_HUMAN | HUMAN | 14-3-3 protein theta OS=Homo sapiens OX=9606 GN=YWHAQ PE=1 SV=1                                           |
| sp O43143 DHX15_HUMAN | HUMAN | Pre-mRNA-splicing factor ATP-dependent RNA helicase DHX15 OS=Homo sapiens OX=9606 GN=DHX15 PE=1 SV=2      |
| sp P55884 EIF3B_HUMAN | HUMAN | Eukaryotic translation initiation factor 3 subunit B OS=Homo sapiens OX=9606 GN=EIF3B PE=1 SV=3           |
| sp P08865 RSSA_HUMAN  | HUMAN | 40S ribosomal protein SA OS=Homo sapiens OX=9606 GN=RPSA PE=1 SV=4                                        |
| sp Q9UBT2 SAE2_HUMAN  | HUMAN | SUMO-activating enzyme subunit 2 OS=Homo sapiens OX=9606 GN=UBA2 PE=1 SV=2                                |
| sp P62826 RAN_HUMAN   | HUMAN | GTP-binding nuclear protein Ran OS=Homo sapiens OX=9606 GN=RAN PE=1 SV=3                                  |
| sp Q9Y230 RUVB2_HUMAN | HUMAN | RuvB-like 2 OS=Homo sapiens OX=9606 GN=RUVBL2 PE=1 SV=3                                                   |
| sp P62195 PRS8_HUMAN  | HUMAN | 26S proteasome regulatory subunit 8 OS=Homo sapiens OX=9606 GN=PSMC5 PE=1 SV=1                            |
| sp P55060 XPO2_HUMAN  | HUMAN | Exportin-2 OS=Homo sapiens OX=9606 GN=CSE1L PE=1 SV=3                                                     |
| sp Q15029 U5S1_HUMAN  | HUMAN | 116 kDa U5 small nuclear ribonucleoprotein component OS=Homo sapiens OX=9606 GN=EFTUD2 PE=1 SV=1          |
| sp Q15181 IPYR_HUMAN  | HUMAN | Inorganic pyrophosphatase OS=Homo sapiens OX=9606 GN=PPA1 PE=1 SV=2                                       |
| sp P38606 VATA_HUMAN  | HUMAN | V-type proton ATPase catalytic subunit A OS=Homo sapiens OX=9606 GN=ATP6V1A PE=1 SV=2                     |
| sp P61160 ARP2_HUMAN  | HUMAN | Actin-related protein 2 OS=Homo sapiens OX=9606 GN=ACTR2 PE=1 SV=1                                        |
| sp P16930 FAAA_HUMAN  | HUMAN | Fumarylacetoacetase OS=Homo sapiens OX=9606 GN=FAH PE=1 SV=2                                              |
| sp P30041 PRDX6_HUMAN | HUMAN | Peroxiredoxin-6 OS=Homo sapiens OX=9606 GN=PRDX6 PE=1 SV=3                                                |
| sp Q08J23 NSUN2_HUMAN | HUMAN | RNA cytosine C(5)-methyltransferase NSUN2 OS=Homo sapiens OX=9606 GN=NSUN2 PE=1 SV=2                      |
| sp O60664 PLIN3_HUMAN | HUMAN | Perilipin-3 OS=Homo sapiens OX=9606 GN=PLIN3 PE=1 SV=3                                                    |
| sp Q9NQW7 XPP1_HUMAN  | HUMAN | Xaa-Pro aminopeptidase 1 OS=Homo sapiens OX=9606 GN=XPNPEP1 PE=1 SV=3                                     |

|                       |       |                                                                                                          |
|-----------------------|-------|----------------------------------------------------------------------------------------------------------|
| sp P25786 PSA1_HUMAN  | HUMAN | Proteasome subunit alpha type-1 OS=Homo sapiens OX=9606 GN=PSMA1 PE=1 SV=1                               |
| sp Q9NTJ3 SMC4_HUMAN  | HUMAN | Structural maintenance of chromosomes protein 4 OS=Homo sapiens OX=9606 GN=SMC4 PE=1 SV=2                |
| sp P42224 STAT1_HUMAN | HUMAN | Signal transducer and activator of transcription 1-alpha/beta OS=Homo sapiens OX=9606 GN=STAT1 PE=1 SV=2 |
| sp Q92945 FUBP2_HUMAN | HUMAN | Far upstream element-binding protein 2 OS=Homo sapiens OX=9606 GN=KHSRP PE=1 SV=4                        |
| sp P12081 HARS1_HUMAN | HUMAN | Histidine--tRNA ligase, cytoplasmic OS=Homo sapiens OX=9606 GN=HARS1 PE=1 SV=2                           |
| sp P06576 ATPB_HUMAN  | HUMAN | ATP synthase subunit beta, mitochondrial OS=Homo sapiens OX=9606 GN=ATP5F1B PE=1 SV=3                    |
| sp Q9P258 RCC2_HUMAN  | HUMAN | Protein RCC2 OS=Homo sapiens OX=9606 GN=RCC2 PE=1 SV=2                                                   |
| sp Q9HB71 CYBP_HUMAN  | HUMAN | Calcyclin-binding protein OS=Homo sapiens OX=9606 GN=CACYBP PE=1 SV=2                                    |
| sp P26641 EF1G_HUMAN  | HUMAN | Elongation factor 1-gamma OS=Homo sapiens OX=9606 GN=EEF1G PE=1 SV=3                                     |
| sp P29692 EF1D_HUMAN  | HUMAN | Elongation factor 1-delta OS=Homo sapiens OX=9606 GN=EEF1D PE=1 SV=5                                     |
| sp P49591 SYSC_HUMAN  | HUMAN | Serine--tRNA ligase, cytoplasmic OS=Homo sapiens OX=9606 GN=SARS1 PE=1 SV=3                              |
| sp P56192 SYMC_HUMAN  | HUMAN | Methionine--tRNA ligase, cytoplasmic OS=Homo sapiens OX=9606 GN=MARS1 PE=1 SV=2                          |
| sp O95347 SMC2_HUMAN  | HUMAN | Structural maintenance of chromosomes protein 2 OS=Homo sapiens OX=9606 GN=SMC2 PE=1 SV=2                |
| sp O60841 IF2P_HUMAN  | HUMAN | Eukaryotic translation initiation factor 5B OS=Homo sapiens OX=9606 GN=EIF5B PE=1 SV=4                   |
| sp P05388 RLA0_HUMAN  | HUMAN | 60S acidic ribosomal protein P0 OS=Homo sapiens OX=9606 GN=RPLP0 PE=1 SV=1                               |
| sp P61978 HNRPK_HUMAN | HUMAN | Heterogeneous nuclear ribonucleoprotein K OS=Homo sapiens OX=9606 GN=HNRNPK PE=1 SV=1                    |
| sp P60900 PSA6_HUMAN  | HUMAN | Proteasome subunit alpha type-6 OS=Homo sapiens OX=9606 GN=PSMA6 PE=1 SV=1                               |
| sp Q99613 EIF3C_HUMAN | HUMAN | Eukaryotic translation initiation factor 3 subunit C OS=Homo sapiens OX=9606 GN=EIF3C PE=1 SV=1          |
| sp P27797 CALR_HUMAN  | HUMAN | Calreticulin OS=Homo sapiens OX=9606 GN=CALR PE=1 SV=1                                                   |
| sp P54920 SNAA_HUMAN  | HUMAN | Alpha-soluble NSF attachment protein OS=Homo sapiens OX=9606 GN=NAPA PE=1 SV=3                           |
| sp O00429 DNM1L_HUMAN | HUMAN | Dynamin-1-like protein OS=Homo sapiens OX=9606 GN=DNM1L PE=1 SV=2                                        |
| sp P23141 EST1_HUMAN  | HUMAN | Liver carboxylesterase 1 OS=Homo sapiens OX=9606 GN=CES1 PE=1 SV=2                                       |
| sp P30740 ILEU_HUMAN  | HUMAN | Leukocyte elastase inhibitor OS=Homo sapiens OX=9606 GN=SERPINB1 PE=1 SV=1                               |
| sp P35527 K1C9_HUMAN  | HUMAN | Keratin, type I cytoskeletal 9 OS=Homo sapiens OX=9606 GN=KRT9 PE=1 SV=3                                 |
| sp Q9Y265 RUVB1_HUMAN | HUMAN | RuvB-like 1 OS=Homo sapiens OX=9606 GN=RUVBL1 PE=1 SV=1                                                  |
| sp Q9NTK5 OLA1_HUMAN  | HUMAN | Obg-like ATPase 1 OS=Homo sapiens OX=9606 GN=OLA1 PE=1 SV=2                                              |
| sp Q01469 FABP5_HUMAN | HUMAN | Fatty acid-binding protein 5 OS=Homo sapiens OX=9606 GN=FABP5 PE=1 SV=3                                  |
| sp P11908 PRPS2_HUMAN | HUMAN | Ribose-phosphate pyrophosphokinase 2 OS=Homo sapiens OX=9606 GN=PRPS2 PE=1 SV=2                          |
| sp P37802 TAGL2_HUMAN | HUMAN | Transgelin-2 OS=Homo sapiens OX=9606 GN=TAGLN2 PE=1 SV=3                                                 |
| sp P49589 SYCC_HUMAN  | HUMAN | Cysteine--tRNA ligase, cytoplasmic OS=Homo sapiens OX=9606 GN=CARS1 PE=1 SV=3                            |

|                       |       |                                                                                                             |
|-----------------------|-------|-------------------------------------------------------------------------------------------------------------|
| contam_sp ALBU_BOVIN  |       | contam_sp ALBU_BOVIN                                                                                        |
| sp P15311 EZRI_HUMAN  | HUMAN | Ezrin OS=Homo sapiens OX=9606 GN=EZR PE=1 SV=4                                                              |
| sp Q00796 DHSO_HUMAN  | HUMAN | Sorbitol dehydrogenase OS=Homo sapiens OX=9606 GN=SORD PE=1 SV=4                                            |
| sp Q13303 KCAB2_HUMAN | HUMAN | Voltage-gated potassium channel subunit beta-2 OS=Homo sapiens OX=9606 GN=KCAB2 PE=1 SV=2                   |
| sp P45974 UBP5_HUMAN  | HUMAN | Ubiquitin carboxyl-terminal hydrolase 5 OS=Homo sapiens OX=9606 GN=USP5 PE=1 SV=2                           |
| sp Q9Y4L1 HYOU1_HUMAN | HUMAN | Hypoxia up-regulated protein 1 OS=Homo sapiens OX=9606 GN=HYOU1 PE=1 SV=1                                   |
| sp P61981 1433G_HUMAN | HUMAN | 14-3-3 protein gamma OS=Homo sapiens OX=9606 GN=YWHAG PE=1 SV=2                                             |
| sp P63241 IF5A1_HUMAN | HUMAN | Eukaryotic translation initiation factor 5A-1 OS=Homo sapiens OX=9606 GN=EIF5A PE=1 SV=2                    |
| sp Q16881 TRXR1_HUMAN | HUMAN | Thioredoxin reductase 1, cytoplasmic OS=Homo sapiens OX=9606 GN=TXNRD1 PE=1 SV=3                            |
| sp P49321 NASP_HUMAN  | HUMAN | Nuclear autoantigenic sperm protein OS=Homo sapiens OX=9606 GN=NASP PE=1 SV=2                               |
| sp O00232 PSD12_HUMAN | HUMAN | 26S proteasome non-ATPase regulatory subunit 12 OS=Homo sapiens OX=9606 GN=PSMD12 PE=1 SV=3                 |
| sp P13667 PDIA4_HUMAN | HUMAN | Protein disulfide-isomerase A4 OS=Homo sapiens OX=9606 GN=PDIA4 PE=1 SV=2                                   |
| sp P35998 PRS7_HUMAN  | HUMAN | 26S proteasome regulatory subunit 7 OS=Homo sapiens OX=9606 GN=PSMC2 PE=1 SV=3                              |
| sp P62701 RS4X_HUMAN  | HUMAN | 40S ribosomal protein S4, X isoform OS=Homo sapiens OX=9606 GN=RPS4X PE=1 SV=2                              |
| sp Q9BXJ9 NAA15_HUMAN | HUMAN | N-alpha-acetyltransferase 15, NatA auxiliary subunit OS=Homo sapiens OX=9606 GN=NAA15 PE=1 SV=1             |
| sp P09211 GSTP1_HUMAN | HUMAN | Glutathione S-transferase P OS=Homo sapiens OX=9606 GN=GSTP1 PE=1 SV=2                                      |
| sp P49189 AL9A1_HUMAN | HUMAN | 4-trimethylaminobutyraldehyde dehydrogenase OS=Homo sapiens OX=9606 GN=ALDH9A1 PE=1 SV=3                    |
| sp Q9UNM6 PSD13_HUMAN | HUMAN | 26S proteasome non-ATPase regulatory subunit 13 OS=Homo sapiens OX=9606 GN=PSMD13 PE=1 SV=2                 |
| sp P30566 PUR8_HUMAN  | HUMAN | Adenylosuccinate lyase OS=Homo sapiens OX=9606 GN=ADSL PE=1 SV=2                                            |
| sp P47756 CAPZB_HUMAN | HUMAN | F-actin-capping protein subunit beta OS=Homo sapiens OX=9606 GN=CAPZB PE=1 SV=4                             |
| sp Q9NY33 DPP3_HUMAN  | HUMAN | Dipeptidyl peptidase 3 OS=Homo sapiens OX=9606 GN=DPP3 PE=1 SV=2                                            |
| sp O00571 DDX3X_HUMAN | HUMAN | ATP-dependent RNA helicase DDX3X OS=Homo sapiens OX=9606 GN=DDX3X PE=1 SV=3                                 |
| sp P62140 PP1B_HUMAN  | HUMAN | Serine/threonine-protein phosphatase PP1-beta catalytic subunit OS=Homo sapiens OX=9606 GN=PPP1CB PE=1 SV=3 |
| sp P00367 DHE3_HUMAN  | HUMAN | Glutamate dehydrogenase 1, mitochondrial OS=Homo sapiens OX=9606 GN=GLUD1 PE=1 SV=2                         |
| sp P11413 G6PD_HUMAN  | HUMAN | Glucose-6-phosphate 1-dehydrogenase OS=Homo sapiens OX=9606 GN=G6PD PE=1 SV=4                               |
| sp P06132 DCUP_HUMAN  | HUMAN | Uroporphyrinogen decarboxylase OS=Homo sapiens OX=9606 GN=UROD PE=1 SV=2                                    |
| sp Q9Y262 EIF3L_HUMAN | HUMAN | Eukaryotic translation initiation factor 3 subunit L OS=Homo sapiens OX=9606 GN=EIF3L PE=1 SV=1             |
| sp P41091 IF2G_HUMAN  | HUMAN | Eukaryotic translation initiation factor 2 subunit 3 OS=Homo sapiens OX=9606 GN=EIF2S3 PE=1 SV=3            |
| sp P52907 CAZA1_HUMAN | HUMAN | F-actin-capping protein subunit alpha-1 OS=Homo sapiens OX=9606 GN=CAPZA1 PE=1 SV=3                         |
| sp Q13045 FLII_HUMAN  | HUMAN | Protein flightless-1 homolog OS=Homo sapiens OX=9606 GN=FLII PE=1 SV=2                                      |

|                        |       |                                                                                                             |
|------------------------|-------|-------------------------------------------------------------------------------------------------------------|
| sp O14745 NHRF1_HUMAN  | HUMAN | Na(+)/H(+) exchange regulatory cofactor NHE-RF1 OS=Homo sapiens OX=9606 GN=SLC9A3R1 PE=1 SV=4               |
| sp O75643 U520_HUMAN   | HUMAN | U5 small nuclear ribonucleoprotein 200 kDa helicase OS=Homo sapiens OX=9606 GN=SNRNP200 PE=1 SV=2           |
| sp P22392 NDKB_HUMAN   | HUMAN | Nucleoside diphosphate kinase B OS=Homo sapiens OX=9606 GN=NME2 PE=1 SV=1                                   |
| sp P14550 AK1A1_HUMAN  | HUMAN | Aldo-keto reductase family 1 member A1 OS=Homo sapiens OX=9606 GN=AKR1A1 PE=1 SV=3                          |
| sp Q14166 TTL12_HUMAN  | HUMAN | Tubulin--tyrosine ligase-like protein 12 OS=Homo sapiens OX=9606 GN=TTLL12 PE=1 SV=2                        |
| sp P37837 TALDO_HUMAN  | HUMAN | Transaldolase OS=Homo sapiens OX=9606 GN=TALDO1 PE=1 SV=2                                                   |
| sp Q15021 CND1_HUMAN   | HUMAN | Condensin complex subunit 1 OS=Homo sapiens OX=9606 GN=NCAPD2 PE=1 SV=3                                     |
| sp P04792 HSPB1_HUMAN  | HUMAN | Heat shock protein beta-1 OS=Homo sapiens OX=9606 GN=HSPB1 PE=1 SV=2                                        |
| sp P43686 PRS6B_HUMAN  | HUMAN | 26S proteasome regulatory subunit 6B OS=Homo sapiens OX=9606 GN=PSMC4 PE=1 SV=2                             |
| sp P50995 ANX11_HUMAN  | HUMAN | Annexin A11 OS=Homo sapiens OX=9606 GN=ANXA11 PE=1 SV=1                                                     |
| sp P63244 RACK1_HUMAN  | HUMAN | Receptor of activated protein C kinase 1 OS=Homo sapiens OX=9606 GN=RACK1 PE=1 SV=3                         |
| sp Q92499 DDX1_HUMAN   | HUMAN | ATP-dependent RNA helicase DDX1 OS=Homo sapiens OX=9606 GN=DDX1 PE=1 SV=2                                   |
| sp Q9UNZ2 NSFL1C_HUMAN | HUMAN | NSFL1 cofactor p47 OS=Homo sapiens OX=9606 GN=NSFL1C PE=1 SV=2                                              |
| sp P21281 VATB2_HUMAN  | HUMAN | V-type proton ATPase subunit B, brain isoform OS=Homo sapiens OX=9606 GN=ATP6V1B2 PE=1 SV=3                 |
| sp O00231 PSD11_HUMAN  | HUMAN | 26S proteasome non-ATPase regulatory subunit 11 OS=Homo sapiens OX=9606 GN=PSMD11 PE=1 SV=3                 |
| sp P19367 HXK1_HUMAN   | HUMAN | Hexokinase-1 OS=Homo sapiens OX=9606 GN=HK1 PE=1 SV=3                                                       |
| sp O14818 PSA7_HUMAN   | HUMAN | Proteasome subunit alpha type-7 OS=Homo sapiens OX=9606 GN=PSMA7 PE=1 SV=1                                  |
| sp P23193 TCEA1_HUMAN  | HUMAN | Transcription elongation factor A protein 1 OS=Homo sapiens OX=9606 GN=TCEA1 PE=1 SV=2                      |
| sp O43242 PSMD3_HUMAN  | HUMAN | 26S proteasome non-ATPase regulatory subunit 3 OS=Homo sapiens OX=9606 GN=PSMD3 PE=1 SV=2                   |
| sp Q9BWD1 THIC_HUMAN   | HUMAN | Acetyl-CoA acetyltransferase, cytosolic OS=Homo sapiens OX=9606 GN=ACAT2 PE=1 SV=2                          |
| sp P08567 PLEK_HUMAN   | HUMAN | Pleckstrin OS=Homo sapiens OX=9606 GN=PLEK PE=1 SV=3                                                        |
| sp P17858 PFKAL_HUMAN  | HUMAN | ATP-dependent 6-phosphofructokinase, liver type OS=Homo sapiens OX=9606 GN=PFKL PE=1 SV=6                   |
| sp Q04446 GLGB_HUMAN   | HUMAN | 1,4-alpha-glucan-branching enzyme OS=Homo sapiens OX=9606 GN=GBE1 PE=1 SV=3                                 |
| sp Q06203 PUR1_HUMAN   | HUMAN | Amidophosphoribosyltransferase OS=Homo sapiens OX=9606 GN=PPAT PE=1 SV=1                                    |
| sp P49411 EFTU_HUMAN   | HUMAN | Elongation factor Tu, mitochondrial OS=Homo sapiens OX=9606 GN=TUFM PE=1 SV=2                               |
| sp Q9Y266 NUDC_HUMAN   | HUMAN | Nuclear migration protein nudC OS=Homo sapiens OX=9606 GN=NUDC PE=1 SV=1                                    |
| sp Q16576 RBBP7_HUMAN  | HUMAN | Histone-binding protein RBBP7 OS=Homo sapiens OX=9606 GN=RBBP7 PE=1 SV=1                                    |
| sp Q06210 GFPT1_HUMAN  | HUMAN | Glutamine--fructose-6-phosphate aminotransferase [isomerizing] 1 OS=Homo sapiens OX=9606 GN=GFPT1 PE=1 SV=3 |
| sp Q13200 PSMD2_HUMAN  | HUMAN | 26S proteasome non-ATPase regulatory subunit 2 OS=Homo sapiens OX=9606 GN=PSMD2 PE=1 SV=3                   |
| sp Q04760 LGUL_HUMAN   | HUMAN | Lactoylglutathione lyase OS=Homo sapiens OX=9606 GN=GLO1 PE=1 SV=4                                          |

|                       |       |                                                                                                                  |
|-----------------------|-------|------------------------------------------------------------------------------------------------------------------|
| sp P02545 LMNA_HUMAN  | HUMAN | Prelamin-A/C OS=Homo sapiens OX=9606 GN=LMNA PE=1 SV=1                                                           |
| sp Q9NSD9 SYFB_HUMAN  | HUMAN | Phenylalanine--tRNA ligase beta subunit OS=Homo sapiens OX=9606 GN=FARSB PE=1 SV=3                               |
| sp O15143 ARC1B_HUMAN | HUMAN | Actin-related protein 2/3 complex subunit 1B OS=Homo sapiens OX=9606 GN=ARPC1B PE=1 SV=3                         |
| sp Q12904 AIMP1_HUMAN | HUMAN | Aminoacyl tRNA synthase complex-interacting multifunctional protein 1 OS=Homo sapiens OX=9606 GN=AIMP1 PE=1 SV=2 |
| sp P13798 ACPH_HUMAN  | HUMAN | Acylamino-acid-releasing enzyme OS=Homo sapiens OX=9606 GN=APEH PE=1 SV=4                                        |
| sp Q14683 SMC1A_HUMAN | HUMAN | Structural maintenance of chromosomes protein 1A OS=Homo sapiens OX=9606 GN=SMC1A PE=1 SV=2                      |
| sp P30086 PEBP1_HUMAN | HUMAN | Phosphatidylethanolamine-binding protein 1 OS=Homo sapiens OX=9606 GN=PEBP1 PE=1 SV=3                            |
| sp P62081 RS7_HUMAN   | HUMAN | 40S ribosomal protein S7 OS=Homo sapiens OX=9606 GN=RPS7 PE=1 SV=1                                               |
| sp P42704 LPPRC_HUMAN | HUMAN | Leucine-rich PPR motif-containing protein, mitochondrial OS=Homo sapiens OX=9606 GN=LRPPRC PE=1 SV=3             |
| sp P20618 PSB1_HUMAN  | HUMAN | Proteasome subunit beta type-1 OS=Homo sapiens OX=9606 GN=PSMB1 PE=1 SV=2                                        |
| sp Q9Y295 DRG1_HUMAN  | HUMAN | Developmentally-regulated GTP-binding protein 1 OS=Homo sapiens OX=9606 GN=DRG1 PE=1 SV=1                        |
| sp P51991 ROA3_HUMAN  | HUMAN | Heterogeneous nuclear ribonucleoprotein A3 OS=Homo sapiens OX=9606 GN=HNRNPA3 PE=1 SV=2                          |
| sp P33316 DUT_HUMAN   | HUMAN | Deoxyuridine 5'-triphosphate nucleotidohydrolase, mitochondrial OS=Homo sapiens OX=9606 GN=DUT PE=1 SV=4         |
| sp P39023 RL3_HUMAN   | HUMAN | 60S ribosomal protein L3 OS=Homo sapiens OX=9606 GN=RPL3 PE=1 SV=2                                               |
| sp P62249 RS16_HUMAN  | HUMAN | 40S ribosomal protein S16 OS=Homo sapiens OX=9606 GN=RPS16 PE=1 SV=2                                             |
| sp P14317 HCLS1_HUMAN | HUMAN | Hematopoietic lineage cell-specific protein OS=Homo sapiens OX=9606 GN=HCLS1 PE=1 SV=3                           |
| sp Q13838 DX39B_HUMAN | HUMAN | Spliceosome RNA helicase DDX39B OS=Homo sapiens OX=9606 GN=DDX39B PE=1 SV=1                                      |
| sp P62333 PRS10_HUMAN | HUMAN | 26S proteasome regulatory subunit 10B OS=Homo sapiens OX=9606 GN=PSMC6 PE=1 SV=1                                 |
| sp P55209 NP1L1_HUMAN | HUMAN | Nucleosome assembly protein 1-like 1 OS=Homo sapiens OX=9606 GN=NAP1L1 PE=1 SV=1                                 |
| sp O75533 SF3B1_HUMAN | HUMAN | Splicing factor 3B subunit 1 OS=Homo sapiens OX=9606 GN=SF3B1 PE=1 SV=3                                          |
| sp P17980 PRS6A_HUMAN | HUMAN | 26S proteasome regulatory subunit 6A OS=Homo sapiens OX=9606 GN=PSMC3 PE=1 SV=3                                  |
| sp P15880 RS2_HUMAN   | HUMAN | 40S ribosomal protein S2 OS=Homo sapiens OX=9606 GN=RPS2 PE=1 SV=2                                               |
| sp P00390 GSHR_HUMAN  | HUMAN | Glutathione reductase, mitochondrial OS=Homo sapiens OX=9606 GN=GSR PE=1 SV=2                                    |
| sp Q12906 ILF3_HUMAN  | HUMAN | Interleukin enhancer-binding factor 3 OS=Homo sapiens OX=9606 GN=ILF3 PE=1 SV=3                                  |
| sp P12955 PEPD_HUMAN  | HUMAN | Xaa-Pro dipeptidase OS=Homo sapiens OX=9606 GN=PEPD PE=1 SV=3                                                    |
| sp P43487 RANG_HUMAN  | HUMAN | Ran-specific GTPase-activating protein OS=Homo sapiens OX=9606 GN=RANBP1 PE=1 SV=1                               |
| sp P27816 MAP4_HUMAN  | HUMAN | Microtubule-associated protein 4 OS=Homo sapiens OX=9606 GN=MAP4 PE=1 SV=3                                       |
| sp O15355 PPM1G_HUMAN | HUMAN | Protein phosphatase 1G OS=Homo sapiens OX=9606 GN=PPM1G PE=1 SV=1                                                |
| sp Q96AE4 FUBP1_HUMAN | HUMAN | Far upstream element-binding protein 1 OS=Homo sapiens OX=9606 GN=FUBP1 PE=1 SV=3                                |

|                       |       |                                                                                                    |
|-----------------------|-------|----------------------------------------------------------------------------------------------------|
| sp Q01105 SET_HUMAN   | HUMAN | Protein SET OS=Homo sapiens OX=9606 GN=SET PE=1 SV=3                                               |
| sp Q16539 MK14_HUMAN  | HUMAN | Mitogen-activated protein kinase 14 OS=Homo sapiens OX=9606 GN=MAPK14 PE=1 SV=3                    |
| sp Q8IZ83 A16A1_HUMAN | HUMAN | Aldehyde dehydrogenase family 16 member A1 OS=Homo sapiens OX=9606 GN=ALDH16A1 PE=1 SV=2           |
| sp Q00839 HNRPU_HUMAN | HUMAN | Heterogeneous nuclear ribonucleoprotein U OS=Homo sapiens OX=9606 GN=HNRNPU PE=1 SV=6              |
| sp P33176 KINH_HUMAN  | HUMAN | Kinesin-1 heavy chain OS=Homo sapiens OX=9606 GN=KIF5B PE=1 SV=1                                   |
| sp P17174 AATC_HUMAN  | HUMAN | Aspartate aminotransferase, cytoplasmic OS=Homo sapiens OX=9606 GN=GOT1 PE=1 SV=3                  |
| sp P43490 NAMPT_HUMAN | HUMAN | Nicotinamide phosphoribosyltransferase OS=Homo sapiens OX=9606 GN=NAMPT PE=1 SV=1                  |
| sp P61586 RHOA_HUMAN  | HUMAN | Transforming protein RhoA OS=Homo sapiens OX=9606 GN=RHOA PE=1 SV=1                                |
| sp Q06323 PSME1_HUMAN | HUMAN | Proteasome activator complex subunit 1 OS=Homo sapiens OX=9606 GN=PSME1 PE=1 SV=1                  |
| sp Q6IBS0 TWF2_HUMAN  | HUMAN | Twinfilin-2 OS=Homo sapiens OX=9606 GN=TWF2 PE=1 SV=2                                              |
| sp Q02878 RL6_HUMAN   | HUMAN | 60S ribosomal protein L6 OS=Homo sapiens OX=9606 GN=RPL6 PE=1 SV=3                                 |
| sp P61247 RS3A_HUMAN  | HUMAN | 40S ribosomal protein S3a OS=Homo sapiens OX=9606 GN=RPS3A PE=1 SV=2                               |
| sp P50502 F10A1_HUMAN | HUMAN | Hsc70-interacting protein OS=Homo sapiens OX=9606 GN=ST13 PE=1 SV=2                                |
| sp Q13126 MTAP_HUMAN  | HUMAN | S-methyl-5'-thioadenosine phosphorylase OS=Homo sapiens OX=9606 GN=MTAP PE=1 SV=2                  |
| sp Q13561 DCTN2_HUMAN | HUMAN | Dynactin subunit 2 OS=Homo sapiens OX=9606 GN=DCTN2 PE=1 SV=4                                      |
| sp Q96G03 PGM2_HUMAN  | HUMAN | Phosphoglucomutase-2 OS=Homo sapiens OX=9606 GN=PGM2 PE=1 SV=4                                     |
| sp P05198 IF2A_HUMAN  | HUMAN | Eukaryotic translation initiation factor 2 subunit 1 OS=Homo sapiens OX=9606 GN=EIF2S1 PE=1 SV=3   |
| sp P34897 GLYM_HUMAN  | HUMAN | Serine hydroxymethyltransferase, mitochondrial OS=Homo sapiens OX=9606 GN=SHMT2 PE=1 SV=3          |
| sp Q5VYK3 ECM29_HUMAN | HUMAN | Proteasome adapter and scaffold protein ECM29 OS=Homo sapiens OX=9606 GN=ECPAS PE=1 SV=2           |
| sp P52788 SPSY_HUMAN  | HUMAN | Spermine synthase OS=Homo sapiens OX=9606 GN=SMS PE=1 SV=2                                         |
| sp Q96QK1 VPS35_HUMAN | HUMAN | Vacuolar protein sorting-associated protein 35 OS=Homo sapiens OX=9606 GN=VPS35 PE=1 SV=2          |
| sp P07741 APT_HUMAN   | HUMAN | Adenine phosphoribosyltransferase OS=Homo sapiens OX=9606 GN=APRT PE=1 SV=2                        |
| sp P25398 RS12_HUMAN  | HUMAN | 40S ribosomal protein S12 OS=Homo sapiens OX=9606 GN=RPS12 PE=1 SV=3                               |
| sp Q15020 SART3_HUMAN | HUMAN | Squamous cell carcinoma antigen recognized by T-cells 3 OS=Homo sapiens OX=9606 GN=SART3 PE=1 SV=1 |
| sp P25098 ARBK1_HUMAN | HUMAN | Beta-adrenergic receptor kinase 1 OS=Homo sapiens OX=9606 GN=GRK2 PE=1 SV=2                        |
| sp Q15084 PDIA6_HUMAN | HUMAN | Protein disulfide-isomerase A6 OS=Homo sapiens OX=9606 GN=PDIA6 PE=1 SV=1                          |
| sp O75822 EIF3J_HUMAN | HUMAN | Eukaryotic translation initiation factor 3 subunit J OS=Homo sapiens OX=9606 GN=EIF3J PE=1 SV=2    |
| sp P23284 PIIB_HUMAN  | HUMAN | Peptidyl-prolyl cis-trans isomerase B OS=Homo sapiens OX=9606 GN=PPIB PE=1 SV=2                    |
| sp O15144 ARPC2_HUMAN | HUMAN | Actin-related protein 2/3 complex subunit 2 OS=Homo sapiens OX=9606 GN=ARPC2 PE=1 SV=1             |
| sp O15371 EIF3D_HUMAN | HUMAN | Eukaryotic translation initiation factor 3 subunit D OS=Homo sapiens OX=9606 GN=EIF3D PE=1 SV=1    |
| sp O00154 BACH_HUMAN  | HUMAN | Cytosolic acyl coenzyme A thioester hydrolase OS=Homo sapiens OX=9606 GN=ACOT7 PE=1 SV=3           |

|                       |       |                                                                                                        |
|-----------------------|-------|--------------------------------------------------------------------------------------------------------|
| sp P16152 CBR1_HUMAN  | HUMAN | Carbonyl reductase [NADPH] 1 OS=Homo sapiens OX=9606 GN=CBR1 PE=1 SV=3                                 |
| sp Q14103 HNRPD_HUMAN | HUMAN | Heterogeneous nuclear ribonucleoprotein D0 OS=Homo sapiens OX=9606 GN=HNRNPD PE=1 SV=1                 |
| sp P25788 PSA3_HUMAN  | HUMAN | Proteasome subunit alpha type-3 OS=Homo sapiens OX=9606 GN=PSMA3 PE=1 SV=2                             |
| sp P62241 RS8_HUMAN   | HUMAN | 40S ribosomal protein S8 OS=Homo sapiens OX=9606 GN=RPS8 PE=1 SV=2                                     |
| sp P40121 CAPG_HUMAN  | HUMAN | Macrophage-capping protein OS=Homo sapiens OX=9606 GN=CAPG PE=1 SV=2                                   |
| sp P62805 H4_HUMAN    | HUMAN | Histone H4 OS=Homo sapiens OX=9606 GN=H4C1 PE=1 SV=2                                                   |
| sp P53041 PPP5_HUMAN  | HUMAN | Serine/threonine-protein phosphatase 5 OS=Homo sapiens OX=9606 GN=PPP5C PE=1 SV=1                      |
| sp P48444 COPD_HUMAN  | HUMAN | Coatomer subunit delta OS=Homo sapiens OX=9606 GN=ARCN1 PE=1 SV=1                                      |
| sp P30048 PRDX3_HUMAN | HUMAN | Thioredoxin-dependent peroxide reductase, mitochondrial OS=Homo sapiens OX=9606 GN=PRDX3 PE=1 SV=3     |
| sp P27695 APEX1_HUMAN | HUMAN | DNA-(apurinic or apyrimidinic site) lyase OS=Homo sapiens OX=9606 GN=APEX1 PE=1 SV=2                   |
| sp O75347 TBCA_HUMAN  | HUMAN | Tubulin-specific chaperone A OS=Homo sapiens OX=9606 GN=TBCA PE=1 SV=3                                 |
| sp O00303 EIF3F_HUMAN | HUMAN | Eukaryotic translation initiation factor 3 subunit F OS=Homo sapiens OX=9606 GN=EIF3F PE=1 SV=1        |
| sp P22626 ROA2_HUMAN  | HUMAN | Heterogeneous nuclear ribonucleoproteins A2/B1 OS=Homo sapiens OX=9606 GN=HNRNPA2B1 PE=1 SV=2          |
| sp P46781 RS9_HUMAN   | HUMAN | 40S ribosomal protein S9 OS=Homo sapiens OX=9606 GN=RPS9 PE=1 SV=3                                     |
| sp P19623 SPEE_HUMAN  | HUMAN | Spermidine synthase OS=Homo sapiens OX=9606 GN=SRM PE=1 SV=1                                           |
| sp P02792 FRIL_HUMAN  | HUMAN | Ferritin light chain OS=Homo sapiens OX=9606 GN=FTL PE=1 SV=2                                          |
| sp Q9Y696 CLIC4_HUMAN | HUMAN | Chloride intracellular channel protein 4 OS=Homo sapiens OX=9606 GN=CLIC4 PE=1 SV=4                    |
| sp Q99873 ANM1_HUMAN  | HUMAN | Protein arginine N-methyltransferase 1 OS=Homo sapiens OX=9606 GN=PRMT1 PE=1 SV=3                      |
| sp P00492 HPRT_HUMAN  | HUMAN | Hypoxanthine-guanine phosphoribosyltransferase OS=Homo sapiens OX=9606 GN=HPRT1 PE=1 SV=2              |
| sp Q13564 ULA1_HUMAN  | HUMAN | NEDD8-activating enzyme E1 regulatory subunit OS=Homo sapiens OX=9606 GN=NAE1 PE=1 SV=1                |
| sp P18124 RL7_HUMAN   | HUMAN | 60S ribosomal protein L7 OS=Homo sapiens OX=9606 GN=RPL7 PE=1 SV=1                                     |
| sp P04899 GNAI2_HUMAN | HUMAN | Guanine nucleotide-binding protein G(i) subunit alpha-2 OS=Homo sapiens OX=9606 GN=GNAI2 PE=1 SV=3     |
| sp Q9BUJ2 HNRL1_HUMAN | HUMAN | Heterogeneous nuclear ribonucleoprotein U-like protein 1 OS=Homo sapiens OX=9606 GN=HNRNPUL1 PE=1 SV=2 |
| sp P78417 GSTO1_HUMAN | HUMAN | Glutathione S-transferase omega-1 OS=Homo sapiens OX=9606 GN=GSTO1 PE=1 SV=2                           |
| sp P06748 NPM_HUMAN   | HUMAN | Nucleophosmin OS=Homo sapiens OX=9606 GN=NPM1 PE=1 SV=2                                                |
| sp P51570 GALK1_HUMAN | HUMAN | Galactokinase OS=Homo sapiens OX=9606 GN=GALK1 PE=1 SV=1                                               |
| sp Q99536 VAT1_HUMAN  | HUMAN | Synaptic vesicle membrane protein VAT-1 homolog OS=Homo sapiens OX=9606 GN=VAT1 PE=1 SV=2              |
| sp Q8N1G4 LRC47_HUMAN | HUMAN | Leucine-rich repeat-containing protein 47 OS=Homo sapiens OX=9606 GN=LRRC47 PE=1 SV=1                  |
| sp Q9NUQ9 FA49B_HUMAN | HUMAN | Protein FAM49B OS=Homo sapiens OX=9606 GN=FAM49B PE=1 SV=1                                             |
| sp Q9HC38 GLOD4_HUMAN | HUMAN | Glyoxalase domain-containing protein 4 OS=Homo sapiens OX=9606 GN=GLOD4 PE=1 SV=1                      |

|                       |       |                                                                                                                     |
|-----------------------|-------|---------------------------------------------------------------------------------------------------------------------|
| sp Q96C19 EFHD2_HUMAN | HUMAN | EF-hand domain-containing protein D2 OS=Homo sapiens OX=9606 GN=EFHD2 PE=1 SV=1                                     |
| sp P26599 PTBP1_HUMAN | HUMAN | Polypyrimidine tract-binding protein 1 OS=Homo sapiens OX=9606 GN=PTBP1 PE=1 SV=1                                   |
| sp P00505 AATM_HUMAN  | HUMAN | Aspartate aminotransferase, mitochondrial OS=Homo sapiens OX=9606 GN=GOT2 PE=1 SV=3                                 |
| sp Q00341 VIGLN_HUMAN | HUMAN | Vigilin OS=Homo sapiens OX=9606 GN=HDLBP PE=1 SV=2                                                                  |
| sp O75153 CLU_HUMAN   | HUMAN | Clustered mitochondria protein homolog OS=Homo sapiens OX=9606 GN=CLUH PE=1 SV=2                                    |
| sp P68400 CSK21_HUMAN | HUMAN | Casein kinase II subunit alpha OS=Homo sapiens OX=9606 GN=CSNK2A1 PE=1 SV=1                                         |
| sp P62906 RL10A_HUMAN | HUMAN | 60S ribosomal protein L10a OS=Homo sapiens OX=9606 GN=RPL10A PE=1 SV=2                                              |
| sp Q99798 ACON_HUMAN  | HUMAN | Aconitate hydratase, mitochondrial OS=Homo sapiens OX=9606 GN=ACO2 PE=1 SV=2                                        |
| sp Q14558 KPRA_HUMAN  | HUMAN | Phosphoribosyl pyrophosphate synthase-associated protein 1 OS=Homo sapiens OX=9606 GN=PRPSAP1 PE=1 SV=2             |
| sp Q9UBE0 SAE1_HUMAN  | HUMAN | SUMO-activating enzyme subunit 1 OS=Homo sapiens OX=9606 GN=SAE1 PE=1 SV=1                                          |
| sp P00441 SODC_HUMAN  | HUMAN | Superoxide dismutase [Cu-Zn] OS=Homo sapiens OX=9606 GN=SOD1 PE=1 SV=2                                              |
| sp P31943 HNRH1_HUMAN | HUMAN | Heterogeneous nuclear ribonucleoprotein H OS=Homo sapiens OX=9606 GN=HNRNPH1 PE=1 SV=4                              |
| sp Q15393 SF3B3_HUMAN | HUMAN | Splicing factor 3B subunit 3 OS=Homo sapiens OX=9606 GN=SF3B3 PE=1 SV=4                                             |
| sp Q9UJ70 NAGK_HUMAN  | HUMAN | N-acetyl-D-glucosamine kinase OS=Homo sapiens OX=9606 GN=NAGK PE=1 SV=4                                             |
| sp P52292 IMA1_HUMAN  | HUMAN | Importin subunit alpha-1 OS=Homo sapiens OX=9606 GN=KPNA2 PE=1 SV=1                                                 |
| sp P17812 PYRG1_HUMAN | HUMAN | CTP synthase 1 OS=Homo sapiens OX=9606 GN=CTPS1 PE=1 SV=2                                                           |
| sp P20042 IF2B_HUMAN  | HUMAN | Eukaryotic translation initiation factor 2 subunit 2 OS=Homo sapiens OX=9606 GN=EIF2S2 PE=1 SV=2                    |
| sp P48735 IDHP_HUMAN  | HUMAN | Isocitrate dehydrogenase [NADP], mitochondrial OS=Homo sapiens OX=9606 GN=IDH2 PE=1 SV=2                            |
| sp Q12905 ILF2_HUMAN  | HUMAN | Interleukin enhancer-binding factor 2 OS=Homo sapiens OX=9606 GN=ILF2 PE=1 SV=2                                     |
| sp Q9NZL9 MAT2B_HUMAN | HUMAN | Methionine adenosyltransferase 2 subunit beta OS=Homo sapiens OX=9606 GN=MAT2B PE=1 SV=1                            |
| sp P30520 PURA2_HUMAN | HUMAN | Adenylosuccinate synthetase isozyme 2 OS=Homo sapiens OX=9606 GN=ADSS2 PE=1 SV=3                                    |
| sp P54819 KAD2_HUMAN  | HUMAN | Adenylate kinase 2, mitochondrial OS=Homo sapiens OX=9606 GN=AK2 PE=1 SV=2                                          |
| sp P62424 RL7A_HUMAN  | HUMAN | 60S ribosomal protein L7a OS=Homo sapiens OX=9606 GN=RPL7A PE=1 SV=2                                                |
| sp P12004 PCNA_HUMAN  | HUMAN | Proliferating cell nuclear antigen OS=Homo sapiens OX=9606 GN=PCNA PE=1 SV=1                                        |
| sp P14324 FPPS_HUMAN  | HUMAN | Farnesyl pyrophosphate synthase OS=Homo sapiens OX=9606 GN=FDPS PE=1 SV=4                                           |
| sp P67775 PP2AA_HUMAN | HUMAN | Serine/threonine-protein phosphatase 2A catalytic subunit alpha isoform OS=Homo sapiens OX=9606 GN=PPP2CA PE=1 SV=1 |
| sp P24752 THIL_HUMAN  | HUMAN | Acetyl-CoA acetyltransferase, mitochondrial OS=Homo sapiens OX=9606 GN=ACAT1 PE=1 SV=1                              |
| sp Q13435 SF3B2_HUMAN | HUMAN | Splicing factor 3B subunit 2 OS=Homo sapiens OX=9606 GN=SF3B2 PE=1 SV=2                                             |
| sp Q15365 PCBP1_HUMAN | HUMAN | Poly(rC)-binding protein 1 OS=Homo sapiens OX=9606 GN=PCBP1 PE=1 SV=2                                               |
| sp P62244 RS15A_HUMAN | HUMAN | 40S ribosomal protein S15a OS=Homo sapiens OX=9606 GN=RPS15A PE=1 SV=2                                              |

|                       |       |                                                                                                |
|-----------------------|-------|------------------------------------------------------------------------------------------------|
| sp P05387 RLA2_HUMAN  | HUMAN | 60S acidic ribosomal protein P2 OS=Homo sapiens OX=9606 GN=RPLP2 PE=1 SV=1                     |
| sp Q9UIA9 XPO7_HUMAN  | HUMAN | Exportin-7 OS=Homo sapiens OX=9606 GN=XPO7 PE=1 SV=3                                           |
| sp P13693 TCTP_HUMAN  | HUMAN | Translationally-controlled tumor protein OS=Homo sapiens OX=9606 GN=TPT1 PE=1 SV=1             |
| sp P20839 IMDH1_HUMAN | HUMAN | Inosine-5'-monophosphate dehydrogenase 1 OS=Homo sapiens OX=9606 GN=IMPDH1 PE=1 SV=2           |
| sp O95336 6PGL_HUMAN  | HUMAN | 6-phosphogluconolactonase OS=Homo sapiens OX=9606 GN=PGLS PE=1 SV=2                            |
| sp P23246 SFPQ_HUMAN  | HUMAN | Splicing factor, proline- and glutamine-rich OS=Homo sapiens OX=9606 GN=SFPQ PE=1 SV=2         |
| sp P51858 HDGF_HUMAN  | HUMAN | Hepatoma-derived growth factor OS=Homo sapiens OX=9606 GN=HDGF PE=1 SV=1                       |
| sp P07339 CATD_HUMAN  | HUMAN | Cathepsin D OS=Homo sapiens OX=9606 GN=CTSD PE=1 SV=1                                          |
| contam_sp TRYP_PIG    |       | contam_sp TRYP_PIG                                                                             |
| sp P46976 GLYG_HUMAN  | HUMAN | Glycogenin-1 OS=Homo sapiens OX=9606 GN=GYG1 PE=1 SV=4                                         |
| sp P32969 RL9_HUMAN   | HUMAN | 60S ribosomal protein L9 OS=Homo sapiens OX=9606 GN=RPL9 PE=1 SV=1                             |
| sp Q53EL6 PDCD4_HUMAN | HUMAN | Programmed cell death protein 4 OS=Homo sapiens OX=9606 GN=PDCD4 PE=1 SV=2                     |
| sp P55036 PSMD4_HUMAN | HUMAN | 26S proteasome non-ATPase regulatory subunit 4 OS=Homo sapiens OX=9606 GN=PSMD4 PE=1 SV=1      |
| sp P24534 EF1B_HUMAN  | HUMAN | Elongation factor 1-beta OS=Homo sapiens OX=9606 GN=EEF1B2 PE=1 SV=3                           |
| sp Q9BT78 CSN4_HUMAN  | HUMAN | COP9 signalosome complex subunit 4 OS=Homo sapiens OX=9606 GN=COPS4 PE=1 SV=1                  |
| sp P53004 BIEA_HUMAN  | HUMAN | Biliverdin reductase A OS=Homo sapiens OX=9606 GN=BLVRA PE=1 SV=2                              |
| sp Q16851 UGPA_HUMAN  | HUMAN | UTP--glucose-1-phosphate uridylyltransferase OS=Homo sapiens OX=9606 GN=UGP2 PE=1 SV=5         |
| sp P30044 PRDX5_HUMAN | HUMAN | Peroxioredoxin-5, mitochondrial OS=Homo sapiens OX=9606 GN=PRDX5 PE=1 SV=4                     |
| sp P61221 ABCE1_HUMAN | HUMAN | ATP-binding cassette sub-family E member 1 OS=Homo sapiens OX=9606 GN=ABCE1 PE=1 SV=1          |
| sp P16278 BGAL_HUMAN  | HUMAN | Beta-galactosidase OS=Homo sapiens OX=9606 GN=GLB1 PE=1 SV=2                                   |
| sp Q15631 TSN_HUMAN   | HUMAN | Translin OS=Homo sapiens OX=9606 GN=TSN PE=1 SV=1                                              |
| sp Q9Y3F4 STRAP_HUMAN | HUMAN | Serine-threonine kinase receptor-associated protein OS=Homo sapiens OX=9606 GN=STRAP PE=1 SV=1 |
| sp Q53T59 H1BP3_HUMAN | HUMAN | HCLS1-binding protein 3 OS=Homo sapiens OX=9606 GN=HS1BP3 PE=1 SV=1                            |
| sp Q92608 DOCK2_HUMAN | HUMAN | Dedicator of cytokinesis protein 2 OS=Homo sapiens OX=9606 GN=DOCK2 PE=1 SV=2                  |
| sp O76003 GLRX3_HUMAN | HUMAN | Glutaredoxin-3 OS=Homo sapiens OX=9606 GN=GLRX3 PE=1 SV=2                                      |
| sp P13645 K1C10_HUMAN | HUMAN | Keratin, type I cytoskeletal 10 OS=Homo sapiens OX=9606 GN=KRT10 PE=1 SV=6                     |
| sp Q13177 PAK2_HUMAN  | HUMAN | Serine/threonine-protein kinase PAK 2 OS=Homo sapiens OX=9606 GN=PAK2 PE=1 SV=3                |
| sp Q99829 CPNE1_HUMAN | HUMAN | Copine-1 OS=Homo sapiens OX=9606 GN=CPNE1 PE=1 SV=1                                            |
| sp O43396 TXNL1_HUMAN | HUMAN | Thioredoxin-like protein 1 OS=Homo sapiens OX=9606 GN=TXNL1 PE=1 SV=3                          |
| sp P25787 PSA2_HUMAN  | HUMAN | Proteasome subunit alpha type-2 OS=Homo sapiens OX=9606 GN=PSMA2 PE=1 SV=2                     |
| sp Q10567 AP1B1_HUMAN | HUMAN | AP-1 complex subunit beta-1 OS=Homo sapiens OX=9606 GN=AP1B1 PE=1 SV=2                         |

|                       |       |                                                                                                                                |
|-----------------------|-------|--------------------------------------------------------------------------------------------------------------------------------|
| sp Q9Y5B9 SP16H_HUMAN | HUMAN | FACT complex subunit SPT16 OS=Homo sapiens OX=9606 GN=SUPT16H PE=1 SV=1                                                        |
| sp Q9UMS4 PRP19_HUMAN | HUMAN | Pre-mRNA-processing factor 19 OS=Homo sapiens OX=9606 GN=PRPF19 PE=1 SV=1                                                      |
| sp O75937 DNJC8_HUMAN | HUMAN | DnaJ homolog subfamily C member 8 OS=Homo sapiens OX=9606 GN=DNAJC8 PE=1 SV=2                                                  |
| sp Q93009 UBP7_HUMAN  | HUMAN | Ubiquitin carboxyl-terminal hydrolase 7 OS=Homo sapiens OX=9606 GN=USP7 PE=1 SV=2                                              |
| sp Q9UHD1 CHRD1_HUMAN | HUMAN | Cysteine and histidine-rich domain-containing protein 1 OS=Homo sapiens OX=9606 GN=CHORDC1 PE=1 SV=2                           |
| sp P57737 CORO7_HUMAN | HUMAN | Coronin-7 OS=Homo sapiens OX=9606 GN=CORO7 PE=1 SV=2                                                                           |
| sp P25789 PSA4_HUMAN  | HUMAN | Proteasome subunit alpha type-4 OS=Homo sapiens OX=9606 GN=PSMA4 PE=1 SV=1                                                     |
| sp P63151 2ABA_HUMAN  | HUMAN | Serine/threonine-protein phosphatase 2A 55 kDa regulatory subunit B alpha isoform OS=Homo sapiens OX=9606 GN=PPP2R2A PE=1 SV=1 |
| sp Q6P2Q9 PRP8_HUMAN  | HUMAN | Pre-mRNA-processing-splicing factor 8 OS=Homo sapiens OX=9606 GN=PRPF8 PE=1 SV=2                                               |
| sp P54727 RD23B_HUMAN | HUMAN | UV excision repair protein RAD23 homolog B OS=Homo sapiens OX=9606 GN=RAD23B PE=1 SV=1                                         |
| sp P16949 STMN1_HUMAN | HUMAN | Stathmin OS=Homo sapiens OX=9606 GN=STMN1 PE=1 SV=3                                                                            |
| sp P61088 UBE2N_HUMAN | HUMAN | Ubiquitin-conjugating enzyme E2 N OS=Homo sapiens OX=9606 GN=UBE2N PE=1 SV=1                                                   |
| sp P28062 PSB8_HUMAN  | HUMAN | Proteasome subunit beta type-8 OS=Homo sapiens OX=9606 GN=PSMB8 PE=1 SV=3                                                      |
| sp P39019 RS19_HUMAN  | HUMAN | 40S ribosomal protein S19 OS=Homo sapiens OX=9606 GN=RPS19 PE=1 SV=2                                                           |
| sp Q14203 DCTN1_HUMAN | HUMAN | Dynactin subunit 1 OS=Homo sapiens OX=9606 GN=DCTN1 PE=1 SV=3                                                                  |
| sp Q08945 SSRP1_HUMAN | HUMAN | FACT complex subunit SSRP1 OS=Homo sapiens OX=9606 GN=SSRP1 PE=1 SV=1                                                          |
| sp P54578 UBP14_HUMAN | HUMAN | Ubiquitin carboxyl-terminal hydrolase 14 OS=Homo sapiens OX=9606 GN=USP14 PE=1 SV=3                                            |
| sp Q9UNF0 PACN2_HUMAN | HUMAN | Protein kinase C and casein kinase substrate in neurons protein 2 OS=Homo sapiens OX=9606 GN=PACSIN2 PE=1 SV=2                 |
| sp P29218 IMPA1_HUMAN | HUMAN | Inositol monophosphatase 1 OS=Homo sapiens OX=9606 GN=IMPA1 PE=1 SV=1                                                          |
| sp Q13011 ECH1_HUMAN  | HUMAN | Delta(3,5)-Delta(2,4)-dienoyl-CoA isomerase, mitochondrial OS=Homo sapiens OX=9606 GN=ECH1 PE=1 SV=2                           |
| sp P80303 NUCB2_HUMAN | HUMAN | Nucleobindin-2 OS=Homo sapiens OX=9606 GN=NUCB2 PE=1 SV=3                                                                      |
| sp P61604 CH10_HUMAN  | HUMAN | 10 kDa heat shock protein, mitochondrial OS=Homo sapiens OX=9606 GN=HSPE1 PE=1 SV=2                                            |
| sp Q9UJU6 DBNL_HUMAN  | HUMAN | Drebrin-like protein OS=Homo sapiens OX=9606 GN=DBNL PE=1 SV=1                                                                 |
| sp Q9BUF5 TBB6_HUMAN  | HUMAN | Tubulin beta-6 chain OS=Homo sapiens OX=9606 GN=TUBB6 PE=1 SV=1                                                                |
| sp P11216 PYGB_HUMAN  | HUMAN | Glycogen phosphorylase, brain form OS=Homo sapiens OX=9606 GN=PYGB PE=1 SV=5                                                   |
| sp Q15008 PSMD6_HUMAN | HUMAN | 26S proteasome non-ATPase regulatory subunit 6 OS=Homo sapiens OX=9606 GN=PSMD6 PE=1 SV=1                                      |
| sp P30050 RL12_HUMAN  | HUMAN | 60S ribosomal protein L12 OS=Homo sapiens OX=9606 GN=RPL12 PE=1 SV=1                                                           |
| sp P13861 KAP2_HUMAN  | HUMAN | cAMP-dependent protein kinase type II-alpha regulatory subunit OS=Homo sapiens OX=9606 GN=PRKAR2A PE=1 SV=2                    |

|                       |       |                                                                                                           |
|-----------------------|-------|-----------------------------------------------------------------------------------------------------------|
| sp P35268 RL22_HUMAN  | HUMAN | 60S ribosomal protein L22 OS=Homo sapiens OX=9606 GN=RPL22 PE=1 SV=2                                      |
| sp P35237 SPB6_HUMAN  | HUMAN | Serpin B6 OS=Homo sapiens OX=9606 GN=SERPINB6 PE=1 SV=3                                                   |
| sp Q9BTT0 AN32E_HUMAN | HUMAN | Acidic leucine-rich nuclear phosphoprotein 32 family member E OS=Homo sapiens OX=9606 GN=ANP32E PE=1 SV=1 |
| sp Q15437 SC23B_HUMAN | HUMAN | Protein transport protein Sec23B OS=Homo sapiens OX=9606 GN=SEC23B PE=1 SV=2                              |
| sp P52565 GDIR1_HUMAN | HUMAN | Rho GDP-dissociation inhibitor 1 OS=Homo sapiens OX=9606 GN=ARHGDI1 PE=1 SV=3                             |
| sp P53999 TCP4_HUMAN  | HUMAN | Activated RNA polymerase II transcriptional coactivator p15 OS=Homo sapiens OX=9606 GN=SUB1 PE=1 SV=3     |
| sp P46783 RS10_HUMAN  | HUMAN | 40S ribosomal protein S10 OS=Homo sapiens OX=9606 GN=RPS10 PE=1 SV=1                                      |
| sp O75663 TIPRL_HUMAN | HUMAN | TIP41-like protein OS=Homo sapiens OX=9606 GN=TIPRL PE=1 SV=2                                             |
| sp Q9UL46 PSME2_HUMAN | HUMAN | Proteasome activator complex subunit 2 OS=Homo sapiens OX=9606 GN=PSME2 PE=1 SV=4                         |
| sp Q9NTZ6 RBM12_HUMAN | HUMAN | RNA-binding protein 12 OS=Homo sapiens OX=9606 GN=RBM12 PE=1 SV=1                                         |
| sp Q8NC51 PAIRB_HUMAN | HUMAN | Plasminogen activator inhibitor 1 RNA-binding protein OS=Homo sapiens OX=9606 GN=SERBP1 PE=1 SV=2         |
| sp P00813 ADA_HUMAN   | HUMAN | Adenosine deaminase OS=Homo sapiens OX=9606 GN=ADA PE=1 SV=3                                              |
| sp O95757 HS74L_HUMAN | HUMAN | Heat shock 70 kDa protein 4L OS=Homo sapiens OX=9606 GN=HSPA4L PE=1 SV=3                                  |
| sp P48637 GSHB_HUMAN  | HUMAN | Glutathione synthetase OS=Homo sapiens OX=9606 GN=GSS PE=1 SV=1                                           |
| sp P14735 IDE_HUMAN   | HUMAN | Insulin-degrading enzyme OS=Homo sapiens OX=9606 GN=IDE PE=1 SV=4                                         |
| sp O75131 CPNE3_HUMAN | HUMAN | Copine-3 OS=Homo sapiens OX=9606 GN=CPNE3 PE=1 SV=1                                                       |
| sp Q9H0D6 XRN2_HUMAN  | HUMAN | 5'-3' exoribonuclease 2 OS=Homo sapiens OX=9606 GN=XRN2 PE=1 SV=1                                         |
| sp P10768 ESTD_HUMAN  | HUMAN | S-formylglutathione hydrolase OS=Homo sapiens OX=9606 GN=ESD PE=1 SV=2                                    |
| sp P49247 RPIA_HUMAN  | HUMAN | Ribose-5-phosphate isomerase OS=Homo sapiens OX=9606 GN=RPIA PE=1 SV=3                                    |
| sp Q96T76 MMS19_HUMAN | HUMAN | MMS19 nucleotide excision repair protein homolog OS=Homo sapiens OX=9606 GN=MMS19 PE=1 SV=2               |
| sp P60228 EIF3E_HUMAN | HUMAN | Eukaryotic translation initiation factor 3 subunit E OS=Homo sapiens OX=9606 GN=EIF3E PE=1 SV=1           |
| sp O14929 HAT1_HUMAN  | HUMAN | Histone acetyltransferase type B catalytic subunit OS=Homo sapiens OX=9606 GN=HAT1 PE=1 SV=1              |
| sp O75688 PPM1B_HUMAN | HUMAN | Protein phosphatase 1B OS=Homo sapiens OX=9606 GN=PPM1B PE=1 SV=1                                         |
| sp P51149 RAB7A_HUMAN | HUMAN | Ras-related protein Rab-7a OS=Homo sapiens OX=9606 GN=RAB7A PE=1 SV=1                                     |
| sp P59998 ARPC4_HUMAN | HUMAN | Actin-related protein 2/3 complex subunit 4 OS=Homo sapiens OX=9606 GN=ARPC4 PE=1 SV=3                    |
| sp Q9HB07 MYG1_HUMAN  | HUMAN | UPF0160 protein MYG1, mitochondrial OS=Homo sapiens OX=9606 GN=C12orf10 PE=1 SV=2                         |
| sp P10155 RO60_HUMAN  | HUMAN | 60 kDa SS-A/Ro ribonucleoprotein OS=Homo sapiens OX=9606 GN=RO60 PE=1 SV=2                                |
| sp P30043 BLVRB_HUMAN | HUMAN | Flavin reductase (NADPH) OS=Homo sapiens OX=9606 GN=BLVRB PE=1 SV=3                                       |
| sp Q15233 NONO_HUMAN  | HUMAN | Non-POU domain-containing octamer-binding protein OS=Homo sapiens OX=9606 GN=NONO PE=1 SV=4               |
| sp Q8N163 CCAR2_HUMAN | HUMAN | Cell cycle and apoptosis regulator protein 2 OS=Homo sapiens OX=9606 GN=CCAR2 PE=1 SV=2                   |

|                       |       |                                                                                                           |
|-----------------------|-------|-----------------------------------------------------------------------------------------------------------|
| sp P49721 PSB2_HUMAN  | HUMAN | Proteasome subunit beta type-2 OS=Homo sapiens OX=9606 GN=PSMB2 PE=1 SV=1                                 |
| sp Q9H773 DCTP1_HUMAN | HUMAN | dCTP pyrophosphatase 1 OS=Homo sapiens OX=9606 GN=DCTPP1 PE=1 SV=1                                        |
| sp O15511 ARPC5_HUMAN | HUMAN | Actin-related protein 2/3 complex subunit 5 OS=Homo sapiens OX=9606 GN=ARPC5 PE=1 SV=3                    |
| sp P62277 RS13_HUMAN  | HUMAN | 40S ribosomal protein S13 OS=Homo sapiens OX=9606 GN=RPS13 PE=1 SV=2                                      |
| sp Q7L576 CYFP1_HUMAN | HUMAN | Cytoplasmic FMR1-interacting protein 1 OS=Homo sapiens OX=9606 GN=CYFIP1 PE=1 SV=1                        |
| sp Q9Y4E8 UBP15_HUMAN | HUMAN | Ubiquitin carboxyl-terminal hydrolase 15 OS=Homo sapiens OX=9606 GN=USP15 PE=1 SV=3                       |
| sp P62993 GRB2_HUMAN  | HUMAN | Growth factor receptor-bound protein 2 OS=Homo sapiens OX=9606 GN=GRB2 PE=1 SV=1                          |
| sp P49720 PSB3_HUMAN  | HUMAN | Proteasome subunit beta type-3 OS=Homo sapiens OX=9606 GN=PSMB3 PE=1 SV=2                                 |
| sp Q16222 UAP1_HUMAN  | HUMAN | UDP-N-acetylhexosamine pyrophosphorylase OS=Homo sapiens OX=9606 GN=UAP1 PE=1 SV=3                        |
| sp P62191 PRS4_HUMAN  | HUMAN | 26S proteasome regulatory subunit 4 OS=Homo sapiens OX=9606 GN=PSMC1 PE=1 SV=1                            |
| sp Q9NQR4 NIT2_HUMAN  | HUMAN | Omega-amidase NIT2 OS=Homo sapiens OX=9606 GN=NIT2 PE=1 SV=1                                              |
| sp P16403 H12_HUMAN   | HUMAN | Histone H1.2 OS=Homo sapiens OX=9606 GN=H1-2 PE=1 SV=2                                                    |
| sp P62328 TYB4_HUMAN  | HUMAN | Thymosin beta-4 OS=Homo sapiens OX=9606 GN=TMSB4X PE=1 SV=2                                               |
| sp O75368 SH3L1_HUMAN | HUMAN | SH3 domain-binding glutamic acid-rich-like protein OS=Homo sapiens OX=9606 GN=SH3BGR1 PE=1 SV=1           |
| sp Q9Y5K5 UCHL5_HUMAN | HUMAN | Ubiquitin carboxyl-terminal hydrolase isozyme L5 OS=Homo sapiens OX=9606 GN=UCHL5 PE=1 SV=3               |
| sp P17844 DDX5_HUMAN  | HUMAN | Probable ATP-dependent RNA helicase DDX5 OS=Homo sapiens OX=9606 GN=DDX5 PE=1 SV=1                        |
| sp P28070 PSB4_HUMAN  | HUMAN | Proteasome subunit beta type-4 OS=Homo sapiens OX=9606 GN=PSMB4 PE=1 SV=4                                 |
| sp Q8TEX9 IPO4_HUMAN  | HUMAN | Importin-4 OS=Homo sapiens OX=9606 GN=IPO4 PE=1 SV=2                                                      |
| sp Q9Y224 RTRAF_HUMAN | HUMAN | RNA transcription, translation and transport factor protein OS=Homo sapiens OX=9606 GN=RTRAF PE=1 SV=1    |
| sp P63000 RAC1_HUMAN  | HUMAN | Ras-related C3 botulinum toxin substrate 1 OS=Homo sapiens OX=9606 GN=RAC1 PE=1 SV=1                      |
| sp Q15691 MARE1_HUMAN | HUMAN | Microtubule-associated protein RP/EB family member 1 OS=Homo sapiens OX=9606 GN=MAPRE1 PE=1 SV=3          |
| sp P43034 LIS1_HUMAN  | HUMAN | Platelet-activating factor acetylhydrolase IB subunit alpha OS=Homo sapiens OX=9606 GN=PAFAH1B1 PE=1 SV=2 |
| sp Q9ULV4 COR1C_HUMAN | HUMAN | Coronin-1C OS=Homo sapiens OX=9606 GN=CORO1C PE=1 SV=1                                                    |
| sp Q9UQE7 SMC3_HUMAN  | HUMAN | Structural maintenance of chromosomes protein 3 OS=Homo sapiens OX=9606 GN=SMC3 PE=1 SV=2                 |
| sp Q15942 ZYG1_HUMAN  | HUMAN | Zyxin OS=Homo sapiens OX=9606 GN=ZYG1 PE=1 SV=1                                                           |
| sp P34896 GLYC_HUMAN  | HUMAN | Serine hydroxymethyltransferase, cytosolic OS=Homo sapiens OX=9606 GN=SHMT1 PE=1 SV=1                     |
| sp P15104 GLNA_HUMAN  | HUMAN | Glutamine synthetase OS=Homo sapiens OX=9606 GN=GLUL PE=1 SV=4                                            |
| sp P62495 ERF1_HUMAN  | HUMAN | Eukaryotic peptide chain release factor subunit 1 OS=Homo sapiens OX=9606 GN=ETF1 PE=1 SV=3               |
| sp P55010 EIF5_HUMAN  | HUMAN | Eukaryotic translation initiation factor 5 OS=Homo sapiens OX=9606 GN=EIF5 PE=1 SV=2                      |

|                       |       |                                                                                                           |
|-----------------------|-------|-----------------------------------------------------------------------------------------------------------|
| sp O43847 NRDC_HUMAN  | HUMAN | Nardilysin OS=Homo sapiens OX=9606 GN=NRDC PE=1 SV=3                                                      |
| sp P50225 ST1A1_HUMAN | HUMAN | Sulfotransferase 1A1 OS=Homo sapiens OX=9606 GN=SULT1A1 PE=1 SV=3                                         |
| sp O96019 ACL6A_HUMAN | HUMAN | Actin-like protein 6A OS=Homo sapiens OX=9606 GN=ACTL6A PE=1 SV=1                                         |
| sp Q96SB4 SRPK1_HUMAN | HUMAN | SRSF protein kinase 1 OS=Homo sapiens OX=9606 GN=SRPK1 PE=1 SV=2                                          |
| sp P46060 RAGP1_HUMAN | HUMAN | Ran GTPase-activating protein 1 OS=Homo sapiens OX=9606 GN=RANGAP1 PE=1 SV=1                              |
| sp Q8NBS9 TXND5_HUMAN | HUMAN | Thioredoxin domain-containing protein 5 OS=Homo sapiens OX=9606 GN=TXNDC5 PE=1 SV=2                       |
| sp P31350 RIR2_HUMAN  | HUMAN | Ribonucleoside-diphosphate reductase subunit M2 OS=Homo sapiens OX=9606 GN=RRM2 PE=1 SV=1                 |
| sp P52701 MSH6_HUMAN  | HUMAN | DNA mismatch repair protein Msh6 OS=Homo sapiens OX=9606 GN=MSH6 PE=1 SV=2                                |
| sp Q99598 TSNAX_HUMAN | HUMAN | Translin-associated protein X OS=Homo sapiens OX=9606 GN=TSNAX PE=1 SV=1                                  |
| sp Q8TBC4 UBA3_HUMAN  | HUMAN | NEDD8-activating enzyme E1 catalytic subunit OS=Homo sapiens OX=9606 GN=UBA3 PE=1 SV=2                    |
| sp P38919 IF4A3_HUMAN | HUMAN | Eukaryotic initiation factor 4A-III OS=Homo sapiens OX=9606 GN=EIF4A3 PE=1 SV=4                           |
| sp Q9UKK9 NUDT5_HUMAN | HUMAN | ADP-sugar pyrophosphatase OS=Homo sapiens OX=9606 GN=NUDT5 PE=1 SV=1                                      |
| sp Q12874 SF3A3_HUMAN | HUMAN | Splicing factor 3A subunit 3 OS=Homo sapiens OX=9606 GN=SF3A3 PE=1 SV=1                                   |
| sp P67809 YBOX1_HUMAN | HUMAN | Y-box-binding protein 1 OS=Homo sapiens OX=9606 GN=YBX1 PE=1 SV=3                                         |
| sp P30533 AMRP_HUMAN  | HUMAN | Alpha-2-macroglobulin receptor-associated protein OS=Homo sapiens OX=9606 GN=LRPAP1 PE=1 SV=1             |
| sp Q92688 AN32B_HUMAN | HUMAN | Acidic leucine-rich nuclear phosphoprotein 32 family member B OS=Homo sapiens OX=9606 GN=ANP32B PE=1 SV=1 |
| sp Q15366 PCBP2_HUMAN | HUMAN | Poly(rC)-binding protein 2 OS=Homo sapiens OX=9606 GN=PCBP2 PE=1 SV=1                                     |
| sp P61086 UBE2K_HUMAN | HUMAN | Ubiquitin-conjugating enzyme E2 K OS=Homo sapiens OX=9606 GN=UBE2K PE=1 SV=3                              |
| sp P09661 RU2A_HUMAN  | HUMAN | U2 small nuclear ribonucleoprotein A' OS=Homo sapiens OX=9606 GN=SNRPA1 PE=1 SV=2                         |
| sp Q9NR50 EI2BG_HUMAN | HUMAN | Translation initiation factor eIF-2B subunit gamma OS=Homo sapiens OX=9606 GN=EIF2B3 PE=1 SV=1            |
| sp P62753 RS6_HUMAN   | HUMAN | 40S ribosomal protein S6 OS=Homo sapiens OX=9606 GN=RPS6 PE=1 SV=1                                        |
| sp O94903 PLPHP_HUMAN | HUMAN | Pyridoxal phosphate homeostasis protein OS=Homo sapiens OX=9606 GN=PLPBP PE=1 SV=1                        |
| sp Q9NQP4 PFD4_HUMAN  | HUMAN | Prefoldin subunit 4 OS=Homo sapiens OX=9606 GN=PFDN4 PE=1 SV=1                                            |
| sp P31946 1433B_HUMAN | HUMAN | 14-3-3 protein beta/alpha OS=Homo sapiens OX=9606 GN=YWHAB PE=1 SV=3                                      |
| sp P06454 PTMA_HUMAN  | HUMAN | Prothymosin alpha OS=Homo sapiens OX=9606 GN=PTMA PE=1 SV=2                                               |
| sp P52272 HNRPM_HUMAN | HUMAN | Heterogeneous nuclear ribonucleoprotein M OS=Homo sapiens OX=9606 GN=HNRNPM PE=1 SV=3                     |
| sp O60256 KPRB_HUMAN  | HUMAN | Phosphoribosyl pyrophosphate synthase-associated protein 2 OS=Homo sapiens OX=9606 GN=PRPSAP2 PE=1 SV=1   |
| sp Q9BTE6 AASD1_HUMAN | HUMAN | Alanyl-tRNA editing protein Aarsd1 OS=Homo sapiens OX=9606 GN=AARSD1 PE=1 SV=2                            |
| sp O14744 ANM5_HUMAN  | HUMAN | Protein arginine N-methyltransferase 5 OS=Homo sapiens OX=9606 GN=PRMT5 PE=1 SV=4                         |
| sp P08670 VIME_HUMAN  | HUMAN | Vimentin OS=Homo sapiens OX=9606 GN=VIM PE=1 SV=4                                                         |

|                        |       |                                                                                                              |
|------------------------|-------|--------------------------------------------------------------------------------------------------------------|
| sp P09382 LEG1_HUMAN   | HUMAN | Galectin-1 OS=Homo sapiens OX=9606 GN=LGALS1 PE=1 SV=2                                                       |
| sp P61289 PSME3_HUMAN  | HUMAN | Proteasome activator complex subunit 3 OS=Homo sapiens OX=9606 GN=PSME3 PE=1 SV=1                            |
| sp P46459 NSF_HUMAN    | HUMAN | Vesicle-fusing ATPase OS=Homo sapiens OX=9606 GN=NSF PE=1 SV=3                                               |
| sp P62888 RL30_HUMAN   | HUMAN | 60S ribosomal protein L30 OS=Homo sapiens OX=9606 GN=RPL30 PE=1 SV=2                                         |
| sp P61201 CSN2_HUMAN   | HUMAN | COP9 signalosome complex subunit 2 OS=Homo sapiens OX=9606 GN=COPS2 PE=1 SV=1                                |
| sp P30040 ERP29_HUMAN  | HUMAN | Endoplasmic reticulum resident protein 29 OS=Homo sapiens OX=9606 GN=ERP29 PE=1 SV=4                         |
| sp P35606 COPB2_HUMAN  | HUMAN | Coatomer subunit beta' OS=Homo sapiens OX=9606 GN=COPB2 PE=1 SV=2                                            |
| sp O95352 ATG7_HUMAN   | HUMAN | Ubiquitin-like modifier-activating enzyme ATG7 OS=Homo sapiens OX=9606 GN=ATG7 PE=1 SV=1                     |
| sp P13804 ETFA_HUMAN   | HUMAN | Electron transfer flavoprotein subunit alpha, mitochondrial OS=Homo sapiens OX=9606 GN=ETFA PE=1 SV=1        |
| sp P07910 HNRPC_HUMAN  | HUMAN | Heterogeneous nuclear ribonucleoproteins C1/C2 OS=Homo sapiens OX=9606 GN=HNRNPC PE=1 SV=4                   |
| sp Q8IYD1 ERF3B_HUMAN  | HUMAN | Eukaryotic peptide chain release factor GTP-binding subunit ERF3B OS=Homo sapiens OX=9606 GN=GSPT2 PE=1 SV=2 |
| sp P37108 SRP14_HUMAN  | HUMAN | Signal recognition particle 14 kDa protein OS=Homo sapiens OX=9606 GN=SRP14 PE=1 SV=2                        |
| sp P53618 COPB_HUMAN   | HUMAN | Coatomer subunit beta OS=Homo sapiens OX=9606 GN=COPB1 PE=1 SV=3                                             |
| sp O75312 ZPR1_HUMAN   | HUMAN | Zinc finger protein ZPR1 OS=Homo sapiens OX=9606 GN=ZPR1 PE=1 SV=1                                           |
| sp P14866 HNRPL_HUMAN  | HUMAN | Heterogeneous nuclear ribonucleoprotein L OS=Homo sapiens OX=9606 GN=HNRNPL PE=1 SV=2                        |
| sp Q9NT62 ATG3_HUMAN   | HUMAN | Ubiquitin-like-conjugating enzyme ATG3 OS=Homo sapiens OX=9606 GN=ATG3 PE=1 SV=1                             |
| sp P07954 FUMH_HUMAN   | HUMAN | Fumarate hydratase, mitochondrial OS=Homo sapiens OX=9606 GN=FB PE=1 SV=3                                    |
| sp Q8NE71 ABCF1_HUMAN  | HUMAN | ATP-binding cassette sub-family F member 1 OS=Homo sapiens OX=9606 GN=ABCF1 PE=1 SV=2                        |
| sp O95433 AHSA1_HUMAN  | HUMAN | Activator of 90 kDa heat shock protein ATPase homolog 1 OS=Homo sapiens OX=9606 GN=AHSA1 PE=1 SV=1           |
| sp Q9UBQ7 GRHPR_HUMAN  | HUMAN | Glyoxylate reductase/hydroxypyruvate reductase OS=Homo sapiens OX=9606 GN=GRHPR PE=1 SV=1                    |
| sp Q13347 EIF3I_HUMAN  | HUMAN | Eukaryotic translation initiation factor 3 subunit I OS=Homo sapiens OX=9606 GN=EIF3I PE=1 SV=1              |
| sp Q2NL82 TSR1_HUMAN   | HUMAN | Pre-rRNA-processing protein TSR1 homolog OS=Homo sapiens OX=9606 GN=TSR1 PE=1 SV=1                           |
| sp P41240 CSK_HUMAN    | HUMAN | Tyrosine-protein kinase CSK OS=Homo sapiens OX=9606 GN=CSK PE=1 SV=1                                         |
| sp Q9UI10 EIF2BD_HUMAN | HUMAN | Translation initiation factor eIF-2B subunit delta OS=Homo sapiens OX=9606 GN=EIF2B4 PE=1 SV=2               |
| sp Q7Z4W1 DCXR_HUMAN   | HUMAN | L-xylulose reductase OS=Homo sapiens OX=9606 GN=DCXR PE=1 SV=2                                               |
| sp P61353 RL27_HUMAN   | HUMAN | 60S ribosomal protein L27 OS=Homo sapiens OX=9606 GN=RPL27 PE=1 SV=2                                         |
| sp P47755 CAZA2_HUMAN  | HUMAN | F-actin-capping protein subunit alpha-2 OS=Homo sapiens OX=9606 GN=CAPZA2 PE=1 SV=3                          |
| sp P09972 ALDOC_HUMAN  | HUMAN | Fructose-bisphosphate aldolase C OS=Homo sapiens OX=9606 GN=ALDOC PE=1 SV=2                                  |
| sp O75390 CISY_HUMAN   | HUMAN | Citrate synthase, mitochondrial OS=Homo sapiens OX=9606 GN=CS PE=1 SV=2                                      |

|                       |       |                                                                                                |
|-----------------------|-------|------------------------------------------------------------------------------------------------|
| sp P20290 BTF3_HUMAN  | HUMAN | Transcription factor BTF3 OS=Homo sapiens OX=9606 GN=BTF3 PE=1 SV=1                            |
| sp Q9Y310 RTCB_HUMAN  | HUMAN | RNA-splicing ligase RtcB homolog OS=Homo sapiens OX=9606 GN=RTCB PE=1 SV=1                     |
| sp Q99714 HCD2_HUMAN  | HUMAN | 3-hydroxyacyl-CoA dehydrogenase type-2 OS=Homo sapiens OX=9606 GN=HSD17B10 PE=1 SV=3           |
| sp Q15717 ELAV1_HUMAN | HUMAN | ELAV-like protein 1 OS=Homo sapiens OX=9606 GN=ELAVL1 PE=1 SV=2                                |
| sp Q92900 RENT1_HUMAN | HUMAN | Regulator of nonsense transcripts 1 OS=Homo sapiens OX=9606 GN=UPF1 PE=1 SV=2                  |
| sp Q9Y383 LC7L2_HUMAN | HUMAN | Putative RNA-binding protein Luc7-like 2 OS=Homo sapiens OX=9606 GN=LUC7L2 PE=1 SV=2           |
| sp P00966 ASSY_HUMAN  | HUMAN | Argininosuccinate synthase OS=Homo sapiens OX=9606 GN=ASS1 PE=1 SV=2                           |
| sp Q99880 H2B1L_HUMAN | HUMAN | Histone H2B type 1-L OS=Homo sapiens OX=9606 GN=H2BC13 PE=1 SV=3                               |
| sp O43399 TPD54_HUMAN | HUMAN | Tumor protein D54 OS=Homo sapiens OX=9606 GN=TPD52L2 PE=1 SV=2                                 |
| sp Q9GZP4 PITH1_HUMAN | HUMAN | PITH domain-containing protein 1 OS=Homo sapiens OX=9606 GN=PITHD1 PE=1 SV=1                   |
| sp Q00688 FKBP3_HUMAN | HUMAN | Peptidyl-prolyl cis-trans isomerase FKBP3 OS=Homo sapiens OX=9606 GN=FKBP3 PE=1 SV=1           |
| sp P07686 HEXB_HUMAN  | HUMAN | Beta-hexosaminidase subunit beta OS=Homo sapiens OX=9606 GN=HEXB PE=1 SV=3                     |
| sp Q9P289 STK26_HUMAN | HUMAN | Serine/threonine-protein kinase 26 OS=Homo sapiens OX=9606 GN=STK26 PE=1 SV=2                  |
| sp P31153 METK2_HUMAN | HUMAN | S-adenosylmethionine synthase isoform type-2 OS=Homo sapiens OX=9606 GN=MAT2A PE=1 SV=1        |
| sp P30046 DOPD_HUMAN  | HUMAN | D-dopachrome decarboxylase OS=Homo sapiens OX=9606 GN=DDT PE=1 SV=3                            |
| sp Q9Y678 COPG1_HUMAN | HUMAN | Coatomer subunit gamma-1 OS=Homo sapiens OX=9606 GN=COPG1 PE=1 SV=1                            |
| sp P15531 NDKA_HUMAN  | HUMAN | Nucleoside diphosphate kinase A OS=Homo sapiens OX=9606 GN=NME1 PE=1 SV=1                      |
| sp P06400 RB_HUMAN    | HUMAN | Retinoblastoma-associated protein OS=Homo sapiens OX=9606 GN=RB1 PE=1 SV=2                     |
| sp Q14232 EI2BA_HUMAN | HUMAN | Translation initiation factor eIF-2B subunit alpha OS=Homo sapiens OX=9606 GN=EIF2B1 PE=1 SV=1 |
| sp P62857 RS28_HUMAN  | HUMAN | 40S ribosomal protein S28 OS=Homo sapiens OX=9606 GN=RPS28 PE=1 SV=1                           |
| sp Q14258 TRI25_HUMAN | HUMAN | E3 ubiquitin/ISG15 ligase TRIM25 OS=Homo sapiens OX=9606 GN=TRIM25 PE=1 SV=2                   |
| sp Q9ULC4 MCTS1_HUMAN | HUMAN | Malignant T-cell-amplified sequence 1 OS=Homo sapiens OX=9606 GN=MCTS1 PE=1 SV=1               |
| sp O00273 DFFA_HUMAN  | HUMAN | DNA fragmentation factor subunit alpha OS=Homo sapiens OX=9606 GN=DFFA PE=1 SV=1               |
| sp O75534 CSDE1_HUMAN | HUMAN | Cold shock domain-containing protein E1 OS=Homo sapiens OX=9606 GN=CSDE1 PE=1 SV=2             |
| sp Q9BTE3 MCMBP_HUMAN | HUMAN | Mini-chromosome maintenance complex-binding protein OS=Homo sapiens OX=9606 GN=MCMBP PE=1 SV=2 |
| sp Q92973 TNPO1_HUMAN | HUMAN | Transportin-1 OS=Homo sapiens OX=9606 GN=TNPO1 PE=1 SV=2                                       |
| sp Q13098 CSN1_HUMAN  | HUMAN | COP9 signalosome complex subunit 1 OS=Homo sapiens OX=9606 GN=GPS1 PE=1 SV=4                   |
| sp P26358 DNMT1_HUMAN | HUMAN | DNA (cytosine-5)-methyltransferase 1 OS=Homo sapiens OX=9606 GN=DNMT1 PE=1 SV=2                |
| sp O95782 AP2A1_HUMAN | HUMAN | AP-2 complex subunit alpha-1 OS=Homo sapiens OX=9606 GN=AP2A1 PE=1 SV=3                        |
| sp Q7L014 DDX46_HUMAN | HUMAN | Probable ATP-dependent RNA helicase DDX46 OS=Homo sapiens OX=9606 GN=DDX46 PE=1 SV=2           |

|                       |       |                                                                                                                  |
|-----------------------|-------|------------------------------------------------------------------------------------------------------------------|
| sp Q04917 1433F_HUMAN | HUMAN | 14-3-3 protein eta OS=Homo sapiens OX=9606 GN=YWHAH PE=1 SV=4                                                    |
| sp Q92556 ELMO1_HUMAN | HUMAN | Engulfment and cell motility protein 1 OS=Homo sapiens OX=9606 GN=ELMO1 PE=1 SV=2                                |
| sp P49903 SPS1_HUMAN  | HUMAN | Selenide, water dikinase 1 OS=Homo sapiens OX=9606 GN=SEPHS1 PE=1 SV=2                                           |
| sp Q15003 CND2_HUMAN  | HUMAN | Condensin complex subunit 2 OS=Homo sapiens OX=9606 GN=NCAPH PE=1 SV=3                                           |
| sp Q8TAQ2 SMRC2_HUMAN | HUMAN | SWI/SNF complex subunit SMARCC2 OS=Homo sapiens OX=9606 GN=SMARCC2 PE=1 SV=1                                     |
| sp P10599 THIO_HUMAN  | HUMAN | Thioredoxin OS=Homo sapiens OX=9606 GN=TXN PE=1 SV=3                                                             |
| sp Q9NR45 SIAS_HUMAN  | HUMAN | Sialic acid synthase OS=Homo sapiens OX=9606 GN=NANS PE=1 SV=2                                                   |
| sp Q15459 SF3A1_HUMAN | HUMAN | Splicing factor 3A subunit 1 OS=Homo sapiens OX=9606 GN=SF3A1 PE=1 SV=1                                          |
| sp O00487 PSDE_HUMAN  | HUMAN | 26S proteasome non-ATPase regulatory subunit 14 OS=Homo sapiens OX=9606 GN=PSMD14 PE=1 SV=1                      |
| sp Q02543 RL18A_HUMAN | HUMAN | 60S ribosomal protein L18a OS=Homo sapiens OX=9606 GN=RPL18A PE=1 SV=2                                           |
| sp Q7Z4H3 HDDC2_HUMAN | HUMAN | HD domain-containing protein 2 OS=Homo sapiens OX=9606 GN=HDDC2 PE=1 SV=1                                        |
| sp P04424 ARLY_HUMAN  | HUMAN | Argininosuccinate lyase OS=Homo sapiens OX=9606 GN=ASL PE=1 SV=4                                                 |
| sp P78347 GTF2I_HUMAN | HUMAN | General transcription factor II-I OS=Homo sapiens OX=9606 GN=GTF2I PE=1 SV=2                                     |
| sp Q32MZ4 LRRF1_HUMAN | HUMAN | Leucine-rich repeat flightless-interacting protein 1 OS=Homo sapiens OX=9606 GN=LRRFIP1 PE=1 SV=2                |
| sp O43592 XPOT_HUMAN  | HUMAN | Exportin-T OS=Homo sapiens OX=9606 GN=XPOT PE=1 SV=2                                                             |
| sp P63220 RS21_HUMAN  | HUMAN | 40S ribosomal protein S21 OS=Homo sapiens OX=9606 GN=RPS21 PE=1 SV=1                                             |
| sp Q01581 HMCS1_HUMAN | HUMAN | Hydroxymethylglutaryl-CoA synthase, cytoplasmic OS=Homo sapiens OX=9606 GN=HMGC1 PE=1 SV=2                       |
| sp P27707 DCK_HUMAN   | HUMAN | Deoxycytidine kinase OS=Homo sapiens OX=9606 GN=DCK PE=1 SV=1                                                    |
| sp P48506 GSH1_HUMAN  | HUMAN | Glutamate--cysteine ligase catalytic subunit OS=Homo sapiens OX=9606 GN=GCLC PE=1 SV=2                           |
| sp Q13630 FCL_HUMAN   | HUMAN | GDP-L-fucose synthase OS=Homo sapiens OX=9606 GN=TSTA3 PE=1 SV=1                                                 |
| sp P09488 GSTM1_HUMAN | HUMAN | Glutathione S-transferase Mu 1 OS=Homo sapiens OX=9606 GN=GSTM1 PE=1 SV=3                                        |
| sp P60953 CDC42_HUMAN | HUMAN | Cell division control protein 42 homolog OS=Homo sapiens OX=9606 GN=CDC42 PE=1 SV=2                              |
| sp P27694 RFA1_HUMAN  | HUMAN | Replication protein A 70 kDa DNA-binding subunit OS=Homo sapiens OX=9606 GN=RPA1 PE=1 SV=2                       |
| sp P17655 CAN2_HUMAN  | HUMAN | Calpain-2 catalytic subunit OS=Homo sapiens OX=9606 GN=CAPN2 PE=1 SV=6                                           |
| sp Q9NZL4 HPBP1_HUMAN | HUMAN | Hsp70-binding protein 1 OS=Homo sapiens OX=9606 GN=HSPBP1 PE=1 SV=2                                              |
| sp Q99439 CNN2_HUMAN  | HUMAN | Calponin-2 OS=Homo sapiens OX=9606 GN=CNN2 PE=1 SV=4                                                             |
| sp Q9Y6E2 BZW2_HUMAN  | HUMAN | Basic leucine zipper and W2 domain-containing protein 2 OS=Homo sapiens OX=9606 GN=BZW2 PE=1 SV=1                |
| sp Q16401 PSMD5_HUMAN | HUMAN | 26S proteasome non-ATPase regulatory subunit 5 OS=Homo sapiens OX=9606 GN=PSMD5 PE=1 SV=3                        |
| sp Q13155 AIMP2_HUMAN | HUMAN | Aminoacyl tRNA synthase complex-interacting multifunctional protein 2 OS=Homo sapiens OX=9606 GN=AIMP2 PE=1 SV=2 |
| sp P61758 PFD3_HUMAN  | HUMAN | Prefoldin subunit 3 OS=Homo sapiens OX=9606 GN=VBP1 PE=1 SV=4                                                    |

|                       |       |                                                                                                              |
|-----------------------|-------|--------------------------------------------------------------------------------------------------------------|
| sp Q9UMX0 UBQL1_HUMAN | HUMAN | Ubiquilin-1 OS=Homo sapiens OX=9606 GN=UBQLN1 PE=1 SV=2                                                      |
| sp Q9H2J4 PDCL3_HUMAN | HUMAN | Phosducin-like protein 3 OS=Homo sapiens OX=9606 GN=PDCL3 PE=1 SV=1                                          |
| sp P60660 MYL6_HUMAN  | HUMAN | Myosin light polypeptide 6 OS=Homo sapiens OX=9606 GN=MYL6 PE=1 SV=2                                         |
| sp P16885 PLCG2_HUMAN | HUMAN | 1-phosphatidylinositol 4,5-bisphosphate phosphodiesterase gamma-2 OS=Homo sapiens OX=9606 GN=PLCG2 PE=1 SV=4 |
| sp P52888 THOP1_HUMAN | HUMAN | Thimet oligopeptidase OS=Homo sapiens OX=9606 GN=THOP1 PE=1 SV=2                                             |
| sp P48426 PI42A_HUMAN | HUMAN | Phosphatidylinositol 5-phosphate 4-kinase type-2 alpha OS=Homo sapiens OX=9606 GN=PIP4K2A PE=1 SV=2          |
| sp Q16181 SEPT7_HUMAN | HUMAN | Septin-7 OS=Homo sapiens OX=9606 GN=SEPTIN7 PE=1 SV=2                                                        |
| sp P62913 RL11_HUMAN  | HUMAN | 60S ribosomal protein L11 OS=Homo sapiens OX=9606 GN=RPL11 PE=1 SV=2                                         |
| sp O94819 KBTBB_HUMAN | HUMAN | Kelch repeat and BTB domain-containing protein 11 OS=Homo sapiens OX=9606 GN=KBTBD11 PE=1 SV=1               |
| sp O43447 PPIH_HUMAN  | HUMAN | Peptidyl-prolyl cis-trans isomerase H OS=Homo sapiens OX=9606 GN=PPIH PE=1 SV=1                              |
| sp O43488 ARK72_HUMAN | HUMAN | Aflatoxin B1 aldehyde reductase member 2 OS=Homo sapiens OX=9606 GN=AKR7A2 PE=1 SV=3                         |
| sp Q00534 CDK6_HUMAN  | HUMAN | Cyclin-dependent kinase 6 OS=Homo sapiens OX=9606 GN=CDK6 PE=1 SV=1                                          |
| sp O43390 HNRPR_HUMAN | HUMAN | Heterogeneous nuclear ribonucleoprotein R OS=Homo sapiens OX=9606 GN=HNRNPR PE=1 SV=1                        |
| sp P07108 ACBP_HUMAN  | HUMAN | Acyl-CoA-binding protein OS=Homo sapiens OX=9606 GN=DBI PE=1 SV=2                                            |
| sp P62263 RS14_HUMAN  | HUMAN | 40S ribosomal protein S14 OS=Homo sapiens OX=9606 GN=RPS14 PE=1 SV=3                                         |
| sp P11766 ADHX_HUMAN  | HUMAN | Alcohol dehydrogenase class-3 OS=Homo sapiens OX=9606 GN=ADH5 PE=1 SV=4                                      |
| sp Q01433 AMPD2_HUMAN | HUMAN | AMP deaminase 2 OS=Homo sapiens OX=9606 GN=AMPD2 PE=1 SV=2                                                   |
| sp P15374 UCHL3_HUMAN | HUMAN | Ubiquitin carboxyl-terminal hydrolase isozyme L3 OS=Homo sapiens OX=9606 GN=UCHL3 PE=1 SV=1                  |
| sp Q04637 IF4G1_HUMAN | HUMAN | Eukaryotic translation initiation factor 4 gamma 1 OS=Homo sapiens OX=9606 GN=EIF4G1 PE=1 SV=4               |
| sp Q9NYL9 TMOD3_HUMAN | HUMAN | Tropomodulin-3 OS=Homo sapiens OX=9606 GN=TMOD3 PE=1 SV=1                                                    |
| sp P39748 FEN1_HUMAN  | HUMAN | Flap endonuclease 1 OS=Homo sapiens OX=9606 GN=FEN1 PE=1 SV=1                                                |
| sp Q9BTM1 H2AJ_HUMAN  | HUMAN | Histone H2A.J OS=Homo sapiens OX=9606 GN=H2AFJ PE=1 SV=1                                                     |
| sp P10644 KAP0_HUMAN  | HUMAN | cAMP-dependent protein kinase type I-alpha regulatory subunit OS=Homo sapiens OX=9606 GN=PRKAR1A PE=1 SV=1   |
| sp P51812 KS6A3_HUMAN | HUMAN | Ribosomal protein S6 kinase alpha-3 OS=Homo sapiens OX=9606 GN=RPS6KA3 PE=1 SV=1                             |
| sp O15212 PFD6_HUMAN  | HUMAN | Prefoldin subunit 6 OS=Homo sapiens OX=9606 GN=PFDN6 PE=1 SV=1                                               |
| sp P61163 ACTZ_HUMAN  | HUMAN | Alpha-centractin OS=Homo sapiens OX=9606 GN=ACTR1A PE=1 SV=1                                                 |
| sp Q16836 HCDH_HUMAN  | HUMAN | Hydroxyacyl-coenzyme A dehydrogenase, mitochondrial OS=Homo sapiens OX=9606 GN=HADH PE=1 SV=3                |
| sp Q14847 LASP1_HUMAN | HUMAN | LIM and SH3 domain protein 1 OS=Homo sapiens OX=9606 GN=LASP1 PE=1 SV=2                                      |

|                        |       |                                                                                                               |
|------------------------|-------|---------------------------------------------------------------------------------------------------------------|
| sp P22061 PIMT_HUMAN   | HUMAN | Protein-L-isoaspartate(D-aspartate) O-methyltransferase OS=Homo sapiens OX=9606 GN=PCMT1 PE=1 SV=4            |
| sp O00442 RTCA_HUMAN   | HUMAN | RNA 3'-terminal phosphate cyclase OS=Homo sapiens OX=9606 GN=RTCA PE=1 SV=1                                   |
| sp Q15435 PP1R7_HUMAN  | HUMAN | Protein phosphatase 1 regulatory subunit 7 OS=Homo sapiens OX=9606 GN=PPP1R7 PE=1 SV=1                        |
| sp Q16630 CPSF6_HUMAN  | HUMAN | Cleavage and polyadenylation specificity factor subunit 6 OS=Homo sapiens OX=9606 GN=CPSF6 PE=1 SV=2          |
| sp P13716 HEM2_HUMAN   | HUMAN | Delta-aminolevulinic acid dehydratase OS=Homo sapiens OX=9606 GN=ALAD PE=1 SV=1                               |
| sp P62750 RL23A_HUMAN  | HUMAN | 60S ribosomal protein L23a OS=Homo sapiens OX=9606 GN=RPL23A PE=1 SV=1                                        |
| sp Q14839 CHD4_HUMAN   | HUMAN | Chromodomain-helicase-DNA-binding protein 4 OS=Homo sapiens OX=9606 GN=CHD4 PE=1 SV=2                         |
| sp Q8NCW5 NNRE_HUMAN   | HUMAN | NAD(P)H-hydrate epimerase OS=Homo sapiens OX=9606 GN=NAXE PE=1 SV=2                                           |
| sp P14314 GLU2B_HUMAN  | HUMAN | Glucosidase 2 subunit beta OS=Homo sapiens OX=9606 GN=PRKCSH PE=1 SV=2                                        |
| sp P68036 UB2L3_HUMAN  | HUMAN | Ubiquitin-conjugating enzyme E2 L3 OS=Homo sapiens OX=9606 GN=UBE2L3 PE=1 SV=1                                |
| sp Q53H82 LACTB2_HUMAN | HUMAN | Endoribonuclease LACTB2 OS=Homo sapiens OX=9606 GN=LACTB2 PE=1 SV=2                                           |
| sp P15586 GNS_HUMAN    | HUMAN | N-acetylglucosamine-6-sulfatase OS=Homo sapiens OX=9606 GN=GNS PE=1 SV=3                                      |
| sp Q9Y376 CAB39_HUMAN  | HUMAN | Calcium-binding protein 39 OS=Homo sapiens OX=9606 GN=CAB39 PE=1 SV=1                                         |
| sp Q13283 G3BP1_HUMAN  | HUMAN | Ras GTPase-activating protein-binding protein 1 OS=Homo sapiens OX=9606 GN=G3BP1 PE=1 SV=1                    |
| sp Q9ULZ3 ASC_HUMAN    | HUMAN | Apoptosis-associated speck-like protein containing a CARD OS=Homo sapiens OX=9606 GN=PYCARD PE=1 SV=2         |
| sp P62820 RAB1A_HUMAN  | HUMAN | Ras-related protein Rab-1A OS=Homo sapiens OX=9606 GN=RAB1A PE=1 SV=3                                         |
| sp O95861 BPNT1_HUMAN  | HUMAN | 3'(2'),5'-bisphosphate nucleotidase 1 OS=Homo sapiens OX=9606 GN=BPNT1 PE=1 SV=1                              |
| sp P18754 RCC1_HUMAN   | HUMAN | Regulator of chromosome condensation OS=Homo sapiens OX=9606 GN=RCC1 PE=1 SV=1                                |
| sp Q92890 UFD1_HUMAN   | HUMAN | Ubiquitin recognition factor in ER-associated degradation protein 1 OS=Homo sapiens OX=9606 GN=UFD1 PE=1 SV=3 |
| sp O00425 IF2B3_HUMAN  | HUMAN | Insulin-like growth factor 2 mRNA-binding protein 3 OS=Homo sapiens OX=9606 GN=IGF2BP3 PE=1 SV=2              |
| sp P67936 TPM4_HUMAN   | HUMAN | Tropomyosin alpha-4 chain OS=Homo sapiens OX=9606 GN=TPM4 PE=1 SV=3                                           |
| sp Q9Y5X3 SNX5_HUMAN   | HUMAN | Sorting nexin-5 OS=Homo sapiens OX=9606 GN=SNX5 PE=1 SV=1                                                     |
| sp Q9BPX3 CND3_HUMAN   | HUMAN | Condensin complex subunit 3 OS=Homo sapiens OX=9606 GN=NCAPG PE=1 SV=1                                        |
| sp Q15637 SF01_HUMAN   | HUMAN | Splicing factor 1 OS=Homo sapiens OX=9606 GN=SF1 PE=1 SV=4                                                    |
| sp O15160 RPAC1_HUMAN  | HUMAN | DNA-directed RNA polymerases I and III subunit RPAC1 OS=Homo sapiens OX=9606 GN=POLR1C PE=1 SV=1              |
| sp Q96C86 DCPS_HUMAN   | HUMAN | m7GpppX diphosphatase OS=Homo sapiens OX=9606 GN=DCPS PE=1 SV=2                                               |
| sp P51665 PSMD7_HUMAN  | HUMAN | 26S proteasome non-ATPase regulatory subunit 7 OS=Homo sapiens OX=9606 GN=PSMD7 PE=1 SV=2                     |
| sp P62987 RL40_HUMAN   | HUMAN | Ubiquitin-60S ribosomal protein L40 OS=Homo sapiens OX=9606 GN=UBA52 PE=1 SV=2                                |
| sp Q15185 TEBP_HUMAN   | HUMAN | Prostaglandin E synthase 3 OS=Homo sapiens OX=9606 GN=PTGES3 PE=1 SV=1                                        |

|                       |       |                                                                                                                  |
|-----------------------|-------|------------------------------------------------------------------------------------------------------------------|
| sp P23368 MAOM_HUMAN  | HUMAN | NAD-dependent malic enzyme, mitochondrial OS=Homo sapiens OX=9606 GN=ME2 PE=1 SV=1                               |
| sp Q92990 GLMN_HUMAN  | HUMAN | Glomulin OS=Homo sapiens OX=9606 GN=GLMN PE=1 SV=2                                                               |
| sp Q92619 HMHA1_HUMAN | HUMAN | Rho GTPase-activating protein 45 OS=Homo sapiens OX=9606 GN=ARHGAP45 PE=1 SV=2                                   |
| sp P68371 TBB4B_HUMAN | HUMAN | Tubulin beta-4B chain OS=Homo sapiens OX=9606 GN=TUBB4B PE=1 SV=1                                                |
| sp Q9H9T3 ELP3_HUMAN  | HUMAN | Elongator complex protein 3 OS=Homo sapiens OX=9606 GN=ELP3 PE=1 SV=2                                            |
| sp P26196 DDX6_HUMAN  | HUMAN | Probable ATP-dependent RNA helicase DDX6 OS=Homo sapiens OX=9606 GN=DDX6 PE=1 SV=2                               |
| sp P41227 NAA10_HUMAN | HUMAN | N-alpha-acetyltransferase 10 OS=Homo sapiens OX=9606 GN=NAA10 PE=1 SV=1                                          |
| sp Q9NXG2 THUM1_HUMAN | HUMAN | THUMP domain-containing protein 1 OS=Homo sapiens OX=9606 GN=THUMPD1 PE=1 SV=2                                   |
| sp Q8TAT6 NPL4_HUMAN  | HUMAN | Nuclear protein localization protein 4 homolog OS=Homo sapiens OX=9606 GN=NPLOC4 PE=1 SV=3                       |
| sp O43765 SGTA_HUMAN  | HUMAN | Small glutamine-rich tetratricopeptide repeat-containing protein alpha OS=Homo sapiens OX=9606 GN=SGTA PE=1 SV=1 |
| sp P61254 RL26_HUMAN  | HUMAN | 60S ribosomal protein L26 OS=Homo sapiens OX=9606 GN=RPL26 PE=1 SV=1                                             |
| sp P62899 RL31_HUMAN  | HUMAN | 60S ribosomal protein L31 OS=Homo sapiens OX=9606 GN=RPL31 PE=1 SV=1                                             |
| sp P62847 RS24_HUMAN  | HUMAN | 40S ribosomal protein S24 OS=Homo sapiens OX=9606 GN=RPS24 PE=1 SV=1                                             |
| sp Q9UJA5 TRM6_HUMAN  | HUMAN | tRNA (adenine(58)-N(1))-methyltransferase non-catalytic subunit TRM6 OS=Homo sapiens OX=9606 GN=TRMT6 PE=1 SV=1  |
| sp P18077 RL35A_HUMAN | HUMAN | 60S ribosomal protein L35a OS=Homo sapiens OX=9606 GN=RPL35A PE=1 SV=2                                           |
| sp O75348 VATG1_HUMAN | HUMAN | V-type proton ATPase subunit G 1 OS=Homo sapiens OX=9606 GN=ATP6V1G1 PE=1 SV=3                                   |
| sp Q9BUL8 PDC10_HUMAN | HUMAN | Programmed cell death protein 10 OS=Homo sapiens OX=9606 GN=PDCD10 PE=1 SV=1                                     |
| sp Q9UNH7 SNX6_HUMAN  | HUMAN | Sorting nexin-6 OS=Homo sapiens OX=9606 GN=SNX6 PE=1 SV=1                                                        |
| sp P30085 KCY_HUMAN   | HUMAN | UMP-CMP kinase OS=Homo sapiens OX=9606 GN=CMKP1 PE=1 SV=3                                                        |
| sp P08311 CATG_HUMAN  | HUMAN | Cathepsin G OS=Homo sapiens OX=9606 GN=CTSG PE=1 SV=2                                                            |
| sp Q13813 SPTN1_HUMAN | HUMAN | Spectrin alpha chain, non-erythrocytic 1 OS=Homo sapiens OX=9606 GN=SPTAN1 PE=1 SV=3                             |
| sp P23588 IF4B_HUMAN  | HUMAN | Eukaryotic translation initiation factor 4B OS=Homo sapiens OX=9606 GN=EIF4B PE=1 SV=2                           |
| sp Q99733 NP1L4_HUMAN | HUMAN | Nucleosome assembly protein 1-like 4 OS=Homo sapiens OX=9606 GN=NAP1L4 PE=1 SV=1                                 |
| sp Q06187 BTK_HUMAN   | HUMAN | Tyrosine-protein kinase BTK OS=Homo sapiens OX=9606 GN=BTK PE=1 SV=3                                             |
| sp Q9Y285 SYFA_HUMAN  | HUMAN | Phenylalanine--tRNA ligase alpha subunit OS=Homo sapiens OX=9606 GN=FARSA PE=1 SV=3                              |
| sp P49593 PPM1F_HUMAN | HUMAN | Protein phosphatase 1F OS=Homo sapiens OX=9606 GN=PPM1F PE=1 SV=3                                                |
| sp Q13617 CUL2_HUMAN  | HUMAN | Cullin-2 OS=Homo sapiens OX=9606 GN=CUL2 PE=1 SV=2                                                               |
| sp O60610 DIAP1_HUMAN | HUMAN | Protein diaphanous homolog 1 OS=Homo sapiens OX=9606 GN=DIAPH1 PE=1 SV=2                                         |
| sp P26447 S10A4_HUMAN | HUMAN | Protein S100-A4 OS=Homo sapiens OX=9606 GN=S100A4 PE=1 SV=1                                                      |
| sp Q07020 RL18_HUMAN  | HUMAN | 60S ribosomal protein L18 OS=Homo sapiens OX=9606 GN=RPL18 PE=1 SV=2                                             |

|                       |       |                                                                                                           |
|-----------------------|-------|-----------------------------------------------------------------------------------------------------------|
| sp Q9Y606 TRUA_HUMAN  | HUMAN | tRNA pseudouridine synthase A OS=Homo sapiens OX=9606 GN=PUS1 PE=1 SV=3                                   |
| sp Q13765 NACA_HUMAN  | HUMAN | Nascent polypeptide-associated complex subunit alpha OS=Homo sapiens OX=9606 GN=NACA PE=1 SV=1            |
| sp O00754 MA2B1_HUMAN | HUMAN | Lysosomal alpha-mannosidase OS=Homo sapiens OX=9606 GN=MAN2B1 PE=1 SV=3                                   |
| sp Q92597 NDRG1_HUMAN | HUMAN | Protein NDRG1 OS=Homo sapiens OX=9606 GN=NDRG1 PE=1 SV=1                                                  |
| sp Q9UKF6 CPSF3_HUMAN | HUMAN | Cleavage and polyadenylation specificity factor subunit 3 OS=Homo sapiens OX=9606 GN=CPSF3 PE=1 SV=1      |
| sp P60866 RS20_HUMAN  | HUMAN | 40S ribosomal protein S20 OS=Homo sapiens OX=9606 GN=RPS20 PE=1 SV=1                                      |
| sp Q07955 SRSF1_HUMAN | HUMAN | Serine/arginine-rich splicing factor 1 OS=Homo sapiens OX=9606 GN=SRSF1 PE=1 SV=2                         |
| sp O43252 PAPS1_HUMAN | HUMAN | Bifunctional 3'-phosphoadenosine 5'-phosphosulfate synthase 1 OS=Homo sapiens OX=9606 GN=PAPSS1 PE=1 SV=2 |
| sp Q13442 HAP28_HUMAN | HUMAN | 28 kDa heat- and acid-stable phosphoprotein OS=Homo sapiens OX=9606 GN=PDAP1 PE=1 SV=1                    |
| sp P28074 PSB5_HUMAN  | HUMAN | Proteasome subunit beta type-5 OS=Homo sapiens OX=9606 GN=PSMB5 PE=1 SV=3                                 |
| sp P49902 5NTC_HUMAN  | HUMAN | Cytosolic purine 5'-nucleotidase OS=Homo sapiens OX=9606 GN=NT5C2 PE=1 SV=1                               |
| sp Q9Y6A5 TACC3_HUMAN | HUMAN | Transforming acidic coiled-coil-containing protein 3 OS=Homo sapiens OX=9606 GN=TACC3 PE=1 SV=1           |
| sp P20073 ANXA7_HUMAN | HUMAN | Annexin A7 OS=Homo sapiens OX=9606 GN=ANXA7 PE=1 SV=3                                                     |
| sp P54687 BCAT1_HUMAN | HUMAN | Branched-chain-amino-acid aminotransferase, cytosolic OS=Homo sapiens OX=9606 GN=BCAT1 PE=1 SV=3          |
| sp Q96Q11 TRNT1_HUMAN | HUMAN | CCA tRNA nucleotidyltransferase 1, mitochondrial OS=Homo sapiens OX=9606 GN=TRNT1 PE=1 SV=2               |
| sp Q15019 SEPT2_HUMAN | HUMAN | Septin-2 OS=Homo sapiens OX=9606 GN=SEPTIN2 PE=1 SV=1                                                     |
| sp Q13185 CBX3_HUMAN  | HUMAN | Chromobox protein homolog 3 OS=Homo sapiens OX=9606 GN=CBX3 PE=1 SV=4                                     |
| sp Q16666 IFI16_HUMAN | HUMAN | Gamma-interferon-inducible protein 16 OS=Homo sapiens OX=9606 GN=IFI16 PE=1 SV=3                          |
| sp Q9NQ48 LZTL1_HUMAN | HUMAN | Leucine zipper transcription factor-like protein 1 OS=Homo sapiens OX=9606 GN=LZTFL1 PE=1 SV=1            |
| sp P52306 GDS1_HUMAN  | HUMAN | Rap1 GTPase-GDP dissociation stimulator 1 OS=Homo sapiens OX=9606 GN=RAP1GDS1 PE=1 SV=3                   |
| sp Q9UKD2 MRT4_HUMAN  | HUMAN | mRNA turnover protein 4 homolog OS=Homo sapiens OX=9606 GN=MRT04 PE=1 SV=2                                |
| sp Q8IYS1 P20D2_HUMAN | HUMAN | Peptidase M20 domain-containing protein 2 OS=Homo sapiens OX=9606 GN=PM20D2 PE=1 SV=2                     |
| sp Q9Y2L1 RRP44_HUMAN | HUMAN | Exosome complex exonuclease RRP44 OS=Homo sapiens OX=9606 GN=DIS3 PE=1 SV=2                               |
| sp O14737 PDCD5_HUMAN | HUMAN | Programmed cell death protein 5 OS=Homo sapiens OX=9606 GN=PDCD5 PE=1 SV=3                                |
| sp Q5TFE4 NT5D1_HUMAN | HUMAN | 5'-nucleotidase domain-containing protein 1 OS=Homo sapiens OX=9606 GN=NT5DC1 PE=1 SV=1                   |
| sp P35908 K22E_HUMAN  | HUMAN | Keratin, type II cytoskeletal 2 epidermal OS=Homo sapiens OX=9606 GN=KRT2 PE=1 SV=2                       |
| sp Q9UHX1 PUF60_HUMAN | HUMAN | Poly(U)-binding-splicing factor PUF60 OS=Homo sapiens OX=9606 GN=PUF60 PE=1 SV=1                          |
| sp Q06124 PTN11_HUMAN | HUMAN | Tyrosine-protein phosphatase non-receptor type 11 OS=Homo sapiens OX=9606 GN=PTPN11 PE=1 SV=3             |
| sp Q9UKY7 CDV3_HUMAN  | HUMAN | Protein CDV3 homolog OS=Homo sapiens OX=9606 GN=CDV3 PE=1 SV=1                                            |
| sp Q8NEZ5 FBX22_HUMAN | HUMAN | F-box only protein 22 OS=Homo sapiens OX=9606 GN=FBXO22 PE=1 SV=1                                         |

|                        |       |                                                                                                    |
|------------------------|-------|----------------------------------------------------------------------------------------------------|
| sp Q8WXX5 DNJC9_HUMAN  | HUMAN | DnaJ homolog subfamily C member 9 OS=Homo sapiens OX=9606 GN=DNAJC9 PE=1 SV=1                      |
| sp Q13418 ILK_HUMAN    | HUMAN | Integrin-linked protein kinase OS=Homo sapiens OX=9606 GN=ILK PE=1 SV=2                            |
| sp P68366 TBA4A_HUMAN  | HUMAN | Tubulin alpha-4A chain OS=Homo sapiens OX=9606 GN=TUBA4A PE=1 SV=1                                 |
| sp O95373 IPO7_HUMAN   | HUMAN | Importin-7 OS=Homo sapiens OX=9606 GN=IPO7 PE=1 SV=1                                               |
| sp P27635 RL10_HUMAN   | HUMAN | 60S ribosomal protein L10 OS=Homo sapiens OX=9606 GN=RPL10 PE=1 SV=4                               |
| sp Q9UHY7 ENOPH_HUMAN  | HUMAN | Enolase-phosphatase E1 OS=Homo sapiens OX=9606 GN=ENOPH1 PE=1 SV=1                                 |
| sp Q92769 HDAC2_HUMAN  | HUMAN | Histone deacetylase 2 OS=Homo sapiens OX=9606 GN=HDAC2 PE=1 SV=2                                   |
| sp Q9GZT8 NIF3L_HUMAN  | HUMAN | NIF3-like protein 1 OS=Homo sapiens OX=9606 GN=NIF3L1 PE=1 SV=2                                    |
| sp Q01130 SRSF2_HUMAN  | HUMAN | Serine/arginine-rich splicing factor 2 OS=Homo sapiens OX=9606 GN=SRSF2 PE=1 SV=4                  |
| sp Q96I15 SCLY_HUMAN   | HUMAN | Selenocysteine lyase OS=Homo sapiens OX=9606 GN=SCLY PE=1 SV=4                                     |
| sp Q14CX7 NAA25_HUMAN  | HUMAN | N-alpha-acetyltransferase 25, NatB auxiliary subunit OS=Homo sapiens OX=9606 GN=NAA25 PE=1 SV=1    |
| sp P84103 SRSF3_HUMAN  | HUMAN | Serine/arginine-rich splicing factor 3 OS=Homo sapiens OX=9606 GN=SRSF3 PE=1 SV=1                  |
| sp P62942 FKBP1A_HUMAN | HUMAN | Peptidyl-prolyl cis-trans isomerase FKBP1A OS=Homo sapiens OX=9606 GN=FKBP1A PE=1 SV=2             |
| sp P50914 RL14_HUMAN   | HUMAN | 60S ribosomal protein L14 OS=Homo sapiens OX=9606 GN=RPL14 PE=1 SV=4                               |
| sp P46782 RS5_HUMAN    | HUMAN | 40S ribosomal protein S5 OS=Homo sapiens OX=9606 GN=RPS5 PE=1 SV=4                                 |
| sp P38159 RBMX_HUMAN   | HUMAN | RNA-binding motif protein, X chromosome OS=Homo sapiens OX=9606 GN=RBMX PE=1 SV=3                  |
| sp P24666 PPAC_HUMAN   | HUMAN | Low molecular weight phosphotyrosine protein phosphatase OS=Homo sapiens OX=9606 GN=ACP1 PE=1 SV=3 |
| sp P08243 ASNS_HUMAN   | HUMAN | Asparagine synthetase [glutamine-hydrolyzing] OS=Homo sapiens OX=9606 GN=ASNS PE=1 SV=4            |
| sp Q9UNS2 CSN3_HUMAN   | HUMAN | COP9 signalosome complex subunit 3 OS=Homo sapiens OX=9606 GN=COPS3 PE=1 SV=3                      |
| sp Q9Y6G9 DC1L1_HUMAN  | HUMAN | Cytoplasmic dynein 1 light intermediate chain 1 OS=Homo sapiens OX=9606 GN=DYNC1L1 PE=1 SV=3       |
| sp P63279 UBC9_HUMAN   | HUMAN | SUMO-conjugating enzyme UBC9 OS=Homo sapiens OX=9606 GN=UBE2I PE=1 SV=1                            |
| sp P78330 SERB_HUMAN   | HUMAN | Phosphoserine phosphatase OS=Homo sapiens OX=9606 GN=PSPH PE=1 SV=2                                |
| sp P84098 RL19_HUMAN   | HUMAN | 60S ribosomal protein L19 OS=Homo sapiens OX=9606 GN=RPL19 PE=1 SV=1                               |
| sp P28482 MK01_HUMAN   | HUMAN | Mitogen-activated protein kinase 1 OS=Homo sapiens OX=9606 GN=MAPK1 PE=1 SV=3                      |
| sp P35637 FUS_HUMAN    | HUMAN | RNA-binding protein FUS OS=Homo sapiens OX=9606 GN=FUS PE=1 SV=1                                   |
| sp P07384 CAN1_HUMAN   | HUMAN | Calpain-1 catalytic subunit OS=Homo sapiens OX=9606 GN=CAPN1 PE=1 SV=1                             |
| sp Q16644 MAPK3_HUMAN  | HUMAN | MAP kinase-activated protein kinase 3 OS=Homo sapiens OX=9606 GN=MAPKAPK3 PE=1 SV=1                |
| sp O60701 UGDH_HUMAN   | HUMAN | UDP-glucose 6-dehydrogenase OS=Homo sapiens OX=9606 GN=UGDH PE=1 SV=1                              |
| sp P42285 MTREX_HUMAN  | HUMAN | Exosome RNA helicase MTR4 OS=Homo sapiens OX=9606 GN=MTREX PE=1 SV=3                               |
| sp O43324 MCA3_HUMAN   | HUMAN | Eukaryotic translation elongation factor 1 epsilon-1 OS=Homo sapiens OX=9606 GN=EEF1E1 PE=1 SV=1   |

|                       |       |                                                                                                                           |
|-----------------------|-------|---------------------------------------------------------------------------------------------------------------------------|
| sp P43246 MSH2_HUMAN  | HUMAN | DNA mismatch repair protein Msh2 OS=Homo sapiens OX=9606 GN=MSH2 PE=1 SV=1                                                |
| sp Q8TDP1 RNH2C_HUMAN | HUMAN | Ribonuclease H2 subunit C OS=Homo sapiens OX=9606 GN=RNASEH2C PE=1 SV=1                                                   |
| sp P28066 PSA5_HUMAN  | HUMAN | Proteasome subunit alpha type-5 OS=Homo sapiens OX=9606 GN=PSMA5 PE=1 SV=3                                                |
| sp P09651 ROA1_HUMAN  | HUMAN | Heterogeneous nuclear ribonucleoprotein A1 OS=Homo sapiens OX=9606 GN=HNRNPA1 PE=1 SV=5                                   |
| sp O15145 ARPC3_HUMAN | HUMAN | Actin-related protein 2/3 complex subunit 3 OS=Homo sapiens OX=9606 GN=ARPC3 PE=1 SV=3                                    |
| sp Q6FI81 CPIN1_HUMAN | HUMAN | Anamorsin OS=Homo sapiens OX=9606 GN=CIAPIN1 PE=1 SV=2                                                                    |
| sp P62314 SMD1_HUMAN  | HUMAN | Small nuclear ribonucleoprotein Sm D1 OS=Homo sapiens OX=9606 GN=SNRPD1 PE=1 SV=1                                         |
| sp P08708 RS17_HUMAN  | HUMAN | 40S ribosomal protein S17 OS=Homo sapiens OX=9606 GN=RPS17 PE=1 SV=2                                                      |
| sp P09525 ANXA4_HUMAN | HUMAN | Annexin A4 OS=Homo sapiens OX=9606 GN=ANXA4 PE=1 SV=4                                                                     |
| sp Q13057 COASY_HUMAN | HUMAN | Bifunctional coenzyme A synthase OS=Homo sapiens OX=9606 GN=COASY PE=1 SV=4                                               |
| sp P52597 HNRPF_HUMAN | HUMAN | Heterogeneous nuclear ribonucleoprotein F OS=Homo sapiens OX=9606 GN=HNRNPF PE=1 SV=3                                     |
| sp P46063 RECQ1_HUMAN | HUMAN | ATP-dependent DNA helicase Q1 OS=Homo sapiens OX=9606 GN=RECQL PE=1 SV=3                                                  |
| sp Q99471 PFD5_HUMAN  | HUMAN | Prefoldin subunit 5 OS=Homo sapiens OX=9606 GN=PFDN5 PE=1 SV=2                                                            |
| sp Q16186 ADRM1_HUMAN | HUMAN | Proteasomal ubiquitin receptor ADRM1 OS=Homo sapiens OX=9606 GN=ADRM1 PE=1 SV=2                                           |
| sp P04080 CYTB_HUMAN  | HUMAN | Cystatin-B OS=Homo sapiens OX=9606 GN=CSTB PE=1 SV=2                                                                      |
| sp Q9NTM9 CUTC_HUMAN  | HUMAN | Copper homeostasis protein cutC homolog OS=Homo sapiens OX=9606 GN=CUTC PE=1 SV=1                                         |
| sp P04632 CPNS1_HUMAN | HUMAN | Calpain small subunit 1 OS=Homo sapiens OX=9606 GN=CAPNS1 PE=1 SV=1                                                       |
| sp O94804 STK10_HUMAN | HUMAN | Serine/threonine-protein kinase 10 OS=Homo sapiens OX=9606 GN=STK10 PE=1 SV=1                                             |
| sp P26583 HMGB2_HUMAN | HUMAN | High mobility group protein B2 OS=Homo sapiens OX=9606 GN=HMGB2 PE=1 SV=2                                                 |
| sp Q9UBQ5 EIF3K_HUMAN | HUMAN | Eukaryotic translation initiation factor 3 subunit K OS=Homo sapiens OX=9606 GN=EIF3K PE=1 SV=1                           |
| sp Q13162 PRDX4_HUMAN | HUMAN | Peroxiredoxin-4 OS=Homo sapiens OX=9606 GN=PRDX4 PE=1 SV=1                                                                |
| sp Q9Y3U8 RL36_HUMAN  | HUMAN | 60S ribosomal protein L36 OS=Homo sapiens OX=9606 GN=RPL36 PE=1 SV=3                                                      |
| sp Q96B97 SH3K1_HUMAN | HUMAN | SH3 domain-containing kinase-binding protein 1 OS=Homo sapiens OX=9606 GN=SH3KBP1 PE=1 SV=2                               |
| sp Q13043 STK4_HUMAN  | HUMAN | Serine/threonine-protein kinase 4 OS=Homo sapiens OX=9606 GN=STK4 PE=1 SV=2                                               |
| sp Q8NBJ7 SUMF2_HUMAN | HUMAN | Inactive C-alpha-formylglycine-generating enzyme 2 OS=Homo sapiens OX=9606 GN=SUMF2 PE=1 SV=2                             |
| sp P08559 ODPA_HUMAN  | HUMAN | Pyruvate dehydrogenase E1 component subunit alpha, somatic form, mitochondrial OS=Homo sapiens OX=9606 GN=PDHA1 PE=1 SV=3 |
| sp P61081 UBC12_HUMAN | HUMAN | NEDD8-conjugating enzyme Ubc12 OS=Homo sapiens OX=9606 GN=UBE2M PE=1 SV=1                                                 |
| sp P50452 SPB8_HUMAN  | HUMAN | Serpin B8 OS=Homo sapiens OX=9606 GN=SERPINB8 PE=1 SV=2                                                                   |
| sp P62633 CNBP_HUMAN  | HUMAN | Cellular nucleic acid-binding protein OS=Homo sapiens OX=9606 GN=CNBP PE=1 SV=1                                           |
| sp Q07021 C1QBP_HUMAN | HUMAN | Complement component 1 Q subcomponent-binding protein, mitochondrial OS=Homo sapiens OX=9606 GN=C1QBP PE=1 SV=1           |

|                        |       |                                                                                                    |
|------------------------|-------|----------------------------------------------------------------------------------------------------|
| sp Q15257 PTPA_HUMAN   | HUMAN | Serine/threonine-protein phosphatase 2A activator OS=Homo sapiens OX=9606 GN=PTPA PE=1 SV=3        |
| sp Q6P2E9 EDC4_HUMAN   | HUMAN | Enhancer of mRNA-decapping protein 4 OS=Homo sapiens OX=9606 GN=EDC4 PE=1 SV=1                     |
| sp O15372 EIF3H_HUMAN  | HUMAN | Eukaryotic translation initiation factor 3 subunit H OS=Homo sapiens OX=9606 GN=EIF3H PE=1 SV=1    |
| sp O00584 RNT2_HUMAN   | HUMAN | Ribonuclease T2 OS=Homo sapiens OX=9606 GN=RNASET2 PE=1 SV=2                                       |
| sp P55263 ADK_HUMAN    | HUMAN | Adenosine kinase OS=Homo sapiens OX=9606 GN=ADK PE=1 SV=2                                          |
| sp P49773 HINT1_HUMAN  | HUMAN | Histidine triad nucleotide-binding protein 1 OS=Homo sapiens OX=9606 GN=HINT1 PE=1 SV=2            |
| sp P06396 GELS_HUMAN   | HUMAN | Gelsolin OS=Homo sapiens OX=9606 GN=GSN PE=1 SV=1                                                  |
| sp Q16822 PCKGM_HUMAN  | HUMAN | Phosphoenolpyruvate carboxykinase [GTP], mitochondrial OS=Homo sapiens OX=9606 GN=PCK2 PE=1 SV=4   |
| sp Q14019 COTL1_HUMAN  | HUMAN | Coactosin-like protein OS=Homo sapiens OX=9606 GN=COTL1 PE=1 SV=3                                  |
| sp Q9C0C9 UBE2O_HUMAN  | HUMAN | (E3-independent) E2 ubiquitin-conjugating enzyme OS=Homo sapiens OX=9606 GN=UBE2O PE=1 SV=3        |
| sp O00629 IMA3_HUMAN   | HUMAN | Importin subunit alpha-3 OS=Homo sapiens OX=9606 GN=KPNA4 PE=1 SV=1                                |
| sp Q6PKG0 LARP1_HUMAN  | HUMAN | La-related protein 1 OS=Homo sapiens OX=9606 GN=LARP1 PE=1 SV=2                                    |
| sp Q7Z7A4 PXX_HUMAN    | HUMAN | PX domain-containing protein kinase-like protein OS=Homo sapiens OX=9606 GN=PXX PE=1 SV=1          |
| sp Q15121 PEA15_HUMAN  | HUMAN | Astrocytic phosphoprotein PEA-15 OS=Homo sapiens OX=9606 GN=PEA15 PE=1 SV=2                        |
| sp O00160 MYO1F_HUMAN  | HUMAN | Unconventional myosin-I f OS=Homo sapiens OX=9606 GN=MYO1F PE=1 SV=3                               |
| sp P13807 GYS1_HUMAN   | HUMAN | Glycogen [starch] synthase, muscle OS=Homo sapiens OX=9606 GN=GYS1 PE=1 SV=2                       |
| sp Q9UBQ0 VPS29_HUMAN  | HUMAN | Vacuolar protein sorting-associated protein 29 OS=Homo sapiens OX=9606 GN=VPS29 PE=1 SV=1          |
| sp O75821 EIF3G_HUMAN  | HUMAN | Eukaryotic translation initiation factor 3 subunit G OS=Homo sapiens OX=9606 GN=EIF3G PE=1 SV=2    |
| sp Q9Y2Z0 SGT1_HUMAN   | HUMAN | Protein SGT1 homolog OS=Homo sapiens OX=9606 GN=SUGT1 PE=1 SV=3                                    |
| sp Q7L2H7 EIF3M_HUMAN  | HUMAN | Eukaryotic translation initiation factor 3 subunit M OS=Homo sapiens OX=9606 GN=EIF3M PE=1 SV=1    |
| sp Q9BZQ8 NIBA1_HUMAN  | HUMAN | Protein Niban 1 OS=Homo sapiens OX=9606 GN=NIBAN1 PE=1 SV=1                                        |
| sp P40429 RL13A_HUMAN  | HUMAN | 60S ribosomal protein L13a OS=Homo sapiens OX=9606 GN=RPL13A PE=1 SV=2                             |
| sp Q9ULA0 DNPEP_HUMAN  | HUMAN | Aspartyl aminopeptidase OS=Homo sapiens OX=9606 GN=DNPEP PE=1 SV=1                                 |
| sp P62280 RS11_HUMAN   | HUMAN | 40S ribosomal protein S11 OS=Homo sapiens OX=9606 GN=RPS11 PE=1 SV=3                               |
| sp O60271 JIP4_HUMAN   | HUMAN | C-Jun-amino-terminal kinase-interacting protein 4 OS=Homo sapiens OX=9606 GN=SPAG9 PE=1 SV=4       |
| sp O00178 GTPBP1_HUMAN | HUMAN | GTP-binding protein 1 OS=Homo sapiens OX=9606 GN=GTPBP1 PE=1 SV=3                                  |
| sp Q9H3U1 UN45A_HUMAN  | HUMAN | Protein unc-45 homolog A OS=Homo sapiens OX=9606 GN=UNC45A PE=1 SV=1                               |
| sp O75436 VP26A_HUMAN  | HUMAN | Vacuolar protein sorting-associated protein 26A OS=Homo sapiens OX=9606 GN=VPS26A PE=1 SV=2        |
| sp Q9BQ52 RNZ2_HUMAN   | HUMAN | Zinc phosphodiesterase ELAC protein 2 OS=Homo sapiens OX=9606 GN=ELAC2 PE=1 SV=2                   |
| sp P27986 P85A_HUMAN   | HUMAN | Phosphatidylinositol 3-kinase regulatory subunit alpha OS=Homo sapiens OX=9606 GN=PIK3R1 PE=1 SV=2 |
| sp Q15907 RB11B_HUMAN  | HUMAN | Ras-related protein Rab-11B OS=Homo sapiens OX=9606 GN=RAB11B PE=1 SV=4                            |

|                       |       |                                                                                                                              |
|-----------------------|-------|------------------------------------------------------------------------------------------------------------------------------|
| sp Q09028 RBBP4_HUMAN | HUMAN | Histone-binding protein RBBP4 OS=Homo sapiens OX=9606 GN=RBBP4 PE=1 SV=3                                                     |
| sp Q92841 DDX17_HUMAN | HUMAN | Probable ATP-dependent RNA helicase DDX17 OS=Homo sapiens OX=9606 GN=DDX17 PE=1 SV=2                                         |
| sp Q96RU3 FNBP1_HUMAN | HUMAN | Formin-binding protein 1 OS=Homo sapiens OX=9606 GN=FNBP1 PE=1 SV=2                                                          |
| sp Q9BQE3 TBA1C_HUMAN | HUMAN | Tubulin alpha-1C chain OS=Homo sapiens OX=9606 GN=TUBA1C PE=1 SV=1                                                           |
| sp P38117 ETFB_HUMAN  | HUMAN | Electron transfer flavoprotein subunit beta OS=Homo sapiens OX=9606 GN=ETFB PE=1 SV=3                                        |
| sp Q13685 AAMP_HUMAN  | HUMAN | Angio-associated migratory cell protein OS=Homo sapiens OX=9606 GN=AAMP PE=1 SV=2                                            |
| sp P36551 HEM6_HUMAN  | HUMAN | Oxygen-dependent coproporphyrinogen-III oxidase, mitochondrial OS=Homo sapiens OX=9606 GN=CPOX PE=1 SV=3                     |
| sp P42166 LAP2A_HUMAN | HUMAN | Lamina-associated polypeptide 2, isoform alpha OS=Homo sapiens OX=9606 GN=TMPO PE=1 SV=2                                     |
| sp Q13907 IDI1_HUMAN  | HUMAN | Isopentenyl-diphosphate Delta-isomerase 1 OS=Homo sapiens OX=9606 GN=IDI1 PE=1 SV=2                                          |
| sp O60711 LPXN_HUMAN  | HUMAN | Leupaxin OS=Homo sapiens OX=9606 GN=LPXN PE=1 SV=1                                                                           |
| sp Q07866 KLC1_HUMAN  | HUMAN | Kinesin light chain 1 OS=Homo sapiens OX=9606 GN=KLC1 PE=1 SV=2                                                              |
| sp Q5JVF3 PCID2_HUMAN | HUMAN | PCI domain-containing protein 2 OS=Homo sapiens OX=9606 GN=PCID2 PE=1 SV=2                                                   |
| sp O43598 DNPH1_HUMAN | HUMAN | 2'-deoxynucleoside 5'-phosphate N-hydrolase 1 OS=Homo sapiens OX=9606 GN=DNPH1 PE=1 SV=1                                     |
| sp P21291 CSRP1_HUMAN | HUMAN | Cysteine and glycine-rich protein 1 OS=Homo sapiens OX=9606 GN=CSRP1 PE=1 SV=3                                               |
| sp Q9NYU2 UGGT1_HUMAN | HUMAN | UDP-glucose:glycoprotein glucosyltransferase 1 OS=Homo sapiens OX=9606 GN=UGGT1 PE=1 SV=3                                    |
| sp P67870 CSK2B_HUMAN | HUMAN | Casein kinase II subunit beta OS=Homo sapiens OX=9606 GN=CSNK2B PE=1 SV=1                                                    |
| sp Q14738 2A5D_HUMAN  | HUMAN | Serine/threonine-protein phosphatase 2A 56 kDa regulatory subunit delta isoform OS=Homo sapiens OX=9606 GN=PPP2R5D PE=1 SV=1 |
| sp P47813 IF1AX_HUMAN | HUMAN | Eukaryotic translation initiation factor 1A, X-chromosomal OS=Homo sapiens OX=9606 GN=EIF1AX PE=1 SV=2                       |
| sp P51452 DUS3_HUMAN  | HUMAN | Dual specificity protein phosphatase 3 OS=Homo sapiens OX=9606 GN=DUSP3 PE=1 SV=1                                            |
| sp Q14444 CAPR1_HUMAN | HUMAN | Caprin-1 OS=Homo sapiens OX=9606 GN=CAPRIN1 PE=1 SV=2                                                                        |
| sp Q96CW1 AP2M1_HUMAN | HUMAN | AP-2 complex subunit mu OS=Homo sapiens OX=9606 GN=AP2M1 PE=1 SV=2                                                           |
| sp P46926 GNPI1_HUMAN | HUMAN | Glucosamine-6-phosphate isomerase 1 OS=Homo sapiens OX=9606 GN=GNPDA1 PE=1 SV=1                                              |
| sp P18858 DNLI1_HUMAN | HUMAN | DNA ligase 1 OS=Homo sapiens OX=9606 GN=LIG1 PE=1 SV=1                                                                       |
| sp P40939 ECHA_HUMAN  | HUMAN | Trifunctional enzyme subunit alpha, mitochondrial OS=Homo sapiens OX=9606 GN=HADHA PE=1 SV=2                                 |
| sp Q08752 PPID_HUMAN  | HUMAN | Peptidyl-prolyl cis-trans isomerase D OS=Homo sapiens OX=9606 GN=PPID PE=1 SV=3                                              |
| sp Q99729 ROAA_HUMAN  | HUMAN | Heterogeneous nuclear ribonucleoprotein A/B OS=Homo sapiens OX=9606 GN=HNRNPAB PE=1 SV=2                                     |
| sp P84077 ARF1_HUMAN  | HUMAN | ADP-ribosylation factor 1 OS=Homo sapiens OX=9606 GN=ARF1 PE=1 SV=2                                                          |
| sp P30419 NMT1_HUMAN  | HUMAN | Glycylpeptide N-tetradecanoyltransferase 1 OS=Homo sapiens OX=9606 GN=NMT1 PE=1 SV=2                                         |
| sp P62917 RL8_HUMAN   | HUMAN | 60S ribosomal protein L8 OS=Homo sapiens OX=9606 GN=RPL8 PE=1 SV=2                                                           |

|                       |       |                                                                                              |
|-----------------------|-------|----------------------------------------------------------------------------------------------|
| sp P26368 U2AF2_HUMAN | HUMAN | Splicing factor U2AF 65 kDa subunit OS=Homo sapiens OX=9606 GN=U2AF2 PE=1 SV=4               |
| sp O43684 BUB3_HUMAN  | HUMAN | Mitotic checkpoint protein BUB3 OS=Homo sapiens OX=9606 GN=BUB3 PE=1 SV=1                    |
| sp Q9GZS3 WDR61_HUMAN | HUMAN | WD repeat-containing protein 61 OS=Homo sapiens OX=9606 GN=WDR61 PE=1 SV=1                   |
| sp Q96M27 PRRC1_HUMAN | HUMAN | Protein PRRC1 OS=Homo sapiens OX=9606 GN=PRRC1 PE=1 SV=1                                     |
| sp Q9HAV4 XPO5_HUMAN  | HUMAN | Exportin-5 OS=Homo sapiens OX=9606 GN=XPO5 PE=1 SV=1                                         |
| sp Q5TDH0 DDI2_HUMAN  | HUMAN | Protein DDI1 homolog 2 OS=Homo sapiens OX=9606 GN=DDI2 PE=1 SV=1                             |
| sp O75340 PDCD6_HUMAN | HUMAN | Programmed cell death protein 6 OS=Homo sapiens OX=9606 GN=PDCD6 PE=1 SV=1                   |
| sp Q7L5N1 CSN6_HUMAN  | HUMAN | COP9 signalosome complex subunit 6 OS=Homo sapiens OX=9606 GN=COPS6 PE=1 SV=1                |
| sp O60502 OGA_HUMAN   | HUMAN | Protein O-GlcNAcase OS=Homo sapiens OX=9606 GN=OGA PE=1 SV=2                                 |
| sp P62841 RS15_HUMAN  | HUMAN | 40S ribosomal protein S15 OS=Homo sapiens OX=9606 GN=RPS15 PE=1 SV=2                         |
| sp P08621 RU17_HUMAN  | HUMAN | U1 small nuclear ribonucleoprotein 70 kDa OS=Homo sapiens OX=9606 GN=SNRNP70 PE=1 SV=2       |
| sp P09622 DLDH_HUMAN  | HUMAN | Dihydrolipoyl dehydrogenase, mitochondrial OS=Homo sapiens OX=9606 GN=DLD PE=1 SV=2          |
| sp Q9BZZ5 API5_HUMAN  | HUMAN | Apoptosis inhibitor 5 OS=Homo sapiens OX=9606 GN=API5 PE=1 SV=3                              |
| sp P04183 KITH_HUMAN  | HUMAN | Thymidine kinase, cytosolic OS=Homo sapiens OX=9606 GN=TK1 PE=1 SV=2                         |
| sp Q9P2T1 GMPR2_HUMAN | HUMAN | GMP reductase 2 OS=Homo sapiens OX=9606 GN=GMPR2 PE=1 SV=1                                   |
| sp Q96I24 FUBP3_HUMAN | HUMAN | Far upstream element-binding protein 3 OS=Homo sapiens OX=9606 GN=FUBP3 PE=1 SV=2            |
| sp Q07960 RHG01_HUMAN | HUMAN | Rho GTPase-activating protein 1 OS=Homo sapiens OX=9606 GN=ARHGAP1 PE=1 SV=1                 |
| sp Q9P287 BCCIP_HUMAN | HUMAN | BRCA2 and CDKN1A-interacting protein OS=Homo sapiens OX=9606 GN=BCCIP PE=1 SV=1              |
| sp Q92882 OSTF1_HUMAN | HUMAN | Osteoclast-stimulating factor 1 OS=Homo sapiens OX=9606 GN=OSTF1 PE=1 SV=2                   |
| sp Q9UBB4 ATX10_HUMAN | HUMAN | Ataxin-10 OS=Homo sapiens OX=9606 GN=ATXN10 PE=1 SV=1                                        |
| sp Q8IVD9 NUDC3_HUMAN | HUMAN | NudC domain-containing protein 3 OS=Homo sapiens OX=9606 GN=NUDC3 PE=1 SV=3                  |
| sp Q96P70 IPO9_HUMAN  | HUMAN | Importin-9 OS=Homo sapiens OX=9606 GN=IPO9 PE=1 SV=3                                         |
| sp O75995 SASH3_HUMAN | HUMAN | SAM and SH3 domain-containing protein 3 OS=Homo sapiens OX=9606 GN=SASH3 PE=1 SV=2           |
| sp P28065 PSB9_HUMAN  | HUMAN | Proteasome subunit beta type-9 OS=Homo sapiens OX=9606 GN=PSMB9 PE=1 SV=2                    |
| sp P23921 RIR1_HUMAN  | HUMAN | Ribonucleoside-diphosphate reductase large subunit OS=Homo sapiens OX=9606 GN=RRM1 PE=1 SV=1 |
| sp P19784 CSK22_HUMAN | HUMAN | Casein kinase II subunit alpha' OS=Homo sapiens OX=9606 GN=CSNK2A2 PE=1 SV=1                 |
| sp O75531 BAF_HUMAN   | HUMAN | Barrier-to-autointegration factor OS=Homo sapiens OX=9606 GN=BANF1 PE=1 SV=1                 |
| sp Q9BYT8 NEUL_HUMAN  | HUMAN | Neurolysin, mitochondrial OS=Homo sapiens OX=9606 GN=NLN PE=1 SV=1                           |
| sp Q13619 CUL4A_HUMAN | HUMAN | Cullin-4A OS=Homo sapiens OX=9606 GN=CUL4A PE=1 SV=3                                         |
| sp Q15056 IF4H_HUMAN  | HUMAN | Eukaryotic translation initiation factor 4H OS=Homo sapiens OX=9606 GN=EIF4H PE=1 SV=5       |
| sp Q9NXR7 BABA2_HUMAN | HUMAN | BRISC and BRCA1-A complex member 2 OS=Homo sapiens OX=9606 GN=BABAM2 PE=1 SV=2               |

|                       |       |                                                                                                             |
|-----------------------|-------|-------------------------------------------------------------------------------------------------------------|
| sp Q9BRG1 VPS25_HUMAN | HUMAN | Vacuolar protein-sorting-associated protein 25 OS=Homo sapiens OX=9606 GN=VPS25 PE=1 SV=1                   |
| sp Q99447 PCY2_HUMAN  | HUMAN | Ethanolamine-phosphate cytidyltransferase OS=Homo sapiens OX=9606 GN=PCYT2 PE=1 SV=1                        |
| sp Q96FW1 OTUB1_HUMAN | HUMAN | Ubiquitin thioesterase OTUB1 OS=Homo sapiens OX=9606 GN=OTUB1 PE=1 SV=2                                     |
| sp Q15018 ABRX2_HUMAN | HUMAN | BRISC complex subunit Abraxas 2 OS=Homo sapiens OX=9606 GN=ABRAXAS2 PE=1 SV=2                               |
| sp P62316 SMD2_HUMAN  | HUMAN | Small nuclear ribonucleoprotein Sm D2 OS=Homo sapiens OX=9606 GN=SNRPD2 PE=1 SV=1                           |
| sp P55084 ECHB_HUMAN  | HUMAN | Trifunctional enzyme subunit beta, mitochondrial OS=Homo sapiens OX=9606 GN=HADHB PE=1 SV=3                 |
| sp P04179 SODM_HUMAN  | HUMAN | Superoxide dismutase [Mn], mitochondrial OS=Homo sapiens OX=9606 GN=SOD2 PE=1 SV=3                          |
| sp Q14240 IF4A2_HUMAN | HUMAN | Eukaryotic initiation factor 4A-II OS=Homo sapiens OX=9606 GN=EIF4A2 PE=1 SV=2                              |
| sp P15153 RAC2_HUMAN  | HUMAN | Ras-related C3 botulinum toxin substrate 2 OS=Homo sapiens OX=9606 GN=RAC2 PE=1 SV=1                        |
| sp O94979 SC31A_HUMAN | HUMAN | Protein transport protein Sec31A OS=Homo sapiens OX=9606 GN=SEC31A PE=1 SV=3                                |
| sp Q96EP5 DAZP1_HUMAN | HUMAN | DAZ-associated protein 1 OS=Homo sapiens OX=9606 GN=DAZAP1 PE=1 SV=1                                        |
| sp Q8WU90 ZC3HF_HUMAN | HUMAN | Zinc finger CCCH domain-containing protein 15 OS=Homo sapiens OX=9606 GN=ZC3H15 PE=1 SV=1                   |
| sp P14678 RSMB_HUMAN  | HUMAN | Small nuclear ribonucleoprotein-associated proteins B and B' OS=Homo sapiens OX=9606 GN=SNRPB PE=1 SV=2     |
| sp Q9UKX7 NUP50_HUMAN | HUMAN | Nuclear pore complex protein Nup50 OS=Homo sapiens OX=9606 GN=NUP50 PE=1 SV=2                               |
| sp Q9NZT2 OGFR_HUMAN  | HUMAN | Opioid growth factor receptor OS=Homo sapiens OX=9606 GN=OGFR PE=1 SV=3                                     |
| sp Q86V81 THOC4_HUMAN | HUMAN | THO complex subunit 4 OS=Homo sapiens OX=9606 GN=ALYREF PE=1 SV=3                                           |
| sp Q9UK76 JUPI1_HUMAN | HUMAN | Jupiter microtubule associated homolog 1 OS=Homo sapiens OX=9606 GN=JPT1 PE=1 SV=3                          |
| sp Q9NX46 ARHL2_HUMAN | HUMAN | ADP-ribose glycohydrolase ARH3 OS=Homo sapiens OX=9606 GN=ADPRHL2 PE=1 SV=1                                 |
| sp Q9H0R4 HDHD2_HUMAN | HUMAN | Haloacid dehalogenase-like hydrolase domain-containing protein 2 OS=Homo sapiens OX=9606 GN=HDHD2 PE=1 SV=1 |
| sp Q9C0B1 FTO_HUMAN   | HUMAN | Alpha-ketoglutarate-dependent dioxygenase FTO OS=Homo sapiens OX=9606 GN=FTO PE=1 SV=3                      |
| sp Q96GK7 FAH2A_HUMAN | HUMAN | Fumarylacetoacetate hydrolase domain-containing protein 2A OS=Homo sapiens OX=9606 GN=FAHD2A PE=1 SV=1      |
| sp Q96FJ2 DYL2_HUMAN  | HUMAN | Dynein light chain 2, cytoplasmic OS=Homo sapiens OX=9606 GN=DYNLL2 PE=1 SV=1                               |
| sp Q13526 PIN1_HUMAN  | HUMAN | Peptidyl-prolyl cis-trans isomerase NIMA-interacting 1 OS=Homo sapiens OX=9606 GN=PIN1 PE=1 SV=1            |
| sp P62318 SMD3_HUMAN  | HUMAN | Small nuclear ribonucleoprotein Sm D3 OS=Homo sapiens OX=9606 GN=SNRPD3 PE=1 SV=1                           |
| sp P62269 RS18_HUMAN  | HUMAN | 40S ribosomal protein S18 OS=Homo sapiens OX=9606 GN=RPS18 PE=1 SV=3                                        |
| sp P55957 BID_HUMAN   | HUMAN | BH3-interacting domain death agonist OS=Homo sapiens OX=9606 GN=BID PE=1 SV=1                               |
| sp P36543 VATE1_HUMAN | HUMAN | V-type proton ATPase subunit E 1 OS=Homo sapiens OX=9606 GN=ATP6V1E1 PE=1 SV=1                              |
| sp P28072 PSB6_HUMAN  | HUMAN | Proteasome subunit beta type-6 OS=Homo sapiens OX=9606 GN=PSMB6 PE=1 SV=4                                   |
| sp P08579 RU2B_HUMAN  | HUMAN | U2 small nuclear ribonucleoprotein B'' OS=Homo sapiens OX=9606 GN=SNRPB2 PE=1 SV=1                          |

|                       |       |                                                                                                              |
|-----------------------|-------|--------------------------------------------------------------------------------------------------------------|
| sp O75223 GGCT_HUMAN  | HUMAN | Gamma-glutamylcyclotransferase OS=Homo sapiens OX=9606 GN=GGCT PE=1 SV=1                                     |
| sp O15382 BCAT2_HUMAN | HUMAN | Branched-chain-amino-acid aminotransferase, mitochondrial OS=Homo sapiens OX=9606 GN=BCAT2 PE=1 SV=2         |
| sp Q969T9 WBP2_HUMAN  | HUMAN | WW domain-binding protein 2 OS=Homo sapiens OX=9606 GN=WBP2 PE=1 SV=1                                        |
| sp Q9H0C8 ILKAP_HUMAN | HUMAN | Integrin-linked kinase-associated serine/threonine phosphatase 2C OS=Homo sapiens OX=9606 GN=ILKAP PE=1 SV=1 |
| sp P09496 CLCA_HUMAN  | HUMAN | Clathrin light chain A OS=Homo sapiens OX=9606 GN=CLTA PE=1 SV=1                                             |
| sp P51692 STA5B_HUMAN | HUMAN | Signal transducer and activator of transcription 5B OS=Homo sapiens OX=9606 GN=STAT5B PE=1 SV=2              |
| sp Q9NP79 VTA1_HUMAN  | HUMAN | Vacuolar protein sorting-associated protein VTA1 homolog OS=Homo sapiens OX=9606 GN=VTA1 PE=1 SV=1           |
| sp P19105 ML12A_HUMAN | HUMAN | Myosin regulatory light chain 12A OS=Homo sapiens OX=9606 GN=MYL12A PE=1 SV=2                                |
| sp Q7L1Q6 BZW1_HUMAN  | HUMAN | Basic leucine zipper and W2 domain-containing protein 1 OS=Homo sapiens OX=9606 GN=BZW1 PE=1 SV=1            |
| sp Q9H2U2 IPYR2_HUMAN | HUMAN | Inorganic pyrophosphatase 2, mitochondrial OS=Homo sapiens OX=9606 GN=PPA2 PE=1 SV=2                         |
| sp P11310 ACADM_HUMAN | HUMAN | Medium-chain specific acyl-CoA dehydrogenase, mitochondrial OS=Homo sapiens OX=9606 GN=ACADM PE=1 SV=1       |
| sp Q99627 CSN8_HUMAN  | HUMAN | COP9 signalosome complex subunit 8 OS=Homo sapiens OX=9606 GN=COPS8 PE=1 SV=1                                |
| sp P62910 RL32_HUMAN  | HUMAN | 60S ribosomal protein L32 OS=Homo sapiens OX=9606 GN=RPL32 PE=1 SV=2                                         |
| sp P02533 K1C14_HUMAN | HUMAN | Keratin, type I cytoskeletal 14 OS=Homo sapiens OX=9606 GN=KRT14 PE=1 SV=4                                   |
| sp P23919 KTHY_HUMAN  | HUMAN | Thymidylate kinase OS=Homo sapiens OX=9606 GN=DTYMK PE=1 SV=4                                                |
| sp P06865 HEXA_HUMAN  | HUMAN | Beta-hexosaminidase subunit alpha OS=Homo sapiens OX=9606 GN=HEXA PE=1 SV=2                                  |
| sp P46109 CRKL_HUMAN  | HUMAN | Crk-like protein OS=Homo sapiens OX=9606 GN=CRKL PE=1 SV=1                                                   |
| sp Q5TBB1 RNH2B_HUMAN | HUMAN | Ribonuclease H2 subunit B OS=Homo sapiens OX=9606 GN=RNASEH2B PE=1 SV=1                                      |
| sp P52789 H XK2_HUMAN | HUMAN | Hexokinase-2 OS=Homo sapiens OX=9606 GN=HK2 PE=1 SV=2                                                        |
| sp Q9UN86 G3BP2_HUMAN | HUMAN | Ras GTPase-activating protein-binding protein 2 OS=Homo sapiens OX=9606 GN=G3BP2 PE=1 SV=2                   |
| sp Q9H299 SH3L3_HUMAN | HUMAN | SH3 domain-binding glutamic acid-rich-like protein 3 OS=Homo sapiens OX=9606 GN=SH3BGR3 PE=1 SV=1            |
| sp O60234 GMFG_HUMAN  | HUMAN | Glia maturation factor gamma OS=Homo sapiens OX=9606 GN=GMFG PE=1 SV=1                                       |
| sp Q13310 PABP4_HUMAN | HUMAN | Polyadenylate-binding protein 4 OS=Homo sapiens OX=9606 GN=PABPC4 PE=1 SV=1                                  |
| sp Q03154 ACY1_HUMAN  | HUMAN | Aminoacylase-1 OS=Homo sapiens OX=9606 GN=ACY1 PE=1 SV=1                                                     |
| sp Q96HE7 ERO1A_HUMAN | HUMAN | ERO1-like protein alpha OS=Homo sapiens OX=9606 GN=ERO1A PE=1 SV=2                                           |
| sp O60925 PFD1_HUMAN  | HUMAN | Prefoldin subunit 1 OS=Homo sapiens OX=9606 GN=PFDN1 PE=1 SV=2                                               |
| sp P62854 RS26_HUMAN  | HUMAN | 40S ribosomal protein S26 OS=Homo sapiens OX=9606 GN=RPS26 PE=1 SV=3                                         |
| sp Q15819 UB2V2_HUMAN | HUMAN | Ubiquitin-conjugating enzyme E2 variant 2 OS=Homo sapiens OX=9606 GN=UBE2V2 PE=1 SV=4                        |

|                       |       |                                                                                                                     |
|-----------------------|-------|---------------------------------------------------------------------------------------------------------------------|
| sp P42768 WASP_HUMAN  | HUMAN | Wiskott-Aldrich syndrome protein OS=Homo sapiens OX=9606 GN=WAS PE=1 SV=4                                           |
| sp Q14157 UBP2L_HUMAN | HUMAN | Ubiquitin-associated protein 2-like OS=Homo sapiens OX=9606 GN=UBAP2L PE=1 SV=2                                     |
| sp P42126 ECI1_HUMAN  | HUMAN | Enoyl-CoA delta isomerase 1, mitochondrial OS=Homo sapiens OX=9606 GN=ECI1 PE=1 SV=1                                |
| sp Q9UHV9 PFD2_HUMAN  | HUMAN | Prefoldin subunit 2 OS=Homo sapiens OX=9606 GN=PFDN2 PE=1 SV=1                                                      |
| sp P99999 CYC_HUMAN   | HUMAN | Cytochrome c OS=Homo sapiens OX=9606 GN=CYCS PE=1 SV=2                                                              |
| sp O60684 IMA7_HUMAN  | HUMAN | Importin subunit alpha-7 OS=Homo sapiens OX=9606 GN=KPNA6 PE=1 SV=1                                                 |
| sp Q12931 TRAP1_HUMAN | HUMAN | Heat shock protein 75 kDa, mitochondrial OS=Homo sapiens OX=9606 GN=TRAP1 PE=1 SV=3                                 |
| sp Q6NYC1 JMJD6_HUMAN | HUMAN | Bifunctional arginine demethylase and lysyl-hydroxylase JMJD6 OS=Homo sapiens OX=9606 GN=JMJD6 PE=1 SV=1            |
| sp P61513 RL37A_HUMAN | HUMAN | 60S ribosomal protein L37a OS=Homo sapiens OX=9606 GN=RPL37A PE=1 SV=2                                              |
| sp P51148 RAB5C_HUMAN | HUMAN | Ras-related protein Rab-5C OS=Homo sapiens OX=9606 GN=RAB5C PE=1 SV=2                                               |
| sp Q16629 SRSF7_HUMAN | HUMAN | Serine/arginine-rich splicing factor 7 OS=Homo sapiens OX=9606 GN=SRSF7 PE=1 SV=1                                   |
| sp O00233 PSMD9_HUMAN | HUMAN | 26S proteasome non-ATPase regulatory subunit 9 OS=Homo sapiens OX=9606 GN=PSMD9 PE=1 SV=3                           |
| sp Q15080 NCF4_HUMAN  | HUMAN | Neutrophil cytosol factor 4 OS=Homo sapiens OX=9606 GN=NCF4 PE=1 SV=2                                               |
| sp P35659 DEK_HUMAN   | HUMAN | Protein DEK OS=Homo sapiens OX=9606 GN=DEK PE=1 SV=1                                                                |
| sp Q13510 ASA1_HUMAN  | HUMAN | Acid ceramidase OS=Homo sapiens OX=9606 GN=ASA1 PE=1 SV=5                                                           |
| sp Q0VDF9 HSP7E_HUMAN | HUMAN | Heat shock 70 kDa protein 14 OS=Homo sapiens OX=9606 GN=HSPA14 PE=1 SV=1                                            |
| sp Q969H8 MYDGF_HUMAN | HUMAN | Myeloid-derived growth factor OS=Homo sapiens OX=9606 GN=MYDGF PE=1 SV=1                                            |
| sp Q16204 CCDC6_HUMAN | HUMAN | Coiled-coil domain-containing protein 6 OS=Homo sapiens OX=9606 GN=CCDC6 PE=1 SV=2                                  |
| sp O95671 ASML_HUMAN  | HUMAN | Probable bifunctional dTTP/UTP pyrophosphatase/methyltransferase protein OS=Homo sapiens OX=9606 GN=ASMTL PE=1 SV=3 |
| sp Q14C86 GAPD1_HUMAN | HUMAN | GTPase-activating protein and VPS9 domain-containing protein 1 OS=Homo sapiens OX=9606 GN=GAPVD1 PE=1 SV=2          |
| sp Q13409 DC1I2_HUMAN | HUMAN | Cytoplasmic dynein 1 intermediate chain 2 OS=Homo sapiens OX=9606 GN=DYNC1I2 PE=1 SV=3                              |
| sp P30084 ECHM_HUMAN  | HUMAN | Enoyl-CoA hydratase, mitochondrial OS=Homo sapiens OX=9606 GN=ECHS1 PE=1 SV=4                                       |
| sp Q86VN1 VPS36_HUMAN | HUMAN | Vacuolar protein-sorting-associated protein 36 OS=Homo sapiens OX=9606 GN=VPS36 PE=1 SV=1                           |
| sp P43243 MATR3_HUMAN | HUMAN | Matrin-3 OS=Homo sapiens OX=9606 GN=MATR3 PE=1 SV=2                                                                 |
| sp Q13616 CUL1_HUMAN  | HUMAN | Cullin-1 OS=Homo sapiens OX=9606 GN=CUL1 PE=1 SV=2                                                                  |
| sp P46776 RL27A_HUMAN | HUMAN | 60S ribosomal protein L27a OS=Homo sapiens OX=9606 GN=RPL27A PE=1 SV=2                                              |
| sp P34949 MPI_HUMAN   | HUMAN | Mannose-6-phosphate isomerase OS=Homo sapiens OX=9606 GN=MPI PE=1 SV=2                                              |
| sp O43768 ENSA_HUMAN  | HUMAN | Alpha-endosulfine OS=Homo sapiens OX=9606 GN=ENSA PE=1 SV=1                                                         |
| sp P09417 DHPR_HUMAN  | HUMAN | Dihydropteridine reductase OS=Homo sapiens OX=9606 GN=QDPR PE=1 SV=2                                                |

|                       |       |                                                                                                                          |
|-----------------------|-------|--------------------------------------------------------------------------------------------------------------------------|
| sp Q96IU4 ABHEB_HUMAN | HUMAN | Protein ABHD14B OS=Homo sapiens OX=9606 GN=ABHD14B PE=1 SV=1                                                             |
| sp Q29RF7 PDS5A_HUMAN | HUMAN | Sister chromatid cohesion protein PDS5 homolog A OS=Homo sapiens OX=9606 GN=PDS5A PE=1 SV=1                              |
| sp O00170 AIP_HUMAN   | HUMAN | AH receptor-interacting protein OS=Homo sapiens OX=9606 GN=AIP PE=1 SV=2                                                 |
| sp O75569 PRKRA_HUMAN | HUMAN | Interferon-inducible double-stranded RNA-dependent protein kinase activator A OS=Homo sapiens OX=9606 GN=PRKRA PE=1 SV=1 |
| sp Q9Y2B0 CNPY2_HUMAN | HUMAN | Protein canopy homolog 2 OS=Homo sapiens OX=9606 GN=CNPY2 PE=1 SV=1                                                      |
| sp P62310 LSM3_HUMAN  | HUMAN | U6 snRNA-associated Sm-like protein LSM3 OS=Homo sapiens OX=9606 GN=LSM3 PE=1 SV=2                                       |
| sp O14579 COPE_HUMAN  | HUMAN | Coatomer subunit epsilon OS=Homo sapiens OX=9606 GN=COPE PE=1 SV=3                                                       |
| sp P51659 DHB4_HUMAN  | HUMAN | Peroxisomal multifunctional enzyme type 2 OS=Homo sapiens OX=9606 GN=HSD17B4 PE=1 SV=3                                   |
| sp P49642 PRI1_HUMAN  | HUMAN | DNA primase small subunit OS=Homo sapiens OX=9606 GN=PRIM1 PE=1 SV=1                                                     |
| sp Q96A72 MGN2_HUMAN  | HUMAN | Protein mago nashi homolog 2 OS=Homo sapiens OX=9606 GN=MAGOHB PE=1 SV=1                                                 |
| sp Q15404 RSU1_HUMAN  | HUMAN | Ras suppressor protein 1 OS=Homo sapiens OX=9606 GN=RSU1 PE=1 SV=3                                                       |
| sp Q8WWY3 PRP31_HUMAN | HUMAN | U4/U6 small nuclear ribonucleoprotein Prp31 OS=Homo sapiens OX=9606 GN=PRPF31 PE=1 SV=2                                  |
| sp Q9H3K6 BOLA2_HUMAN | HUMAN | Bola-like protein 2 OS=Homo sapiens OX=9606 GN=BOLA2 PE=1 SV=1                                                           |
| sp P62873 GBB1_HUMAN  | HUMAN | Guanine nucleotide-binding protein G(I)/G(S)/G(T) subunit beta-1 OS=Homo sapiens OX=9606 GN=GNB1 PE=1 SV=3               |
| sp Q52LJ0 FA98B_HUMAN | HUMAN | Protein FAM98B OS=Homo sapiens OX=9606 GN=FAM98B PE=1 SV=2                                                               |
| sp Q9UHD8 SEPT9_HUMAN | HUMAN | Septin-9 OS=Homo sapiens OX=9606 GN=SEPTIN9 PE=1 SV=2                                                                    |
| sp O75351 VPS4B_HUMAN | HUMAN | Vacuolar protein sorting-associated protein 4B OS=Homo sapiens OX=9606 GN=VPS4B PE=1 SV=2                                |
| sp P48556 PSMD8_HUMAN | HUMAN | 26S proteasome non-ATPase regulatory subunit 8 OS=Homo sapiens OX=9606 GN=PSMD8 PE=1 SV=2                                |
| sp P25325 THTM_HUMAN  | HUMAN | 3-mercaptopyruvate sulfurtransferase OS=Homo sapiens OX=9606 GN=MPST PE=1 SV=3                                           |
| sp P22059 OSBP1_HUMAN | HUMAN | Oxysterol-binding protein 1 OS=Homo sapiens OX=9606 GN=OSBP PE=1 SV=1                                                    |
| sp P11387 TOP1_HUMAN  | HUMAN | DNA topoisomerase 1 OS=Homo sapiens OX=9606 GN=TOP1 PE=1 SV=2                                                            |
| sp Q6JBY9 CPZIP_HUMAN | HUMAN | CapZ-interacting protein OS=Homo sapiens OX=9606 GN=RCSD1 PE=1 SV=1                                                      |
| sp Q08209 PP2BA_HUMAN | HUMAN | Serine/threonine-protein phosphatase 2B catalytic subunit alpha isoform OS=Homo sapiens OX=9606 GN=PPP3CA PE=1 SV=1      |
| sp Q13618 CUL3_HUMAN  | HUMAN | Cullin-3 OS=Homo sapiens OX=9606 GN=CUL3 PE=1 SV=2                                                                       |
| sp Q9NZZ3 CHMP5_HUMAN | HUMAN | Charged multivesicular body protein 5 OS=Homo sapiens OX=9606 GN=CHMP5 PE=1 SV=1                                         |
| sp P05771 KPCB_HUMAN  | HUMAN | Protein kinase C beta type OS=Homo sapiens OX=9606 GN=PRKCB PE=1 SV=4                                                    |
| sp Q15418 KS6A1_HUMAN | HUMAN | Ribosomal protein S6 kinase alpha-1 OS=Homo sapiens OX=9606 GN=RPS6KA1 PE=1 SV=2                                         |
| sp Q9H074 PAIP1_HUMAN | HUMAN | Polyadenylate-binding protein-interacting protein 1 OS=Homo sapiens OX=9606 GN=PAIP1 PE=1 SV=1                           |
| sp P06730 EIF4E_HUMAN | HUMAN | Eukaryotic translation initiation factor 4E OS=Homo sapiens OX=9606 GN=EIF4E PE=1 SV=2                                   |

|                       |       |                                                                                                                         |
|-----------------------|-------|-------------------------------------------------------------------------------------------------------------------------|
| sp O14974 MYPT1_HUMAN | HUMAN | Protein phosphatase 1 regulatory subunit 12A OS=Homo sapiens OX=9606 GN=PPP1R12A PE=1 SV=1                              |
| sp O60749 SNX2_HUMAN  | HUMAN | Sorting nexin-2 OS=Homo sapiens OX=9606 GN=SNX2 PE=1 SV=2                                                               |
| sp Q9P1F3 ABRAL_HUMAN | HUMAN | Costars family protein ABRACL OS=Homo sapiens OX=9606 GN=ABRACL PE=1 SV=1                                               |
| sp Q01415 GALK2_HUMAN | HUMAN | N-acetylgalactosamine kinase OS=Homo sapiens OX=9606 GN=GALK2 PE=1 SV=1                                                 |
| sp Q96CN7 ISOC1_HUMAN | HUMAN | Isochorismatase domain-containing protein 1 OS=Homo sapiens OX=9606 GN=ISOC1 PE=1 SV=3                                  |
| sp P46779 RL28_HUMAN  | HUMAN | 60S ribosomal protein L28 OS=Homo sapiens OX=9606 GN=RPL28 PE=1 SV=3                                                    |
| sp Q14155 ARHG7_HUMAN | HUMAN | Rho guanine nucleotide exchange factor 7 OS=Homo sapiens OX=9606 GN=ARHGEF7 PE=1 SV=2                                   |
| sp Q9UI30 TR112_HUMAN | HUMAN | Multifunctional methyltransferase subunit TRM112-like protein OS=Homo sapiens OX=9606 GN=TRMT112 PE=1 SV=1              |
| sp Q9H4E7 DEFI6_HUMAN | HUMAN | Differentially expressed in FDCP 6 homolog OS=Homo sapiens OX=9606 GN=DEF6 PE=1 SV=1                                    |
| sp P12270 TPR_HUMAN   | HUMAN | Nucleoprotein TPR OS=Homo sapiens OX=9606 GN=TPR PE=1 SV=3                                                              |
| sp Q9NX55 HYPK_HUMAN  | HUMAN | Huntingtin-interacting protein K OS=Homo sapiens OX=9606 GN=HYPK PE=1 SV=2                                              |
| sp Q9BY43 CHM4A_HUMAN | HUMAN | Charged multivesicular body protein 4a OS=Homo sapiens OX=9606 GN=CHMP4A PE=1 SV=3                                      |
| sp Q8N335 GPD1L_HUMAN | HUMAN | Glycerol-3-phosphate dehydrogenase 1-like protein OS=Homo sapiens OX=9606 GN=GPD1L PE=1 SV=1                            |
| sp O95834 EMAL2_HUMAN | HUMAN | Echinoderm microtubule-associated protein-like 2 OS=Homo sapiens OX=9606 GN=EML2 PE=1 SV=1                              |
| sp P55160 NCKPL_HUMAN | HUMAN | Nck-associated protein 1-like OS=Homo sapiens OX=9606 GN=NCKAP1L PE=1 SV=3                                              |
| sp P51610 HCFC1_HUMAN | HUMAN | Host cell factor 1 OS=Homo sapiens OX=9606 GN=HCFC1 PE=1 SV=2                                                           |
| sp P11388 TOP2A_HUMAN | HUMAN | DNA topoisomerase 2-alpha OS=Homo sapiens OX=9606 GN=TOP2A PE=1 SV=3                                                    |
| sp Q86U42 PABP2_HUMAN | HUMAN | Polyadenylate-binding protein 2 OS=Homo sapiens OX=9606 GN=PABPN1 PE=1 SV=3                                             |
| sp P41567 EIF1_HUMAN  | HUMAN | Eukaryotic translation initiation factor 1 OS=Homo sapiens OX=9606 GN=EIF1 PE=1 SV=1                                    |
| sp A6NDG6 PGP_HUMAN   | HUMAN | Glycerol-3-phosphate phosphatase OS=Homo sapiens OX=9606 GN=PGP PE=1 SV=1                                               |
| sp P02794 FRIH_HUMAN  | HUMAN | Ferritin heavy chain OS=Homo sapiens OX=9606 GN=FTH1 PE=1 SV=2                                                          |
| sp Q92734 TFG_HUMAN   | HUMAN | Protein TFG OS=Homo sapiens OX=9606 GN=TFG PE=1 SV=2                                                                    |
| sp Q96BS2 CHP3_HUMAN  | HUMAN | Calcineurin B homologous protein 3 OS=Homo sapiens OX=9606 GN=TESC PE=1 SV=3                                            |
| sp Q9BRT8 CBWD1_HUMAN | HUMAN | COBW domain-containing protein 1 OS=Homo sapiens OX=9606 GN=CBWD1 PE=2 SV=1                                             |
| sp P50897 PPT1_HUMAN  | HUMAN | Palmitoyl-protein thioesterase 1 OS=Homo sapiens OX=9606 GN=PPT1 PE=1 SV=1                                              |
| sp P48739 PIPNB_HUMAN | HUMAN | Phosphatidylinositol transfer protein beta isoform OS=Homo sapiens OX=9606 GN=PITPNB PE=1 SV=2                          |
| sp Q9NRN7 ADPPT_HUMAN | HUMAN | L-aminoadipate-semialdehyde dehydrogenase-phosphopantetheinyl transferase OS=Homo sapiens OX=9606 GN=AASDHPPT PE=1 SV=2 |
| sp P27824 CALX_HUMAN  | HUMAN | Calnexin OS=Homo sapiens OX=9606 GN=CANX PE=1 SV=2                                                                      |
| sp Q15645 PCH2_HUMAN  | HUMAN | Pachytene checkpoint protein 2 homolog OS=Homo sapiens OX=9606 GN=TRIP13 PE=1 SV=2                                      |
| sp Q9BVG4 PBDC1_HUMAN | HUMAN | Protein PBDC1 OS=Homo sapiens OX=9606 GN=PBDC1 PE=1 SV=1                                                                |

|                       |       |                                                                                                                      |
|-----------------------|-------|----------------------------------------------------------------------------------------------------------------------|
| sp O60341 KDM1A_HUMAN | HUMAN | Lysine-specific histone demethylase 1A OS=Homo sapiens OX=9606 GN=KDM1A PE=1 SV=2                                    |
| sp Q99661 KIF2C_HUMAN | HUMAN | Kinesin-like protein KIF2C OS=Homo sapiens OX=9606 GN=KIF2C PE=1 SV=2                                                |
| sp P04818 TYSY_HUMAN  | HUMAN | Thymidylate synthase OS=Homo sapiens OX=9606 GN=TYMS PE=1 SV=3                                                       |
| sp Q96RS6 NUDC1_HUMAN | HUMAN | NudC domain-containing protein 1 OS=Homo sapiens OX=9606 GN=NUDCD1 PE=1 SV=2                                         |
| sp Q9HCN4 GPN1_HUMAN  | HUMAN | GPN-loop GTPase 1 OS=Homo sapiens OX=9606 GN=GPN1 PE=1 SV=1                                                          |
| sp Q92538 GBF1_HUMAN  | HUMAN | Golgi-specific brefeldin A-resistance guanine nucleotide exchange factor 1 OS=Homo sapiens OX=9606 GN=GBF1 PE=1 SV=2 |
| sp P26373 RL13_HUMAN  | HUMAN | 60S ribosomal protein L13 OS=Homo sapiens OX=9606 GN=RPL13 PE=1 SV=4                                                 |
| sp Q8WXF1 PSPC1_HUMAN | HUMAN | Paraspeckle component 1 OS=Homo sapiens OX=9606 GN=PSPC1 PE=1 SV=1                                                   |
| sp Q9HAV7 GRPE1_HUMAN | HUMAN | GrpE protein homolog 1, mitochondrial OS=Homo sapiens OX=9606 GN=GRPEL1 PE=1 SV=2                                    |
| sp P11172 UMPS_HUMAN  | HUMAN | Uridine 5'-monophosphate synthase OS=Homo sapiens OX=9606 GN=UMPS PE=1 SV=1                                          |
| sp Q93008 USP9X_HUMAN | HUMAN | Probable ubiquitin carboxyl-terminal hydrolase FAF-X OS=Homo sapiens OX=9606 GN=USP9X PE=1 SV=3                      |
| sp Q96GG9 DCN1_HUMAN  | HUMAN | DCN1-like protein 1 OS=Homo sapiens OX=9606 GN=DCUN1D1 PE=1 SV=1                                                     |
| sp Q9UHB9 SRP68_HUMAN | HUMAN | Signal recognition particle subunit SRP68 OS=Homo sapiens OX=9606 GN=SRP68 PE=1 SV=2                                 |
| sp Q12972 PP1R8_HUMAN | HUMAN | Nuclear inhibitor of protein phosphatase 1 OS=Homo sapiens OX=9606 GN=PPP1R8 PE=1 SV=2                               |
| sp Q96PZ0 PUS7_HUMAN  | HUMAN | Pseudouridylate synthase 7 homolog OS=Homo sapiens OX=9606 GN=PUS7 PE=1 SV=2                                         |
| sp O00625 PIR_HUMAN   | HUMAN | Pirin OS=Homo sapiens OX=9606 GN=PIR PE=1 SV=1                                                                       |
| sp P30837 AL1B1_HUMAN | HUMAN | Aldehyde dehydrogenase X, mitochondrial OS=Homo sapiens OX=9606 GN=ALDH1B1 PE=1 SV=3                                 |
| sp O94776 MTA2_HUMAN  | HUMAN | Metastasis-associated protein MTA2 OS=Homo sapiens OX=9606 GN=MTA2 PE=1 SV=1                                         |
| sp P25705 ATPA_HUMAN  | HUMAN | ATP synthase subunit alpha, mitochondrial OS=Homo sapiens OX=9606 GN=ATP5F1A PE=1 SV=1                               |
| sp O95163 ELP1_HUMAN  | HUMAN | Elongator complex protein 1 OS=Homo sapiens OX=9606 GN=ELP1 PE=1 SV=3                                                |
| sp P78318 IGBP1_HUMAN | HUMAN | Immunoglobulin-binding protein 1 OS=Homo sapiens OX=9606 GN=IGBP1 PE=1 SV=1                                          |
| sp P61956 SUMO2_HUMAN | HUMAN | Small ubiquitin-related modifier 2 OS=Homo sapiens OX=9606 GN=SUMO2 PE=1 SV=3                                        |
| sp Q13247 SRSF6_HUMAN | HUMAN | Serine/arginine-rich splicing factor 6 OS=Homo sapiens OX=9606 GN=SRSF6 PE=1 SV=2                                    |
| sp P17931 LEG3_HUMAN  | HUMAN | Galectin-3 OS=Homo sapiens OX=9606 GN=LGALS3 PE=1 SV=5                                                               |
| sp P60891 PRPS1_HUMAN | HUMAN | Ribose-phosphate pyrophosphokinase 1 OS=Homo sapiens OX=9606 GN=PRPS1 PE=1 SV=2                                      |
| sp Q9BQ67 GRWD1_HUMAN | HUMAN | Glutamate-rich WD repeat-containing protein 1 OS=Homo sapiens OX=9606 GN=GRWD1 PE=1 SV=1                             |
| sp Q9BY44 EIF2A_HUMAN | HUMAN | Eukaryotic translation initiation factor 2A OS=Homo sapiens OX=9606 GN=EIF2A PE=1 SV=3                               |
| sp Q9H6Z4 RANB3_HUMAN | HUMAN | Ran-binding protein 3 OS=Homo sapiens OX=9606 GN=RANBP3 PE=1 SV=1                                                    |
| sp P51532 SMCA4_HUMAN | HUMAN | Transcription activator BRG1 OS=Homo sapiens OX=9606 GN=SMARCA4 PE=1 SV=2                                            |
| sp Q86X55 CARM1_HUMAN | HUMAN | Histone-arginine methyltransferase CARM1 OS=Homo sapiens OX=9606 GN=CARM1 PE=1 SV=3                                  |

|                       |       |                                                                                                              |
|-----------------------|-------|--------------------------------------------------------------------------------------------------------------|
| sp Q3KQV9 UAP1L_HUMAN | HUMAN | UDP-N-acetylhexosamine pyrophosphorylase-like protein 1 OS=Homo sapiens OX=9606 GN=UAP1L1 PE=1 SV=2          |
| sp Q9Y5P6 GMPPB_HUMAN | HUMAN | Mannose-1-phosphate guanyltransferase beta OS=Homo sapiens OX=9606 GN=GMPPB PE=1 SV=2                        |
| sp Q9Y4K1 CRBG1_HUMAN | HUMAN | Beta/gamma crystallin domain-containing protein 1 OS=Homo sapiens OX=9606 GN=CRYBG1 PE=1 SV=3                |
| sp Q9Y315 DEOC_HUMAN  | HUMAN | Deoxyribose-phosphate aldolase OS=Homo sapiens OX=9606 GN=DERA PE=1 SV=2                                     |
| sp P31942 HNRH3_HUMAN | HUMAN | Heterogeneous nuclear ribonucleoprotein H3 OS=Homo sapiens OX=9606 GN=HNRNPH3 PE=1 SV=2                      |
| sp Q9NVE7 PANK4_HUMAN | HUMAN | 4'-phosphopantetheine phosphatase OS=Homo sapiens OX=9606 GN=PANK4 PE=1 SV=1                                 |
| sp Q8TEQ6 GEMI5_HUMAN | HUMAN | Gem-associated protein 5 OS=Homo sapiens OX=9606 GN=GEMIN5 PE=1 SV=3                                         |
| sp P36405 ARL3_HUMAN  | HUMAN | ADP-ribosylation factor-like protein 3 OS=Homo sapiens OX=9606 GN=ARL3 PE=1 SV=2                             |
| sp Q9Y263 PLAP_HUMAN  | HUMAN | Phospholipase A-2-activating protein OS=Homo sapiens OX=9606 GN=PLAA PE=1 SV=2                               |
| sp Q9NVS9 PNPO_HUMAN  | HUMAN | Pyridoxine-5'-phosphate oxidase OS=Homo sapiens OX=9606 GN=PNPO PE=1 SV=1                                    |
| sp Q71DI3 H32_HUMAN   | HUMAN | Histone H3.2 OS=Homo sapiens OX=9606 GN=HIST2H3A PE=1 SV=3                                                   |
| sp Q9UBP6 TRMB_HUMAN  | HUMAN | tRNA (guanine-N(7)-)-methyltransferase OS=Homo sapiens OX=9606 GN=METTL1 PE=1 SV=1                           |
| sp Q9BRA2 TXD17_HUMAN | HUMAN | Thioredoxin domain-containing protein 17 OS=Homo sapiens OX=9606 GN=TXNDC17 PE=1 SV=1                        |
| sp Q4J6C6 PPCEL_HUMAN | HUMAN | Prolyl endopeptidase-like OS=Homo sapiens OX=9606 GN=PREPL PE=1 SV=1                                         |
| sp Q04323 UBXN1_HUMAN | HUMAN | UBX domain-containing protein 1 OS=Homo sapiens OX=9606 GN=UBXN1 PE=1 SV=2                                   |
| sp P61970 NTF2_HUMAN  | HUMAN | Nuclear transport factor 2 OS=Homo sapiens OX=9606 GN=NUTF2 PE=1 SV=1                                        |
| sp O60869 EDF1_HUMAN  | HUMAN | Endothelial differentiation-related factor 1 OS=Homo sapiens OX=9606 GN=EDF1 PE=1 SV=1                       |
| sp P62136 PP1A_HUMAN  | HUMAN | Serine/threonine-protein phosphatase PP1-alpha catalytic subunit OS=Homo sapiens OX=9606 GN=PPP1CA PE=1 SV=1 |
| sp O75044 SRGP2_HUMAN | HUMAN | SLIT-ROBO Rho GTPase-activating protein 2 OS=Homo sapiens OX=9606 GN=SRGAP2 PE=1 SV=3                        |
| sp Q13573 SNW1_HUMAN  | HUMAN | SNW domain-containing protein 1 OS=Homo sapiens OX=9606 GN=SNW1 PE=1 SV=1                                    |
| sp O95394 AGM1_HUMAN  | HUMAN | Phosphoacetylglucosamine mutase OS=Homo sapiens OX=9606 GN=PGM3 PE=1 SV=1                                    |
| sp Q9Y5Z4 HEBP2_HUMAN | HUMAN | Heme-binding protein 2 OS=Homo sapiens OX=9606 GN=HEBP2 PE=1 SV=1                                            |
| sp Q9UFN0 NPS3A_HUMAN | HUMAN | Protein NipSnap homolog 3A OS=Homo sapiens OX=9606 GN=NIPSNAP3A PE=1 SV=2                                    |
| sp Q96CT7 CC124_HUMAN | HUMAN | Coiled-coil domain-containing protein 124 OS=Homo sapiens OX=9606 GN=CCDC124 PE=1 SV=1                       |
| sp Q8WVJ2 NUDC2_HUMAN | HUMAN | NudC domain-containing protein 2 OS=Homo sapiens OX=9606 GN=NUDC2 PE=1 SV=1                                  |
| sp Q15067 ACOX1_HUMAN | HUMAN | Peroxisomal acyl-coenzyme A oxidase 1 OS=Homo sapiens OX=9606 GN=ACOX1 PE=1 SV=3                             |
| sp Q13568 IRF5_HUMAN  | HUMAN | Interferon regulatory factor 5 OS=Homo sapiens OX=9606 GN=IRF5 PE=1 SV=2                                     |
| sp P42226 STAT6_HUMAN | HUMAN | Signal transducer and activator of transcription 6 OS=Homo sapiens OX=9606 GN=STAT6 PE=1 SV=1                |
| sp O43670 ZN207_HUMAN | HUMAN | BUB3-interacting and GLEBS motif-containing protein ZNF207 OS=Homo sapiens OX=9606 GN=ZNF207 PE=1 SV=1       |

|                       |       |                                                                                                           |
|-----------------------|-------|-----------------------------------------------------------------------------------------------------------|
| sp Q16778 H2B2E_HUMAN | HUMAN | Histone H2B type 2-E OS=Homo sapiens OX=9606 GN=HIST2H2BE PE=1 SV=3                                       |
| sp Q13547 HDAC1_HUMAN | HUMAN | Histone deacetylase 1 OS=Homo sapiens OX=9606 GN=HDAC1 PE=1 SV=1                                          |
| sp P48668 K2C6C_HUMAN | HUMAN | Keratin, type II cytoskeletal 6C OS=Homo sapiens OX=9606 GN=KRT6C PE=1 SV=3                               |
| sp Q9BT73 PSMG3_HUMAN | HUMAN | Proteasome assembly chaperone 3 OS=Homo sapiens OX=9606 GN=PSMG3 PE=1 SV=1                                |
| sp P14174 MIF_HUMAN   | HUMAN | Macrophage migration inhibitory factor OS=Homo sapiens OX=9606 GN=MIF PE=1 SV=4                           |
| sp Q9Y508 RN114_HUMAN | HUMAN | E3 ubiquitin-protein ligase RNF114 OS=Homo sapiens OX=9606 GN=RNF114 PE=1 SV=1                            |
| sp Q9NUU7 DD19A_HUMAN | HUMAN | ATP-dependent RNA helicase DDX19A OS=Homo sapiens OX=9606 GN=DDX19A PE=1 SV=1                             |
| sp Q9NVM9 INT13_HUMAN | HUMAN | Integrator complex subunit 13 OS=Homo sapiens OX=9606 GN=INTS13 PE=1 SV=2                                 |
| sp Q9NPF4 OSGEP_HUMAN | HUMAN | Probable tRNA N6-adenosine threonylcarbamoyltransferase OS=Homo sapiens OX=9606 GN=OSGEP PE=1 SV=1        |
| sp Q9GZU8 PIP30_HUMAN | HUMAN | PSME3-interacting protein OS=Homo sapiens OX=9606 GN=PSME3IP1 PE=1 SV=1                                   |
| sp Q9BZE9 ASPC1_HUMAN | HUMAN | Tether containing UBX domain for GLUT4 OS=Homo sapiens OX=9606 GN=ASPC1 PE=1 SV=1                         |
| sp Q9BXP5 SRRT_HUMAN  | HUMAN | Serrate RNA effector molecule homolog OS=Homo sapiens OX=9606 GN=SRRT PE=1 SV=1                           |
| sp Q86UV5 UBP48_HUMAN | HUMAN | Ubiquitin carboxyl-terminal hydrolase 48 OS=Homo sapiens OX=9606 GN=USP48 PE=1 SV=1                       |
| sp Q15276 RABE1_HUMAN | HUMAN | Rab GTPase-binding effector protein 1 OS=Homo sapiens OX=9606 GN=RABEP1 PE=1 SV=2                         |
| sp Q15102 PA1B3_HUMAN | HUMAN | Platelet-activating factor acetylhydrolase IB subunit gamma OS=Homo sapiens OX=9606 GN=PAFAH1B3 PE=1 SV=1 |
| sp Q14320 FA50A_HUMAN | HUMAN | Protein FAM50A OS=Homo sapiens OX=9606 GN=FAM50A PE=1 SV=2                                                |
| sp P68402 PA1B2_HUMAN | HUMAN | Platelet-activating factor acetylhydrolase IB subunit beta OS=Homo sapiens OX=9606 GN=PAFAH1B2 PE=1 SV=1  |
| sp P63208 SKP1_HUMAN  | HUMAN | S-phase kinase-associated protein 1 OS=Homo sapiens OX=9606 GN=SKP1 PE=1 SV=2                             |
| sp P35244 RFA3_HUMAN  | HUMAN | Replication protein A 14 kDa subunit OS=Homo sapiens OX=9606 GN=RPA3 PE=1 SV=1                            |
| sp P15927 RFA2_HUMAN  | HUMAN | Replication protein A 32 kDa subunit OS=Homo sapiens OX=9606 GN=RPA2 PE=1 SV=1                            |
| sp O95232 LC7L3_HUMAN | HUMAN | Luc7-like protein 3 OS=Homo sapiens OX=9606 GN=LUC7L3 PE=1 SV=2                                           |
| sp O60216 RAD21_HUMAN | HUMAN | Double-strand-break repair protein rad21 homolog OS=Homo sapiens OX=9606 GN=RAD21 PE=1 SV=2               |
| sp O15347 HMGB3_HUMAN | HUMAN | High mobility group protein B3 OS=Homo sapiens OX=9606 GN=HMGB3 PE=1 SV=4                                 |
| sp Q9UBV8 PEF1_HUMAN  | HUMAN | Peflin OS=Homo sapiens OX=9606 GN=PEF1 PE=1 SV=1                                                          |
| sp Q9NQG5 RPR1B_HUMAN | HUMAN | Regulation of nuclear pre-mRNA domain-containing protein 1B OS=Homo sapiens OX=9606 GN=RPRD1B PE=1 SV=1   |
| sp Q9H993 ARMT1_HUMAN | HUMAN | Damage-control phosphatase ARMT1 OS=Homo sapiens OX=9606 GN=ARMT1 PE=1 SV=1                               |
| sp Q9H098 F107B_HUMAN | HUMAN | Protein FAM107B OS=Homo sapiens OX=9606 GN=FAM107B PE=1 SV=1                                              |
| sp Q9GZT3 SLIRP_HUMAN | HUMAN | SRA stem-loop-interacting RNA-binding protein, mitochondrial OS=Homo sapiens OX=9606 GN=SLIRP PE=1 SV=1   |

|                       |       |                                                                                                 |
|-----------------------|-------|-------------------------------------------------------------------------------------------------|
| sp Q9BZK7 TBL1R_HUMAN | HUMAN | F-box-like/WD repeat-containing protein TBL1XR1 OS=Homo sapiens OX=9606 GN=TBL1XR1 PE=1 SV=1    |
| sp Q9BTD8 RBM42_HUMAN | HUMAN | RNA-binding protein 42 OS=Homo sapiens OX=9606 GN=RBM42 PE=1 SV=1                               |
| sp Q9BQA1 MEP50_HUMAN | HUMAN | Methylosome protein 50 OS=Homo sapiens OX=9606 GN=WDR77 PE=1 SV=1                               |
| sp Q99417 MYCBP_HUMAN | HUMAN | c-Myc-binding protein OS=Homo sapiens OX=9606 GN=MYCBP PE=1 SV=3                                |
| sp Q96J01 THOC3_HUMAN | HUMAN | THO complex subunit 3 OS=Homo sapiens OX=9606 GN=THOC3 PE=1 SV=1                                |
| sp Q96G28 CFA36_HUMAN | HUMAN | Cilia- and flagella-associated protein 36 OS=Homo sapiens OX=9606 GN=CFAP36 PE=1 SV=2           |
| sp Q92522 H1X_HUMAN   | HUMAN | Histone H1x OS=Homo sapiens OX=9606 GN=H1FX PE=1 SV=1                                           |
| sp Q8WZA0 LZIC_HUMAN  | HUMAN | Protein LZIC OS=Homo sapiens OX=9606 GN=LZIC PE=1 SV=1                                          |
| sp Q8WU79 SMAP2_HUMAN | HUMAN | Stromal membrane-associated protein 2 OS=Homo sapiens OX=9606 GN=SMAP2 PE=1 SV=1                |
| sp Q8NFH3 NUP43_HUMAN | HUMAN | Nucleoporin Nup43 OS=Homo sapiens OX=9606 GN=NUP43 PE=1 SV=1                                    |
| sp Q8IU85 KCC1D_HUMAN | HUMAN | Calcium/calmodulin-dependent protein kinase type 1D OS=Homo sapiens OX=9606 GN=CAMK1D PE=1 SV=1 |
| sp Q4VC31 CCD58_HUMAN | HUMAN | Coiled-coil domain-containing protein 58 OS=Homo sapiens OX=9606 GN=CCDC58 PE=1 SV=1            |
| sp Q13501 SQSTM_HUMAN | HUMAN | Sequestosome-1 OS=Homo sapiens OX=9606 GN=SQSTM1 PE=1 SV=1                                      |
| sp Q07812 BAX_HUMAN   | HUMAN | Apoptosis regulator BAX OS=Homo sapiens OX=9606 GN=BAX PE=1 SV=1                                |
| sp Q01844 EWS_HUMAN   | HUMAN | RNA-binding protein EWS OS=Homo sapiens OX=9606 GN=EWSR1 PE=1 SV=1                              |
| sp Q01085 TIAR_HUMAN  | HUMAN | Nucleolysin TIAR OS=Homo sapiens OX=9606 GN=TIAL1 PE=1 SV=1                                     |
| sp P62837 UB2D2_HUMAN | HUMAN | Ubiquitin-conjugating enzyme E2 D2 OS=Homo sapiens OX=9606 GN=UBE2D2 PE=1 SV=1                  |
| sp P49458 SRP09_HUMAN | HUMAN | Signal recognition particle 9 kDa protein OS=Homo sapiens OX=9606 GN=SRP9 PE=1 SV=2             |
| sp P48507 GSH0_HUMAN  | HUMAN | Glutamate--cysteine ligase regulatory subunit OS=Homo sapiens OX=9606 GN=GCLM PE=1 SV=1         |
| sp P46379 BAG6_HUMAN  | HUMAN | Large proline-rich protein BAG6 OS=Homo sapiens OX=9606 GN=BAG6 PE=1 SV=2                       |
| sp P36639 8ODP_HUMAN  | HUMAN | 7,8-dihydro-8-oxoguanine triphosphatase OS=Homo sapiens OX=9606 GN=NUDT1 PE=1 SV=3              |
| sp P31949 S10AB_HUMAN | HUMAN | Protein S100-A11 OS=Homo sapiens OX=9606 GN=S100A11 PE=1 SV=2                                   |
| sp P31937 3HIDH_HUMAN | HUMAN | 3-hydroxyisobutyrate dehydrogenase, mitochondrial OS=Homo sapiens OX=9606 GN=HIBADH PE=1 SV=2   |
| sp P17096 HMGA1_HUMAN | HUMAN | High mobility group protein HMG-I/HMG-Y OS=Homo sapiens OX=9606 GN=HMGA1 PE=1 SV=3              |
| sp O75607 NPM3_HUMAN  | HUMAN | Nucleoplasmin-3 OS=Homo sapiens OX=9606 GN=NPM3 PE=1 SV=3                                       |
| sp O43681 ASNA_HUMAN  | HUMAN | ATPase ASNA1 OS=Homo sapiens OX=9606 GN=ASNA1 PE=1 SV=2                                         |
| sp O00267 SPT5H_HUMAN | HUMAN | Transcription elongation factor SPT5 OS=Homo sapiens OX=9606 GN=SUPT5H PE=1 SV=1                |
| sp Q96D71 REPS1_HUMAN | HUMAN | RalBP1-associated Eps domain-containing protein 1 OS=Homo sapiens OX=9606 GN=REPS1 PE=1 SV=3    |
| sp Q9UG63 ABCF2_HUMAN | HUMAN | ATP-binding cassette sub-family F member 2 OS=Homo sapiens OX=9606 GN=ABCF2 PE=1 SV=2           |
| sp Q15813 TBCE_HUMAN  | HUMAN | Tubulin-specific chaperone E OS=Homo sapiens OX=9606 GN=TBCE PE=1 SV=1                          |

|                        |       |                                                                                                                                                            |
|------------------------|-------|------------------------------------------------------------------------------------------------------------------------------------------------------------|
| sp Q9BXR0 TGT_HUMAN    | HUMAN | Queuine tRNA-ribosyltransferase catalytic subunit 1 OS=Homo sapiens OX=9606 GN=QTRT1 PE=1 SV=3                                                             |
| sp Q13595 TRA2A_HUMAN  | HUMAN | Transformer-2 protein homolog alpha OS=Homo sapiens OX=9606 GN=TRA2A PE=1 SV=1                                                                             |
| sp P50579 MAP2_HUMAN   | HUMAN | Methionine aminopeptidase 2 OS=Homo sapiens OX=9606 GN=METAP2 PE=1 SV=1                                                                                    |
| sp Q96KB5 TOPK_HUMAN   | HUMAN | Lymphokine-activated killer T-cell-originated protein kinase OS=Homo sapiens OX=9606 GN=PBK PE=1 SV=3                                                      |
| sp Q92530 PSMF1_HUMAN  | HUMAN | Proteasome inhibitor PI31 subunit OS=Homo sapiens OX=9606 GN=PSMF1 PE=1 SV=2                                                                               |
| sp Q9H6T3 RPAP3_HUMAN  | HUMAN | RNA polymerase II-associated protein 3 OS=Homo sapiens OX=9606 GN=RPAP3 PE=1 SV=2                                                                          |
| sp P22307 NLTP_HUMAN   | HUMAN | Non-specific lipid-transfer protein OS=Homo sapiens OX=9606 GN=SCP2 PE=1 SV=2                                                                              |
| sp Q15785 TOM34_HUMAN  | HUMAN | Mitochondrial import receptor subunit TOM34 OS=Homo sapiens OX=9606 GN=TOMM34 PE=1 SV=2                                                                    |
| sp Q15369 ELOC_HUMAN   | HUMAN | Elongin-C OS=Homo sapiens OX=9606 GN=ELOC PE=1 SV=1                                                                                                        |
| sp O43516 WIPF1_HUMAN  | HUMAN | WAS/WASL-interacting protein family member 1 OS=Homo sapiens OX=9606 GN=WIPF1 PE=1 SV=3                                                                    |
| sp P15498 VAV_HUMAN    | HUMAN | Proto-oncogene vav OS=Homo sapiens OX=9606 GN=VAV1 PE=1 SV=4                                                                                               |
| sp Q99436 PSB7_HUMAN   | HUMAN | Proteasome subunit beta type-7 OS=Homo sapiens OX=9606 GN=PSMB7 PE=1 SV=1                                                                                  |
| sp Q9NZJ9 NUDT4_HUMAN  | HUMAN | Diphosphoinositol polyphosphate phosphohydrolase 2 OS=Homo sapiens OX=9606 GN=NUDT4 PE=1 SV=2                                                              |
| sp P37198 NUP62_HUMAN  | HUMAN | Nuclear pore glycoprotein p62 OS=Homo sapiens OX=9606 GN=NUP62 PE=1 SV=3                                                                                   |
| sp P36957 ODO2_HUMAN   | HUMAN | Dihydrolipoyllysine-residue succinyltransferase component of 2-oxoglutarate dehydrogenase complex, mitochondrial OS=Homo sapiens OX=9606 GN=DLST PE=1 SV=4 |
| sp P23469 PTPRE_HUMAN  | HUMAN | Receptor-type tyrosine-protein phosphatase epsilon OS=Homo sapiens OX=9606 GN=PTPRE PE=1 SV=1                                                              |
| sp Q9NP77 SSU72_HUMAN  | HUMAN | RNA polymerase II subunit A C-terminal domain phosphatase SSU72 OS=Homo sapiens OX=9606 GN=SSU72 PE=1 SV=1                                                 |
| sp O43665 RGS10_HUMAN  | HUMAN | Regulator of G-protein signaling 10 OS=Homo sapiens OX=9606 GN=RGS10 PE=1 SV=3                                                                             |
| sp Q9UI12 VATH_HUMAN   | HUMAN | V-type proton ATPase subunit H OS=Homo sapiens OX=9606 GN=ATP6V1H PE=1 SV=1                                                                                |
| sp Q86UA1 PRP39_HUMAN  | HUMAN | Pre-mRNA-processing factor 39 OS=Homo sapiens OX=9606 GN=PRPF39 PE=1 SV=3                                                                                  |
| sp Q96AG4 LRC59_HUMAN  | HUMAN | Leucine-rich repeat-containing protein 59 OS=Homo sapiens OX=9606 GN=LRRC59 PE=1 SV=1                                                                      |
| sp Q9UBW8 CSN7A_HUMAN  | HUMAN | COP9 signalosome complex subunit 7a OS=Homo sapiens OX=9606 GN=COPS7A PE=1 SV=1                                                                            |
| sp Q9Y4Z0 LSM4_HUMAN   | HUMAN | U6 snRNA-associated Sm-like protein LSM4 OS=Homo sapiens OX=9606 GN=LSM4 PE=1 SV=1                                                                         |
| sp Q92804 RBP56_HUMAN  | HUMAN | TATA-binding protein-associated factor 2N OS=Homo sapiens OX=9606 GN=TAF15 PE=1 SV=1                                                                       |
| sp Q8NBF2 NHLRC2_HUMAN | HUMAN | NHL repeat-containing protein 2 OS=Homo sapiens OX=9606 GN=NHLRC2 PE=1 SV=1                                                                                |
| sp Q6IA69 NADE_HUMAN   | HUMAN | Glutamine-dependent NAD(+) synthetase OS=Homo sapiens OX=9606 GN=NADSYN1 PE=1 SV=3                                                                         |
| sp O95571 ETHE1_HUMAN  | HUMAN | Persulfide dioxygenase ETHE1, mitochondrial OS=Homo sapiens OX=9606 GN=ETHE1 PE=1 SV=2                                                                     |
| sp Q9Y316 MEMO1_HUMAN  | HUMAN | Protein MEMO1 OS=Homo sapiens OX=9606 GN=MEMO1 PE=1 SV=1                                                                                                   |
| sp P42766 RL35_HUMAN   | HUMAN | 60S ribosomal protein L35 OS=Homo sapiens OX=9606 GN=RPL35 PE=1 SV=2                                                                                       |

|                       |       |                                                                                                                    |
|-----------------------|-------|--------------------------------------------------------------------------------------------------------------------|
| sp Q14978 NOLC1_HUMAN | HUMAN | Nucleolar and coiled-body phosphoprotein 1 OS=Homo sapiens OX=9606 GN=NOLC1 PE=1 SV=2                              |
| sp P28340 DPOD1_HUMAN | HUMAN | DNA polymerase delta catalytic subunit OS=Homo sapiens OX=9606 GN=POLD1 PE=1 SV=2                                  |
| sp Q14790 CASP8_HUMAN | HUMAN | Caspase-8 OS=Homo sapiens OX=9606 GN=CASP8 PE=1 SV=1                                                               |
| sp Q9NSE4 SYIM_HUMAN  | HUMAN | Isoleucine--tRNA ligase, mitochondrial OS=Homo sapiens OX=9606 GN=IARS2 PE=1 SV=2                                  |
| sp P32320 CDD_HUMAN   | HUMAN | Cytidine deaminase OS=Homo sapiens OX=9606 GN=CDA PE=1 SV=2                                                        |
| sp Q9Y6M1 IF2B2_HUMAN | HUMAN | Insulin-like growth factor 2 mRNA-binding protein 2 OS=Homo sapiens OX=9606 GN=IGF2BP2 PE=1 SV=2                   |
| sp Q14116 IL18_HUMAN  | HUMAN | Interleukin-18 OS=Homo sapiens OX=9606 GN=IL18 PE=1 SV=1                                                           |
| sp Q04864 REL_HUMAN   | HUMAN | Proto-oncogene c-Rel OS=Homo sapiens OX=9606 GN=REL PE=1 SV=1                                                      |
| sp O60763 USO1_HUMAN  | HUMAN | General vesicular transport factor p115 OS=Homo sapiens OX=9606 GN=USO1 PE=1 SV=2                                  |
| sp P11177 ODPB_HUMAN  | HUMAN | Pyruvate dehydrogenase E1 component subunit beta, mitochondrial OS=Homo sapiens OX=9606 GN=PDHB PE=1 SV=3          |
| sp P04843 RPN1_HUMAN  | HUMAN | Dolichyl-diphosphooligosaccharide--protein glycosyltransferase subunit 1 OS=Homo sapiens OX=9606 GN=RPN1 PE=1 SV=1 |
| sp Q05655 KPCD_HUMAN  | HUMAN | Protein kinase C delta type OS=Homo sapiens OX=9606 GN=PRKCD PE=1 SV=2                                             |
| sp Q9NRF9 DPOE3_HUMAN | HUMAN | DNA polymerase epsilon subunit 3 OS=Homo sapiens OX=9606 GN=POLE3 PE=1 SV=1                                        |
| sp O43617 TPPC3_HUMAN | HUMAN | Trafficking protein particle complex subunit 3 OS=Homo sapiens OX=9606 GN=TRAPPC3 PE=1 SV=1                        |
| sp Q8IYB5 SMAP1_HUMAN | HUMAN | Stromal membrane-associated protein 1 OS=Homo sapiens OX=9606 GN=SMAP1 PE=1 SV=2                                   |
| sp P24158 PRTN3_HUMAN | HUMAN | Myeloblastin OS=Homo sapiens OX=9606 GN=PRTN3 PE=1 SV=3                                                            |
| sp P25685 DNJB1_HUMAN | HUMAN | DnaJ homolog subfamily B member 1 OS=Homo sapiens OX=9606 GN=DNAJB1 PE=1 SV=4                                      |
| sp Q09161 NCBP1_HUMAN | HUMAN | Nuclear cap-binding protein subunit 1 OS=Homo sapiens OX=9606 GN=NCBP1 PE=1 SV=1                                   |
| sp Q14696 MESD_HUMAN  | HUMAN | LRP chaperone MESD OS=Homo sapiens OX=9606 GN=MESD PE=1 SV=2                                                       |
| sp P82979 SARNP_HUMAN | HUMAN | SAP domain-containing ribonucleoprotein OS=Homo sapiens OX=9606 GN=SARNP PE=1 SV=3                                 |
| sp Q8WWM7 ATX2L_HUMAN | HUMAN | Ataxin-2-like protein OS=Homo sapiens OX=9606 GN=ATXN2L PE=1 SV=2                                                  |
| sp Q15436 SC23A_HUMAN | HUMAN | Protein transport protein Sec23A OS=Homo sapiens OX=9606 GN=SEC23A PE=1 SV=2                                       |
| sp P31150 GDIA_HUMAN  | HUMAN | Rab GDP dissociation inhibitor alpha OS=Homo sapiens OX=9606 GN=GDI1 PE=1 SV=2                                     |
| sp Q8NB5 GT251_HUMAN  | HUMAN | Procollagen galactosyltransferase 1 OS=Homo sapiens OX=9606 GN=COLGALT1 PE=1 SV=1                                  |
| sp P61313 RL15_HUMAN  | HUMAN | 60S ribosomal protein L15 OS=Homo sapiens OX=9606 GN=RPL15 PE=1 SV=2                                               |
| sp P63167 DYL1_HUMAN  | HUMAN | Dynein light chain 1, cytoplasmic OS=Homo sapiens OX=9606 GN=DYNLL1 PE=1 SV=1                                      |
| sp Q9UBS4 DJB11_HUMAN | HUMAN | DnaJ homolog subfamily B member 11 OS=Homo sapiens OX=9606 GN=DNAJB11 PE=1 SV=1                                    |
| sp Q9NRX4 PHP14_HUMAN | HUMAN | 14 kDa phosphohistidine phosphatase OS=Homo sapiens OX=9606 GN=PHPT1 PE=1 SV=1                                     |
| sp Q15428 SF3A2_HUMAN | HUMAN | Splicing factor 3A subunit 2 OS=Homo sapiens OX=9606 GN=SF3A2 PE=1 SV=2                                            |
| sp O75792 RNH2A_HUMAN | HUMAN | Ribonuclease H2 subunit A OS=Homo sapiens OX=9606 GN=RNASEH2A PE=1 SV=2                                            |

|                       |       |                                                                                                        |
|-----------------------|-------|--------------------------------------------------------------------------------------------------------|
| sp Q9UNE7 CHIP_HUMAN  | HUMAN | E3 ubiquitin-protein ligase CHIP OS=Homo sapiens OX=9606 GN=STUB1 PE=1 SV=2                            |
| sp P07858 CATB_HUMAN  | HUMAN | Cathepsin B OS=Homo sapiens OX=9606 GN=CTSB PE=1 SV=3                                                  |
| sp O60784 TOM1_HUMAN  | HUMAN | Target of Myb protein 1 OS=Homo sapiens OX=9606 GN=TOM1 PE=1 SV=2                                      |
| sp P62834 RAP1A_HUMAN | HUMAN | Ras-related protein Rap-1A OS=Homo sapiens OX=9606 GN=RAP1A PE=1 SV=1                                  |
| sp P53634 CATC_HUMAN  | HUMAN | Dipeptidyl peptidase 1 OS=Homo sapiens OX=9606 GN=CTSC PE=1 SV=2                                       |
| sp Q8N3C0 ASCC3_HUMAN | HUMAN | Activating signal cointegrator 1 complex subunit 3 OS=Homo sapiens OX=9606 GN=ASCC3 PE=1 SV=3          |
| sp Q9UNN5 FAF1_HUMAN  | HUMAN | FAS-associated factor 1 OS=Homo sapiens OX=9606 GN=FAF1 PE=1 SV=2                                      |
| sp P54886 P5CS_HUMAN  | HUMAN | Delta-1-pyrroline-5-carboxylate synthase OS=Homo sapiens OX=9606 GN=ALDH18A1 PE=1 SV=2                 |
| sp Q13363 CTBP1_HUMAN | HUMAN | C-terminal-binding protein 1 OS=Homo sapiens OX=9606 GN=CTBP1 PE=1 SV=2                                |
| sp Q9NXH9 TRM1_HUMAN  | HUMAN | tRNA (guanine(26)-N(2))-dimethyltransferase OS=Homo sapiens OX=9606 GN=TRMT1 PE=1 SV=1                 |
| sp P40818 UBP8_HUMAN  | HUMAN | Ubiquitin carboxyl-terminal hydrolase 8 OS=Homo sapiens OX=9606 GN=USP8 PE=1 SV=1                      |
| sp Q9UNP9 PPIE_HUMAN  | HUMAN | Peptidyl-prolyl cis-trans isomerase E OS=Homo sapiens OX=9606 GN=PPIE PE=1 SV=1                        |
| sp O15027 SC16A_HUMAN | HUMAN | Protein transport protein Sec16A OS=Homo sapiens OX=9606 GN=SEC16A PE=1 SV=4                           |
| sp Q99615 DNJC7_HUMAN | HUMAN | DnaJ homolog subfamily C member 7 OS=Homo sapiens OX=9606 GN=DNAJC7 PE=1 SV=2                          |
| sp Q96GX9 MTNB_HUMAN  | HUMAN | Methylthioribulose-1-phosphate dehydratase OS=Homo sapiens OX=9606 GN=APIP PE=1 SV=1                   |
| sp O43809 CPSF5_HUMAN | HUMAN | Cleavage and polyadenylation specificity factor subunit 5 OS=Homo sapiens OX=9606 GN=NUDT21 PE=1 SV=1  |
| sp O00764 PDXK_HUMAN  | HUMAN | Pyridoxal kinase OS=Homo sapiens OX=9606 GN=PDXK PE=1 SV=1                                             |
| sp Q8IYB3 SRRM1_HUMAN | HUMAN | Serine/arginine repetitive matrix protein 1 OS=Homo sapiens OX=9606 GN=SRRM1 PE=1 SV=2                 |
| sp O43865 SAHH2_HUMAN | HUMAN | S-adenosylhomocysteine hydrolase-like protein 1 OS=Homo sapiens OX=9606 GN=AHCYL1 PE=1 SV=2            |
| sp P09012 SNRPA_HUMAN | HUMAN | U1 small nuclear ribonucleoprotein A OS=Homo sapiens OX=9606 GN=SNRPA PE=1 SV=3                        |
| sp Q02750 MP2K1_HUMAN | HUMAN | Dual specificity mitogen-activated protein kinase kinase 1 OS=Homo sapiens OX=9606 GN=MAP2K1 PE=1 SV=2 |
| sp Q53GS9 SNUT2_HUMAN | HUMAN | U4/U6.U5 tri-snRNP-associated protein 2 OS=Homo sapiens OX=9606 GN=USP39 PE=1 SV=2                     |
| sp O94855 SC24D_HUMAN | HUMAN | Protein transport protein Sec24D OS=Homo sapiens OX=9606 GN=SEC24D PE=1 SV=2                           |
| sp B0I1T2 MYO1G_HUMAN | HUMAN | Unconventional myosin-Ig OS=Homo sapiens OX=9606 GN=MYO1G PE=1 SV=2                                    |
| sp P50213 IDH3A_HUMAN | HUMAN | Isocitrate dehydrogenase [NAD] subunit alpha, mitochondrial OS=Homo sapiens OX=9606 GN=IDH3A PE=1 SV=1 |
| sp Q969U7 PSMG2_HUMAN | HUMAN | Proteasome assembly chaperone 2 OS=Homo sapiens OX=9606 GN=PSMG2 PE=1 SV=1                             |
| sp P10253 LYAG_HUMAN  | HUMAN | Lysosomal alpha-glucosidase OS=Homo sapiens OX=9606 GN=GAA PE=1 SV=4                                   |
| sp P60510 PP4C_HUMAN  | HUMAN | Serine/threonine-protein phosphatase 4 catalytic subunit OS=Homo sapiens OX=9606 GN=PPP4C PE=1 SV=1    |

|                        |       |                                                                                                        |
|------------------------|-------|--------------------------------------------------------------------------------------------------------|
| sp P55735 SEC13_HUMAN  | HUMAN | Protein SEC13 homolog OS=Homo sapiens OX=9606 GN=SEC13 PE=1 SV=3                                       |
| sp P19838 NFKB1_HUMAN  | HUMAN | Nuclear factor NF-kappa-B p105 subunit OS=Homo sapiens OX=9606 GN=NFKB1 PE=1 SV=2                      |
| sp Q7Z5L9 I2BP2_HUMAN  | HUMAN | Interferon regulatory factor 2-binding protein 2 OS=Homo sapiens OX=9606 GN=IRF2BP2 PE=1 SV=2          |
| sp Q9BX55 AP1M1_HUMAN  | HUMAN | AP-1 complex subunit mu-1 OS=Homo sapiens OX=9606 GN=AP1M1 PE=1 SV=3                                   |
| sp P53992 SC24C_HUMAN  | HUMAN | Protein transport protein Sec24C OS=Homo sapiens OX=9606 GN=SEC24C PE=1 SV=3                           |
| sp Q9NUJ1 ABHDA_HUMAN  | HUMAN | Mycophenolic acid acyl-glucuronide esterase, mitochondrial OS=Homo sapiens OX=9606 GN=ABHD10 PE=1 SV=1 |
| sp Q9BUQ8 DDX23_HUMAN  | HUMAN | Probable ATP-dependent RNA helicase DDX23 OS=Homo sapiens OX=9606 GN=DDX23 PE=1 SV=3                   |
| sp Q13144 EIF2BE_HUMAN | HUMAN | Translation initiation factor eIF-2B subunit epsilon OS=Homo sapiens OX=9606 GN=EIF2B5 PE=1 SV=3       |
| sp P61106 RAB14_HUMAN  | HUMAN | Ras-related protein Rab-14 OS=Homo sapiens OX=9606 GN=RAB14 PE=1 SV=4                                  |
| sp P83731 RL24_HUMAN   | HUMAN | 60S ribosomal protein L24 OS=Homo sapiens OX=9606 GN=RPL24 PE=1 SV=1                                   |
| sp Q9Y333 LSM2_HUMAN   | HUMAN | U6 snRNA-associated Sm-like protein LSm2 OS=Homo sapiens OX=9606 GN=LSM2 PE=1 SV=1                     |
| sp Q9Y3C4 TPRKB_HUMAN  | HUMAN | EKC/KEOPS complex subunit TPRKB OS=Homo sapiens OX=9606 GN=TPRKB PE=1 SV=1                             |
| sp Q15126 PMVK_HUMAN   | HUMAN | Phosphomevalonate kinase OS=Homo sapiens OX=9606 GN=PMVK PE=1 SV=3                                     |
| sp Q06787 FMR1_HUMAN   | HUMAN | Synaptic functional regulator FMR1 OS=Homo sapiens OX=9606 GN=FMR1 PE=1 SV=1                           |
| sp A0AVT1 UBA6_HUMAN   | HUMAN | Ubiquitin-like modifier-activating enzyme 6 OS=Homo sapiens OX=9606 GN=UBA6 PE=1 SV=1                  |
| sp Q13464 ROCK1_HUMAN  | HUMAN | Rho-associated protein kinase 1 OS=Homo sapiens OX=9606 GN=ROCK1 PE=1 SV=1                             |
| sp Q9P2E9 RRBP1_HUMAN  | HUMAN | Ribosome-binding protein 1 OS=Homo sapiens OX=9606 GN=RRBP1 PE=1 SV=5                                  |
| sp Q8WUA2 PPIL4_HUMAN  | HUMAN | Peptidyl-prolyl cis-trans isomerase-like 4 OS=Homo sapiens OX=9606 GN=PPIL4 PE=1 SV=1                  |
| sp O95239 KIF4A_HUMAN  | HUMAN | Chromosome-associated kinesin KIF4A OS=Homo sapiens OX=9606 GN=KIF4A PE=1 SV=3                         |
| sp Q92974 ARHG2_HUMAN  | HUMAN | Rho guanine nucleotide exchange factor 2 OS=Homo sapiens OX=9606 GN=ARHGEF2 PE=1 SV=4                  |
| sp Q6L8Q7 PDE12_HUMAN  | HUMAN | 2',5'-phosphodiesterase 12 OS=Homo sapiens OX=9606 GN=PDE12 PE=1 SV=2                                  |
| sp Q15370 ELOB_HUMAN   | HUMAN | Elongin-B OS=Homo sapiens OX=9606 GN=ELOB PE=1 SV=1                                                    |
| sp P62851 RS25_HUMAN   | HUMAN | 40S ribosomal protein S25 OS=Homo sapiens OX=9606 GN=RPS25 PE=1 SV=1                                   |
| sp O60493 SNX3_HUMAN   | HUMAN | Sorting nexin-3 OS=Homo sapiens OX=9606 GN=SNX3 PE=1 SV=3                                              |
| sp Q9BVK6 TMED9_HUMAN  | HUMAN | Transmembrane emp24 domain-containing protein 9 OS=Homo sapiens OX=9606 GN=TMED9 PE=1 SV=2             |
| sp Q71UM5 RS27L_HUMAN  | HUMAN | 40S ribosomal protein S27-like OS=Homo sapiens OX=9606 GN=RPS27L PE=1 SV=3                             |
| sp P40763 STAT3_HUMAN  | HUMAN | Signal transducer and activator of transcription 3 OS=Homo sapiens OX=9606 GN=STAT3 PE=1 SV=2          |
| sp Q9UJY4 GGA2_HUMAN   | HUMAN | ADP-ribosylation factor-binding protein GGA2 OS=Homo sapiens OX=9606 GN=GGA2 PE=1 SV=3                 |
| sp P55265 DSRAD_HUMAN  | HUMAN | Double-stranded RNA-specific adenosine deaminase OS=Homo sapiens OX=9606 GN=ADAR PE=1 SV=4             |
| sp Q9H307 PININ_HUMAN  | HUMAN | Pinin OS=Homo sapiens OX=9606 GN=PNN PE=1 SV=5                                                         |

|                        |       |                                                                                                        |
|------------------------|-------|--------------------------------------------------------------------------------------------------------|
| sp P49366 DHYS_HUMAN   | HUMAN | Deoxyhypusine synthase OS=Homo sapiens OX=9606 GN=DHPS PE=1 SV=1                                       |
| sp Q92922 SMRC1_HUMAN  | HUMAN | SWI/SNF complex subunit SMARCC1 OS=Homo sapiens OX=9606 GN=SMARCC1 PE=1 SV=3                           |
| sp Q9UPT8 ZC3H4_HUMAN  | HUMAN | Zinc finger CCCH domain-containing protein 4 OS=Homo sapiens OX=9606 GN=ZC3H4 PE=1 SV=3                |
| sp Q9H8W4 PKHF2_HUMAN  | HUMAN | Pleckstrin homology domain-containing family F member 2 OS=Homo sapiens OX=9606 GN=PLEKHF2 PE=1 SV=1   |
| sp P61962 DCAF7_HUMAN  | HUMAN | DDB1- and CUL4-associated factor 7 OS=Homo sapiens OX=9606 GN=DCAF7 PE=1 SV=1                          |
| sp P0DP25 CALM3_HUMAN  | HUMAN | Calmodulin-3 OS=Homo sapiens OX=9606 GN=CALM3 PE=1 SV=1                                                |
| sp P46778 RL21_HUMAN   | HUMAN | 60S ribosomal protein L21 OS=Homo sapiens OX=9606 GN=RPL21 PE=1 SV=2                                   |
| sp Q8NBT2 SPC24_HUMAN  | HUMAN | Kinetochore protein Spc24 OS=Homo sapiens OX=9606 GN=SPC24 PE=1 SV=2                                   |
| sp Q9BS26 ERP44_HUMAN  | HUMAN | Endoplasmic reticulum resident protein 44 OS=Homo sapiens OX=9606 GN=ERP44 PE=1 SV=1                   |
| sp Q8N6M0 OTUD6B_HUMAN | HUMAN | Deubiquitinase OTUD6B OS=Homo sapiens OX=9606 GN=OTUD6B PE=1 SV=1                                      |
| sp Q86VP1 TAXB1_HUMAN  | HUMAN | Tax1-binding protein 1 OS=Homo sapiens OX=9606 GN=TAX1BP1 PE=1 SV=2                                    |
| sp Q8IZP0 ABI1_HUMAN   | HUMAN | Abl interactor 1 OS=Homo sapiens OX=9606 GN=ABI1 PE=1 SV=4                                             |
| sp O14979 HNRDL_HUMAN  | HUMAN | Heterogeneous nuclear ribonucleoprotein D-like OS=Homo sapiens OX=9606 GN=HNRNPDL PE=1 SV=3            |
| sp O95154 ARK73_HUMAN  | HUMAN | Aflatoxin B1 aldehyde reductase member 3 OS=Homo sapiens OX=9606 GN=AKR7A3 PE=1 SV=2                   |
| sp P49207 RL34_HUMAN   | HUMAN | 60S ribosomal protein L34 OS=Homo sapiens OX=9606 GN=RPL34 PE=1 SV=3                                   |
| sp P49407 ARRB1_HUMAN  | HUMAN | Beta-arrestin-1 OS=Homo sapiens OX=9606 GN=ARRB1 PE=1 SV=2                                             |
| sp Q6UX04 CWC27_HUMAN  | HUMAN | Spliceosome-associated protein CWC27 homolog OS=Homo sapiens OX=9606 GN=CWC27 PE=1 SV=1                |
| sp O60678 ANM3_HUMAN   | HUMAN | Protein arginine N-methyltransferase 3 OS=Homo sapiens OX=9606 GN=PRMT3 PE=1 SV=4                      |
| sp Q1KMD3 HNRL2_HUMAN  | HUMAN | Heterogeneous nuclear ribonucleoprotein U-like protein 2 OS=Homo sapiens OX=9606 GN=HNRNPUL2 PE=1 SV=1 |
| sp Q9Y3D0 CIA2B_HUMAN  | HUMAN | Cytosolic iron-sulfur assembly component 2B OS=Homo sapiens OX=9606 GN= CIAO2B PE=1 SV=1               |
| sp Q86UP2 KTN1_HUMAN   | HUMAN | Kinectin OS=Homo sapiens OX=9606 GN=KTN1 PE=1 SV=1                                                     |
| sp O75592 MYCB2_HUMAN  | HUMAN | E3 ubiquitin-protein ligase MYCBP2 OS=Homo sapiens OX=9606 GN=MYCBP2 PE=1 SV=4                         |
| sp O15397 IPO8_HUMAN   | HUMAN | Importin-8 OS=Homo sapiens OX=9606 GN=IPO8 PE=1 SV=2                                                   |
| sp P35613 BASI_HUMAN   | HUMAN | Basigin OS=Homo sapiens OX=9606 GN=BSG PE=1 SV=2                                                       |
| sp P30876 RPB2_HUMAN   | HUMAN | DNA-directed RNA polymerase II subunit RPB2 OS=Homo sapiens OX=9606 GN=POLR2B PE=1 SV=1                |
| sp P29466 CASP1_HUMAN  | HUMAN | Caspase-1 OS=Homo sapiens OX=9606 GN=CASP1 PE=1 SV=1                                                   |
| sp Q9NY12 GAR1_HUMAN   | HUMAN | H/ACA ribonucleoprotein complex subunit 1 OS=Homo sapiens OX=9606 GN=GAR1 PE=1 SV=1                    |
| sp P52434 RPAB3_HUMAN  | HUMAN | DNA-directed RNA polymerases I, II, and III subunit RPABC3 OS=Homo sapiens OX=9606 GN=POLR2H PE=1 SV=4 |

|                       |       |                                                                                                                         |
|-----------------------|-------|-------------------------------------------------------------------------------------------------------------------------|
| sp Q9P0L0 VAPA_HUMAN  | HUMAN | Vesicle-associated membrane protein-associated protein A OS=Homo sapiens OX=9606 GN=VAPA PE=1 SV=3                      |
| sp Q8IUD2 RB6I2_HUMAN | HUMAN | ELKS/Rab6-interacting/CAST family member 1 OS=Homo sapiens OX=9606 GN=ERC1 PE=1 SV=1                                    |
| sp P41218 MNDA_HUMAN  | HUMAN | Myeloid cell nuclear differentiation antigen OS=Homo sapiens OX=9606 GN=MNDA PE=1 SV=1                                  |
| sp Q5T4S7 UBR4_HUMAN  | HUMAN | E3 ubiquitin-protein ligase UBR4 OS=Homo sapiens OX=9606 GN=UBR4 PE=1 SV=1                                              |
| sp P19174 PLCG1_HUMAN | HUMAN | 1-phosphatidylinositol 4,5-bisphosphate phosphodiesterase gamma-1 OS=Homo sapiens OX=9606 GN=PLCG1 PE=1 SV=1            |
| sp P46108 CRK_HUMAN   | HUMAN | Adapter molecule crk OS=Homo sapiens OX=9606 GN=CRK PE=1 SV=2                                                           |
| sp Q15149 PLEC_HUMAN  | HUMAN | Plectin OS=Homo sapiens OX=9606 GN=PLEC PE=1 SV=3                                                                       |
| sp Q9UJ68 MSRA_HUMAN  | HUMAN | Mitochondrial peptide methionine sulfoxide reductase OS=Homo sapiens OX=9606 GN=MSRA PE=1 SV=1                          |
| sp Q9Y5K6 CD2AP_HUMAN | HUMAN | CD2-associated protein OS=Homo sapiens OX=9606 GN=CD2AP PE=1 SV=1                                                       |
| sp O75191 XYLB_HUMAN  | HUMAN | Xylulose kinase OS=Homo sapiens OX=9606 GN=XYLB PE=1 SV=3                                                               |
| sp Q08378 GOGA3_HUMAN | HUMAN | Golgin subfamily A member 3 OS=Homo sapiens OX=9606 GN=GOLGA3 PE=1 SV=2                                                 |
| sp Q2M389 WASC4_HUMAN | HUMAN | WASH complex subunit 4 OS=Homo sapiens OX=9606 GN=WASHC4 PE=1 SV=2                                                      |
| sp O43314 VIP2_HUMAN  | HUMAN | Inositol hexakisphosphate and diphosphoinositol-pentakisphosphate kinase 2 OS=Homo sapiens OX=9606 GN=PPIP5K2 PE=1 SV=3 |
| sp P30626 SORCN_HUMAN | HUMAN | Sorcin OS=Homo sapiens OX=9606 GN=SRI PE=1 SV=1                                                                         |
| sp P56537 IF6_HUMAN   | HUMAN | Eukaryotic translation initiation factor 6 OS=Homo sapiens OX=9606 GN=EIF6 PE=1 SV=1                                    |
| sp P68133 ACTS_HUMAN  | HUMAN | Actin, alpha skeletal muscle OS=Homo sapiens OX=9606 GN=ACTA1 PE=1 SV=1                                                 |
| sp Q15274 NADC_HUMAN  | HUMAN | Nicotinate-nucleotide pyrophosphorylase [carboxylating] OS=Homo sapiens OX=9606 GN=QPR1 PE=1 SV=3                       |
| sp P50552 VASP_HUMAN  | HUMAN | Vasodilator-stimulated phosphoprotein OS=Homo sapiens OX=9606 GN=VASP PE=1 SV=3                                         |
| sp P49005 DPOD2_HUMAN | HUMAN | DNA polymerase delta subunit 2 OS=Homo sapiens OX=9606 GN=POLD2 PE=1 SV=1                                               |
| sp Q9UK45 LSM7_HUMAN  | HUMAN | U6 snRNA-associated Sm-like protein LSM7 OS=Homo sapiens OX=9606 GN=LSM7 PE=1 SV=1                                      |
| sp P85037 FOXK1_HUMAN | HUMAN | Forkhead box protein K1 OS=Homo sapiens OX=9606 GN=FOXK1 PE=1 SV=1                                                      |
| sp P53597 SUCA_HUMAN  | HUMAN | Succinate--CoA ligase [ADP/GDP-forming] subunit alpha, mitochondrial OS=Homo sapiens OX=9606 GN=SUCLG1 PE=1 SV=4        |
| sp Q92614 MY18A_HUMAN | HUMAN | Unconventional myosin-XVIIIa OS=Homo sapiens OX=9606 GN=MYO18A PE=1 SV=3                                                |
| sp Q8TF42 UBS3B_HUMAN | HUMAN | Ubiquitin-associated and SH3 domain-containing protein B OS=Homo sapiens OX=9606 GN=UBASH3B PE=1 SV=2                   |
| sp P60981 DEST_HUMAN  | HUMAN | Destrin OS=Homo sapiens OX=9606 GN=DSTN PE=1 SV=3                                                                       |
| sp P10619 PPGB_HUMAN  | HUMAN | Lysosomal protective protein OS=Homo sapiens OX=9606 GN=CTSA PE=1 SV=2                                                  |
| sp O60888 CUTA_HUMAN  | HUMAN | Protein CutA OS=Homo sapiens OX=9606 GN=CUTA PE=1 SV=2                                                                  |
| sp Q9NRH3 TBG2_HUMAN  | HUMAN | Tubulin gamma-2 chain OS=Homo sapiens OX=9606 GN=TUBG2 PE=2 SV=1                                                        |

|                       |       |                                                                                                                          |
|-----------------------|-------|--------------------------------------------------------------------------------------------------------------------------|
| sp Q7Z2Z2 EFL1_HUMAN  | HUMAN | Elongation factor-like GTPase 1 OS=Homo sapiens OX=9606 GN=EFL1 PE=1 SV=2                                                |
| sp Q8N806 UBR7_HUMAN  | HUMAN | Putative E3 ubiquitin-protein ligase UBR7 OS=Homo sapiens OX=9606 GN=UBR7 PE=1 SV=2                                      |
| sp Q92835 SHIP1_HUMAN | HUMAN | Phosphatidylinositol 3,4,5-trisphosphate 5-phosphatase 1 OS=Homo sapiens OX=9606 GN=INPP5D PE=1 SV=2                     |
| sp Q9Y6I3 EPN1_HUMAN  | HUMAN | Epsin-1 OS=Homo sapiens OX=9606 GN=EPN1 PE=1 SV=2                                                                        |
| sp Q92905 CSN5_HUMAN  | HUMAN | COP9 signalosome complex subunit 5 OS=Homo sapiens OX=9606 GN=COPS5 PE=1 SV=4                                            |
| sp P19388 RPAB1_HUMAN | HUMAN | DNA-directed RNA polymerases I, II, and III subunit RPABC1 OS=Homo sapiens OX=9606 GN=POLR2E PE=1 SV=4                   |
| sp Q92696 PGTA_HUMAN  | HUMAN | Geranylgeranyl transferase type-2 subunit alpha OS=Homo sapiens OX=9606 GN=RABGGTA PE=1 SV=2                             |
| sp Q9Y5A9 YTHD2_HUMAN | HUMAN | YTH domain-containing family protein 2 OS=Homo sapiens OX=9606 GN=YTHDF2 PE=1 SV=2                                       |
| sp Q9H7E9 CH033_HUMAN | HUMAN | UPF0488 protein C8orf33 OS=Homo sapiens OX=9606 GN=C8orf33 PE=1 SV=1                                                     |
| sp P49643 PRI2_HUMAN  | HUMAN | DNA primase large subunit OS=Homo sapiens OX=9606 GN=PRIM2 PE=1 SV=2                                                     |
| sp P22694 KAPCB_HUMAN | HUMAN | cAMP-dependent protein kinase catalytic subunit beta OS=Homo sapiens OX=9606 GN=PRKACB PE=1 SV=2                         |
| sp Q14651 PLS1_HUMAN  | HUMAN | Plastin-1 OS=Homo sapiens OX=9606 GN=PLS1 PE=1 SV=2                                                                      |
| sp Q9Y3A5 SBDS_HUMAN  | HUMAN | Ribosome maturation protein SBDS OS=Homo sapiens OX=9606 GN=SBDS PE=1 SV=4                                               |
| sp P63010 AP2B1_HUMAN | HUMAN | AP-2 complex subunit beta OS=Homo sapiens OX=9606 GN=AP2B1 PE=1 SV=1                                                     |
| sp Q9NQC3 RTN4_HUMAN  | HUMAN | Reticulon-4 OS=Homo sapiens OX=9606 GN=RTN4 PE=1 SV=2                                                                    |
| sp P78406 RAE1L_HUMAN | HUMAN | mRNA export factor OS=Homo sapiens OX=9606 GN=RAE1 PE=1 SV=1                                                             |
| sp P24941 CDK2_HUMAN  | HUMAN | Cyclin-dependent kinase 2 OS=Homo sapiens OX=9606 GN=CDK2 PE=1 SV=2                                                      |
| sp Q96IV0 NGLY1_HUMAN | HUMAN | Peptide-N(4)-(N-acetyl-beta-glucosaminyl)asparagine amidase OS=Homo sapiens OX=9606 GN=NGLY1 PE=1 SV=1                   |
| sp Q96BW5 PTER_HUMAN  | HUMAN | Phosphotriesterase-related protein OS=Homo sapiens OX=9606 GN=PTER PE=1 SV=1                                             |
| sp Q9UQ35 SRRM2_HUMAN | HUMAN | Serine/arginine repetitive matrix protein 2 OS=Homo sapiens OX=9606 GN=SRRM2 PE=1 SV=2                                   |
| sp Q5VTR2 BRE1A_HUMAN | HUMAN | E3 ubiquitin-protein ligase BRE1A OS=Homo sapiens OX=9606 GN=RNFB20 PE=1 SV=2                                            |
| sp O60826 CCD22_HUMAN | HUMAN | Coiled-coil domain-containing protein 22 OS=Homo sapiens OX=9606 GN=CCDC22 PE=1 SV=1                                     |
| sp O14773 TPP1_HUMAN  | HUMAN | Tripeptidyl-peptidase 1 OS=Homo sapiens OX=9606 GN=TPP1 PE=1 SV=2                                                        |
| sp Q04837 SSBP_HUMAN  | HUMAN | Single-stranded DNA-binding protein, mitochondrial OS=Homo sapiens OX=9606 GN=SSBP1 PE=1 SV=1                            |
| sp Q16763 UBE2S_HUMAN | HUMAN | Ubiquitin-conjugating enzyme E2 S OS=Homo sapiens OX=9606 GN=UBE2S PE=1 SV=2                                             |
| sp Q13555 KCC2G_HUMAN | HUMAN | Calcium/calmodulin-dependent protein kinase type II subunit gamma OS=Homo sapiens OX=9606 GN=CAMK2G PE=1 SV=4            |
| sp Q9H2K8 TAOK3_HUMAN | HUMAN | Serine/threonine-protein kinase TAO3 OS=Homo sapiens OX=9606 GN=TAOK3 PE=1 SV=2                                          |
| sp Q07666 KHDR1_HUMAN | HUMAN | KH domain-containing, RNA-binding, signal transduction-associated protein 1 OS=Homo sapiens OX=9606 GN=KHDRBS1 PE=1 SV=1 |

|                       |       |                                                                                                                         |
|-----------------------|-------|-------------------------------------------------------------------------------------------------------------------------|
| sp P36776 LONM_HUMAN  | HUMAN | Lon protease homolog, mitochondrial OS=Homo sapiens OX=9606 GN=LONP1 PE=1 SV=2                                          |
| sp P05556 ITB1_HUMAN  | HUMAN | Integrin beta-1 OS=Homo sapiens OX=9606 GN=ITGB1 PE=1 SV=2                                                              |
| sp O43813 LANC1_HUMAN | HUMAN | Glutathione S-transferase LANCL1 OS=Homo sapiens OX=9606 GN=LANCL1 PE=1 SV=1                                            |
| sp Q9BV57 MTND_HUMAN  | HUMAN | 1,2-dihydroxy-3-keto-5-methylthiopentene dioxygenase OS=Homo sapiens OX=9606 GN=ADI1 PE=1 SV=1                          |
| sp Q13576 IQGA2_HUMAN | HUMAN | Ras GTPase-activating-like protein IQGAP2 OS=Homo sapiens OX=9606 GN=IQGAP2 PE=1 SV=4                                   |
| sp Q01082 SPTB2_HUMAN | HUMAN | Spectrin beta chain, non-erythrocytic 1 OS=Homo sapiens OX=9606 GN=SPTBN1 PE=1 SV=2                                     |
| sp P58546 MTPN_HUMAN  | HUMAN | Myotrophin OS=Homo sapiens OX=9606 GN=MTPN PE=1 SV=2                                                                    |
| sp P35251 RFC1_HUMAN  | HUMAN | Replication factor C subunit 1 OS=Homo sapiens OX=9606 GN=RFC1 PE=1 SV=4                                                |
| sp Q8N9N8 EIF1A_HUMAN | HUMAN | Probable RNA-binding protein EIF1AD OS=Homo sapiens OX=9606 GN=EIF1AD PE=1 SV=1                                         |
| sp P11717 MPRI_HUMAN  | HUMAN | Cation-independent mannose-6-phosphate receptor OS=Homo sapiens OX=9606 GN=IGF2R PE=1 SV=3                              |
| sp O75608 LYPA1_HUMAN | HUMAN | Acyl-protein thioesterase 1 OS=Homo sapiens OX=9606 GN=LYPLA1 PE=1 SV=1                                                 |
| sp P13929 ENOB_HUMAN  | HUMAN | Beta-enolase OS=Homo sapiens OX=9606 GN=ENO3 PE=1 SV=5                                                                  |
| sp P61026 RAB10_HUMAN | HUMAN | Ras-related protein Rab-10 OS=Homo sapiens OX=9606 GN=RAB10 PE=1 SV=1                                                   |
| sp Q9BTW9 TBCD_HUMAN  | HUMAN | Tubulin-specific chaperone D OS=Homo sapiens OX=9606 GN=TBCD PE=1 SV=2                                                  |
| sp O95071 UBR5_HUMAN  | HUMAN | E3 ubiquitin-protein ligase UBR5 OS=Homo sapiens OX=9606 GN=UBR5 PE=1 SV=2                                              |
| sp Q9H974 QTRT2_HUMAN | HUMAN | Queuine tRNA-ribosyltransferase accessory subunit 2 OS=Homo sapiens OX=9606 GN=QTRT2 PE=1 SV=1                          |
| sp P11279 LAMP1_HUMAN | HUMAN | Lysosome-associated membrane glycoprotein 1 OS=Homo sapiens OX=9606 GN=LAMP1 PE=1 SV=3                                  |
| sp P46013 KI67_HUMAN  | HUMAN | Proliferation marker protein Ki-67 OS=Homo sapiens OX=9606 GN=MKI67 PE=1 SV=2                                           |
| sp Q86WR0 CCD25_HUMAN | HUMAN | Coiled-coil domain-containing protein 25 OS=Homo sapiens OX=9606 GN=CCDC25 PE=1 SV=2                                    |
| sp P78344 IF4G2_HUMAN | HUMAN | Eukaryotic translation initiation factor 4 gamma 2 OS=Homo sapiens OX=9606 GN=EIF4G2 PE=1 SV=1                          |
| sp Q9Y570 PPME1_HUMAN | HUMAN | Protein phosphatase methylesterase 1 OS=Homo sapiens OX=9606 GN=PPME1 PE=1 SV=3                                         |
| sp Q9NZB2 F120A_HUMAN | HUMAN | Constitutive coactivator of PPAR-gamma-like protein 1 OS=Homo sapiens OX=9606 GN=FAM120A PE=1 SV=2                      |
| sp Q9BRT9 SLD5_HUMAN  | HUMAN | DNA replication complex GINS protein SLD5 OS=Homo sapiens OX=9606 GN=GINS4 PE=1 SV=1                                    |
| sp Q99700 ATX2_HUMAN  | HUMAN | Ataxin-2 OS=Homo sapiens OX=9606 GN=ATXN2 PE=1 SV=2                                                                     |
| sp Q96G46 DUS3L_HUMAN | HUMAN | tRNA-dihydrouridine(47) synthase [NAD(P)(+)]-like OS=Homo sapiens OX=9606 GN=DUS3L PE=1 SV=2                            |
| sp Q8N8A2 ANR44_HUMAN | HUMAN | Serine/threonine-protein phosphatase 6 regulatory ankyrin repeat subunit B OS=Homo sapiens OX=9606 GN=ANKRD44 PE=1 SV=3 |
| sp Q7L591 DOK3_HUMAN  | HUMAN | Docking protein 3 OS=Homo sapiens OX=9606 GN=DOK3 PE=1 SV=2                                                             |
| sp Q6YP21 KAT3_HUMAN  | HUMAN | Kynurenine--oxoglutarate transaminase 3 OS=Homo sapiens OX=9606 GN=KYAT3 PE=1 SV=1                                      |
| sp Q5VW32 BROX_HUMAN  | HUMAN | BRO1 domain-containing protein BROX OS=Homo sapiens OX=9606 GN=BROX PE=1 SV=1                                           |
| sp P62304 RUXE_HUMAN  | HUMAN | Small nuclear ribonucleoprotein E OS=Homo sapiens OX=9606 GN=SNRPE PE=1 SV=1                                            |

|                       |       |                                                                                                                               |
|-----------------------|-------|-------------------------------------------------------------------------------------------------------------------------------|
| sp P55212 CASP6_HUMAN | HUMAN | Caspase-6 OS=Homo sapiens OX=9606 GN=CASP6 PE=1 SV=2                                                                          |
| sp P53582 MAP11_HUMAN | HUMAN | Methionine aminopeptidase 1 OS=Homo sapiens OX=9606 GN=METAP1 PE=1 SV=2                                                       |
| sp P60709 ACTB_HUMAN  | HUMAN | Actin, cytoplasmic 1 OS=Homo sapiens OX=9606 GN=ACTB PE=1 SV=1                                                                |
| sp Q71U36 TBA1A_HUMAN | HUMAN | Tubulin alpha-1A chain OS=Homo sapiens OX=9606 GN=TUBA1A PE=1 SV=1                                                            |
| sp Q13509 TBB3_HUMAN  | HUMAN | Tubulin beta-3 chain OS=Homo sapiens OX=9606 GN=TUBB3 PE=1 SV=2                                                               |
| sp P36873 PP1G_HUMAN  | HUMAN | Serine/threonine-protein phosphatase PP1-gamma catalytic subunit OS=Homo sapiens OX=9606 GN=PPP1CC PE=1 SV=1                  |
| sp P62714 PP2AB_HUMAN | HUMAN | Serine/threonine-protein phosphatase 2A catalytic subunit beta isoform OS=Homo sapiens OX=9606 GN=PPP2CB PE=1 SV=1            |
| sp P30154 2AAB_HUMAN  | HUMAN | Serine/threonine-protein phosphatase 2A 65 kDa regulatory subunit A beta isoform OS=Homo sapiens OX=9606 GN=PPP2R1B PE=1 SV=3 |
| sp P08134 RHOC_HUMAN  | HUMAN | Rho-related GTP-binding protein RhoC OS=Homo sapiens OX=9606 GN=RHOC PE=1 SV=1                                                |
| sp O00148 DX39A_HUMAN | HUMAN | ATP-dependent RNA helicase DDX39A OS=Homo sapiens OX=9606 GN=DDX39A PE=1 SV=2                                                 |
| sp Q71UI9 H2AV_HUMAN  | HUMAN | Histone H2A.V OS=Homo sapiens OX=9606 GN=H2AFV PE=1 SV=3                                                                      |
| sp P08754 GNAI3_HUMAN | HUMAN | Guanine nucleotide-binding protein G(i) subunit alpha OS=Homo sapiens OX=9606 GN=GNAI3 PE=1 SV=3                              |
| sp P08779 K1C16_HUMAN | HUMAN | Keratin, type I cytoskeletal 16 OS=Homo sapiens OX=9606 GN=KRT16 PE=1 SV=4                                                    |
| sp Q14344 GNA13_HUMAN | HUMAN | Guanine nucleotide-binding protein subunit alpha-13 OS=Homo sapiens OX=9606 GN=GNA13 PE=1 SV=2                                |
| sp P54725 RD23A_HUMAN | HUMAN | UV excision repair protein RAD23 homolog A OS=Homo sapiens OX=9606 GN=RAD23A PE=1 SV=1                                        |
| sp Q9H2G2 SLK_HUMAN   | HUMAN | STE20-like serine/threonine-protein kinase OS=Homo sapiens OX=9606 GN=SLK PE=1 SV=1                                           |
| sp P51114 FXR1_HUMAN  | HUMAN | Fragile X mental retardation syndrome-related protein 1 OS=Homo sapiens OX=9606 GN=FXR1 PE=1 SV=3                             |
| sp O00505 IMA4_HUMAN  | HUMAN | Importin subunit alpha-4 OS=Homo sapiens OX=9606 GN=KPNA3 PE=1 SV=2                                                           |
| sp O60306 AQR_HUMAN   | HUMAN | RNA helicase aquarius OS=Homo sapiens OX=9606 GN=AQR PE=1 SV=4                                                                |
| sp O60231 DHX16_HUMAN | HUMAN | Pre-mRNA-splicing factor ATP-dependent RNA helicase DHX16 OS=Homo sapiens OX=9606 GN=DHX16 PE=1 SV=2                          |
| sp P06493 CDK1_HUMAN  | HUMAN | Cyclin-dependent kinase 1 OS=Homo sapiens OX=9606 GN=CDK1 PE=1 SV=3                                                           |
| sp P17612 KAPCA_HUMAN | HUMAN | cAMP-dependent protein kinase catalytic subunit alpha OS=Homo sapiens OX=9606 GN=PRKACA PE=1 SV=2                             |
| sp Q12792 TWF1_HUMAN  | HUMAN | Twinfilin-1 OS=Homo sapiens OX=9606 GN=TWF1 PE=1 SV=3                                                                         |
| sp Q9UPW6 SATB2_HUMAN | HUMAN | DNA-binding protein SATB2 OS=Homo sapiens OX=9606 GN=SATB2 PE=1 SV=2                                                          |
| sp P20810 ICAL_HUMAN  | HUMAN | Calpastatin OS=Homo sapiens OX=9606 GN=CAST PE=1 SV=4                                                                         |
| sp Q9Y3B8 ORN_HUMAN   | HUMAN | Oligoribonuclease, mitochondrial OS=Homo sapiens OX=9606 GN=REXO2 PE=1 SV=3                                                   |
| sp Q13094 LCP2_HUMAN  | HUMAN | Lymphocyte cytosolic protein 2 OS=Homo sapiens OX=9606 GN=LCP2 PE=1 SV=1                                                      |
| sp Q9BU89 DOHH_HUMAN  | HUMAN | Deoxyhypusine hydroxylase OS=Homo sapiens OX=9606 GN=DOHH PE=1 SV=1                                                           |

|                       |       |                                                                                                         |
|-----------------------|-------|---------------------------------------------------------------------------------------------------------|
| sp Q01658 NC2B_HUMAN  | HUMAN | Protein Dr1 OS=Homo sapiens OX=9606 GN=DR1 PE=1 SV=1                                                    |
| sp Q00653 NFKB2_HUMAN | HUMAN | Nuclear factor NF-kappa-B p100 subunit OS=Homo sapiens OX=9606 GN=NFKB2 PE=1 SV=4                       |
| sp P49023 PAXI_HUMAN  | HUMAN | Paxillin OS=Homo sapiens OX=9606 GN=PXN PE=1 SV=3                                                       |
| sp O75717 WDHD1_HUMAN | HUMAN | WD repeat and HMG-box DNA-binding protein 1 OS=Homo sapiens OX=9606 GN=WDHD1 PE=1 SV=1                  |
| sp Q15042 RB3GP_HUMAN | HUMAN | Rab3 GTPase-activating protein catalytic subunit OS=Homo sapiens OX=9606 GN=RAB3GAP1 PE=1 SV=3          |
| sp Q9UBB6 NCDN_HUMAN  | HUMAN | Neurochondrin OS=Homo sapiens OX=9606 GN=NCDN PE=1 SV=1                                                 |
| sp Q9NUK0 MBNL3_HUMAN | HUMAN | Muscleblind-like protein 3 OS=Homo sapiens OX=9606 GN=MBNL3 PE=1 SV=2                                   |
| sp Q8N1F7 NUP93_HUMAN | HUMAN | Nuclear pore complex protein Nup93 OS=Homo sapiens OX=9606 GN=NUP93 PE=1 SV=2                           |
| sp Q32P28 P3H1_HUMAN  | HUMAN | Prolyl 3-hydroxylase 1 OS=Homo sapiens OX=9606 GN=P3H1 PE=1 SV=2                                        |
| sp P18621 RL17_HUMAN  | HUMAN | 60S ribosomal protein L17 OS=Homo sapiens OX=9606 GN=RPL17 PE=1 SV=3                                    |
| sp P15090 FABP4_HUMAN | HUMAN | Fatty acid-binding protein, adipocyte OS=Homo sapiens OX=9606 GN=FABP4 PE=1 SV=3                        |
| sp Q9Y6Y8 S23IP_HUMAN | HUMAN | SEC23-interacting protein OS=Homo sapiens OX=9606 GN=SEC23IP PE=1 SV=1                                  |
| sp Q9UPN7 PP6R1_HUMAN | HUMAN | Serine/threonine-protein phosphatase 6 regulatory subunit 1 OS=Homo sapiens OX=9606 GN=PPP6R1 PE=1 SV=5 |
| sp Q9UEE9 CFDP1_HUMAN | HUMAN | Craniofacial development protein 1 OS=Homo sapiens OX=9606 GN=CFDP1 PE=1 SV=1                           |
| sp Q9NWS0 PIHD1_HUMAN | HUMAN | PIH1 domain-containing protein 1 OS=Homo sapiens OX=9606 GN=PIH1D1 PE=1 SV=1                            |
| sp Q9NVT9 ARMC1_HUMAN | HUMAN | Armadillo repeat-containing protein 1 OS=Homo sapiens OX=9606 GN=ARMC1 PE=1 SV=1                        |
| sp Q9H568 ACTL8_HUMAN | HUMAN | Actin-like protein 8 OS=Homo sapiens OX=9606 GN=ACTL8 PE=1 SV=1                                         |
| sp Q9H2U1 DHX36_HUMAN | HUMAN | ATP-dependent DNA/RNA helicase DHX36 OS=Homo sapiens OX=9606 GN=DHX36 PE=1 SV=2                         |
| sp Q9H0L4 CSTFT_HUMAN | HUMAN | Cleavage stimulation factor subunit 2 tau variant OS=Homo sapiens OX=9606 GN=CSTF2T PE=1 SV=1           |
| sp Q9GZZ1 NAA50_HUMAN | HUMAN | N-alpha-acetyltransferase 50 OS=Homo sapiens OX=9606 GN=NAA50 PE=1 SV=1                                 |
| sp Q9BWU0 NADAP_HUMAN | HUMAN | Kanadaplin OS=Homo sapiens OX=9606 GN=SLC4A1AP PE=1 SV=1                                                |
| sp Q9BPX5 ARP5L_HUMAN | HUMAN | Actin-related protein 2/3 complex subunit 5-like protein OS=Homo sapiens OX=9606 GN=ARPC5L PE=1 SV=1    |
| sp Q99543 DNJC2_HUMAN | HUMAN | DnaJ homolog subfamily C member 2 OS=Homo sapiens OX=9606 GN=DNAJC2 PE=1 SV=4                           |
| sp Q96Q15 SMG1_HUMAN  | HUMAN | Serine/threonine-protein kinase SMG1 OS=Homo sapiens OX=9606 GN=SMG1 PE=1 SV=3                          |
| sp Q96GD0 PLPP_HUMAN  | HUMAN | Pyridoxal phosphate phosphatase OS=Homo sapiens OX=9606 GN=PDXP PE=1 SV=2                               |
| sp Q96AB3 ISOC2_HUMAN | HUMAN | Isochorismatase domain-containing protein 2 OS=Homo sapiens OX=9606 GN=ISOC2 PE=1 SV=1                  |
| sp Q92620 PRP16_HUMAN | HUMAN | Pre-mRNA-splicing factor ATP-dependent RNA helicase PRP16 OS=Homo sapiens OX=9606 GN=DHX38 PE=1 SV=2    |
| sp Q8N1G2 CMTR1_HUMAN | HUMAN | Cap-specific mRNA (nucleoside-2'-O-)-methyltransferase 1 OS=Homo sapiens OX=9606 GN=CMTR1 PE=1 SV=1     |

|                       |       |                                                                                                                       |
|-----------------------|-------|-----------------------------------------------------------------------------------------------------------------------|
| sp Q15208 STK38_HUMAN | HUMAN | Serine/threonine-protein kinase 38 OS=Homo sapiens OX=9606 GN=STK38 PE=1 SV=1                                         |
| sp P80297 MT1X_HUMAN  | HUMAN | Metallothionein-1X OS=Homo sapiens OX=9606 GN=MT1X PE=1 SV=1                                                          |
| sp P62266 RS23_HUMAN  | HUMAN | 40S ribosomal protein S23 OS=Homo sapiens OX=9606 GN=RPS23 PE=1 SV=3                                                  |
| sp P55039 DRG2_HUMAN  | HUMAN | Developmentally-regulated GTP-binding protein 2 OS=Homo sapiens OX=9606 GN=DRG2 PE=1 SV=1                             |
| sp P46736 BRCC3_HUMAN | HUMAN | Lys-63-specific deubiquitinase BRCC36 OS=Homo sapiens OX=9606 GN=BRCC3 PE=1 SV=2                                      |
| sp P42898 MTHR_HUMAN  | HUMAN | Methylenetetrahydrofolate reductase OS=Homo sapiens OX=9606 GN=MTHFR PE=1 SV=3                                        |
| sp P32321 DCTD_HUMAN  | HUMAN | Deoxycytidylate deaminase OS=Homo sapiens OX=9606 GN=DCTD PE=1 SV=2                                                   |
| sp P29083 T2EA_HUMAN  | HUMAN | General transcription factor IIE subunit 1 OS=Homo sapiens OX=9606 GN=GTF2E1 PE=1 SV=2                                |
| sp P24928 RPB1_HUMAN  | HUMAN | DNA-directed RNA polymerase II subunit RPB1 OS=Homo sapiens OX=9606 GN=POLR2A PE=1 SV=2                               |
| sp P21283 VATC1_HUMAN | HUMAN | V-type proton ATPase subunit C 1 OS=Homo sapiens OX=9606 GN=ATP6V1C1 PE=1 SV=4                                        |
| sp O95379 TFIP8_HUMAN | HUMAN | Tumor necrosis factor alpha-induced protein 8 OS=Homo sapiens OX=9606 GN=TNFAIP8 PE=1 SV=1                            |
| sp O94888 UBXN7_HUMAN | HUMAN | UBX domain-containing protein 7 OS=Homo sapiens OX=9606 GN=UBXN7 PE=1 SV=2                                            |
| sp O75718 CRTAP_HUMAN | HUMAN | Cartilage-associated protein OS=Homo sapiens OX=9606 GN=CRTAP PE=1 SV=1                                               |
| sp O60568 PLOD3_HUMAN | HUMAN | Multifunctional procollagen lysine hydroxylase and glycosyltransferase LH3 OS=Homo sapiens OX=9606 GN=PLOD3 PE=1 SV=1 |
| sp O60504 VINEX_HUMAN | HUMAN | Vinexin OS=Homo sapiens OX=9606 GN=SORBS3 PE=1 SV=2                                                                   |
| sp O14964 HGS_HUMAN   | HUMAN | Hepatocyte growth factor-regulated tyrosine kinase substrate OS=Homo sapiens OX=9606 GN=HGS PE=1 SV=1                 |
| sp O00743 PPP6_HUMAN  | HUMAN | Serine/threonine-protein phosphatase 6 catalytic subunit OS=Homo sapiens OX=9606 GN=PPP6C PE=1 SV=1                   |
| sp Q9Y5P4 CERT_HUMAN  | HUMAN | Ceramide transfer protein OS=Homo sapiens OX=9606 GN=CERT1 PE=1 SV=1                                                  |
| sp Q9Y3D8 KAD6_HUMAN  | HUMAN | Adenylate kinase isoenzyme 6 OS=Homo sapiens OX=9606 GN=AK6 PE=1 SV=1                                                 |
| sp Q9Y3B4 SF3B6_HUMAN | HUMAN | Splicing factor 3B subunit 6 OS=Homo sapiens OX=9606 GN=SF3B6 PE=1 SV=1                                               |
| sp Q9Y371 SHLB1_HUMAN | HUMAN | Endophilin-B1 OS=Homo sapiens OX=9606 GN=SH3GLB1 PE=1 SV=1                                                            |
| sp Q9Y2V2 CHSP1_HUMAN | HUMAN | Calcium-regulated heat-stable protein 1 OS=Homo sapiens OX=9606 GN=CARHSP1 PE=1 SV=2                                  |
| sp Q9UN37 VPS4A_HUMAN | HUMAN | Vacuolar protein sorting-associated protein 4A OS=Homo sapiens OX=9606 GN=VPS4A PE=1 SV=1                             |
| sp Q9UJX5 APC4_HUMAN  | HUMAN | Anaphase-promoting complex subunit 4 OS=Homo sapiens OX=9606 GN=ANAPC4 PE=1 SV=2                                      |
| sp Q9UJX4 APC5_HUMAN  | HUMAN | Anaphase-promoting complex subunit 5 OS=Homo sapiens OX=9606 GN=ANAPC5 PE=1 SV=2                                      |
| sp Q9UHW5 GPN3_HUMAN  | HUMAN | GPN-loop GTPase 3 OS=Homo sapiens OX=9606 GN=GPN3 PE=1 SV=2                                                           |
| sp Q9UET6 TRM7_HUMAN  | HUMAN | Putative tRNA (cytidine(32)/guanosine(34)-2'-O)-methyltransferase OS=Homo sapiens OX=9606 GN=FTSJ1 PE=1 SV=2          |
| sp Q9NZ63 TLS1_HUMAN  | HUMAN | Telomere length and silencing protein 1 homolog OS=Homo sapiens OX=9606 GN=C9orf78 PE=1 SV=1                          |

|                       |       |                                                                                                              |
|-----------------------|-------|--------------------------------------------------------------------------------------------------------------|
| sp Q9NYB0 TE2IP_HUMAN | HUMAN | Telomeric repeat-binding factor 2-interacting protein 1 OS=Homo sapiens OX=9606 GN=TERF2IP PE=1 SV=1         |
| sp Q9NWX4 HPF1_HUMAN  | HUMAN | Histone PARylation factor 1 OS=Homo sapiens OX=9606 GN=HPF1 PE=1 SV=2                                        |
| sp Q9NVM6 DJC17_HUMAN | HUMAN | DnaJ homolog subfamily C member 17 OS=Homo sapiens OX=9606 GN=DNAJC17 PE=1 SV=1                              |
| sp Q9NVM4 ANM7_HUMAN  | HUMAN | Protein arginine N-methyltransferase 7 OS=Homo sapiens OX=9606 GN=PRMT7 PE=1 SV=1                            |
| sp Q9NQ88 TIGAR_HUMAN | HUMAN | Fructose-2,6-bisphosphatase TIGAR OS=Homo sapiens OX=9606 GN=TIGAR PE=1 SV=1                                 |
| sp Q9H944 MED20_HUMAN | HUMAN | Mediator of RNA polymerase II transcription subunit 20 OS=Homo sapiens OX=9606 GN=MED20 PE=1 SV=1            |
| sp Q9H8S9 MOB1A_HUMAN | HUMAN | MOB kinase activator 1A OS=Homo sapiens OX=9606 GN=MOB1A PE=1 SV=4                                           |
| sp Q9H814 PHAX_HUMAN  | HUMAN | Phosphorylated adapter RNA export protein OS=Homo sapiens OX=9606 GN=PHAX PE=1 SV=1                          |
| sp Q9H5X1 CIA2A_HUMAN | HUMAN | Cytosolic iron-sulfur assembly component 2A OS=Homo sapiens OX=9606 GN=CIAO2A PE=1 SV=1                      |
| sp Q9H446 RWDD1_HUMAN | HUMAN | RWD domain-containing protein 1 OS=Homo sapiens OX=9606 GN=RWDD1 PE=1 SV=1                                   |
| sp Q9H0W9 CK054_HUMAN | HUMAN | Ester hydrolase C11orf54 OS=Homo sapiens OX=9606 GN=C11orf54 PE=1 SV=1                                       |
| sp Q9H008 LHPP_HUMAN  | HUMAN | Phospholysine phosphohistidine inorganic pyrophosphate phosphatase OS=Homo sapiens OX=9606 GN=LHPP PE=1 SV=2 |
| sp Q9BV20 MTNA_HUMAN  | HUMAN | Methylthioribose-1-phosphate isomerase OS=Homo sapiens OX=9606 GN=MRI1 PE=1 SV=1                             |
| sp Q9BUH6 PAXX_HUMAN  | HUMAN | Protein PAXX OS=Homo sapiens OX=9606 GN=PAXX PE=1 SV=2                                                       |
| sp Q9BTE7 DCNL5_HUMAN | HUMAN | DCN1-like protein 5 OS=Homo sapiens OX=9606 GN=DCUN1D5 PE=1 SV=1                                             |
| sp Q9BSL1 UBAC1_HUMAN | HUMAN | Ubiquitin-associated domain-containing protein 1 OS=Homo sapiens OX=9606 GN=UBAC1 PE=1 SV=1                  |
| sp Q9BRX5 PSF3_HUMAN  | HUMAN | DNA replication complex GINS protein PSF3 OS=Homo sapiens OX=9606 GN=GINS3 PE=1 SV=1                         |
| sp Q9BRJ6 CG050_HUMAN | HUMAN | Uncharacterized protein C7orf50 OS=Homo sapiens OX=9606 GN=C7orf50 PE=1 SV=1                                 |
| sp Q96S44 PRPK_HUMAN  | HUMAN | EKC/KEOPS complex subunit TP53RK OS=Homo sapiens OX=9606 GN=TP53RK PE=1 SV=2                                 |
| sp Q96PU8 QKI_HUMAN   | HUMAN | Protein quaking OS=Homo sapiens OX=9606 GN=QKI PE=1 SV=1                                                     |
| sp Q96IJ6 GMPPA_HUMAN | HUMAN | Mannose-1-phosphate guanylttransferase alpha OS=Homo sapiens OX=9606 GN=GMPPA PE=1 SV=1                      |
| sp Q96GA7 SDSL_HUMAN  | HUMAN | Serine dehydratase-like OS=Homo sapiens OX=9606 GN=SDSL PE=1 SV=1                                            |
| sp Q96DH6 MSI2H_HUMAN | HUMAN | RNA-binding protein Musashi homolog 2 OS=Homo sapiens OX=9606 GN=MSI2 PE=1 SV=1                              |
| sp Q96B36 AKTS1_HUMAN | HUMAN | Proline-rich AKT1 substrate 1 OS=Homo sapiens OX=9606 GN=AKT1S1 PE=1 SV=1                                    |
| sp Q96AT9 RPE_HUMAN   | HUMAN | Ribulose-phosphate 3-epimerase OS=Homo sapiens OX=9606 GN=RPE PE=1 SV=1                                      |
| sp Q969E8 TSR2_HUMAN  | HUMAN | Pre-rRNA-processing protein TSR2 homolog OS=Homo sapiens OX=9606 GN=TSR2 PE=1 SV=1                           |
| sp Q92917 GPKOW_HUMAN | HUMAN | G-patch domain and KOW motifs-containing protein OS=Homo sapiens OX=9606 GN=GPKOW PE=1 SV=2                  |
| sp Q92466 DDB2_HUMAN  | HUMAN | DNA damage-binding protein 2 OS=Homo sapiens OX=9606 GN=DDB2 PE=1 SV=1                                       |
| sp Q8WZ82 OVCA2_HUMAN | HUMAN | Esterase OVCA2 OS=Homo sapiens OX=9606 GN=OVCA2 PE=1 SV=1                                                    |
| sp Q8WX92 NELFB_HUMAN | HUMAN | Negative elongation factor B OS=Homo sapiens OX=9606 GN=NELFB PE=1 SV=1                                      |

|                        |       |                                                                                                      |
|------------------------|-------|------------------------------------------------------------------------------------------------------|
| sp Q8TEA8 DTD1_HUMAN   | HUMAN | D-aminoacyl-tRNA deacylase 1 OS=Homo sapiens OX=9606 GN=DTD1 PE=1 SV=2                               |
| sp Q8TDN4 CABL1_HUMAN  | HUMAN | CDK5 and ABL1 enzyme substrate 1 OS=Homo sapiens OX=9606 GN=CABLES1 PE=1 SV=2                        |
| sp Q8TCD5 NT5C_HUMAN   | HUMAN | 5'(3')-deoxyribonucleotidase, cytosolic type OS=Homo sapiens OX=9606 GN=NT5C PE=1 SV=2               |
| sp Q8IZ73 RUSD2_HUMAN  | HUMAN | RNA pseudouridylate synthase domain-containing protein 2 OS=Homo sapiens OX=9606 GN=RPUSD2 PE=1 SV=2 |
| sp Q8IXM2 BAP18_HUMAN  | HUMAN | Chromatin complexes subunit BAP18 OS=Homo sapiens OX=9606 GN=BAP18 PE=1 SV=1                         |
| sp Q8IWT0 ARCH_HUMAN   | HUMAN | Protein archease OS=Homo sapiens OX=9606 GN=ZBTB8OS PE=1 SV=2                                        |
| sp Q86V21 AACS_HUMAN   | HUMAN | Acetoacetyl-CoA synthetase OS=Homo sapiens OX=9606 GN=AACS PE=1 SV=1                                 |
| sp Q86SG5 S1A7A_HUMAN  | HUMAN | Protein S100-A7A OS=Homo sapiens OX=9606 GN=S100A7A PE=1 SV=3                                        |
| sp Q7Z4H8 PLGT3_HUMAN  | HUMAN | Protein O-glucosyltransferase 3 OS=Homo sapiens OX=9606 GN=POGLUT3 PE=1 SV=2                         |
| sp Q7Z4G1 COMD6_HUMAN  | HUMAN | COMM domain-containing protein 6 OS=Homo sapiens OX=9606 GN=COMMMD6 PE=1 SV=1                        |
| sp Q7Z2W4 ZCCHV_HUMAN  | HUMAN | Zinc finger CCCH-type antiviral protein 1 OS=Homo sapiens OX=9606 GN=ZC3HAV1 PE=1 SV=3               |
| sp Q6P3X3 TTC27_HUMAN  | HUMAN | Tetratricopeptide repeat protein 27 OS=Homo sapiens OX=9606 GN=TTC27 PE=1 SV=1                       |
| sp Q68EM7 RHG17_HUMAN  | HUMAN | Rho GTPase-activating protein 17 OS=Homo sapiens OX=9606 GN=ARHGAP17 PE=1 SV=1                       |
| sp Q5T447 HECTD3_HUMAN | HUMAN | E3 ubiquitin-protein ligase HECTD3 OS=Homo sapiens OX=9606 GN=HECTD3 PE=1 SV=1                       |
| sp Q4V328 GRAP1_HUMAN  | HUMAN | GRIP1-associated protein 1 OS=Homo sapiens OX=9606 GN=GRIPAP1 PE=1 SV=2                              |
| sp Q16698 DECR_HUMAN   | HUMAN | 2,4-dienoyl-CoA reductase, mitochondrial OS=Homo sapiens OX=9606 GN=DECR1 PE=1 SV=1                  |
| sp Q15427 SF3B4_HUMAN  | HUMAN | Splicing factor 3B subunit 4 OS=Homo sapiens OX=9606 GN=SF3B4 PE=1 SV=1                              |
| sp Q14691 PSF1_HUMAN   | HUMAN | DNA replication complex GINS protein PSF1 OS=Homo sapiens OX=9606 GN=GINS1 PE=1 SV=1                 |
| sp Q14498 RBM39_HUMAN  | HUMAN | RNA-binding protein 39 OS=Homo sapiens OX=9606 GN=RBM39 PE=1 SV=2                                    |
| sp Q14331 FRG1_HUMAN   | HUMAN | Protein FRG1 OS=Homo sapiens OX=9606 GN=FRG1 PE=1 SV=1                                               |
| sp Q13112 CAF1B_HUMAN  | HUMAN | Chromatin assembly factor 1 subunit B OS=Homo sapiens OX=9606 GN=CHAF1B PE=1 SV=1                    |
| sp Q12933 TRAF2_HUMAN  | HUMAN | TNF receptor-associated factor 2 OS=Homo sapiens OX=9606 GN=TRAF2 PE=1 SV=2                          |
| sp Q01081 U2AF1_HUMAN  | HUMAN | Splicing factor U2AF 35 kDa subunit OS=Homo sapiens OX=9606 GN=U2AF1 PE=1 SV=3                       |
| sp Q00169 PIPNA_HUMAN  | HUMAN | Phosphatidylinositol transfer protein alpha isoform OS=Homo sapiens OX=9606 GN=PITPNA PE=1 SV=2      |
| sp P98179 RBM3_HUMAN   | HUMAN | RNA-binding protein 3 OS=Homo sapiens OX=9606 GN=RBM3 PE=1 SV=1                                      |
| sp P63272 SPT4H_HUMAN  | HUMAN | Transcription elongation factor SPT4 OS=Homo sapiens OX=9606 GN=SUPT4H1 PE=1 SV=1                    |
| sp P62308 RUXG_HUMAN   | HUMAN | Small nuclear ribonucleoprotein G OS=Homo sapiens OX=9606 GN=SNRPG PE=1 SV=1                         |
| sp P61960 UFM1_HUMAN   | HUMAN | Ubiquitin-fold modifier 1 OS=Homo sapiens OX=9606 GN=UFM1 PE=1 SV=1                                  |
| sp P61626 LYSC_HUMAN   | HUMAN | Lysozyme C OS=Homo sapiens OX=9606 GN=LYZ PE=1 SV=1                                                  |
| sp P61599 NAA20_HUMAN  | HUMAN | N-alpha-acetyltransferase 20 OS=Homo sapiens OX=9606 GN=NAA20 PE=1 SV=1                              |

|                        |       |                                                                                                                    |
|------------------------|-------|--------------------------------------------------------------------------------------------------------------------|
| sp P53611 PGTB2_HUMAN  | HUMAN | Geranylgeranyl transferase type-2 subunit beta OS=Homo sapiens OX=9606 GN=RABGGTB PE=1 SV=2                        |
| sp P53602 MVD1_HUMAN   | HUMAN | Diphosphomevalonate decarboxylase OS=Homo sapiens OX=9606 GN=MVD PE=1 SV=1                                         |
| sp P52758 RIDA_HUMAN   | HUMAN | 2-iminobutanoate/2-iminopropanoate deaminase OS=Homo sapiens OX=9606 GN=RIDA PE=1 SV=1                             |
| sp P49840 GSK3A_HUMAN  | HUMAN | Glycogen synthase kinase-3 alpha OS=Homo sapiens OX=9606 GN=GSK3A PE=1 SV=2                                        |
| sp P49755 TMED10_HUMAN | HUMAN | Transmembrane emp24 domain-containing protein 10 OS=Homo sapiens OX=9606 GN=TMED10 PE=1 SV=2                       |
| sp P49459 UBE2A_HUMAN  | HUMAN | Ubiquitin-conjugating enzyme E2 A OS=Homo sapiens OX=9606 GN=UBE2A PE=1 SV=2                                       |
| sp P40306 PSB10_HUMAN  | HUMAN | Proteasome subunit beta type-10 OS=Homo sapiens OX=9606 GN=PSMB10 PE=1 SV=1                                        |
| sp P40222 TXLNA_HUMAN  | HUMAN | Alpha-taxilin OS=Homo sapiens OX=9606 GN=TXLNA PE=1 SV=3                                                           |
| sp P35270 SPRE_HUMAN   | HUMAN | Sepiapterin reductase OS=Homo sapiens OX=9606 GN=SPR PE=1 SV=1                                                     |
| sp P32929 CGL_HUMAN    | HUMAN | Cystathionine gamma-lyase OS=Homo sapiens OX=9606 GN=CTH PE=1 SV=3                                                 |
| sp P31040 SDHA_HUMAN   | HUMAN | Succinate dehydrogenase [ubiquinone] flavoprotein subunit, mitochondrial OS=Homo sapiens OX=9606 GN=SDHA PE=1 SV=2 |
| sp P21912 SDHB_HUMAN   | HUMAN | Succinate dehydrogenase [ubiquinone] iron-sulfur subunit, mitochondrial OS=Homo sapiens OX=9606 GN=SDHB PE=1 SV=3  |
| sp P20962 PTMS_HUMAN   | HUMAN | Parathymosin OS=Homo sapiens OX=9606 GN=PTMS PE=1 SV=2                                                             |
| sp P19387 RPB3_HUMAN   | HUMAN | DNA-directed RNA polymerase II subunit RPB3 OS=Homo sapiens OX=9606 GN=POLR2C PE=1 SV=2                            |
| sp P16333 NCK1_HUMAN   | HUMAN | Cytoplasmic protein NCK1 OS=Homo sapiens OX=9606 GN=NCK1 PE=1 SV=1                                                 |
| sp P11234 RALB_HUMAN   | HUMAN | Ras-related protein Ral-B OS=Homo sapiens OX=9606 GN=RALB PE=1 SV=1                                                |
| sp P10153 RNASE2_HUMAN | HUMAN | Non-secretory ribonuclease OS=Homo sapiens OX=9606 GN=RNASE2 PE=1 SV=2                                             |
| sp P0DPB6 RPAC2_HUMAN  | HUMAN | DNA-directed RNA polymerases I and III subunit RPAC2 OS=Homo sapiens OX=9606 GN=POLR1D PE=1 SV=1                   |
| sp P08397 HEM3_HUMAN   | HUMAN | Porphobilinogen deaminase OS=Homo sapiens OX=9606 GN=HMBS PE=1 SV=2                                                |
| sp P05386 RLA1_HUMAN   | HUMAN | 60S acidic ribosomal protein P1 OS=Homo sapiens OX=9606 GN=RPLP1 PE=1 SV=1                                         |
| sp P01040 CYTA_HUMAN   | HUMAN | Cystatin-A OS=Homo sapiens OX=9606 GN=CSTA PE=1 SV=1                                                               |
| sp O95777 LSM8_HUMAN   | HUMAN | U6 snRNA-associated Sm-like protein LSM8 OS=Homo sapiens OX=9606 GN=LSM8 PE=1 SV=3                                 |
| sp O95372 LYPA2_HUMAN  | HUMAN | Acyl-protein thioesterase 2 OS=Homo sapiens OX=9606 GN=LYPLA2 PE=1 SV=1                                            |
| sp O95319 CELF2_HUMAN  | HUMAN | CUGBP Elav-like family member 2 OS=Homo sapiens OX=9606 GN=CELF2 PE=1 SV=1                                         |
| sp O75886 STAM2_HUMAN  | HUMAN | Signal transducing adapter molecule 2 OS=Homo sapiens OX=9606 GN=STAM2 PE=1 SV=1                                   |
| sp O75396 SEC22B_HUMAN | HUMAN | Vesicle-trafficking protein SEC22b OS=Homo sapiens OX=9606 GN=SEC22B PE=1 SV=4                                     |
| sp O75379 VAMP4_HUMAN  | HUMAN | Vesicle-associated membrane protein 4 OS=Homo sapiens OX=9606 GN=VAMP4 PE=1 SV=2                                   |
| sp O60508 PRP17_HUMAN  | HUMAN | Pre-mRNA-processing factor 17 OS=Homo sapiens OX=9606 GN=CDC40 PE=1 SV=1                                           |
| sp O43852 CALU_HUMAN   | HUMAN | Calumenin OS=Homo sapiens OX=9606 GN=CALU PE=1 SV=2                                                                |

|                       |       |                                                                                                                                            |
|-----------------------|-------|--------------------------------------------------------------------------------------------------------------------------------------------|
| sp O43837 IDH3B_HUMAN | HUMAN | Isocitrate dehydrogenase [NAD] subunit beta, mitochondrial OS=Homo sapiens OX=9606 GN=IDH3B PE=1 SV=2                                      |
| sp O15260 SURF4_HUMAN | HUMAN | Surfeit locus protein 4 OS=Homo sapiens OX=9606 GN=SURF4 PE=1 SV=3                                                                         |
| sp O14828 SCAM3_HUMAN | HUMAN | Secretory carrier-associated membrane protein 3 OS=Homo sapiens OX=9606 GN=SCAMP3 PE=1 SV=3                                                |
| sp O14757 CHK1_HUMAN  | HUMAN | Serine/threonine-protein kinase Chk1 OS=Homo sapiens OX=9606 GN=CHK1 PE=1 SV=2                                                             |
| sp O00193 SMAP_HUMAN  | HUMAN | Small acidic protein OS=Homo sapiens OX=9606 GN=SMAP PE=1 SV=1                                                                             |
| sp A6NHR9 SMHD1_HUMAN | HUMAN | Structural maintenance of chromosomes flexible hinge domain-containing protein 1 OS=Homo sapiens OX=9606 GN=SMCHD1 PE=1 SV=2               |
| sp P22570 ADRO_HUMAN  | HUMAN | NADPH:adrenodoxin oxidoreductase, mitochondrial OS=Homo sapiens OX=9606 GN=FDXR PE=1 SV=3                                                  |
| sp P09668 CATH_HUMAN  | HUMAN | Pro-cathepsin H OS=Homo sapiens OX=9606 GN=CTSH PE=1 SV=4                                                                                  |
| sp P20339 RAB5A_HUMAN | HUMAN | Ras-related protein Rab-5A OS=Homo sapiens OX=9606 GN=RAB5A PE=1 SV=2                                                                      |
| sp O95721 SNP29_HUMAN | HUMAN | Synaptosomal-associated protein 29 OS=Homo sapiens OX=9606 GN=SNAP29 PE=1 SV=1                                                             |
| sp G2XKQ0 SUMO5_HUMAN | HUMAN | Small ubiquitin-related modifier 5 OS=Homo sapiens OX=9606 GN=SUMO1P1 PE=1 SV=2                                                            |
| sp Q86TU7 SETD3_HUMAN | HUMAN | Actin-histidine N-methyltransferase OS=Homo sapiens OX=9606 GN=SETD3 PE=1 SV=1                                                             |
| sp O00418 EEF2K_HUMAN | HUMAN | Eukaryotic elongation factor 2 kinase OS=Homo sapiens OX=9606 GN=EEF2K PE=1 SV=2                                                           |
| sp P62312 LSM6_HUMAN  | HUMAN | U6 snRNA-associated Sm-like protein LSM6 OS=Homo sapiens OX=9606 GN=LSM6 PE=1 SV=1                                                         |
| sp Q9UH65 SWP70_HUMAN | HUMAN | Switch-associated protein 70 OS=Homo sapiens OX=9606 GN=SWAP70 PE=1 SV=1                                                                   |
| sp O94763 RMP_HUMAN   | HUMAN | Unconventional prefoldin RPB5 interactor 1 OS=Homo sapiens OX=9606 GN=URI1 PE=1 SV=3                                                       |
| sp P15559 NQO1_HUMAN  | HUMAN | NAD(P)H dehydrogenase [quinone] 1 OS=Homo sapiens OX=9606 GN=NQO1 PE=1 SV=1                                                                |
| sp Q9Y6E0 STK24_HUMAN | HUMAN | Serine/threonine-protein kinase 24 OS=Homo sapiens OX=9606 GN=STK24 PE=1 SV=1                                                              |
| sp Q9BWF3 RBM4_HUMAN  | HUMAN | RNA-binding protein 4 OS=Homo sapiens OX=9606 GN=RBM4 PE=1 SV=1                                                                            |
| sp Q69YN2 C19L1_HUMAN | HUMAN | CWF19-like protein 1 OS=Homo sapiens OX=9606 GN=CWF19L1 PE=1 SV=2                                                                          |
| sp Q7Z2T5 TRM1L_HUMAN | HUMAN | TRMT1-like protein OS=Homo sapiens OX=9606 GN=TRMT1L PE=1 SV=2                                                                             |
| sp Q13541 4EBP1_HUMAN | HUMAN | Eukaryotic translation initiation factor 4E-binding protein 1 OS=Homo sapiens OX=9606 GN=EIF4EBP1 PE=1 SV=3                                |
| sp O60264 SMCA5_HUMAN | HUMAN | SWI/SNF-related matrix-associated actin-dependent regulator of chromatin subfamily A member 5 OS=Homo sapiens OX=9606 GN=SMARCA5 PE=1 SV=1 |
| sp Q9NUD5 ZCHC3_HUMAN | HUMAN | Zinc finger CCHC domain-containing protein 3 OS=Homo sapiens OX=9606 GN=ZCCHC3 PE=1 SV=2                                                   |
| sp P49137 MAPK2_HUMAN | HUMAN | MAP kinase-activated protein kinase 2 OS=Homo sapiens OX=9606 GN=MAPKAPK2 PE=1 SV=1                                                        |
| sp P13473 LAMP2_HUMAN | HUMAN | Lysosome-associated membrane glycoprotein 2 OS=Homo sapiens OX=9606 GN=LAMP2 PE=1 SV=2                                                     |
| sp O00329 PK3CD_HUMAN | HUMAN | Phosphatidylinositol 4,5-bisphosphate 3-kinase catalytic subunit delta isoform OS=Homo sapiens OX=9606 GN=PIK3CD PE=1 SV=2                 |
| sp Q9H9Q2 CSN7B_HUMAN | HUMAN | COP9 signalosome complex subunit 7b OS=Homo sapiens OX=9606 GN=COPS7B PE=1 SV=1                                                            |

|                       |       |                                                                                                         |
|-----------------------|-------|---------------------------------------------------------------------------------------------------------|
| sp P30047 GFRP_HUMAN  | HUMAN | GTP cyclohydrolase 1 feedback regulatory protein OS=Homo sapiens OX=9606 GN=GCHFR PE=1 SV=3             |
| sp Q14919 NC2A_HUMAN  | HUMAN | Dr1-associated corepressor OS=Homo sapiens OX=9606 GN=DRAP1 PE=1 SV=3                                   |
| sp Q9UHR5 S30BP_HUMAN | HUMAN | SAP30-binding protein OS=Homo sapiens OX=9606 GN=SAP30BP PE=1 SV=1                                      |
| sp Q9NY27 PP4R2_HUMAN | HUMAN | Serine/threonine-protein phosphatase 4 regulatory subunit 2 OS=Homo sapiens OX=9606 GN=PPP4R2 PE=1 SV=3 |
| sp Q16650 TBR1_HUMAN  | HUMAN | T-box brain protein 1 OS=Homo sapiens OX=9606 GN=TBR1 PE=1 SV=1                                         |
| sp P61764 STXB1_HUMAN | HUMAN | Syntaxin-binding protein 1 OS=Homo sapiens OX=9606 GN=STXB1 PE=1 SV=1                                   |
| sp Q9UHH6 SHPK_HUMAN  | HUMAN | Sedoheptulokinase OS=Homo sapiens OX=9606 GN=SHPK PE=1 SV=3                                             |
| sp P61923 COPZ1_HUMAN | HUMAN | Coatomer subunit zeta-1 OS=Homo sapiens OX=9606 GN=COPZ1 PE=1 SV=1                                      |
| sp Q13242 SRSF9_HUMAN | HUMAN | Serine/arginine-rich splicing factor 9 OS=Homo sapiens OX=9606 GN=SRSF9 PE=1 SV=1                       |
| sp P02786 TFR1_HUMAN  | HUMAN | Transferrin receptor protein 1 OS=Homo sapiens OX=9606 GN=TFRC PE=1 SV=2                                |
| sp Q9Y3L3 3BP1_HUMAN  | HUMAN | SH3 domain-binding protein 1 OS=Homo sapiens OX=9606 GN=SH3BP1 PE=1 SV=3                                |
| sp P16401 H15_HUMAN   | HUMAN | Histone H1.5 OS=Homo sapiens OX=9606 GN=H1-5 PE=1 SV=3                                                  |
| sp Q9UHD2 TBK1_HUMAN  | HUMAN | Serine/threonine-protein kinase TBK1 OS=Homo sapiens OX=9606 GN=TBK1 PE=1 SV=1                          |
| sp Q2TAY7 SMU1_HUMAN  | HUMAN | WD40 repeat-containing protein SMU1 OS=Homo sapiens OX=9606 GN=SMU1 PE=1 SV=2                           |
| sp O95376 ARI2_HUMAN  | HUMAN | E3 ubiquitin-protein ligase ARIH2 OS=Homo sapiens OX=9606 GN=ARIH2 PE=1 SV=1                            |
| sp Q00577 PURA_HUMAN  | HUMAN | Transcriptional activator protein Pur-alpha OS=Homo sapiens OX=9606 GN=PURA PE=1 SV=2                   |
| sp O75832 PSD10_HUMAN | HUMAN | 26S proteasome non-ATPase regulatory subunit 10 OS=Homo sapiens OX=9606 GN=PSMD10 PE=1 SV=1             |
| sp P61326 MGN_HUMAN   | HUMAN | Protein mago nashi homolog OS=Homo sapiens OX=9606 GN=MAGOH PE=1 SV=1                                   |
| sp O95989 NUDT3_HUMAN | HUMAN | Diphosphoinositol polyphosphate phosphohydrolase 1 OS=Homo sapiens OX=9606 GN=NUDT3 PE=1 SV=1           |
| sp Q7Z4Q2 HEAT3_HUMAN | HUMAN | HEAT repeat-containing protein 3 OS=Homo sapiens OX=9606 GN=HEATR3 PE=1 SV=2                            |
| sp O95747 OXSR1_HUMAN | HUMAN | Serine/threonine-protein kinase OSR1 OS=Homo sapiens OX=9606 GN=OXSR1 PE=1 SV=1                         |
| sp Q9Y2D5 AKAP2_HUMAN | HUMAN | A-kinase anchor protein 2 OS=Homo sapiens OX=9606 GN=AKAP2 PE=1 SV=3                                    |
| sp Q9BWT3 PAPOG_HUMAN | HUMAN | Poly(A) polymerase gamma OS=Homo sapiens OX=9606 GN=PAPOLG PE=1 SV=2                                    |
| sp Q8TBX8 PI42C_HUMAN | HUMAN | Phosphatidylinositol 5-phosphate 4-kinase type-2 gamma OS=Homo sapiens OX=9606 GN=PIP4K2C PE=1 SV=3     |
| sp P35573 GDE_HUMAN   | HUMAN | Glycogen debranching enzyme OS=Homo sapiens OX=9606 GN=AGL PE=1 SV=3                                    |
| sp Q08AM6 VAC14_HUMAN | HUMAN | Protein VAC14 homolog OS=Homo sapiens OX=9606 GN=VAC14 PE=1 SV=1                                        |
| sp P08240 SRPRA_HUMAN | HUMAN | Signal recognition particle receptor subunit alpha OS=Homo sapiens OX=9606 GN=SRPRA PE=1 SV=2           |
| sp Q9Y237 PIN4_HUMAN  | HUMAN | Peptidyl-prolyl cis-trans isomerase NIMA-interacting 4 OS=Homo sapiens OX=9606 GN=PIN4 PE=1 SV=1        |
| sp Q05519 SRS11_HUMAN | HUMAN | Serine/arginine-rich splicing factor 11 OS=Homo sapiens OX=9606 GN=SRSF11 PE=1 SV=1                     |
| sp P52732 KIF11_HUMAN | HUMAN | Kinesin-like protein KIF11 OS=Homo sapiens OX=9606 GN=KIF11 PE=1 SV=2                                   |

|                       |       |                                                                                                            |
|-----------------------|-------|------------------------------------------------------------------------------------------------------------|
| sp Q96PK6 RBM14_HUMAN | HUMAN | RNA-binding protein 14 OS=Homo sapiens OX=9606 GN=RBM14 PE=1 SV=2                                          |
| sp Q15154 PCM1_HUMAN  | HUMAN | Pericentriolar material 1 protein OS=Homo sapiens OX=9606 GN=PCM1 PE=1 SV=5                                |
| sp Q7Z417 LIMS2_HUMAN | HUMAN | LIM and senescent cell antigen-like-containing domain protein 2 OS=Homo sapiens OX=9606 GN=LIMS2 PE=1 SV=1 |
| sp Q8TB72 PUM2_HUMAN  | HUMAN | Pumilio homolog 2 OS=Homo sapiens OX=9606 GN=PUM2 PE=1 SV=2                                                |
| sp Q9HAB8 PPCS_HUMAN  | HUMAN | Phosphopantothenate--cysteine ligase OS=Homo sapiens OX=9606 GN=PPCS PE=1 SV=2                             |
| sp P54252 ATX3_HUMAN  | HUMAN | Ataxin-3 OS=Homo sapiens OX=9606 GN=ATXN3 PE=1 SV=5                                                        |
| sp Q8IZ69 TRM2A_HUMAN | HUMAN | tRNA (uracil-5-)-methyltransferase homolog A OS=Homo sapiens OX=9606 GN=TRMT2A PE=1 SV=2                   |
| sp Q86XP3 DDX42_HUMAN | HUMAN | ATP-dependent RNA helicase DDX42 OS=Homo sapiens OX=9606 GN=DDX42 PE=1 SV=1                                |
| sp P08195 4F2_HUMAN   | HUMAN | 4F2 cell-surface antigen heavy chain OS=Homo sapiens OX=9606 GN=SLC3A2 PE=1 SV=3                           |
| sp P49916 DNLI3_HUMAN | HUMAN | DNA ligase 3 OS=Homo sapiens OX=9606 GN=LIG3 PE=1 SV=2                                                     |
| sp Q96EV8 DTBP1_HUMAN | HUMAN | Dysbindin OS=Homo sapiens OX=9606 GN=DTNBP1 PE=1 SV=1                                                      |
| sp P50993 AT1A2_HUMAN | HUMAN | Sodium/potassium-transporting ATPase subunit alpha-2 OS=Homo sapiens OX=9606 GN=ATP1A2 PE=1 SV=1           |
| sp Q13131 AAPK1_HUMAN | HUMAN | 5'-AMP-activated protein kinase catalytic subunit alpha-1 OS=Homo sapiens OX=9606 GN=PRKAA1 PE=1 SV=4      |
| sp Q04828 AK1C1_HUMAN | HUMAN | Aldo-keto reductase family 1 member C1 OS=Homo sapiens OX=9606 GN=AKR1C1 PE=1 SV=1                         |
| sp O43747 AP1G1_HUMAN | HUMAN | AP-1 complex subunit gamma-1 OS=Homo sapiens OX=9606 GN=AP1G1 PE=1 SV=5                                    |
| sp O00139 KIF2A_HUMAN | HUMAN | Kinesin-like protein KIF2A OS=Homo sapiens OX=9606 GN=KIF2A PE=1 SV=3                                      |
| sp Q5JTZ9 SYAM_HUMAN  | HUMAN | Alanine--tRNA ligase, mitochondrial OS=Homo sapiens OX=9606 GN=AARS2 PE=1 SV=1                             |
| sp P35236 PTN7_HUMAN  | HUMAN | Tyrosine-protein phosphatase non-receptor type 7 OS=Homo sapiens OX=9606 GN=PTPN7 PE=1 SV=3                |

Supplementary Figure S1: Lipidomic Analysis of U937 EVs and U937 CDNs. Lipids are quantified as a percentage of the total lipids. Data presented as mean  $\pm$  SEM (n = 3). \*\*\* indicates p < 0.001.

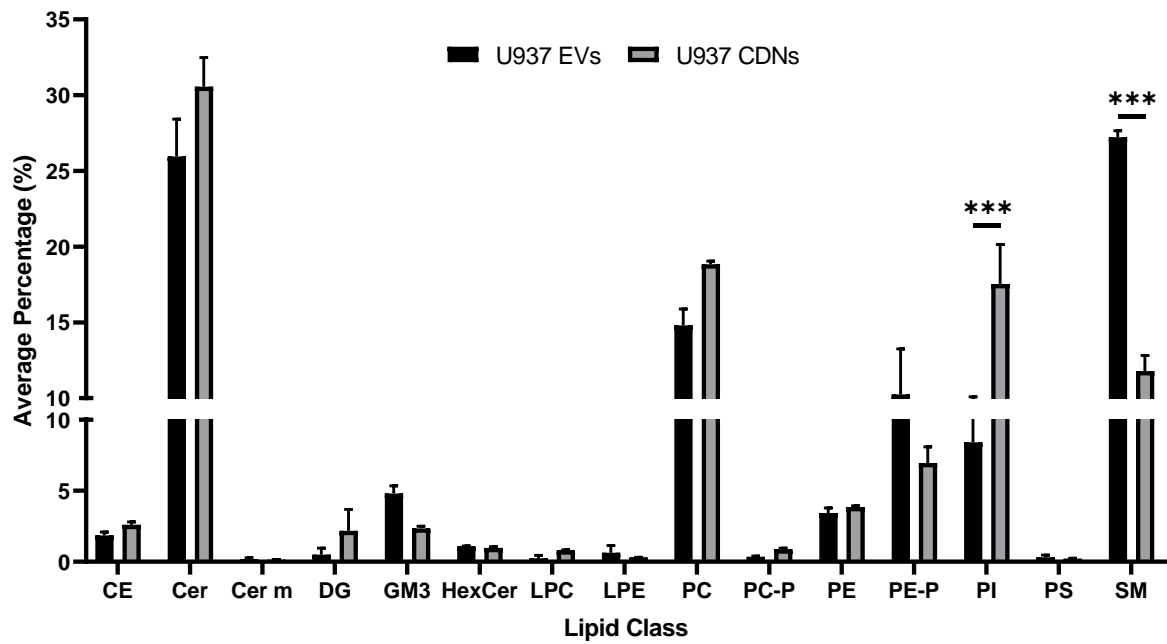

Supplementary Figure S2: Comparison of mean Ct values between U937 cells (indicated as CP on the x-axis) and U937 CDNs (indicated as CDNs on the y-axis). n = 2. Correlation coefficient ( $r^2$ ) = 0.837. Figure prepared by NUSMed noncoding RNA Core Facility, National University of Singapore.

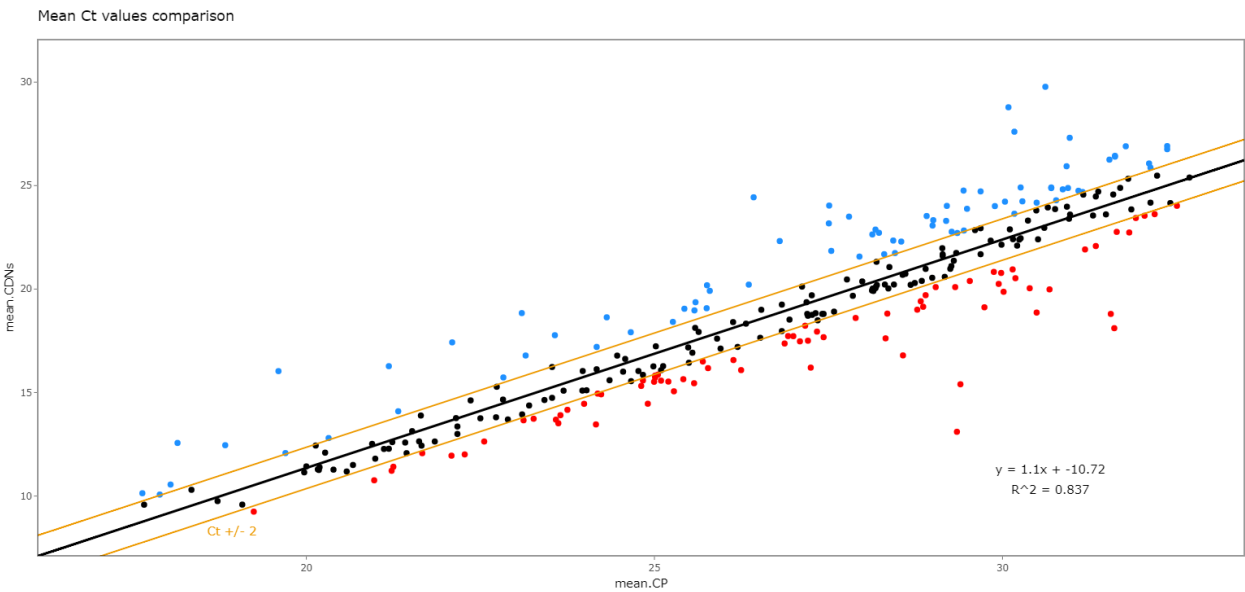

Supplement: s1 [file s1]
